# Supplementary material for: Joint actions of diverse transcription factor families establish neuron-type identities and promote enhancer selectivity
Source: HighWire-hosted journal article supplement (doi:10.1101/gr.275623.121), 2022-01-24
Supplement: Supplemental_Table_S1.xlsx [file Supplemental_Table_S1.xlsx]

## Sheet: TF RNAi library
Gene.stable.ID	Gene.name	Sequence.name	DBD	Library	Clone.name	Off.targets	Source	Confidence
WBGene00017967	ada-2	F32A5.1	ZF - C2H2	JA	sjj_F32A5.1		CisBP + wTF2.0	High
WBGene00000095	aha-1	C25A1.11	bHLH	JA	sjj_C25A1.11		CisBP + wTF2.0	High
WBGene00000096	ahr-1	C41G7.5	bHLH	JA	sjj_C41G7.5		CisBP + wTF2.0	High
WBGene00044330	alr-1	R08B4.2	HD	MV	mv_R08B4.2		CisBP + wTF2.0	High
WBGene00019424	aptf-1	K06A1.1	AP-2	JA	sjj_K06A1.1		CisBP + wTF2.0	High
WBGene00013383	aptf-2	Y62E10A.17	AP-2	JA	sjj_Y62E10A.17		CisBP + wTF2.0	High
WBGene00009203	aptf-3	F28C6.2	AP-2	JA	sjj_F28C6.2		CisBP + wTF2.0	High
WBGene00009202	aptf-4	F28C6.1	AP-2	MV	mv_F28C6.1		CisBP + wTF2.0	High
WBGene00044689	arid-1	Y108G3AL.7	ARID/BRIGHT	NF	pNF487		New CisBP	High
WBGene00020368	ast-1	T08H4.3	WH - ETS	MV	mv_T08H4.3		CisBP + wTF2.0	High
WBGene00000220	atf-2	K08F8.2	bZIP	JA	sjj_K08F8.2		CisBP + wTF2.0	High
WBGene00000221	atf-5	T04C10.4	bZIP	JA	sjj_T04C10.4		CisBP + wTF2.0	High
WBGene00000222	atf-6	F45E6.2	bZIP	JA	sjj_F45E6.2		CisBP + wTF2.0	High
WBGene00000223	atf-7	C07G2.2	bZIP	MV	mv_C07G2.2		CisBP + wTF2.0	High
WBGene00017535	atf-8	F17A9.3	bZIP	NF	pNF500		CisBP + wTF2.0	High
WBGene00013878	atfs-1	ZC376.7	bZIP	MV	mv_ZC376.7		CisBP + wTF2.0	High
WBGene00008081	athp-1	C44B9.4	AT Hook	JA	sjj_C44B9.4		CisBP + wTF2.0	High
WBGene00019217	athp-2	H20J04.2	AT Hook	JA	sjj_H20J04.2		Manually curated from wTF2.0	Medium
WBGene00013799	athp-3	Y116A8C.22	AT Hook	MV	mv_Y116A8C.22		CisBP + wTF2.0	High
WBGene00017317	attf-2	F09G2.9	AT Hook	JA	sjj_F09G2.9		Manually curated from wTF2.0	Medium
WBGene00015477	attf-4	C05D10.1	AT Hook	JA	sjj_C05D10.1		Manually curated from wTF2.0	Medium
WBGene00020214	attf-5	T04G9.1	AT Hook	JA	sjj_T04G9.1		Manually curated from wTF2.0	Medium
WBGene00012474	attf-6	Y18D10A.1	AT Hook	JA	sjj_Y18D10A.1		Manually curated from wTF2.0	Medium
WBGene00015091	B0261.1	B0261.1	MYB	JA	sjj_B0261.1		Manually curated from wTF2.0	Medium
WBGene00015138	B0310.2	B0310.2	ZF - C2H2	JA	sjj_B0310.2		CisBP + wTF2.0	High
WBGene00015147	B0336.7	B0336.7	ZF - THAP	JA	sjj_B0336.7		CisBP + wTF2.0	High
WBGene00000238	bar-1	C54D1.6	β-catenin/armadillo	NF	pNF490		Manually curated from wTF2.0	Medium
WBGene00001470	baz-2	ZK783.4	MBD	NF	pNF540		New CisBP	High
WBGene00017430	bcl-11	F13H6.1	ZF - C2H2	JA	sjj_F13H6.1		CisBP + wTF2.0	High
WBGene00012674	bed-1	Y39B6A.12	ZF - BED	NF	pNF567		Manually curated from wTF2.0	Medium
WBGene00012943	bed-2	Y47D3B.9	ZF - BED	JA	sjj_Y47D3B.9		Manually curated from wTF2.0	Medium
WBGene00009133	bed-3	F25H8.6	ZF - BED	MV	mv_F25H8.6		CisBP + wTF2.0	High
WBGene00003847	blmp-1	F25D7.3	ZF - C2H2	JA	sjj_F25D7.3		CisBP + wTF2.0	High
WBGene00044791	bnc-1	F55C5.11	ZF - C2H2	NF	pNF509		New CisBP	High
WBGene00007223	C01F6.9	C01F6.9	ZF - C2H2	JA	sjj_C01F6.9		Manually curated from wTF2.0	Medium
WBGene00015352	C02F5.12	C02F5.12	ZF - C2H2	NF	pNF571		Manually curated from wTF2.0	Medium
WBGene00015451	C04F5.9	C04F5.9	ZF - C2H2	JA	sjj_C04F5.9		CisBP + wTF2.0	High
WBGene00015507	C06A6.2	C06A6.2	MADF	MV	mv_C06A6.2		New CisBP	High
WBGene00015527	C06E2.1	C06E2.1	ZF - C2H2	JA	sjj_C06E2.1		Manually curated from wTF2.0	Medium
WBGene00015649	C09F5.3	C09F5.3	ZF - C2H2	JA	sjj_C09F5.3		CisBP + wTF2.0	High
WBGene00015809	C16A3.4	C16A3.4	ZF - C2H2	JA	sjj_C16A3.4		Manually curated from wTF2.0	High
WBGene00015966	C18C4.5	C18C4.5	bZIP	MV	mv_C18C4.5		New CisBP	High
WBGene00016154	C27A12.2	C27A12.2	ZF - C2H2	JA	sjj_C27A12.2		CisBP + wTF2.0	High
WBGene00044386	C27A2.7	C27A2.7	ZF - C2H2	NF	pNF568		New CisBP	High
WBGene00016189	C28G1.4	C28G1.4	ZF - C2H2	JA	sjj_C28G1.4		Manually curated from wTF2.0	High
WBGene00016269	C30G4.4	C30G4.4	TSC-22/DIP/BUN	NF	pNF560		CisBP + wTF2.0	High
WBGene00016320	C32E8.1	C32E8.1	bZIP	NF	pNF501		New CisBP	High
WBGene00008007	C38D4.7	C38D4.7	ZF - C2H2	JA	sjj_C38D4.7		Manually curated from wTF2.0	Medium
WBGene00045078	C46C2.7	C46C2.7	AP-2	NF	pNF486		New CisBP	High
WBGene00016712	C46E10.8	C46E10.8	ZF - C2H2	JA	sjj_C46E10.8		CisBP + wTF2.0	High
WBGene00016713	C46E10.9	C46E10.9	ZF - C2H2	JA	sjj_C46E10.9		Manually curated from wTF2.0	High
WBGene00008217	C50B6.1	C50B6.1	HD	MV	mv_C50B6.1		New CisBP	High
WBGene00008236	C50F4.12	C50F4.12	MTERF	MV	mv_C50F4.12		New CisBP	High
WBGene00016888	C52E12.1	C52E12.1	ZF - C2H2	NF	pNF572		Manually curated from wTF2.0	Medium
WBGene00020251	camt-1	T05C1.4	IPT/TIG	JA	sjj_T05C1.4		CisBP + wTF2.0	High
WBGene00000383	cdc-14	C17G10.4	ZF - THAP	MV	mv_C17G10.4		CisBP + wTF2.0	High
WBGene00008386	cdc-5L	D1081.8	MYB	JA	sjj_D1081.8		CisBP + wTF2.0	High
WBGene00016997	cebp-1	D1005.3	bZIP	JA	sjj_D1005.3		CisBP + wTF2.0	High
WBGene00016754	cebp-2	C48E7.11	bZIP	NF	pNF499		CisBP + wTF2.0	High
WBGene00000428	ceh-1	F16H11.4	HD	NF	pNF525		CisBP + wTF2.0	High
WBGene00000435	ceh-10	W03A3.1	HD	JA	sjj_W03A3.1		CisBP + wTF2.0	High
WBGene00012584	ceh-100	Y38E10A.6	HD	JA	sjj_Y38E10A.6		CisBP + wTF2.0	High
WBGene00000436	ceh-12	F33D11.4	HD	MV	mv_F33D11.4		CisBP + wTF2.0	High
WBGene00000437	ceh-13	R13A5.5	HD	JA	sjj_R13A5.5		CisBP + wTF2.0	High
WBGene00000438	ceh-14	F46C8.5	HD	JA	sjj_F46C8.5		CisBP + wTF2.0	High
WBGene00000439	ceh-16	C13G5.1	HD	NF	pNF522		CisBP + wTF2.0	High
WBGene00000440	ceh-17	D1007.1	HD	JA	sjj_D1007.1		CisBP + wTF2.0	High
WBGene00000441	ceh-18	ZC64.3	HD	JA	sjj_ZC64.3		CisBP + wTF2.0	High
WBGene00000442	ceh-19	F20D12.6	HD	MV	mv_F20D12.6		CisBP + wTF2.0	High
WBGene00000429	ceh-2	C27A12.5	HD	JA	sjj_C27A12.5		CisBP + wTF2.0	High
WBGene00000443	ceh-20	F31E3.1	HD	JA	sjj_F31E3.1		CisBP + wTF2.0	High
WBGene00000444	ceh-21	T26C11.6	HD	JA	sjj_T26C11.6		CisBP + wTF2.0	High
WBGene00000445	ceh-22	F29F11.5	HD	JA	sjj_F29F11.5		CisBP + wTF2.0	High
WBGene00000446	ceh-23	ZK652.5	HD	JA	sjj_ZK652.5		CisBP + wTF2.0	High
WBGene00000447	ceh-24	F55B12.1	HD	JA	sjj_F55B12.1		CisBP + wTF2.0	High
WBGene00000449	ceh-27	F46F3.1	HD	MV	mv_F46F3.1		CisBP + wTF2.0	High
WBGene00000450	ceh-28	K03A11.3	HD	JA	sjj_K03A11.3		CisBP + wTF2.0	High
WBGene00000451	ceh-30	C33D12.7	HD	NF	pNF526		CisBP + wTF2.0	High
WBGene00000452	ceh-31	C33D12.1	HD	NF	pNF529		CisBP + wTF2.0	High
WBGene00000453	ceh-32	W05E10.3	HD	JA	sjj_W05E10.3		CisBP + wTF2.0	High
WBGene00000454	ceh-33	C10G8.7	HD	JA	sjj_C10G8.7		CisBP + wTF2.0	High
WBGene00000455	ceh-34	C10G8.6	HD	MV	mv_C10G8.6		CisBP + wTF2.0	High
WBGene00000457	ceh-36	C37E2.4	HD	JA	sjj_C37E2.4		CisBP + wTF2.0	High
WBGene00000458	ceh-37	C37E2.5	HD	JA	sjj_C37E2.5		CisBP + wTF2.0	High
WBGene00000459	ceh-38	F22D3.1	HD	MV	mv_F22D3.1		CisBP + wTF2.0	High
WBGene00000460	ceh-39	T26C11.7	HD	MV	mv_T26C11.7		CisBP + wTF2.0	High
WBGene00000461	ceh-40	F17A2.5	HD	JA	sjj_F17A2.5		CisBP + wTF2.0	High
WBGene00000462	ceh-41	T26C11.5	HD	JA	sjj_T26C11.5		CisBP + wTF2.0	High
WBGene00000463	ceh-43	C28A5.4	HD	JA	sjj_C28A5.4		CisBP + wTF2.0	High
WBGene00000464	ceh-44	Y54F10AM.4	HD	NF	pNF521		CisBP + wTF2.0	High
WBGene00022837	ceh-45	ZK993.1	HD	JA	sjj_ZK993.1		CisBP + wTF2.0	High
WBGene00015934	ceh-48	C17H12.9	HD	MV	mv_C17H12.9		CisBP + wTF2.0	High
WBGene00017538	ceh-49	F17A9.6	HD	JA	sjj_F17A9.6		CisBP + wTF2.0	High
WBGene00000430	ceh-5	C16C2.1	HD	NF	pNF530		CisBP + wTF2.0	High
WBGene00013583	ceh-51	Y80D3A.3	HD	JA	sjj_Y80D3A.3		CisBP + wTF2.0	High
WBGene00015651	ceh-53	C09G12.1	HD	JA	sjj_C09G12.1		CisBP + wTF2.0	High
WBGene00020485	ceh-54	T13C5.4	HD	MV	mv_T13C5.4		CisBP + wTF2.0	High
WBGene00007416	ceh-57	C07E3.5	HD	JA	sjj_C07E3.5		CisBP + wTF2.0	High
WBGene00007417	ceh-58	C07E3.6	HD	JA	sjj_C07E3.6		CisBP + wTF2.0	High
WBGene00000431	ceh-6	K02B12.1	HD	JA	sjj_K02B12.1		CisBP + wTF2.0	High
WBGene00017690	ceh-60	F22A3.5	HD	JA	sjj_F22A3.5		CisBP + wTF2.0	High
WBGene00011069	ceh-62	R06F6.6	HD	NF	pNF523		CisBP + wTF2.0	High
WBGene00045215	ceh-63	C02F12.10	HD	NF	pNF517		New CisBP	High
WBGene00000432	ceh-7	C34C6.8	HD	JA	sjj_C34C6.8		CisBP + wTF2.0	High
WBGene00013876	ceh-74	ZC376.4	HD	JA	sjj_ZC376.4		CisBP + wTF2.0	High
WBGene00008242	ceh-75	C50H2.6	HD	NF	pNF524		CisBP + wTF2.0	High
WBGene00007749	ceh-79	C26E1.3	HD	JA	sjj_C26E1.3		CisBP + wTF2.0	High
WBGene00000433	ceh-8	ZK265.4	HD	JA	sjj_ZK265.4		CisBP + wTF2.0	High
WBGene00018434	ceh-81	F45C12.3	HD	JA	sjj_F45C12.3		CisBP + wTF2.0	High
WBGene00018433	ceh-82	F45C12.2	HD	JA	sjj_F45C12.2		Manually curated from wTF2.0	Medium
WBGene00018446	ceh-83	F45C12.15	HD	NF	pNF531		CisBP + wTF2.0	High
WBGene00016557	ceh-84	C40D2.4	HD	NF	pNF532		CisBP + wTF2.0	High
WBGene00019137	ceh-85	F59H6.6	HD	JA	sjj_F59H6.6		CisBP + wTF2.0	High
WBGene00018355	ceh-86	F42G2.6	HD	JA	sjj_F42G2.6		CisBP + wTF2.0	High
WBGene00018022	ceh-87	F34D6.2	HD	NF	pNF514		CisBP + wTF2.0	High
WBGene00008195	ceh-88	C49C3.5	HD	JA	sjj_C49C3.5		CisBP + wTF2.0	High
WBGene00009231	ceh-89	F28H6.2	HD	JA	sjj_F28H6.2		CisBP + wTF2.0	High
WBGene00000434	ceh-9	Y65B4BR.9	HD	NF	pNF527		CisBP + wTF2.0	High
WBGene00010995	ceh-90	R03E1.4	HD	NF	pNF515		CisBP + wTF2.0	High
WBGene00013425	ceh-91	Y66A7A.5	HD	JA	sjj_Y66A7A.5		CisBP + wTF2.0	High
WBGene00013431	ceh-92	Y66D12A.5	HD	NF	pNF518		New CisBP	High
WBGene00019864	ceh-93	R04A9.5	HD	NF	pNF520		CisBP + wTF2.0	High
WBGene00044032	ceh-99	T21B4.17	HD	NF	pNF516		New CisBP	High
WBGene00000467	cep-1	F52B5.5	p53	JA	sjj_F52B5.5		Manually curated from wTF2.0	High
WBGene00000468	ces-1	F43G9.11	ZF - C2H2	JA	sjj_F43G9.11		CisBP + wTF2.0	High
WBGene00000469	ces-2	ZK909.4	bZIP	JA	sjj_ZK909.4		CisBP + wTF2.0	High
WBGene00000472	cey-1	F33A8.3	CSD	JA	sjj_F33A8.3		CisBP + wTF2.0	High
WBGene00000473	cey-2	F46F11.2	CSD	JA	sjj_F46F11.2		CisBP + wTF2.0	High
WBGene00000474	cey-3	M01E11.5	CSD	JA	sjj_M01E11.5		CisBP + wTF2.0	High
WBGene00000475	cey-4	Y39A1C.3	CSD	JA	sjj_Y39A1C.3		CisBP + wTF2.0	High
WBGene00000476	cfi-1	T23D8.8	ARID/BRIGHT	JA	sjj_T23D8.8		CisBP + wTF2.0	High
WBGene00007053	chd-7	T04D1.4	MYB	NF	pNF543		CisBP + wTF2.0	High
WBGene00000483	che-1	C55B7.12	ZF - C2H2	JA	sjj_C55B7.12		CisBP + wTF2.0	High
WBGene00019108	chpf-2	F59D6.7	STAT	NF	pNF552		New CisBP	High
WBGene00019629	cid-1	K10D2.3	ZF - C2H2	MV	mv_K10D2.3		Manually curated from wTF2.0	Medium
WBGene00000521	cky-1	C15C8.2	bHLH	MV	mv_C15C8.2		CisBP + wTF2.0	High
WBGene00000561	cnd-1	C34E10.7	bHLH	MV	mv_C34E10.7		CisBP + wTF2.0	High
WBGene00000584	cog-1	R03C1.3	HD	MV	mv_R03C1.3		CisBP + wTF2.0	High
WBGene00000793	crh-1	Y41C4A.4	bZIP	MV	mv_Y41C4A.4		CisBP + wTF2.0	High
WBGene00016162	crh-2	C27D6.4	bZIP	JA	sjj_C27D6.4		CisBP + wTF2.0	High
WBGene00006424	ctbp-1	F49E10.5	ZF - THAP	JA	sjj_F49E10.5		CisBP + wTF2.0	High
WBGene00008363	D1046.2	D1046.2	ZF - C2H2	JA	sjj_D1046.2		Manually curated from wTF2.0	Medium
WBGene00008417	D2030.7	D2030.7	ZF - C2H2	JA	sjj_D2030.7		Manually curated from wTF2.0	Medium
WBGene00044610	D2092.10	D2092.10	ZF - C2H2	NF	pNF569		New CisBP	High
WBGene00000895	dac-1	B0412.1	WH - DAC	JA	sjj_B0412.1		CisBP + wTF2.0	High
WBGene00000908	daf-12	F11A1.3	ZF - NHR	JA	sjj_F11A1.3		CisBP + wTF2.0	High
WBGene00000912	daf-16	R13H8.1	WH - FH	JA	sjj_R13H8.1		CisBP + wTF2.0	High
WBGene00000914	daf-19	F33H1.1	WH - RFX	JA	sjj_F33H1.1		CisBP + wTF2.0	High
WBGene00000899	daf-3	F25E2.5	MH1	JA	sjj_F25E2.5		CisBP + wTF2.0	High
WBGene00000904	daf-8	R05D11.1	MH1	MV	mv_R05D11.1		CisBP + wTF2.0	High
WBGene00000995	die-1	C18D1.1	ZF - C2H2	JA	sjj_C18D1.1		CisBP + wTF2.0	High
WBGene00007929	dmd-10	C34D1.1	ZF - DM	JA	sjj_C34D1.1		CisBP + wTF2.0	High
WBGene00007930	dmd-11	C34D1.2	ZF - DM	JA	sjj_C34D1.2		CisBP + wTF2.0	High
WBGene00012832	dmd-3	Y43F8C.10	ZF - DM	JA	sjj_Y43F8C.10		CisBP + wTF2.0	High
WBGene00007776	dmd-4	C27C12.6	ZF - DM	JA	sjj_C27C12.6		CisBP + wTF2.0	High
WBGene00017326	dmd-5	F10C1.5	ZF - DM	JA	sjj_F10C1.5		CisBP + wTF2.0	High
WBGene00007058	dmd-6	F13G11.1	ZF - DM	JA	sjj_F13G11.1		CisBP + wTF2.0	High
WBGene00019521	dmd-7	K08B12.2	ZF - DM	NF	pNF600		CisBP + wTF2.0	High
WBGene00020708	dmd-8	T22H9.4	ZF - DM	NF	pNF602		CisBP + wTF2.0	High
WBGene00022060	dmd-9	Y67D8A.3	ZF - DM	JA	sjj_Y67D8A.3		CisBP + wTF2.0	High
WBGene00001029	dnj-11	F38A5.13	MYB	JA	sjj_F38A5.13		CisBP + wTF2.0	High
WBGene00001035	dnj-17	T03F6.2	ZF - C2H2	JA	sjj_T03F6.2		Manually curated from wTF2.0	High
WBGene00001061	dpl-1	T23G7.1	WH - TDP	MV	mv_T23G7.1		CisBP + wTF2.0	High
WBGene00001062	dpr-1	R10D12.2	ZF - NHR	JA	sjj_R10D12.2		CisBP + wTF2.0	High
WBGene00001086	dpy-27	R13G10.1	Unknown	NF	pNF562		New CisBP	High
WBGene00009584	drap-1	F40F9.7	CBF	NF	pNF654		Manually curated from wTF2.0	Medium
WBGene00001092	dro-1	F53A2.5	CBF	JA	sjj_F53A2.5		Manually curated from wTF2.0	Medium
WBGene00001096	dsc-1	C18B12.3	HD	JA	sjj_C18B12.3		CisBP + wTF2.0	High
WBGene00022554	duxl-1	ZC204.2	HD	JA	sjj_ZC204.2		CisBP + wTF2.0	High
WBGene00022861	dve-1	ZK1193.5	HD	JA	sjj_ZK1193.5		CisBP + wTF2.0	High
WBGene00013128	dxbp-1	Y52B11A.9	ZF - C2H2	JA	sjj_Y52B11A.9		Manually curated from wTF2.0	Medium
WBGene00011696	eea-1	T10G3.5	ZF - C2H2	JA	sjj_T10G3.5		Manually curated from wTF2.0	Medium
WBGene00001161	efl-1	Y102A5C.18	WH - TDP	NF	pNF565		CisBP + wTF2.0	High
WBGene00001162	efl-2	Y48C3A.17	WH - TDP	MV	mv_Y48C3A.17		CisBP + wTF2.0	High
WBGene00009899	efl-3	F49E12.6	WH - TDP	MV	mv_F49E12.6		CisBP + wTF2.0	High
WBGene00001182	egl-13	T22B7.1	HMG box	JA	sjj_T22B7.1		CisBP + wTF2.0	High
WBGene00001186	egl-18	F55A8.1	ZF - GATA	JA	sjj_F55A8.1		CisBP + wTF2.0	High
WBGene00001194	egl-27	C04A2.3	ZF - GATA	JA	sjj_C04A2.3		CisBP + wTF2.0	High
WBGene00001204	egl-38	C04G2.7	PRD-FULL	MV	mv_C04G2.7		CisBP + wTF2.0	High
WBGene00001207	egl-43	R53.3	ZF - C2H2	JA	sjj_R53.3		CisBP + wTF2.0	High
WBGene00001208	egl-44	F28B12.2	TEA/ATTS	NF	pNF559		CisBP + wTF2.0	High
WBGene00001210	egl-46	K11G9.4	ZF - C2H2	JA	sjj_K11G9.4		CisBP + wTF2.0	High
WBGene00001174	egl-5	C08C3.1	HD	JA	sjj_C08C3.1		CisBP + wTF2.0	High
WBGene00007772	egrh-1	C27C12.2	ZF - C2H2	JA	sjj_C27C12.2		CisBP + wTF2.0	High
WBGene00043705	egrh-2	Y55F3AM.7	ZF - C2H2	NF	pNF570	egrh-1	New CisBP	High
WBGene00044651	egrh-3	Y94H6A.11	ZF - C2H2	NF	pNF508		New CisBP	High
WBGene00001223	ehn-3	ZK616.10	ZF - C2H2	MV	mv_ZK616.10		CisBP + wTF2.0	High
WBGene00013676	ekl-4	Y105E8A.17	MYB	MV	mv_Y105E8A.17		Manually curated from wTF2.0	Medium
WBGene00016029	elf-1	C24A1.2	WH - ETS	MV	mv_C24A1.2		CisBP + wTF2.0	High
WBGene00022207	elk-2	Y73B3A.5	WH	JA	sjj_C37F5.1	This RNAi overlaps with lin-1	CisBP + wTF2.0	High
WBGene00001249	elt-1	W09C2.1	ZF - GATA	JA	sjj_W09C2.1		CisBP + wTF2.0	High
WBGene00001250	elt-2	C33D3.1	ZF - GATA	JA	sjj_C33D3.1		CisBP + wTF2.0	High
WBGene00001251	elt-3	K02B9.4	ZF - GATA	JA	sjj_K02B9.4		CisBP + wTF2.0	High
WBGene00001252	elt-4	C39B10.6	ZF - GATA	NF	pNF604		CisBP + wTF2.0	High
WBGene00001253	elt-6	F52C12.5	ZF - GATA	JA	sjj_F52C12.5		CisBP + wTF2.0	High
WBGene00015981	elt-7	C18G1.2	ZF - GATA	MV	mv_C18G1.2		CisBP + wTF2.0	High
WBGene00001310	end-1	F58E10.2	ZF - GATA	JA	sjj_F58E10.2		CisBP + wTF2.0	High
WBGene00001311	end-3	F58E10.5	ZF - GATA	JA	sjj_F58E10.5		CisBP + wTF2.0	High
WBGene00001324	eor-1	R11E3.6	ZF - C2H2	MV	mv_R11E3.6		CisBP + wTF2.0	High
WBGene00016870	ets-10	C52B9.11	WH - ETS	NF	pNF656		CisBP + wTF2.0	High
WBGene00017687	ets-4	F22A3.1	WH - ETS	NF	pNF655		CisBP + wTF2.0	High
WBGene00016600	ets-5	C42D8.4	WH - ETS	JA	sjj_C42D8.4		CisBP + wTF2.0	High
WBGene00017601	ets-7	F19F10.5	WH - ETS	JA	sjj_F19F10.5		CisBP + wTF2.0	High
WBGene00016798	ets-8	C50A2.4	WH - ETS	NF	pNF563		CisBP + wTF2.0	High
WBGene00016865	ets-9	C52B9.2	WH - ETS	JA	sjj_C52B9.2		CisBP + wTF2.0	High
WBGene00013147	eyg-1	Y53C12C.1	HD	JA	sjj_Y53C12C.1		CisBP + wTF2.0	High
WBGene00008640	F10B5.3	F10B5.3	ZF - C2H2	JA	sjj_F10B5.3		CisBP + wTF2.0	High
WBGene00017352	F10E7.11	F10E7.11	MYB	JA	sjj_F10E7.11		Manually curated from wTF2.0	Medium
WBGene00008844	F15A4.10	F15A4.10	bZIP	MV	mv_F15A4.10		New CisBP	High
WBGene00017598	F19F10.1	F19F10.1	WH - ETS	JA	sjj_F19F10.1		CisBP + wTF2.0	High
WBGene00017605	F19F10.9	F19F10.9	SART-1	NF	pNF550		New CisBP	High
WBGene00017651	F21A9.2	F21A9.2	ZF - C2H2	MV	mv_F21A9.2		Manually curated from wTF2.0	Medium
WBGene00009009	F21D5.4	F21D5.4	Brinker	MV	mv_F21D5.4		New CisBP	High
WBGene00009014	F21D5.9	F21D5.9	ZF - C2H2	JA	sjj_F21D5.9		CisBP + wTF2.0	High
WBGene00009026	F21G4.5	F21G4.5	ZF - C2H2	MV	mv_F21G4.5		Manually curated from wTF2.0	Medium
WBGene00009084	F23B12.7	F23B12.7	CBF	JA	sjj_F23B12.7		Manually curated from wTF2.0	Medium
WBGene00017814	F26A10.2	F26A10.2	ZF - C2H2	JA	sjj_F26A10.2		Manually curated from wTF2.0	High
WBGene00005011	F26F4.8	F26F4.8	ZF - C2H2	JA	sjj_F26F4.8		CisBP + wTF2.0	High
WBGene00009190	F27D4.6	F27D4.6	ZF - C2H2	JA	sjj_F27D4.6		Manually curated from wTF2.0	Medium
WBGene00009365	F33H1.4	F33H1.4	ZF - C2H2	JA	sjj_F33H1.4		Manually curated from wTF2.0	Medium
WBGene00018140	F37B4.10	F37B4.10	ZF - C2H2	JA	sjj_F37B4.10		Manually curated from wTF2.0	Medium
WBGene00018317	F41H10.4	F41H10.4	bZIP	NF	pNF504		New CisBP	High
WBGene00018420	F44E2.7	F44E2.7	ZF - C2H2	JA	sjj_F44E2.7		Manually curated from wTF2.0	Medium
WBGene00018567	F47E1.3	F47E1.3	ZF - C2H2	NF	pNF592		CisBP + wTF2.0	High
WBGene00009923	F52B5.7	F52B5.7	ZF - C2H2	NF	pNF573		CisBP + wTF2.0	High
WBGene00018836	F54F2.9	F54F2.9	MYB	JA	sjj_F54F2.9		CisBP + wTF2.0	High
WBGene00018959	F56D1.1	F56D1.1	ZF - C2H2	MV	mv_F56D1.1		CisBP + wTF2.0	High
WBGene00019011	F57C9.4	F57C9.4	ZF - C2H2	JA	sjj_F57C9.4		CisBP + wTF2.0	High
WBGene00010264	F58G1.2	F58G1.2	ZF - C2H2	MV	mv_F58G1.2		CisBP + wTF2.0	High
WBGene00001400	fax-1	F56E3.4	ZF - NHR	JA	sjj_F56E3.4		CisBP + wTF2.0	High
WBGene00012639	fezf-1	Y38H8A.5	ZF - C2H2	JA	sjj_Y38H8A.5		CisBP + wTF2.0	High
WBGene00001442	fkh-10	C25A1.2	WH - FH	JA	sjj_C25A1.2		CisBP + wTF2.0	High
WBGene00001434	fkh-2	T14G12.4	WH - FH	MV	mv_T14G12.4		CisBP + wTF2.0	High
WBGene00001435	fkh-3	C29F7.4	WH - FH	JA	sjj_C29F7.4		CisBP + wTF2.0	High
WBGene00001436	fkh-4	C29F7.5	WH - FH	MV	mv_C29F7.5		CisBP + wTF2.0	High
WBGene00001437	fkh-5	F26A1.2	WH - FH	MV	mv_F26A1.2		CisBP + wTF2.0	High
WBGene00001438	fkh-6	B0286.5	WH - FH	JA	sjj_B0286.5		CisBP + wTF2.0	High
WBGene00001440	fkh-8	F40H3.4	WH - FH	MV	mv_F40H3.4		CisBP + wTF2.0	High
WBGene00001441	fkh-9	K03C7.2	WH - FH	NF	pNF564		CisBP + wTF2.0	High
WBGene00012435	flh-1	Y11D7A.12	ZF - FLYWCH	JA	sjj_Y11D7A.12		Manually curated from wTF2.0	High
WBGene00016138	flh-2	C26E6.2	ZF - FLYWCH	NF	pNF603		Manually curated from wTF2.0	High
WBGene00012436	flh-3	Y11D7A.13	ZF - FLYWCH	JA	sjj_Y11D7A.13		Manually curated from wTF2.0	High
WBGene00001345	fos-1	F29G9.4	bZIP	JA	sjj_F29G9.4		CisBP + wTF2.0	High
WBGene00001560	gei-3	T22H6.6	HMG box	JA	sjj_T22H6.6		CisBP + wTF2.0	High
WBGene00001565	gei-8	C14B9.6	MYB	JA	sjj_C14B9.6		CisBP + wTF2.0	High
WBGene00001585	gfl-1	M04B2.3	YEATS	MV	mv_M04B2.3		CisBP + wTF2.0	High
WBGene00015285	gmeb-1	C01B12.2	SAND	JA	sjj_C01B12.2		CisBP + wTF2.0	High
WBGene00010010	gmeb-2	F53H4.5	SAND	JA	sjj_F53H4.5		CisBP + wTF2.0	High
WBGene00008092	gmeb-3	C44F1.2	AT Hook	JA	sjj_C44F1.2		CisBP + wTF2.0	High
WBGene00001707	grh-1	Y48G8AR.1	CP2	JA	sjj_Y48G8AR.1		CisBP + wTF2.0	High
WBGene00001734	grl-25	ZK643.8	WT1	NF	pNF566		CisBP + wTF2.0	High
WBGene00010401	H16D19.3	H16D19.3	ZF - C2H2	MV	mv_H16D19.3		Manually curated from wTF2.0	Medium
WBGene00001820	ham-1	F53B2.6	WH	MV	mv_F53B2.6		Manually curated from wTF2.0	Medium
WBGene00001821	ham-2	C07A12.1	ZF - C2H2	JA	sjj_C07A12.1		CisBP + wTF2.0	High
WBGene00001824	hbl-1	F13D11.2	ZF - C2H2	JA	sjj_F13D11.2		CisBP + wTF2.0	High
WBGene00001851	hif-1	F38A6.3	bHLH	JA	sjj_F38A6.3		Manually curated from wTF2.0	High
WBGene00001874	him-17	T09E8.2	ZF - THAP	MV	mv_T09E8.2		New CisBP	High
WBGene00001867	him-8	T07G12.12	ZF - C2H2	JA	sjj_T07G12.12		Manually curated from wTF2.0	Medium
WBGene00009553	hinf-1	F39B2.1	ZF - C2H2	JA	sjj_F39B2.1		CisBP + wTF2.0	High
WBGene00013976	hizr-1	ZK455.6	ZF - NHR	JA	sjj_ZK455.6		CisBP + wTF2.0	High
WBGene00001948	hlh-1	B0304.1	bHLH	JA	sjj_B0304.1		CisBP + wTF2.0	High
WBGene00001954	hlh-10	ZK682.4	bHLH	JA	sjj_ZK682.4		CisBP + wTF2.0	High
WBGene00001955	hlh-11	F58A4.7	bHLH	JA	sjj_F58A4.7		CisBP + wTF2.0	High
WBGene00001956	hlh-12	C28C12.8	bHLH	JA	sjj_C28C12.8		CisBP + wTF2.0	High
WBGene00001957	hlh-13	F48D6.3	bHLH	JA	sjj_F48D6.3		CisBP + wTF2.0	High
WBGene00001958	hlh-14	C18A3.8	bHLH	NF	pNF495		CisBP + wTF2.0	High
WBGene00001959	hlh-15	C43H6.8	bHLH	JA	sjj_C43H6.8		CisBP + wTF2.0	High
WBGene00001960	hlh-16	DY3.3	bHLH	NF	pNF496		CisBP + wTF2.0	High
WBGene00001961	hlh-17	F38C2.2	bHLH	NF	pNF492		CisBP + wTF2.0	High
WBGene00001962	hlh-19	F57C12.3	bHLH	JA	sjj_F57C12.3		CisBP + wTF2.0	High
WBGene00001949	hlh-2	M05B5.5	bHLH	MV	mv_M05B5.5		CisBP + wTF2.0	High
WBGene00001964	hlh-25	C17C3.7	bHLH	JA	sjj_C17C3.7		CisBP + wTF2.0	High
WBGene00001965	hlh-26	C17C3.8	bHLH	JA	sjj_C17C3.8		CisBP + wTF2.0	High
WBGene00001966	hlh-27	C17C3.10	bHLH	JA	sjj_C17C3.10		CisBP + wTF2.0	High
WBGene00001967	hlh-28	F31A3.2	bHLH	JA	sjj_F31A3.2		CisBP + wTF2.0	High
WBGene00001968	hlh-29	F31A3.4	bHLH	MV	mv_F31A3.4		CisBP + wTF2.0	High
WBGene00001950	hlh-3	T24B8.6	bHLH	JA	sjj_T24B8.6		CisBP + wTF2.0	High
WBGene00020930	hlh-30	W02C12.3	bHLH	JA	sjj_W02C12.3		CisBP + wTF2.0	High
WBGene00009540	hlh-31	F38C2.8	bHLH	JA	sjj_F38C2.8	hlh-32	CisBP + wTF2.0	High
WBGene00013665	hlh-32	Y105C5B.29	bHLH	JA	sjj_Y105C5B.29	hlh-31	CisBP + wTF2.0	High
WBGene00021446	hlh-33	Y39A3CR.6	bHLH	JA	sjj_Y39A3CR.6		CisBP + wTF2.0	High
WBGene00011327	hlh-34	T01D3.2	bHLH	MV	mv_T01D3.2		Manually curated from wTF2.0	Medium
WBGene00001951	hlh-4	T05G5.2	bHLH	MV	mv_T05G5.2		CisBP + wTF2.0	High
WBGene00001952	hlh-6	T15H9.3	bHLH	JA	sjj_T15H9.3		CisBP + wTF2.0	High
WBGene00001953	hlh-8	C02B8.4	bHLH	JA	sjj_C02B8.4		CisBP + wTF2.0	High
WBGene00018786	hmbx-1	F54A5.1	HD	JA	sjj_F54A5.1		CisBP + wTF2.0	High
WBGene00001971	hmg-1.1	Y48B6A.14	HMG box	MV	mv_Y48B6A.14		CisBP + wTF2.0	High
WBGene00001972	hmg-1.2	F47D12.4	HMG box	JA	sjj_F47D12.4		CisBP + wTF2.0	High
WBGene00001976	hmg-11	T05A7.4	AT Hook	JA	sjj_T05A7.4		Manually curated from wTF2.0	Medium
WBGene00001977	hmg-12	Y17G7A.1	AT Hook	JA	sjj_Y17G7A.1		CisBP + wTF2.0	High
WBGene00012209	hmg-20	W02D9.3	HMG box	JA	sjj_W02D9.3		CisBP + wTF2.0	High
WBGene00001973	hmg-3	C32F10.5	HMG box	JA	sjj_C32F10.5		CisBP + wTF2.0	High
WBGene00001974	hmg-4	T20B12.8	HMG box	JA	sjj_T20B12.8		CisBP + wTF2.0	High
WBGene00001975	hmg-5	F45E4.9	HMG box	JA	sjj_F45E4.9		CisBP + wTF2.0	High
WBGene00009827	hmg-6	F47G4.6	HMG box	JA	sjj_F47G4.6		CisBP + wTF2.0	High
WBGene00001979	hmp-2	K05C4.6	β-catenin/armadillo	NF	pNF491		Manually curated from wTF2.0	Medium
WBGene00001981	hnd-1	C44C10.8	bHLH	MV	mv_C44C10.8		CisBP + wTF2.0	High
WBGene00022020	hpo-39	Y61A9LA.9	bZIP	NF	pNF507		New CisBP	High
WBGene00002004	hsf-1	Y53C10A.12	WH - HSF	JA	sjj_Y53C10A.12		CisBP + wTF2.0	High
WBGene00007984	irx-1	C36F7.1	HD	JA	sjj_C36F7.1		CisBP + wTF2.0	High
WBGene00002169	isw-1	F37A4.8	AT Hook	MV	mv_F37A4.8		CisBP + wTF2.0	High
WBGene00012005	jun-1	T24H10.7	bZIP	JA	sjj_T24H10.7		CisBP + wTF2.0	High
WBGene00010553	K04C1.3	K04C1.3	ZF - C2H2	NF	pNF579		Manually curated from wTF2.0	Medium
WBGene00010704	K09A11.1	K09A11.1	ZF - BED	JA	sjj_K09A11.1		Manually curated from wTF2.0	Medium
WBGene00019598	K09H9.7	K09H9.7	ZF - C2H2	JA	sjj_K09H9.7		Manually curated from wTF2.0	Medium
WBGene00019611	K10B3.5	K10B3.5	ZF - C2H2	JA	sjj_K10B3.5		Manually curated from wTF2.0	Medium
WBGene00019651	K11D12.12	K11D12.12	ZF - C2H2	NF	pNF574		CisBP + wTF2.0	High
WBGene00010770	K11D2.4	K11D2.4	ZF - C2H2	JA	sjj_K11D2.4		CisBP + wTF2.0	High
WBGene00010771	K11D2.5	K11D2.5	MTERF	NF	pNF542		New CisBP	High
WBGene00019691	K12H6.12	K12H6.12	ZF - C2H2	JA	sjj_K12H6.12		Manually curated from wTF2.0	Medium
WBGene00018990	klf-1	F56F11.3	ZF - C2H2	JA	sjj_F56F11.3		CisBP + wTF2.0	High
WBGene00009998	klf-2	F53F8.1	ZF - C2H2	JA	sjj_F53F8.1		CisBP + wTF2.0	High
WBGene00003480	klf-3	F54H5.4	ZF - C2H2	MV	mv_F54H5.4		CisBP + wTF2.0	High
WBGene00013970	klu-1	ZK337.2	ZF - C2H2	MV	mv_ZK337.2		CisBP + wTF2.0	High
WBGene00022592	klu-2	ZC328.2	ZF - C2H2	JA	sjj_ZC328.2		CisBP + wTF2.0	High
WBGene00002245	lag-1	K08B4.1	CSL	MV	mv_K08B4.1		CisBP + wTF2.0	High
WBGene00019407	lect-2	K05F1.5	ZF - C2H2	JA	sjj_K05F1.5		Manually curated from wTF2.0	Medium
WBGene00002601	let-381	F26B1.7	WH - FH	JA	sjj_F26B1.7		CisBP + wTF2.0	High
WBGene00006492	let-391	C27A12.3	ZF - C2H2	JA	sjj_C27A12.3		CisBP + wTF2.0	High
WBGene00002717	let-526	C01G8.9	ARID/BRIGHT	JA	sjj_C01G8.9		CisBP + wTF2.0	High
WBGene00002783	let-607	F57B10.1	bZIP	JA	sjj_F57B10.1		CisBP + wTF2.0	High
WBGene00022500	lfi-1	ZC8.4	bZIP	JA	sjj_ZC8.4		CisBP + wTF2.0	High
WBGene00002987	lim-4	ZC64.4	HD	JA	sjj_ZC64.4		CisBP + wTF2.0	High
WBGene00002988	lim-6	K03E6.1	HD	JA	sjj_K03E6.1		CisBP + wTF2.0	High
WBGene00002989	lim-7	C04F1.3	HD	MV	mv_C04F1.3		CisBP + wTF2.0	High
WBGene00002990	lin-1	C37F5.1	WH - ETS	JA	sjj_C37F5.1		CisBP + wTF2.0	High
WBGene00003000	lin-11	ZC247.3	HD	JA	sjj_ZC247.3		CisBP + wTF2.0	High
WBGene00003002	lin-13	C03B8.4	ZF - C2H2	NF	pNF581		Manually curated from wTF2.0	Medium
WBGene00003003	lin-14	T25C12.1	Unknown	MV	mv_T25C12.1		New CisBP	High
WBGene00023497	lin-15B	ZK662.4	AT Hook	JA	sjj_ZK662.4		CisBP + wTF2.0	High
WBGene00003008	lin-22	Y54G2A.1	bHLH	NF	pNF493		CisBP + wTF2.0	High
WBGene00003012	lin-26	F18A1.2	ZF - C2H2	JA	sjj_F18A1.2		Manually curated from wTF2.0	Medium
WBGene00003014	lin-28	F02E9.2	CSD	MV	mv_F02E9.2		CisBP + wTF2.0	High
WBGene00003015	lin-29	W03C9.4	ZF - C2H2	JA	sjj_W03C9.4		CisBP + wTF2.0	High
WBGene00003017	lin-31	K10G6.1	WH - FH	JA	sjj_K10G6.1		CisBP + wTF2.0	High
WBGene00003018	lin-32	T14F9.5	bHLH	JA	sjj_T14F9.5		CisBP + wTF2.0	High
WBGene00003021	lin-36	F44B9.6	ZF - C2H2	JA	sjj_F44B9.6		CisBP + wTF2.0	High
WBGene00013006	lin-38	Y48E1B.7	ZF - C2H2	JA	sjj_Y48E1B.7		Manually curated from wTF2.0	Medium
WBGene00003024	lin-39	C07H6.7	HD	JA	sjj_C07H6.7		CisBP + wTF2.0	High
WBGene00003025	lin-40	T27C4.4	ZF - GATA	JA	sjj_T27C4.4		CisBP + wTF2.0	High
WBGene00003033	lin-48	F34D10.5	ZF - C2H2	MV	mv_F34D10.5		CisBP + wTF2.0	High
WBGene00003037	lin-54	JC8.6	CxC	MV	mv_JC8.6		New CisBP	High
WBGene00003044	lir-1	F18A1.3	ZF - C2H2	JA	sjj_F18A1.3		Manually curated from wTF2.0	Medium
WBGene00003045	lir-2	F18A1.4	ZF - C2H2	JA	sjj_F18A1.4		Manually curated from wTF2.0	Medium
WBGene00003046	lir-3	F37H8.1	ZF - C2H2	JA	sjj_F37H8.1		Manually curated from wTF2.0	Medium
WBGene00003052	lmn-1	DY3.2	bZIP	MV	mv_DY3.2		New CisBP	High
WBGene00009937	lsl-1	F52F12.4	ZF - C2H2	JA	sjj_F52F12.4		CisBP + wTF2.0	High
WBGene00016890	lst-5	C52E12.6	ZF - C2H2	NF	pNF594		CisBP + wTF2.0	High
WBGene00003087	lsy-2	F49H12.1	ZF - C2H2	MV	mv_F49H12.1		CisBP + wTF2.0	High
WBGene00009834	lsy-27	F47H4.1	ZF - C2H2	JA	sjj_F47H4.1		CisBP + wTF2.0	High
WBGene00019751	M03D4.4	M03D4.4	ZF - C2H2	NF	pNF596		CisBP + wTF2.0	High
WBGene00003114	mab-23	C32C4.5	ZF - DM	NF	pNF601		CisBP + wTF2.0	High
WBGene00003100	mab-3	Y53C12B.5	ZF - DM	MV	mv_Y53C12B.5		CisBP + wTF2.0	High
WBGene00003102	mab-5	C08C3.3	HD	JA	sjj_C08C3.3		CisBP + wTF2.0	High
WBGene00003106	mab-9	T27A1.6	T-box	JA	sjj_T27A1.6		CisBP + wTF2.0	High
WBGene00021942	madf-1	Y55F3BR.5	MADF	JA	sjj_Y55F3BR.5		New CisBP	High
WBGene00013717	madf-10	Y106G6H.4	MADF	JA	sjj_Y106G6H.4		CisBP + wTF2.0	High
WBGene00015468	madf-11	C05D2.6	MADF	NF	pNF537		New CisBP	High
WBGene00009461	madf-2	F36D1.1	MADF	JA	sjj_F36D1.1		CisBP + wTF2.0	High
WBGene00019218	madf-3	H20J04.3	MADF	NF	pNF539		CisBP + wTF2.0	High
WBGene00011575	madf-4	T07C12.11	MADF	JA	sjj_T07C12.11		CisBP + wTF2.0	High
WBGene00007242	madf-5	C01G12.1	MADF	NF	pNF538		CisBP + wTF2.0	High
WBGene00016930	madf-6	C54G6.1	MADF	MV	mv_C54G6.1		New CisBP	High
WBGene00008118	madf-8	C46F11.3	MADF	JA	sjj_C46F11.3		CisBP + wTF2.0	High
WBGene00022608	madf-9	ZC416.1	MADF	JA	sjj_ZC416.1		CisBP + wTF2.0	High
WBGene00077521	maf-1	F45H11.6	bZIP	NF	pNF505		New CisBP	High
WBGene00003148	mbf-1	H21P03.1	HTH	JA	sjj_H21P03.1		Manually curated from wTF2.0	Medium
WBGene00011315	mbr-1	T01C1.2	HTH	JA	sjj_T01C1.2		New CisBP	High
WBGene00013096	mcd-1	Y51H1A.6	ZF - C2H2	JA	sjj_Y51H1A.6		Manually curated from wTF2.0	Medium
WBGene00003163	mdl-1	R03E9.1	bHLH	MV	mv_R03E9.1		CisBP + wTF2.0	High
WBGene00003167	mec-3	F01D4.6	HD	JA	sjj_F01D4.6		CisBP + wTF2.0	High
WBGene00003180	med-1	T24D3.1	ZF - GATA	JA	sjj_T24D3.1		CisBP + wTF2.0	High
WBGene00003181	med-2	K04C2.6	ZF - GATA	JA			CisBP + wTF2.0	High
WBGene00003182	mef-2	W10D5.1	MADS box	JA	sjj_W10D5.1		CisBP + wTF2.0	High
WBGene00003210	mel-28	C38D4.3	AT Hook	JA	sjj_C38D4.3		Manually curated from wTF2.0	Medium
WBGene00003218	mep-1	M04B2.1	ZF - C2H2	JA	sjj_M04B2.1		Manually curated from wTF2.0	Medium
WBGene00003231	mex-6	AH6.5	ZF - CCCH	NF	pNF599		CisBP + wTF2.0	High
WBGene00011259	miz-1	R13.1	ZF - MIZ	JA	sjj_R13.1		CisBP + wTF2.0	High
WBGene00003376	mls-1	H14A12.4	T-box	JA	sjj_H14A12.4		CisBP + wTF2.0	High
WBGene00003377	mls-2	C39E6.4	HD	JA	sjj_C39E6.4		CisBP + wTF2.0	High
WBGene00003378	mml-1	T20B12.6	bHLH	MV	mv_T20B12.6		CisBP + wTF2.0	High
WBGene00003380	mnm-2	C10A4.8	ZF - C2H2	MV	mv_C10A4.8		CisBP + wTF2.0	High
WBGene00003509	mxl-1	T19B10.11	bHLH	JA	sjj_T19B10.11		CisBP + wTF2.0	High
WBGene00003510	mxl-2	F40G9.11	bHLH	JA	sjj_F40G9.11		CisBP + wTF2.0	High
WBGene00003511	mxl-3	F46G10.6	bHLH	MV	mv_F46G10.6		CisBP + wTF2.0	High
WBGene00004134	myrf-1	F59B10.1	p53	NF	pNF549		CisBP + wTF2.0	High
WBGene00008999	myrf-2	F21A10.2	p53	JA	sjj_F21A10.2		CisBP + wTF2.0	High
WBGene00003592	nfi-1	ZK1290.4	MH1	JA	sjj_ZK1290.4		CisBP + wTF2.0	High
WBGene00007048	nfx-1	C16A3.7	ZF - NF-X1 - 10 domains	JA	sjj_C16A3.7		CisBP + wTF2.0	High
WBGene00011614	nfya-1	T08D10.1	CBF	JA	sjj_T08D10.1		CisBP + wTF2.0	High
WBGene00043056	nfya-2	Y53H1A.5	CBF	JA	sjj_Y53H1A.5		CisBP + wTF2.0	High
WBGene00021132	nfyb-1	W10D9.4	CBF	MV	mv_W10D9.4		Manually curated from wTF2.0	Medium
WBGene00017742	nfyc-1	F23F1.1	CBF	JA	sjj_F23F1.1		Manually curated from wTF2.0	Medium
WBGene00003595	ngn-1	Y69A2AR.29	bHLH	JA	sjj_Y69A2AR.29		CisBP + wTF2.0	High
WBGene00003600	nhr-1	R09G11.2	ZF - NHR	MV	mv_R09G11.2		CisBP + wTF2.0	High
WBGene00003609	nhr-10	B0280.8	ZF - NHR	JA	sjj_B0280.8		CisBP + wTF2.0	High
WBGene00003690	nhr-100	C28D4.1	ZF - NHR	JA	sjj_C28D4.1		CisBP + wTF2.0	High
WBGene00003691	nhr-101	H12C20.6	ZF - NHR	NF	pNF605		CisBP + wTF2.0	High
WBGene00003692	nhr-102	T06C12.6	ZF - NHR	MV	mv_T06C12.6		CisBP + wTF2.0	High
WBGene00003693	nhr-103	F44C8.4	ZF - NHR	JA	sjj_F44C8.4		CisBP + wTF2.0	High
WBGene00003694	nhr-104	R11E3.5	ZF - NHR	JA	sjj_R11E3.5		CisBP + wTF2.0	High
WBGene00003695	nhr-105	C06G3.1	ZF - NHR	JA	sjj_C06G3.1		CisBP + wTF2.0	High
WBGene00003696	nhr-106	T01G6.4	ZF - NHR	JA	sjj_T01G6.4		CisBP + wTF2.0	High
WBGene00003697	nhr-107	C33G8.11	ZF - NHR	NF	pNF606		CisBP + wTF2.0	High
WBGene00003698	nhr-108	F35E8.12	ZF - NHR	JA	sjj_F35E8.12		CisBP + wTF2.0	High
WBGene00003699	nhr-109	T12C9.5	ZF - NHR	NF	pNF607		CisBP + wTF2.0	High
WBGene00003610	nhr-11	ZC410.1	ZF - NHR	JA	sjj_ZC410.1		CisBP + wTF2.0	High
WBGene00003700	nhr-110	Y46H3D.5	ZF - NHR	MV	mv_Y46H3D.5		CisBP + wTF2.0	High
WBGene00003701	nhr-111	F44G3.9	ZF - NHR	MV	mv_F44G3.9		CisBP + wTF2.0	High
WBGene00003702	nhr-112	Y70C5C.6	ZF - NHR	NF	pNF636		CisBP + wTF2.0	High
WBGene00003703	nhr-113	ZK1025.9	ZF - NHR	JA	sjj_ZK1025.9		CisBP + wTF2.0	High
WBGene00003704	nhr-114	Y45G5AM.1	ZF - NHR	NF	pNF608		CisBP + wTF2.0	High
WBGene00003705	nhr-115	T27B7.4	ZF - NHR	JA	sjj_T27B7.4		CisBP + wTF2.0	High
WBGene00003706	nhr-116	F09C6.9	ZF - NHR	JA	sjj_F09C6.9		CisBP + wTF2.0	High
WBGene00003707	nhr-117	F16B4.12	ZF - NHR	MV	mv_F16B4.12		CisBP + wTF2.0	High
WBGene00003708	nhr-118	F13A2.8	ZF - NHR	NF	pNF609		CisBP + wTF2.0	High
WBGene00003709	nhr-119	K12H6.1	ZF - NHR	JA	sjj_K12H6.1		CisBP + wTF2.0	High
WBGene00003611	nhr-12	R04B5.4	ZF - NHR	MV	mv_R04B5.4		CisBP + wTF2.0	High
WBGene00003710	nhr-120	C25B8.6	ZF - NHR	JA	sjj_C25B8.6		CisBP + wTF2.0	High
WBGene00003711	nhr-121	E02H9.8	ZF - NHR	JA	sjj_E02H9.8		CisBP + wTF2.0	High
WBGene00003712	nhr-122	Y41D4B.9	ZF - NHR	NF	pNF610		CisBP + wTF2.0	High
WBGene00003713	nhr-123	M02H5.7	ZF - NHR	JA	sjj_M02H5.7		CisBP + wTF2.0	High
WBGene00003714	nhr-124	C17E7.8	ZF - NHR	MV	mv_C17E7.8		CisBP + wTF2.0	High
WBGene00003715	nhr-125	R02D1.1	ZF - NHR	JA	sjj_R02D1.1		CisBP + wTF2.0	High
WBGene00003716	nhr-126	F44C8.10	ZF - NHR	JA	sjj_F44C8.10		CisBP + wTF2.0	High
WBGene00003717	nhr-127	T13F3.3	ZF - NHR	JA	sjj_T13F3.3		CisBP + wTF2.0	High
WBGene00003718	nhr-128	F44C8.5	ZF - NHR	JA	sjj_F44C8.5		CisBP + wTF2.0	High
WBGene00003719	nhr-129	C50B6.14	ZF - NHR	NF	pNF611		CisBP + wTF2.0	High
WBGene00003612	nhr-13	Y5H2B.2	ZF - NHR	JA	sjj_Y5H2B.2		CisBP + wTF2.0	High
WBGene00003720	nhr-130	T01G6.8	ZF - NHR	JA	sjj_T01G6.8		CisBP + wTF2.0	High
WBGene00003721	nhr-131	T01G6.2	ZF - NHR	NF	pNF612		CisBP + wTF2.0	High
WBGene00003722	nhr-132	R11G11.1	ZF - NHR	MV	mv_R11G11.1		CisBP + wTF2.0	High
WBGene00003723	nhr-133	F44C8.8	ZF - NHR	MV	mv_F44C8.8		CisBP + wTF2.0	High
WBGene00003724	nhr-134	F44C8.2	ZF - NHR	JA	sjj_F44C8.2		CisBP + wTF2.0	High
WBGene00003725	nhr-135	VC5.5	ZF - NHR	NF	pNF652		CisBP + wTF2.0	High
WBGene00003726	nhr-136	C13C4.3	ZF - NHR	NF	pNF639		CisBP + wTF2.0	High
WBGene00003727	nhr-137	C56E10.4	ZF - NHR	JA	sjj_C56E10.4		CisBP + wTF2.0	High
WBGene00003728	nhr-138	C28D4.9	ZF - NHR	NF	pNF613		CisBP + wTF2.0	High
WBGene00016365	nhr-139	C33G8.8	ZF - NHR	JA	sjj_C33G8.8		CisBP + wTF2.0	High
WBGene00003613	nhr-14	T01B10.4	ZF - NHR	JA	sjj_T01B10.4		CisBP + wTF2.0	High
WBGene00016366	nhr-140	C33G8.9	ZF - NHR	JA	sjj_C33G8.9		CisBP + wTF2.0	High
WBGene00017787	nhr-141	F25E5.6	ZF - NHR	MV	mv_F25E5.6		CisBP + wTF2.0	High
WBGene00018430	nhr-142	F44E7.8	ZF - NHR	JA	sjj_F44E7.8		CisBP + wTF2.0	High
WBGene00019116	nhr-143	F59E11.11	ZF - NHR	JA	sjj_F59E11.11		CisBP + wTF2.0	High
WBGene00012703	nhr-145	Y39B6A.47	ZF - NHR	NF	pNF614		CisBP + wTF2.0	High
WBGene00045255	nhr-146	Y41D4B.27	ZF - NHR	NF	pNF546		New CisBP	High
WBGene00015395	nhr-147	C03G6.8	ZF - NHR	JA	sjj_C03G6.8		CisBP + wTF2.0	High
WBGene00015396	nhr-148	C03G6.10	ZF - NHR	JA	sjj_C03G6.10		CisBP + wTF2.0	High
WBGene00015397	nhr-149	C03G6.12	ZF - NHR	JA	sjj_C03G6.12		CisBP + wTF2.0	High
WBGene00003614	nhr-15	F33E11.1	ZF - NHR	MV	mv_F33E11.1		CisBP + wTF2.0	High
WBGene00007367	nhr-150	C06B8.1	ZF - NHR	MV	mv_C06B8.1		CisBP + wTF2.0	High
WBGene00015705	nhr-152	C12D5.2	ZF - NHR	MV	mv_C12D5.2		CisBP + wTF2.0	High
WBGene00007546	nhr-153	C13C4.1	ZF - NHR	JA	sjj_C13C4.1		CisBP + wTF2.0	High
WBGene00007547	nhr-154	C13C4.2	ZF - NHR	JA	sjj_C13C4.2		CisBP + wTF2.0	High
WBGene00015758	nhr-155	C14C6.4	ZF - NHR	JA	sjj_C14C6.4		CisBP + wTF2.0	High
WBGene00015897	nhr-156	C17E7.1	ZF - NHR	MV	mv_C17E7.1		CisBP + wTF2.0	High
WBGene00015900	nhr-157	C17E7.5	ZF - NHR	JA	sjj_C17E7.5		CisBP + wTF2.0	High
WBGene00015901	nhr-158	C17E7.6	ZF - NHR	JA	sjj_C17E7.6		CisBP + wTF2.0	High
WBGene00015902	nhr-159	C17E7.7	ZF - NHR	JA	sjj_C17E7.7		CisBP + wTF2.0	High
WBGene00003615	nhr-16	T12C9.6	ZF - NHR	MV	mv_T12C9.6		CisBP + wTF2.0	High
WBGene00016364	nhr-161	C33G8.7	ZF - NHR	NF	pNF616		CisBP + wTF2.0	High
WBGene00016367	nhr-162	C33G8.10	ZF - NHR	MV	mv_C33G8.10		CisBP + wTF2.0	High
WBGene00016368	nhr-163	C33G8.12	ZF - NHR	JA	sjj_C33G8.12		CisBP + wTF2.0	High
WBGene00008056	nhr-164	C41G6.5	ZF - NHR	MV	mv_C41G6.5		CisBP + wTF2.0	High
WBGene00008158	nhr-165	C47F8.2	ZF - NHR	JA	sjj_C47F8.2		CisBP + wTF2.0	High
WBGene00016772	nhr-166	C49D10.2	ZF - NHR	JA	sjj_C49D10.2		CisBP + wTF2.0	High
WBGene00008208	nhr-167	C49F5.4	ZF - NHR	NF	pNF645		CisBP + wTF2.0	High
WBGene00008221	nhr-168	C50B6.8	ZF - NHR	JA	sjj_C50B6.8		CisBP + wTF2.0	High
WBGene00008289	nhr-169	C54C8.1	ZF - NHR	JA	sjj_C54C8.1		CisBP + wTF2.0	High
WBGene00003616	nhr-17	C02B4.2	ZF - NHR	JA	sjj_C02B4.2		CisBP + wTF2.0	High
WBGene00008309	nhr-170	C54E10.5	ZF - NHR	JA	sjj_C54E10.5		CisBP + wTF2.0	High
WBGene00016926	nhr-171	C54F6.8	ZF - NHR	NF	pNF646		CisBP + wTF2.0	High
WBGene00016927	nhr-172	C54F6.9	ZF - NHR	JA	sjj_C54F6.9		CisBP + wTF2.0	High
WBGene00016975	nhr-173	C56E10.1	ZF - NHR	JA	sjj_C56E10.1		CisBP + wTF2.0	High
WBGene00008474	nhr-174	E03H4.6	ZF - NHR	JA	sjj_E03H4.6		CisBP + wTF2.0	High
WBGene00008630	nhr-175	F09F3.10	ZF - NHR	JA	sjj_F09F3.10		CisBP + wTF2.0	High
WBGene00008830	nhr-176	F14H3.11	ZF - NHR	MV	mv_F14H3.11		CisBP + wTF2.0	High
WBGene00017503	nhr-177	F16B4.1	ZF - NHR	NF	pNF647		CisBP + wTF2.0	High
WBGene00017510	nhr-178	F16B4.9	ZF - NHR	JA	sjj_F16B4.9		CisBP + wTF2.0	High
WBGene00017512	nhr-179	F16B4.11	ZF - NHR	MV	mv_F16B4.11		CisBP + wTF2.0	High
WBGene00003617	nhr-18	F44C8.3	ZF - NHR	JA	sjj_F44C8.3		CisBP + wTF2.0	High
WBGene00017961	nhr-180	F31F4.12	ZF - NHR	JA	sjj_F31F4.12		CisBP + wTF2.0	High
WBGene00018189	nhr-181	F38H12.3	ZF - NHR	MV	mv_F38H12.3		CisBP + wTF2.0	High
WBGene00018265	nhr-182	F41B5.9	ZF - NHR	JA	sjj_F41B5.9		CisBP + wTF2.0	High
WBGene00018266	nhr-183	F41B5.10	ZF - NHR	MV	mv_F41B5.10		CisBP + wTF2.0	High
WBGene00018415	nhr-184	F44C8.9	ZF - NHR	JA	sjj_F44C8.9		CisBP + wTF2.0	High
WBGene00018539	nhr-185	F47C10.1	ZF - NHR	JA	sjj_F47C10.1		CisBP + wTF2.0	High
WBGene00018541	nhr-186	F47C10.3	ZF - NHR	JA	sjj_F47C10.3		CisBP + wTF2.0	High
WBGene00018542	nhr-187	F47C10.4	ZF - NHR	JA	sjj_F47C10.4		CisBP + wTF2.0	High
WBGene00018544	nhr-188	F47C10.7	ZF - NHR	JA	sjj_F47C10.7		CisBP + wTF2.0	High
WBGene00018545	nhr-189	F47C10.8	ZF - NHR	NF	pNF617		CisBP + wTF2.0	High
WBGene00003618	nhr-19	E02H1.7	ZF - NHR	JA	sjj_E02H1.7		CisBP + wTF2.0	High
WBGene00018622	nhr-190	F48G7.11	ZF - NHR	JA	sjj_F48G7.11		CisBP + wTF2.0	High
WBGene00010180	nhr-192	F57A8.5	ZF - NHR	JA	sjj_F57A8.5		CisBP + wTF2.0	High
WBGene00010215	nhr-193	F57G8.6	ZF - NHR	JA	sjj_F57G8.6		CisBP + wTF2.0	High
WBGene00019115	nhr-195	F59E11.10	ZF - NHR	JA	sjj_F59E11.10		Manually curated from wTF2.0	High
WBGene00010600	nhr-196	K06B4.5	ZF - NHR	MV	mv_K06B4.5		CisBP + wTF2.0	High
WBGene00010602	nhr-197	K06B4.7	ZF - NHR	JA	sjj_K06B4.7		CisBP + wTF2.0	High
WBGene00010603	nhr-198	K06B4.8	ZF - NHR	MV	mv_K06B4.8		CisBP + wTF2.0	High
WBGene00010604	nhr-199	K06B4.10	ZF - NHR	JA	sjj_K06B4.10		CisBP + wTF2.0	High
WBGene00003601	nhr-2	C32F10.6	ZF - NHR	JA	sjj_C32F10.6		CisBP + wTF2.0	High
WBGene00003619	nhr-20	F43C1.4	ZF - NHR	MV	mv_F43C1.4		CisBP + wTF2.0	High
WBGene00019741	nhr-201	M02H5.3	ZF - NHR	NF	pNF643		CisBP + wTF2.0	High
WBGene00019742	nhr-202	M02H5.4	ZF - NHR	NF	pNF582		CisBP + wTF2.0	High
WBGene00019743	nhr-203	M02H5.5	ZF - NHR	NF	pNF618		CisBP + wTF2.0	High
WBGene00019816	nhr-204	R02C2.4	ZF - NHR	JA	sjj_R02C2.4		CisBP + wTF2.0	High
WBGene00011002	nhr-205	R04B5.3	ZF - NHR	MV	mv_R04B5.3		CisBP + wTF2.0	High
WBGene00011097	nhr-206	R07B7.13	ZF - NHR	JA	sjj_R07B7.13		CisBP + wTF2.0	High
WBGene00011098	nhr-207	R07B7.14	ZF - NHR	JA	sjj_R07B7.14		CisBP + wTF2.0	High
WBGene00011099	nhr-208	R07B7.15	ZF - NHR	JA	sjj_R07B7.15		CisBP + wTF2.0	High
WBGene00011100	nhr-209	R07B7.16	ZF - NHR	NF	pNF640		CisBP + wTF2.0	High
WBGene00003620	nhr-21	F21D12.1	ZF - NHR	MV	mv_F21D12.1		CisBP + wTF2.0	High
WBGene00020015	nhr-210	R11G11.12	ZF - NHR	NF	pNF635		CisBP + wTF2.0	High
WBGene00020152	nhr-211	T01G6.5	ZF - NHR	MV	mv_T01G6.5		CisBP + wTF2.0	High
WBGene00020153	nhr-212	T01G6.6	ZF - NHR	JA	sjj_T01G6.6		CisBP + wTF2.0	High
WBGene00011520	nhr-213	T06C12.13	ZF - NHR	MV	mv_T06C12.13		CisBP + wTF2.0	High
WBGene00011566	nhr-214	T07C5.3	ZF - NHR	JA	sjj_T07C5.3		CisBP + wTF2.0	High
WBGene00011567	nhr-215	T07C5.4	ZF - NHR	JA	sjj_T07C5.4		CisBP + wTF2.0	High
WBGene00020385	nhr-216	T09D3.4	ZF - NHR	JA	sjj_T09D3.4		CisBP + wTF2.0	High
WBGene00011651	nhr-217	T09E11.2	ZF - NHR	JA	sjj_T09E11.2		CisBP + wTF2.0	High
WBGene00011750	nhr-218	T13F3.2	ZF - NHR	JA	sjj_T13F3.2		CisBP + wTF2.0	High
WBGene00020555	nhr-219	T19A5.5	ZF - NHR	JA	sjj_T19A5.5		CisBP + wTF2.0	High
WBGene00003621	nhr-22	K06A1.4	ZF - NHR	JA	sjj_K06A1.4		CisBP + wTF2.0	High
WBGene00020591	nhr-220	T19H12.8	ZF - NHR	JA	sjj_T19H12.8		CisBP + wTF2.0	High
WBGene00020748	nhr-221	T24A6.8	ZF - NHR	JA	sjj_T24A6.8		CisBP + wTF2.0	High
WBGene00020750	nhr-222	T24A6.11	ZF - NHR	JA	sjj_T24A6.11		CisBP + wTF2.0	High
WBGene00012050	nhr-223	T26E4.8	ZF - NHR	JA	sjj_T26E4.8		CisBP + wTF2.0	High
WBGene00020849	nhr-225	T27B7.2	ZF - NHR	JA	sjj_T27B7.2		CisBP + wTF2.0	High
WBGene00020850	nhr-226	T27B7.3	ZF - NHR	JA	sjj_T27B7.3		CisBP + wTF2.0	High
WBGene00020851	nhr-227	T27B7.5	ZF - NHR	JA	sjj_T27B7.5		Manually curated from wTF2.0	High
WBGene00020852	nhr-228	T27B7.6	ZF - NHR	MV	mv_T27B7.6		CisBP + wTF2.0	High
WBGene00013795	nhr-229	Y116A8C.18	ZF - NHR	JA	sjj_Y116A8C.18		Manually curated from wTF2.0	High
WBGene00003622	nhr-23	C01H6.5	ZF - NHR	JA	sjj_C01H6.5		CisBP + wTF2.0	High
WBGene00012446	nhr-230	Y17D7A.1	ZF - NHR	JA	sjj_Y17D7A.1		CisBP + wTF2.0	High
WBGene00012449	nhr-231	Y17D7B.1	ZF - NHR	JA	sjj_Y17D7B.1		CisBP + wTF2.0	High
WBGene00012494	nhr-232	Y22F5A.1	ZF - NHR	JA	sjj_Y22F5A.1		CisBP + wTF2.0	High
WBGene00006471	nhr-233	Y32B12B.6	ZF - NHR	JA	sjj_Y32B12B.6		CisBP + wTF2.0	High
WBGene00012596	nhr-234	Y38E10A.18	ZF - NHR	MV	mv_Y38E10A.18		CisBP + wTF2.0	High
WBGene00021417	nhr-236	Y38F2AL.5	ZF - NHR	MV	mv_Y38F2AL.5		New CisBP	High
WBGene00021610	nhr-237	Y46H3D.6	ZF - NHR	MV	mv_Y46H3D.6		CisBP + wTF2.0	High
WBGene00021611	nhr-238	Y46H3D.7	ZF - NHR	NF	pNF619		CisBP + wTF2.0	High
WBGene00021848	nhr-239	Y54F10AM.1	ZF - NHR	NF	pNF620		CisBP + wTF2.0	High
WBGene00013483	nhr-241	Y69H2.8	ZF - NHR	NF	pNF621		CisBP + wTF2.0	High
WBGene00022097	nhr-242	Y69A2AR.26	ZF - NHR	NF	pNF641		CisBP + wTF2.0	High
WBGene00013584	nhr-243	Y80D3A.4	ZF - NHR	MV	mv_Y80D3A.4		CisBP + wTF2.0	High
WBGene00014189	nhr-245	ZK1025.10	ZF - NHR	NF	pNF649	nhr-73 and nhr-74	CisBP + wTF2.0	High
WBGene00014193	nhr-247	ZK1037.5	ZF - NHR	JA	sjj_ZK1037.5		CisBP + wTF2.0	High
WBGene00013940	nhr-248	ZK218.6	ZF - NHR	NF	pNF637		CisBP + wTF2.0	High
WBGene00003623	nhr-25	F11C1.6	ZF - NHR	JA	sjj_F11C1.6		CisBP + wTF2.0	High
WBGene00022755	nhr-250	ZK488.1	ZF - NHR	JA	sjj_ZK488.1		CisBP + wTF2.0	High
WBGene00022756	nhr-251	ZK488.4	ZF - NHR	JA	sjj_ZK488.4		CisBP + wTF2.0	High
WBGene00022637	nhr-252	ZK6.2	ZF - NHR	NF	pNF638		CisBP + wTF2.0	High
WBGene00022639	nhr-253	ZK6.4	ZF - NHR	MV	mv_ZK6.4		CisBP + wTF2.0	High
WBGene00022640	nhr-254	ZK6.5	ZF - NHR	JA	sjj_ZK6.5		CisBP + wTF2.0	High
WBGene00014068	nhr-255	ZK678.2	ZF - NHR	NF	pNF622		CisBP + wTF2.0	High
WBGene00022805	nhr-256	ZK697.2	ZF - NHR	JA	sjj_ZK697.2		CisBP + wTF2.0	High
WBGene00015869	nhr-257	C17A2.1	ZF - NHR	JA	sjj_C17A2.1		CisBP + wTF2.0	High
WBGene00016126	nhr-258	C26B2.4	ZF - NHR	MV	mv_C26B2.4		CisBP + wTF2.0	High
WBGene00011568	nhr-26	T07C5.5	ZF - NHR	JA	sjj_T07C5.5		CisBP + wTF2.0	High
WBGene00016517	nhr-260	C38C3.9	ZF - NHR	JA	sjj_C38C3.9		CisBP + wTF2.0	High
WBGene00016777	nhr-261	C49D10.9	ZF - NHR	NF	pNF632	nhr-257	CisBP + wTF2.0	High
WBGene00008619	nhr-262	F09C6.8	ZF - NHR	JA	sjj_F09C6.8		CisBP + wTF2.0	High
WBGene00008778	nhr-264	F14A5.1	ZF - NHR	NF	pNF633	nhr-267	CisBP + wTF2.0	High
WBGene00009608	nhr-265	F41D3.3	ZF - NHR	JA	sjj_F41D3.3		CisBP + wTF2.0	High
WBGene00018993	nhr-266	F56H1.2	ZF - NHR	JA	sjj_F56H1.2		CisBP + wTF2.0	High
WBGene00010410	nhr-267	H22D14.1	ZF - NHR	JA	sjj_H22D14.1		CisBP + wTF2.0	High
WBGene00010601	nhr-268	K06B4.6	ZF - NHR	JA	sjj_K06B4.6		CisBP + wTF2.0	High
WBGene00011150	nhr-269	R08H2.9	ZF - NHR	JA	sjj_R08H2.9		CisBP + wTF2.0	High
WBGene00008901	nhr-27	F16H9.2	ZF - NHR	JA	sjj_F16H9.2		CisBP + wTF2.0	High
WBGene00020062	nhr-270	R13D11.8	ZF - NHR	JA	sjj_R13D11.8		CisBP + wTF2.0	High
WBGene00011396	nhr-271	T03E6.3	ZF - NHR	JA	sjj_T03E6.3		CisBP + wTF2.0	High
WBGene00011565	nhr-272	T07C5.2	ZF - NHR	JA	sjj_T07C5.2		CisBP + wTF2.0	High
WBGene00020460	nhr-273	T12C9.1	ZF - NHR	NF	pNF561		CisBP + wTF2.0	High
WBGene00021522	nhr-274	Y41D4B.21	ZF - NHR	NF	pNF623		CisBP + wTF2.0	High
WBGene00021163	nhr-275	Y5H2A.2	ZF - NHR	NF	pNF624		CisBP + wTF2.0	High
WBGene00013512	nhr-276	Y71A12C.1	ZF - NHR	JA	sjj_Y71A12C.1		CisBP + wTF2.0	High
WBGene00022374	nhr-277	Y94H6A.1	ZF - NHR	MV	mv_Y94H6A.1		CisBP + wTF2.0	High
WBGene00003624	nhr-28	C11G6.4	ZF - NHR	MV	mv_C11G6.4		CisBP + wTF2.0	High
WBGene00008884	nhr-281	F16B12.8	ZF - NHR	JA	sjj_F16B12.8		CisBP + wTF2.0	High
WBGene00010186	nhr-283	F57A10.6	ZF - NHR	NF	pNF625		CisBP + wTF2.0	High
WBGene00012056	nhr-285	T26E4.16	ZF - NHR	NF	pNF626		CisBP + wTF2.0	High
WBGene00044699	nhr-286	VC5.6	ZF - NHR	NF	pNF547		New CisBP	High
WBGene00016233	nhr-290	C29G2.5	ZF - NHR	NF	pNF642		CisBP + wTF2.0	High
WBGene00045515	nhr-291	ZK1037.13	ZF - NHR	NF	pNF548		New CisBP	High
WBGene00003602	nhr-3	H01A20.1	ZF - NHR	MV	mv_H01A20.1		CisBP + wTF2.0	High
WBGene00016091	nhr-30	C25E10.1	ZF - NHR	JA	sjj_C25E10.1		CisBP + wTF2.0	High
WBGene00003625	nhr-31	C26B2.3	ZF - NHR	MV	mv_C26B2.3		CisBP + wTF2.0	High
WBGene00003626	nhr-32	K08H2.8	ZF - NHR	MV	mv_K08H2.8		CisBP + wTF2.0	High
WBGene00003627	nhr-34	F58G6.5	ZF - NHR	MV	mv_F58G6.5		CisBP + wTF2.0	High
WBGene00003628	nhr-35	C07A12.3	ZF - NHR	JA	sjj_C07A12.3		CisBP + wTF2.0	High
WBGene00017198	nhr-36	F07C3.10	ZF - NHR	NF	pNF627		CisBP + wTF2.0	High
WBGene00018412	nhr-37	F44C4.2	ZF - NHR	JA	sjj_F44C4.2		CisBP + wTF2.0	High
WBGene00003629	nhr-38	K01H12.3	ZF - NHR	JA	sjj_K01H12.3		CisBP + wTF2.0	High
WBGene00018404	nhr-39	F44A2.4	ZF - NHR	JA	sjj_F44A2.4		CisBP + wTF2.0	High
WBGene00003603	nhr-4	F32B6.1	ZF - NHR	JA	sjj_F32B6.1		CisBP + wTF2.0	High
WBGene00003630	nhr-40	T03G6.2	ZF - NHR	MV	mv_T03G6.2		CisBP + wTF2.0	High
WBGene00022423	nhr-41	Y104H12A.1	ZF - NHR	NF	pNF644		CisBP + wTF2.0	High
WBGene00003632	nhr-42	C33G8.6	ZF - NHR	NF	pNF648		CisBP + wTF2.0	High
WBGene00003633	nhr-43	C29E6.5	ZF - NHR	MV	mv_C29E6.5		CisBP + wTF2.0	High
WBGene00003634	nhr-44	T19A5.4	ZF - NHR	JA	sjj_T19A5.4		CisBP + wTF2.0	High
WBGene00003635	nhr-45	F16H11.5	ZF - NHR	JA	sjj_F16H11.5		CisBP + wTF2.0	High
WBGene00003636	nhr-46	C45E5.6	ZF - NHR	MV	mv_C45E5.6		CisBP + wTF2.0	High
WBGene00003637	nhr-47	C24G6.4	ZF - NHR	JA	sjj_C24G6.4		CisBP + wTF2.0	High
WBGene00003638	nhr-48	ZK662.3	ZF - NHR	NF	pNF628		CisBP + wTF2.0	High
WBGene00003639	nhr-49	K10C3.6	ZF - NHR	JA	sjj_K10C3.6		CisBP + wTF2.0	High
WBGene00003604	nhr-5	Y73F8A.21	ZF - NHR	NF	pNF629		CisBP + wTF2.0	High
WBGene00003640	nhr-50	C06C6.5	ZF - NHR	JA	sjj_C06C6.5		CisBP + wTF2.0	High
WBGene00003641	nhr-51	K06B4.1	ZF - NHR	JA	sjj_K06B4.1		CisBP + wTF2.0	High
WBGene00003642	nhr-52	K06B4.2	ZF - NHR	NF	pNF630		CisBP + wTF2.0	High
WBGene00003643	nhr-53	K06B4.11	ZF - NHR	MV	mv_K06B4.11	nhr-199	CisBP + wTF2.0	High
WBGene00003644	nhr-54	F36D3.2	ZF - NHR	JA	sjj_F36D3.2		CisBP + wTF2.0	High
WBGene00003645	nhr-55	T01G6.7	ZF - NHR	JA	sjj_T01G6.7		CisBP + wTF2.0	High
WBGene00003646	nhr-56	F44C8.6	ZF - NHR	JA	sjj_F44C8.6		CisBP + wTF2.0	High
WBGene00003647	nhr-57	T05B4.2	ZF - NHR	JA	sjj_T05B4.2		CisBP + wTF2.0	High
WBGene00003648	nhr-58	R11G11.2	ZF - NHR	JA	sjj_R11G11.2		CisBP + wTF2.0	High
WBGene00003649	nhr-59	T27B7.1	ZF - NHR	JA	sjj_T27B7.1		CisBP + wTF2.0	High
WBGene00003605	nhr-6	C48D5.1	ZF - NHR	JA	sjj_C48D5.1		CisBP + wTF2.0	High
WBGene00003650	nhr-60	F57A10.5	ZF - NHR	JA	sjj_F57A10.5		CisBP + wTF2.0	High
WBGene00003651	nhr-61	W01D2.2	ZF - NHR	NF	pNF545		CisBP + wTF2.0	High
WBGene00003652	nhr-62	Y67A6A.2	ZF - NHR	JA	sjj_Y67A6A.2		CisBP + wTF2.0	High
WBGene00003653	nhr-63	C06C6.4	ZF - NHR	MV	mv_C06C6.4		CisBP + wTF2.0	High
WBGene00003654	nhr-64	C45E1.1	ZF - NHR	JA	sjj_C45E1.1		CisBP + wTF2.0	High
WBGene00003655	nhr-65	Y17D7A.3	ZF - NHR	MV	mv_Y17D7A.3		CisBP + wTF2.0	High
WBGene00003656	nhr-66	T09A12.4	ZF - NHR	JA	sjj_T09A12.4		CisBP + wTF2.0	High
WBGene00003657	nhr-67	C08F8.8	ZF - NHR	JA	sjj_C08F8.8		CisBP + wTF2.0	High
WBGene00003658	nhr-68	H12C20.3	ZF - NHR	JA	sjj_H12C20.3		CisBP + wTF2.0	High
WBGene00003659	nhr-69	T23H4.2	ZF - NHR	MV	mv_T23H4.2		CisBP + wTF2.0	High
WBGene00003606	nhr-7	F54D1.4	ZF - NHR	JA	sjj_F54D1.4		CisBP + wTF2.0	High
WBGene00003660	nhr-70	Y51A2D.17	ZF - NHR	MV	mv_Y51A2D.17		CisBP + wTF2.0	High
WBGene00003661	nhr-71	K11E4.5	ZF - NHR	JA	sjj_K11E4.5		CisBP + wTF2.0	High
WBGene00003662	nhr-72	C17A2.8	ZF - NHR	JA	sjj_C17A2.8		CisBP + wTF2.0	High
WBGene00003663	nhr-73	C27C7.4	ZF - NHR	MV	mv_C27C7.4		CisBP + wTF2.0	High
WBGene00003664	nhr-74	C27C7.3	ZF - NHR	JA	sjj_C27C7.3		CisBP + wTF2.0	High
WBGene00003665	nhr-75	C49D10.6	ZF - NHR	JA	sjj_C49D10.6		CisBP + wTF2.0	High
WBGene00015497	nhr-76	C05G6.1	ZF - NHR	JA	sjj_C05G6.1		CisBP + wTF2.0	High
WBGene00003667	nhr-77	T15D6.6	ZF - NHR	JA	sjj_T15D6.6		CisBP + wTF2.0	High
WBGene00003668	nhr-78	F36A4.14	ZF - NHR	NF	pNF634		CisBP + wTF2.0	High
WBGene00003669	nhr-79	T26H2.9	ZF - NHR	MV	mv_T26H2.9		CisBP + wTF2.0	High
WBGene00003607	nhr-8	F33D4.1	ZF - NHR	JA	sjj_F33D4.1		CisBP + wTF2.0	High
WBGene00003670	nhr-80	H10E21.3	ZF - NHR	JA	sjj_H10E21.3		CisBP + wTF2.0	High
WBGene00003671	nhr-81	C47F8.8	ZF - NHR	JA	sjj_C47F8.8		CisBP + wTF2.0	High
WBGene00003672	nhr-82	F41D3.1	ZF - NHR	JA	sjj_F41D3.1		CisBP + wTF2.0	High
WBGene00003673	nhr-83	F48G7.3	ZF - NHR	JA	sjj_F48G7.3		CisBP + wTF2.0	High
WBGene00003674	nhr-84	T06C12.7	ZF - NHR	MV	mv_T06C12.7		CisBP + wTF2.0	High
WBGene00003675	nhr-85	W05B5.3	ZF - NHR	JA	sjj_W05B5.3		CisBP + wTF2.0	High
WBGene00003676	nhr-86	Y40B10A.8	ZF - NHR	NF	pNF631		CisBP + wTF2.0	High
WBGene00003677	nhr-87	Y41D4B.7	ZF - NHR	JA	sjj_Y41D4B.7		CisBP + wTF2.0	High
WBGene00003678	nhr-88	K08A2.5	ZF - NHR	JA	sjj_K08A2.5		CisBP + wTF2.0	High
WBGene00003679	nhr-89	E03H4.13	ZF - NHR	JA	sjj_E03H4.13		CisBP + wTF2.0	High
WBGene00003608	nhr-9	ZK418.1	ZF - NHR	MV	mv_ZK418.1		CisBP + wTF2.0	High
WBGene00003680	nhr-90	ZK488.2	ZF - NHR	JA	sjj_ZK488.2		CisBP + wTF2.0	High
WBGene00003681	nhr-91	Y15E3A.1	ZF - NHR	MV	mv_Y15E3A.1		CisBP + wTF2.0	High
WBGene00003682	nhr-92	Y41D4B.8	ZF - NHR	JA	sjj_Y41D4B.8		CisBP + wTF2.0	High
WBGene00003684	nhr-94	C12D5.8	ZF - NHR	JA	sjj_C12D5.8		CisBP + wTF2.0	High
WBGene00003685	nhr-95	Y39B6A.17	ZF - NHR	JA	sjj_Y39B6A.17		CisBP + wTF2.0	High
WBGene00003686	nhr-96	F44C8.11	ZF - NHR	JA	sjj_F44C8.11		CisBP + wTF2.0	High
WBGene00003687	nhr-97	H27C11.1	ZF - NHR	JA	sjj_H27C11.1		CisBP + wTF2.0	High
WBGene00003688	nhr-98	M02H5.6	ZF - NHR	MV	mv_M02H5.6		CisBP + wTF2.0	High
WBGene00003689	nhr-99	M02H5.1	ZF - NHR	MV	mv_M02H5.1		CisBP + wTF2.0	High
WBGene00003779	nob-1	Y75B8A.2	HD	JA	sjj_Y75B8A.2		CisBP + wTF2.0	High
WBGene00017664	npax-1	F21D12.5	PRD-NPAX	JA	sjj_F21D12.5		CisBP + wTF2.0	High
WBGene00018591	npax-2	F48B9.5	PRD-NPAX	MV	mv_F48B9.5		CisBP + wTF2.0	High
WBGene00011257	npax-3	R13.2	PRD-NPAX	JA	sjj_R13.2		CisBP + wTF2.0	High
WBGene00007496	npax-4	C09G9.7	PRD-NPAX	MV	mv_C09G9.7		CisBP + wTF2.0	High
WBGene00044508	nsy-7	C18F3.4	HD	NF	pNF519		New CisBP	High
WBGene00003845	odd-1	B0280.4	ZF - C2H2	JA	sjj_B0280.4		CisBP + wTF2.0	High
WBGene00003846	odd-2	C34H3.2	ZF - C2H2	JA	sjj_C34H3.2		CisBP + wTF2.0	High
WBGene00003854	odr-7	T18D3.2	ZF - NHR	JA	sjj_T18D3.2		CisBP + wTF2.0	High
WBGene00003909	pag-3	F45B8.4	ZF - C2H2	MV	mv_F45B8.4		CisBP + wTF2.0	High
WBGene00003912	pal-1	C38D4.6	HD	JA	sjj_C38D4.6		CisBP + wTF2.0	High
WBGene00003933	pat-9	T27B1.2	ZF - C2H2	JA	sjj_T27B1.2		CisBP + wTF2.0	High
WBGene00003937	pax-1	K07C11.1	PRD-FULL	JA	sjj_K07C11.1		CisBP + wTF2.0	High
WBGene00003938	pax-2	K06B9.5	PRD-FULL	NF	pNF534		CisBP + wTF2.0	High
WBGene00003939	pax-3	F27E5.2	HD	JA	sjj_F27E5.2		CisBP + wTF2.0	High
WBGene00007042	pbrm-1	C26C6.1	ZF - C2H2	JA	sjj_C26C6.1		CisBP + wTF2.0	High
WBGene00003968	peb-1	T14F9.4	ZF - FLYWCH	JA	sjj_T14F9.4		Manually curated from wTF2.0	High
WBGene00003976	pes-1	T28H11.4	WH - FH	JA	sjj_T28H11.4		CisBP + wTF2.0	High
WBGene00004011	pha-2	M6.3	HD	NF	pNF528		CisBP + wTF2.0	High
WBGene00004013	pha-4	F38A6.1	WH - FH	JA	sjj_F38A6.1		CisBP + wTF2.0	High
WBGene00004024	php-3	Y75B8A.1	HD	JA	sjj_Y75B8A.1		CisBP + wTF2.0	High
WBGene00013150	pole-4	Y53F4B.3	CBF	JA	sjj_Y53F4B.3		Manually curated from wTF2.0	Medium
WBGene00004077	pop-1	W10C8.2	HMG box	JA	sjj_W10C8.2		CisBP + wTF2.0	High
WBGene00004096	pqm-1	F40F8.7	ZF - C2H2	JA	sjj_F40F8.7		Manually curated from wTF2.0	Medium
WBGene00004111	pqn-21	C37A2.5	ZF - C2H2	MV	mv_C37A2.5		Manually curated from wTF2.0	Medium
WBGene00000448	pros-1	K12H4.1	HD	JA	sjj_K12H4.1		CisBP + wTF2.0	High
WBGene00011505	pzf-1	T05G11.1	ZF - C2H2	JA	sjj_T05G11.1		CisBP + wTF2.0	High
WBGene00019824	R02D3.7	R02D3.7	ZF - C2H2	JA	sjj_R02D3.7		Manually curated from wTF2.0	Medium
WBGene00019878	R05D3.3	R05D3.3	ZF - C2H2	MV	mv_R05D3.3		Manually curated from wTF2.0	Medium
WBGene00011113	R07E5.5	R07E5.5	ZF - C2H2	JA	sjj_R07E5.5		CisBP + wTF2.0	High
WBGene00011206	R10E4.11	R10E4.11	ZF - C2H2	JA	sjj_R10E4.11		Manually curated from wTF2.0	High
WBGene00020093	R144.3	R144.3	ZF - C2H2	NF	pNF586		Manually curated from wTF2.0	Medium
WBGene00020111	R151.8	R151.8	MYB	NF	pNF544		Manually curated from wTF2.0	Medium
WBGene00021538	rabs-5	Y42H9AR.3	ZF - C2H2	MV	mv_Y42H9AR.3		Manually curated from wTF2.0	Medium
WBGene00004319	rbr-2	ZK593.4	ARID/BRIGHT	JA	sjj_ZK593.4		CisBP + wTF2.0	High
WBGene00022278	rcor-1	Y74C9A.4	ZF - GATA	MV	mv_Y74C9A.4		CisBP + wTF2.0	High
WBGene00004334	ref-1	T01E8.2	bHLH	JA	sjj_T01E8.2		CisBP + wTF2.0	High
WBGene00004335	ref-2	C47C12.3	ZF - C2H2	MV	mv_C47C12.3		CisBP + wTF2.0	High
WBGene00008683	repo-1	F11A10.2	ZF - C2H2	JA	sjj_F11A10.2		Manually curated from wTF2.0	Medium
WBGene00004393	rnt-1	B0414.2	RNT	JA	sjj_B0414.2		CisBP + wTF2.0	High
WBGene00009508	row-1	F37D6.2	ZF - C2H2	MV	mv_F37D6.2		Manually curated from wTF2.0	Medium
WBGene00010012	saeg-1	F53H10.2	ZF - C2H2	NF	pNF578		CisBP + wTF2.0	High
WBGene00011964	saeg-2	T23G5.6	AT Hook	JA	sjj_T23G5.6		Manually curated from wTF2.0	Medium
WBGene00004735	sbp-1	Y47D3B.7	bHLH	JA	sjj_Y47D3B.7		CisBP + wTF2.0	High
WBGene00016948	scrt-1	C55C2.1	ZF - C2H2	NF	pNF657		CisBP + wTF2.0	High
WBGene00004745	sdc-1	F52E10.1	ZF - C2H2	JA	sjj_F52E10.1		CisBP + wTF2.0	High
WBGene00017406	sdz-12	F12E12.5	ZF - C2H2	MV	mv_F12E12.5		CisBP + wTF2.0	High
WBGene00014131	sdz-38	ZK892.7	ZF - C2H2	JA	sjj_ZK892.7		Manually curated from wTF2.0	Medium
WBGene00004750	sea-1	F19B10.9	T-box	JA	sjj_F19B10.9		CisBP + wTF2.0	High
WBGene00004751	sea-2	K10G6.3	ZF - C2H2	JA	sjj_K10G6.3		Manually curated from wTF2.0	Medium
WBGene00004771	sem-2	C32E12.5	HMG box	NF	pNF535		CisBP + wTF2.0	High
WBGene00004773	sem-4	F15C11.1	ZF - C2H2	JA	sjj_F15C11.1		CisBP + wTF2.0	High
WBGene00004786	sex-1	F44A6.2	ZF - NHR	JA	sjj_F44A6.2		CisBP + wTF2.0	High
WBGene00020961	sknr-1	W02H5.7	bZIP	JA	sjj_W02H5.7		CisBP + wTF2.0	High
WBGene00013350	slr-2	Y59A8B.13	ZF - C2H2	NF	pNF588		CisBP + wTF2.0	High
WBGene00004856	sma-2	ZK370.2	MH1	MV	mv_ZK370.2		CisBP + wTF2.0	High
WBGene00004857	sma-3	R13F6.9	MH1	MV	mv_R13F6.9		CisBP + wTF2.0	High
WBGene00004858	sma-4	R12B2.1	MH1	NF	pNF541		CisBP + wTF2.0	High
WBGene00004862	sma-9	T05A10.1	ZF - C2H2	NF	pNF597		CisBP + wTF2.0	High
WBGene00019299	snai-1	K02D7.2	ZF - C2H2	NF	pNF658		CisBP + wTF2.0	High
WBGene00001568	snpc-4	F32H2.1	MYB	JA	sjj_F32H2.1		CisBP + wTF2.0	High
WBGene00022794	snu-23	ZK686.4	ZF - C2H2	JA	sjj_ZK686.4		Manually curated from wTF2.0	Medium
WBGene00010868	somi-1	M04G12.4	ZF - C2H2	JA	sjj_M04G12.4		Manually curated from wTF2.0	Medium
WBGene00004949	sox-2	K08A8.2	HMG box	JA	sjj_K08A8.2		CisBP + wTF2.0	High
WBGene00004950	sox-3	F40E10.2	HMG box	JA	sjj_F40E10.2		CisBP + wTF2.0	High
WBGene00015716	sox-4	C12D12.5	HMG box	JA	sjj_C12D12.5		CisBP + wTF2.0	High
WBGene00007732	spe-44	C25G4.4	AT Hook	JA	sjj_C25G4.4		CisBP + wTF2.0	High
WBGene00005006	spr-1	D1014.8	MYB	JA	sjj_D1014.8		CisBP + wTF2.0	High
WBGene00005008	spr-3	C07A12.5	ZF - C2H2	JA	sjj_C07A12.5		Manually curated from wTF2.0	Medium
WBGene00005009	spr-4	C09H6.1	ZF - C2H2	MV	mv_C09H6.1		Manually curated from wTF2.0	High
WBGene00009743	sptf-1	F45H11.1	ZF - C2H2	JA	sjj_F45H11.1		CisBP + wTF2.0	High
WBGene00011926	sptf-2	T22C8.5	ZF - C2H2	JA	sjj_T22C8.5		CisBP + wTF2.0	High
WBGene00012735	sptf-3	Y40B1A.4	ZF - C2H2	JA	sjj_Y40B1A.4		CisBP + wTF2.0	High
WBGene00013111	sta-1	Y51H4A.17	STAT	JA	sjj_Y51H4A.17		CisBP + wTF2.0	High
WBGene00012976	sup-35	Y48A6C.3	ZF - C2H2	JA	sjj_Y48A6C.3		Manually curated from wTF2.0	Medium
WBGene00006342	sup-37	C01B7.1	ZF - C2H2	JA	sjj_C01B7.1		Manually curated from wTF2.0	Medium
WBGene00006462	svh-5	C33A11.4	WH - ETS	JA	sjj_C33A11.4		CisBP + wTF2.0	High
WBGene00004203	swsn-1	Y113G7B.23	MYB	JA	sjj_Y113G7B.23		CisBP + wTF2.0	High
WBGene00022182	swsn-3	Y71H2AM.17	HMG box	JA	sjj_Y71H2AM.17		CisBP + wTF2.0	High
WBGene00007433	swsn-7	C08B11.3	ARID/BRIGHT	NF	pNF488		CisBP + wTF2.0	High
WBGene00044068	syd-9	ZK867.1	ZF - C2H2	MV	mv_ZK867.1		CisBP + wTF2.0	High
WBGene00011547	T06G6.5	T06G6.5	ZF - C2H2	NF	pNF576		Manually curated from wTF2.0	Medium
WBGene00011583	T07D10.3	T07D10.3	ZF - C2H2	JA	sjj_T07D10.3		Manually curated from wTF2.0	Medium
WBGene00020320	T07F8.4	T07F8.4	MYB	MV	mv_T07F8.4		Manually curated from wTF2.0	Medium
WBGene00011626	T08G5.7	T08G5.7	ZF - C2H2	JA	sjj_T08G5.7	This clone has many primary targets	Manually curated from wTF2.0	Medium
WBGene00011824	T18D3.7	T18D3.7	TSC-22/DIP/BUN	JA	sjj_T18D3.7		CisBP + wTF2.0	High
WBGene00020630	T20F7.1	T20F7.1	ZF - C2H2	JA	sjj_T20F7.1		CisBP + wTF2.0	High
WBGene00020635	T20H4.2	T20H4.2	ZF - C2H2	JA	sjj_T20H4.2		Manually curated from wTF2.0	Medium
WBGene00011924	T22C8.3	T22C8.3	ZF - C2H2	JA	sjj_T22C8.3		CisBP + wTF2.0	High
WBGene00011925	T22C8.4	T22C8.4	ZF - C2H2	JA	sjj_T22C8.4		CisBP + wTF2.0	High
WBGene00011956	T23F11.4	T23F11.4	ZF - C2H2	JA	sjj_T23F11.4		Manually curated from wTF2.0	Medium
WBGene00020823	T26A5.8	T26A5.8	CBF	JA	sjj_T26A5.8		Manually curated from wTF2.0	Medium
WBGene00012074	T27A8.2	T27A8.2	WH - FH	JA	sjj_T27A8.2		CisBP + wTF2.0	High
WBGene00006380	tab-1	F31E8.3	HD	JA	sjj_F31E8.3		CisBP + wTF2.0	High
WBGene00006395	taf-11.3	F43D9.5	TBP	MV	mv_F43D9.5		CisBP + wTF2.0	High
WBGene00006445	tag-68	F37D6.6	MH1	JA	sjj_F37D6.6		CisBP + wTF2.0	High
WBGene00006542	tbp-1	T20B12.2	TBP	MV	mv_T20B12.2		New CisBP	High
WBGene00006547	tbx-11	F40H6.4	T-box	JA	sjj_F40H6.4		CisBP + wTF2.0	High
WBGene00006543	tbx-2	F21H11.3	T-box	NF	pNF557		CisBP + wTF2.0	High
WBGene00006549	tbx-30	Y59E9AR.3	T-box	JA	sjj_Y59E9AR.3		CisBP + wTF2.0	High
WBGene00006550	tbx-31	C36C9.2	T-box	JA	sjj_C36C9.2		CisBP + wTF2.0	High
WBGene00006551	tbx-32	ZK380.1	T-box	JA	sjj_ZK380.1		CisBP + wTF2.0	High
WBGene00006552	tbx-33	Y66A7A.8	T-box	JA	sjj_Y66A7A.8		CisBP + wTF2.0	High
WBGene00006553	tbx-34	Y47D3A.10	T-box	MV	mv_Y47D3A.10		CisBP + wTF2.0	High
WBGene00006554	tbx-35	ZK177.10	T-box	JA	sjj_ZK177.10		CisBP + wTF2.0	High
WBGene00006555	tbx-36	ZK829.5	T-box	JA	sjj_ZK829.5		CisBP + wTF2.0	High
WBGene00006556	tbx-37	Y47D3A.12	T-box	NF	pNF553		CisBP + wTF2.0	High
WBGene00006557	tbx-38	C24H11.3	T-box	JA	sjj_C24H11.3		CisBP + wTF2.0	High
WBGene00006558	tbx-39	Y73F8A.16	T-box	MV	mv_Y73F8A.16		CisBP + wTF2.0	High
WBGene00006559	tbx-40	Y73F8A.17	T-box	MV	mv_Y73F8A.17		CisBP + wTF2.0	High
WBGene00006560	tbx-41	T26C11.1	T-box	JA	sjj_T26C11.1		CisBP + wTF2.0	High
WBGene00022000	tbx-42	Y59E9AR.5	T-box	JA	sjj_Y59E9AR.5		CisBP + wTF2.0	High
WBGene00044798	tbx-43	Y46E12A.4	T-box	NF	pNF555		New CisBP	High
WBGene00006544	tbx-7	ZK328.8	T-box	NF	pNF556		CisBP + wTF2.0	High
WBGene00006545	tbx-8	T07C4.2	T-box	JA	sjj_T07C4.2		CisBP + wTF2.0	High
WBGene00006546	tbx-9	T07C4.6	T-box	JA	sjj_T07C4.6		CisBP + wTF2.0	High
WBGene00006577	tlf-1	F39H11.2	TBP	NF	pNF558		New CisBP	High
WBGene00006580	tlp-1	T23G4.1	ZF - C2H2	JA	sjj_T23G4.1		Manually curated from wTF2.0	Medium
WBGene00006604	tra-1	Y47D3A.6	ZF - C2H2	JA	sjj_Y47D3A.6		CisBP + wTF2.0	High
WBGene00018740	tra-4	F53B3.1	ZF - C2H2	JA	sjj_F53B3.1		Manually curated from wTF2.0	Medium
WBGene00006652	ttx-1	Y113G7A.6	HD	NF	pNF533		CisBP + wTF2.0	High
WBGene00006654	ttx-3	C40H5.5	HD	JA	sjj_C40H5.5		CisBP + wTF2.0	High
WBGene00017733	ubxn-1	F23C8.4	ZF - C2H2	JA	sjj_F23C8.4		Manually curated from wTF2.0	Medium
WBGene00006844	unc-120	D1081.2	MADS box	MV	mv_D1081.2		CisBP + wTF2.0	High
WBGene00006853	unc-130	C47G2.2	WH - FH	JA	sjj_C47G2.2		CisBP + wTF2.0	High
WBGene00006743	unc-3	Y16B4A.1	IPT/TIG	JA	sjj_Y16B4A.1		Manually curated from wTF2.0	High
WBGene00006766	unc-30	B0564.10	HD	MV	mv_B0564.10		CisBP + wTF2.0	High
WBGene00006775	unc-39	F56A12.1	HD	JA	sjj_F56A12.1		CisBP + wTF2.0	High
WBGene00006744	unc-4	F26C11.2	HD	JA	sjj_F26C11.2		CisBP + wTF2.0	High
WBGene00006778	unc-42	F58E6.10	HD	JA	sjj_F58E6.10		CisBP + wTF2.0	High
WBGene00006790	unc-55	F55D12.4	ZF - NHR	JA	sjj_F55D12.4		CisBP + wTF2.0	High
WBGene00006796	unc-62	T28F12.2	HD	JA	sjj_T28F12.2		CisBP + wTF2.0	High
WBGene00006818	unc-86	C30A5.7	HD	JA	sjj_C30A5.7		CisBP + wTF2.0	High
WBGene00006827	unc-98	F08C6.7	ZF - C2H2	MV	mv_F08C6.7		CisBP + wTF2.0	High
WBGene00006881	vab-15	R07B1.1	HD	MV	mv_R07B1.1		CisBP + wTF2.0	High
WBGene00006870	vab-3	F14F3.1	HD	JA	sjj_F14F3.1		CisBP + wTF2.0	High
WBGene00006873	vab-7	M142.4	HD	JA	sjj_M142.4		CisBP + wTF2.0	High
WBGene00020942	W02D7.6	W02D7.6	ZF - C2H2	JA	sjj_W02D7.6		CisBP + wTF2.0	High
WBGene00021019	W04B5.2	W04B5.2	ZF - C2H2	JA	sjj_W04B5.2		Manually curated from wTF2.0	Medium
WBGene00012243	W04D2.4	W04D2.4	ZF - C2H2	NF	pNF577		Manually curated from wTF2.0	Medium
WBGene00006943	wrm-1	B0336.1	β-catenin/armadillo	NF	pNF489		Manually curated from wTF2.0	Medium
WBGene00006959	xbp-1	R74.3	bZIP	JA	sjj_R74.3		CisBP + wTF2.0	High
WBGene00001514	xnd-1	C05D2.5	AT Hook	JA	sjj_C05D2.5		Manually curated from wTF2.0	Medium
WBGene00013734	Y111B2A.10	Y111B2A.10	ZF - C2H2	NF	pNF595		CisBP + wTF2.0	High
WBGene00012473	Y17G7B.22	Y17G7B.22	ZF - C2H2	NF	pNF583		Manually curated from wTF2.0	Medium
WBGene00021254	Y22D7AL.16	Y22D7AL.16	ZF - C2H2	JA	sjj_Y22D7AL.16		Manually curated from wTF2.0	Medium
WBGene00021374	Y37E11B.1	Y37E11B.1	ZF - C2H2	JA	sjj_Y37E11B.1		CisBP + wTF2.0	High
WBGene00021387	Y37F4.6	Y37F4.6	ZF - C2H2	NF	pNF575		Manually curated from wTF2.0	Medium
WBGene00012854	Y44A6D.3	Y44A6D.3	Brinker	NF	pNF498		New CisBP	High
WBGene00012994	Y48C3A.12	Y48C3A.12	TSC-22/DIP/BUN	MV	mv_Y48C3A.12		CisBP + wTF2.0	High
WBGene00021679	Y48G1C.6	Y48G1C.6	CENPB	MV	mv_Y48G1C.6		New CisBP	High
WBGene00021689	Y48G8AL.10	Y48G8AL.10	ZF - C2H2	NF	pNF580		CisBP + wTF2.0	High
WBGene00013055	Y50E8A.12	Y50E8A.12	ZF - THAP	MV	mv_Y50E8A.12		New CisBP	High
WBGene00013152	Y53F4B.5	Y53F4B.5	ZF - C2H2	JA	sjj_Y53F4B.5		Manually curated from wTF2.0	Medium
WBGene00013178	Y53H1A.2	Y53H1A.2	ZF - C2H2	JA	sjj_Y53H1A.2		CisBP + wTF2.0	High
WBGene00021931	Y55F3AM.14	Y55F3AM.14	ZF - C2H2	MV	mv_Y55F3AM.14		CisBP + wTF2.0	High
WBGene00013236	Y56A3A.18	Y56A3A.18	ZF - C2H2	JA	sjj_Y56A3A.18		Manually curated from wTF2.0	Medium
WBGene00013240	Y56A3A.28	Y56A3A.28	ZF - C2H2	JA	sjj_Y56A3A.28		CisBP + wTF2.0	High
WBGene00013270	Y57A10A.31	Y57A10A.31	ZF - C2H2	JA	sjj_Y57A10A.31		Manually curated from wTF2.0	Medium
WBGene00012385	Y5F2A.4	Y5F2A.4	ZF - C2H2	JA	sjj_Y5F2A.4		CisBP + wTF2.0	High
WBGene00044211	Y60A3A.25	Y60A3A.25	bZIP	NF	pNF506		New CisBP	High
WBGene00013465	Y67H2A.10	Y67H2A.10	ZF - C2H2	NF	pNF589		Manually curated from wTF2.0	Medium
WBGene00013505	Y71A12B.8	Y71A12B.8	ZF - C2H2	NF	pNF584		Manually curated from wTF2.0	Medium
WBGene00022268	Y73E7A.1	Y73E7A.1	HMG box	NF	pNF551		New CisBP	High
WBGene00013543	Y75B8A.6	Y75B8A.6	CxC	NF	pNF511		New CisBP	High
WBGene00013580	Y79H2A.3	Y79H2A.3	ZF - C2H2	JA	sjj_Y79H2A.3		Manually curated from wTF2.0	Medium
WBGene00022334	Y82E9BR.1	Y82E9BR.1	ZF - C2H2	JA	sjj_Y82E9BR.1		Manually curated from wTF2.0	Medium
WBGene00022349	Y82E9BR.17	Y82E9BR.17	ZF - C2H2	JA	sjj_Y82E9BR.17		Manually curated from wTF2.0	Medium
WBGene00006970	zag-1	F28F9.1	ZF - C2H2	JA	sjj_F28F9.1		CisBP + wTF2.0	High
WBGene00013859	ZC247.1	ZC247.1	HTH	NF	pNF536		New CisBP	High
WBGene00022518	zfh-2	ZC123.3	ZF - C2H2	JA	sjj_ZC123.3		CisBP + wTF2.0	High
WBGene00009448	zfp-2	F35H8.3	ZF - C2H2	JA	sjj_F35H8.3		CisBP + wTF2.0	High
WBGene00011597	zim-1	T07G12.6	ZF - C2H2	MV	mv_T07G12.6		CisBP + wTF2.0	High
WBGene00011600	zim-2	T07G12.10	ZF - C2H2	JA	sjj_T07G12.10		Manually curated from wTF2.0	Medium
WBGene00011601	zim-3	T07G12.11	ZF - C2H2	JA	sjj_T07G12.11		Manually curated from wTF2.0	Medium
WBGene00006986	zip-1	Y75B8A.35	bZIP	MV	mv_Y75B8A.35		Manually curated from wTF2.0	Medium
WBGene00012101	zip-10	T27F2.4	bZIP	JA	sjj_T27F2.4		CisBP + wTF2.0	High
WBGene00021082	zip-11	W08E12.1	bZIP	JA	sjj_W08E12.1		CisBP + wTF2.0	High
WBGene00019327	zip-2	K02F3.4	bZIP	JA	sjj_K02F3.4		CisBP + wTF2.0	High
WBGene00012330	zip-3	W07G1.3	bZIP	NF	pNF653		CisBP + wTF2.0	High
WBGene00021552	zip-4	Y44E3B.1	bZIP	JA	sjj_Y44E3B.1		CisBP + wTF2.0	High
WBGene00007932	zip-5	C34D1.5	bZIP	JA	sjj_C34D1.5		CisBP + wTF2.0	High
WBGene00011130	zip-6	R07H5.10	bZIP	JA	sjj_R07H5.10		CisBP + wTF2.0	High
WBGene00013100	zip-7	Y51H4A.4	bZIP	JA	sjj_Y51H4A.4		CisBP + wTF2.0	High
WBGene00017755	zip-8	F23F12.9	bZIP	JA	sjj_F23F12.9		CisBP + wTF2.0	High
WBGene00077761	zip-9	F17C11.17	bZIP	NF	pNF503		New CisBP	High
WBGene00044390	ZK177.11	ZK177.11	bHLH	NF	pNF497		New CisBP	High
WBGene00022671	ZK177.3	ZK177.3	ZF - C2H2	JA	sjj_ZK177.3		Manually curated from wTF2.0	Medium
WBGene00022681	ZK185.1	ZK185.1	ZF - C2H2	JA	sjj_ZK185.1		Manually curated from wTF2.0	Medium
WBGene00022762	ZK546.5	ZK546.5	ZF - C2H2	JA	sjj_ZK546.5		Manually curated from wTF2.0	High
WBGene00022795	ZK686.5	ZK686.5	ZF - C2H2	NF	pNF590		CisBP + wTF2.0	High
WBGene00007105	znf-207	B0035.1	ZF - C2H2	JA	sjj_B0035.1		Manually curated from wTF2.0	Medium
WBGene00018833	ztf-1	F54F2.5	ZF - C2H2	JA	sjj_F54F2.5		Manually curated from wTF2.0	Medium
WBGene00009939	ztf-11	F52F12.6	ZF - C2HC	JA	sjj_F52F12.6		CisBP + wTF2.0	High
WBGene00018704	ztf-13	F52E4.8	ZF - C2H2	JA	sjj_F52E4.8		Manually curated from wTF2.0	Medium
WBGene00011066	ztf-15	R06C7.9	ZF - C2H2	JA	sjj_R06C7.9		CisBP + wTF2.0	High
WBGene00019960	ztf-16	R08E3.4	ZF - C2H2	NF	pNF598		CisBP + wTF2.0	High
WBGene00011639	ztf-17	T09A5.12	ZF - C2H2	MV	mv_T09A5.12		Manually curated from wTF2.0	Medium
WBGene00020763	ztf-18	T24C4.7	ZF - C2H2	JA	sjj_T24C4.7		Manually curated from wTF2.0	Medium
WBGene00008762	ztf-2	F13G3.1	ZF - C2H2	JA	sjj_F13G3.1		CisBP + wTF2.0	High
WBGene00012702	ztf-20	Y39B6A.46	ZF - C2H2	NF	pNF593		CisBP + wTF2.0	High
WBGene00012988	ztf-22	Y48C3A.4	ZF - C2H2	MV	mv_Y48C3A.4		Manually curated from wTF2.0	Medium
WBGene00021846	ztf-23	Y54E10BR.8	ZF - C2H2	JA	sjj_Y54E10BR.8		CisBP + wTF2.0	High
WBGene00012405	ztf-25	Y6G8.3	ZF - C2H2	JA	sjj_Y6G8.3		CisBP + wTF2.0	High
WBGene00010137	ztf-26	F55H12.6	ZF - C2H2	NF	pNF591		CisBP + wTF2.0	High
WBGene00011661	ztf-27	T09F3.1	ZF - C2H2	JA	sjj_T09F3.1		CisBP + wTF2.0	High
WBGene00018099	ztf-28	F36F12.8	ZF - C2H2	JA	sjj_F36F12.8		CisBP + wTF2.0	High
WBGene00013438	ztf-29	Y66D12A.12	ZF - C2H2	NF	pNF585		CisBP + wTF2.0	High
WBGene00016905	ztf-3	C53D5.4	ZF - C2H2	JA	sjj_C53D5.4		CisBP + wTF2.0	High
WBGene00015523	ztf-30	C06E1.8	ZF - C2H2	JA	sjj_C06E1.8		CisBP + wTF2.0	High
WBGene00020399	ztf-4	T10B11.3	ZF - C2H2	JA	sjj_T10B11.3		Manually curated from wTF2.0	Medium
WBGene00012317	ztf-6	W06H12.1	ZF - C2H2	JA	sjj_W06H12.1		CisBP + wTF2.0	High
WBGene00009772	ztf-7	F46B6.7	ZF - C2H2	MV	mv_F46B6.7		CisBP + wTF2.0	High
WBGene00022598	ztf-8	ZC395.8	ZF - C2H2	MV	mv_ZC395.8		Manually curated from wTF2.0	Medium
WBGene00013966	ztf-9	ZK287.6	ZF - C2H2	NF	pNF510		New CisBP	High
WBGene00007063	2L52.1	2L52.1	ZF - C2H2	JA	sjj_2L52.1		Manually curated from wTF2.0	Medium

## Sheet: Generated clones
Gene name	DBD	Clone Name	Length	Forward primer	Reverse primer
C46C2.7	AP-2	pNF486	948	TTGTCTTGATGCCAGCTTTCG	TCCAATTATCTTCGGTTGACG
arid-1	ARID - RBP	pNF487	1460	ACCACTAACCTTGTCATCGTC	TGAGCAAGTCGATGAAGAAG
swsn-7	ARID - RFX	pNF500	1575	AATGGAACCGTGGAAGTGTGC	TCGACTCTTTCATCGGAGCTG
bar-1	Beta-catenin/ARmadillo	pNF501	1300	TCACCCTGAATTAGGTAACG	GTGCAACAAATATCCGACTG
hmp-2	Beta-catenin/ARmadillo	pNF502	950	TGCTGTAGATGGAGTTCCAATG	ATTGTGATTAGGGCGCATTTG
wrm-1	Beta-catenin/ARmadillo	pNF503	1051	ATTGTGACGGTAGAAGTGCTG	TGTACCCGCACAAAGATTCATTC
hlh-14	bHLH	pNF504	1000	TGCCAGAAATGAGAGAGAACG	AGTATGGAGACCCGTAAATGC
hlh-16	bHLH	pNF505	938	GATTATGTCTTCGGAATCAC	CATGTTGATGTGATGCAGTC
hlh-17	bHLH	pNF506	1200	GTACTGTAACTTTGGAGGCGGAG	AACTGGGAGACCAATATACTCAGC
hlh-4	bHLH	pNF507	953	AAATGGCAAGATGTGCTTCC	TCTGAACAGCCACTGCACAT
lin-22	bHLH	pNF508	650	TTCCGTAGGCAGGTTTGAATGAG	AAACTAGGCCGAAACCCTGC
ZK177.11	bHLH	pNF509	262	TTCTCCAGAGTGGAACGTCAG	TCAAGTATCATGTGTTCAGTCCATC
Y44A6D.3	Brinker	pNF510	1302	ATCCAGGCACTCCGTATAGTC	GGATTGTTTGATTCGGCAACG
atf-8	bZIP	pNF511	1615	AGCCTATGTGCTCATCCTTCAAC	GTTGCTGACTAGCACTGTACTCC
C32E8.1	bZIP	pNF512	400	GAAGCAAGAGGATTGCAGAAGC	GCATTCGGTGCAAATTGTGTG
cebp-2	bZIP	pNF513	416	TGCAATTTCAAGCGATGAGTGG	TTGTTATCTACACGGCGGAAGAAG
F41H10.4	bZIP	pNF514	814	ATGAAGCTGCAAAGAACCACG	TTCACGGACATCTGAATCTCG
hpo-39	bZIP	pNF515	716	AGACGGATTTCTTCGCTTTCTC	ATCGTTGGTCATATCGCGTC
maf-1	bZIP	pNF516	1039	AGAAACGTGGTGATGCAATGG	GTATTGTTGTTGGCGCAATCG
Y60A3A.25	bZIP	pNF517	892	TGGCTACTCGTGTATGTTCTCG	ACAACCGCTTGCTAAAGTACC
zip-3	bZIP	pNF518	1350	CCAGACTTCTCGTGTCCAACAAC	ACTCATCACTGTCTTCCGAGCAC
zip-9	bZIP	pNF519	785	TTGATCTTCTTCCCAAGGGTG	TAACAAGAGTTTGTCCGGGAG
bnc-1	C2H2 ZF	pNF520	854	TACATACGTGGTGTCAGGATGC	TAAGGTTAGTGACTCGGGCATG
egrh-3	C2H2 ZF	pNF521	1111	TTTCCAACGACGTTTAGCCAG	ATTTGGCTGCTGTGAGCTTC
ztf-9	C2H2 ZF	pNF522	696	AATTCGCCCTTGTCAGTCAC	GTCAATAACCATGTCGCAGTCG
drap-1	CBF	pNF523	1800	ACCACCCGTTGTTCGTTCTTTC	GAAGGTGTGGGTCGGTAATGG
Y75B8A.6	CxxC	pNF524	1068	CCTCGTAATGGAGTTTCACAGC	CTTGTCCCTTCATATCCTGTGC
ets-10	ETS	pNF525	300	TAGTTTACGCAATGCCCAGC	TGAATCCAGAGGCATGTTCA
ets-4	ETS	pNF526	1180	TTCAGCCGCCTAGAAACTGT	ACACCAAACGCTGCTTCTTT
ceh-63	HD	pNF527	1014	TAAGAACATCAAACCGCCACC	TCGTCAGACTTCTTCATCATGC
ceh-87	HD	pNF528	1023	TTCTGGAGTCTTCGCAGGTTGAG	GCGCCGGTGTTTGTTATTGC
ceh-90	HD	pNF529	1778	AAATAGCCGAGTTAGGGCTTC	TTTGCGTCCGATACTCTGATTG
ceh-92	HD	pNF530	435	AAGCAAGATAAATGGCCGCTG	AAACGAACCCGTTGAGAAACC
ceh-99	HD	pNF531	1261	TTCAGATTCGCAGATGGTTC	ACATTTCTAAAGTTCGGCTCCAG
nsy-7	HD	pNF532	1233	ACAGACGAAATCTACCGAACC	TAGTTGTGTCAAGCCGTCGTC
ceh-93	HD - 2domains	pNF533	1308	GAAGGCAACAACACTCACAAG	GGTGATGTGGGAAACTCCAAG
ceh-44	HD - CUT	pNF534	381	TCGCGTAGAAAACTGTGACG	TGTTTCTAGATCCCCGAACG
ceh-16	HD - HOX	pNF535	1159	AGAAGATATGCGCCGAGAAAGG	GCCTACCGTAACCGCCTAAC
ceh-62	HD - HOX	pNF536	1178	TAATGTCAGTAGTCGGCAGC	TTGGGTCGAATAATGGAGGAG
ceh-1	HD - NK	pNF537	786	GGCTTTCGTGTCGAAGATTTGC	GCCAAGTTTCAAGCTCATGTG
ceh-30	HD - NK	pNF538	1474	AGTTCTCTTCCGGGGTCAAT	TCATCATCCACGAACAGCAT
ceh-31	HD - NK	pNF539	960	TAGATCCATCTCCTACCTCC	CAGGAGATACTGATGGTGATTC
ceh-5	HD - NK	pNF540	662	CTTGATTCAACTATGCCTTCTGC	TGATAGAAATGCAGCGGCTGTC
ceh-75	HD - NK	pNF541	684	ATTGTGTTGACTGCCATTGGTG	TGCTGCTCATCTTCATTGAGTC
ceh-9	HD - NK	pNF542	933	CTGACTTGCTCTTCCAACTACTTCAACCC	CACAATCTGATCATCCGGTATTTCTCC
pha-2	HD - NK	pNF543	526	GCAGCGGATCACTAATCATAACG	ACCGTACTCTTATTGACCCATTCC
ceh-83	HD - POU - 2 domains	pNF544	1161	TGAGCTGAGCTATTCCTTGG	CACATTCAGCCTACTTCATC
ceh-84	HD - PRD	pNF545	1142	CTTCCAGAAGTAAAGCGCGACTC	GATTTCTTAGTCCGGGTAACGCTC
pax-2	HD - PRD	pNF546	1182	TTTGTAGCAGGGCTGTTTGG	CATTGGAGTTCTCATTGCCCAG
ttx-1	HD - PRD	pNF547	1186	AAACCTAGTCAATATGGGTGTC	AAACCGGAGAGATTTGTGTG
sem-2	HMG box	pNF548	1950	AAACCGCCCAACTTCATGCTG	CTACATCCTACCGTACTCCCAAAC
ZC247.1	HTH-Pipsqueak	pNF549	1124	TGTTTCAATCAGCGCGAGAAG	TTGTCTTGCTCGGCGAATTG
madf-11	MADF	pNF550	1310	TTGGACGACAAGGTGTATTGGTGG	ACGTGTGACTCTACCTCCAGCATC
madf-5	MADF	pNF551	1130	AGACCGACTACTTGCACAAAC	TTGAGCCATTCAAGAGCAACC
madf-3	MADF - 2 domains	pNF552	695	TCTCGATGTGCTCGAAGTCTG	AATTAGGAGCAGGTGTAGACGGAG
flt-1/baz-2	MBD	pNF553	943	TCTGGAAGACCAATGTGCATG	AAACTGATTCCAGCACGTCC
sma-4	MH1/SMAD	pNF554	952	GAAGGAAGGTTATGTCTTGGAGC	CCAGTATTTGTAGAGGACGGTG
K11D2.5	mTERF	pNF555	966	TCGTTGATCGCCACAAATTCC	AACCGGGTGCTAATTTCCATG
chd-7	MYB	pNF556	2000	CACTATGCTCATTGCCGGTGC	TGACGGCTGCTGTTGTTGTTG
R151.8	MYB	pNF557	1224	AAAGAGACAAACCAACGGCAG	TTTCTTCTTGGGCGTGGTCTTC
myrf-1	p53	pNF558	922	TTACAGGGCCTCGACAATGG	TGTTGGTTGGACACAAGTGG
F19F10.9	SART-1	pNF559	1034	AGAGATCAAGGAGGATGGTTGG	ATCAAGAGTTCCCAGTGGAGTG
Y73E7A.1	Sox	pNF560	709	GTGCCTCATTTCGGCTTGATC	TGACGAGAAACCGAAACCGAG
chpf-2	STAT	pNF561	697	TCTTTAACGGCGCACACATG	TCCTCGCGTGTGATGTAGTTG
tbx-2	T-box	pNF562	954	TCATCGCTGTTACGGCTTATC	ATCGTAACGGATGATGAGCTG
tbx-37	T-box	pNF563	2160	TGCACCTCTCCTTCTGGAATTG	CTGCTGCCAGTACCATTGTCTC
tbx-43	T-box	pNF564	800	AACTTAGGCCACCATTCTTGTC	AGTCTGGTGATGAATTGGACG
tbx-7	T-box	pNF565	899	TCTTTTCTTTTCCAGCGTCC	GAACTATGTGAAACCGGGGA
tlf-1	TBP	pNF566	742	AGTGAGGCGGATTGTAAACGAG	TTCTTCAGATGGGTCTCGACG
egl-44	TEA/ATTS	pNF567	1057	ACTCGTTCTACTCAAGTCGTG	CTGGTTGCACATGATGAGAC
C30G4.4	TSC-22/dip/bun	pNF568	1500	CCCTCCTATATCGTGTGTCTGTTTG	AATCAGGAATCAATCGAGGGACG
dpy-27	Unknown	pNF569	1157	GGTGTTCGGGATTATGCGATG	ATTGGTGGTGGAGATGGAGTTG
nhr-273	UNKNOWN	pNF570	746	AGATATTCGATGTATGTGCCGTGC	TCATAGGATGGCTTGAAGAGTC
ets-4	WH - ETS	pNF571	1180	TTCAGCCGCCTAGAAACTGT	ACACCAAACGCTGCTTCTTT
ets-8	WH - ETS	pNF572	1993	TCTCACCTATCTTATCCGTCCAGC	AAATTGGAGCAAAGTAGGTCGTGG
fkh-9	WH - Fork Head	pNF573	1935	AGTTCAGAGTTCAGCAACCTCC	GTGCAAACTAGGAGCACAACC
efl-1	WH-TDP	pNF574	1500	TCGTTTCCAACCATGAGCTAC	TATGAATTGTGTGGGCACTGTGG
grl-25	WT1 - 2 domains	pNF575	1400	GCGCCCATTTCACAACACTATAAC	ACAGTGCTCACGATTCTCTCC
bed-1	ZF - BED	pNF576	1380	CACCTCTTCCATCGAGCACTG	TTGGTTATTCTTCGTGCTCTTGG
C27A2.7	ZF - C2H2	pNF577	836	TTCCTGAACACCATCAGTTCC	AATGACTGGAGTAGCTTGATGAG
D2092.10	ZF - C2H2	pNF578	754	GAATGTTCATGGTGAGTCAGG	GCATTAGCTTTCACCAACTCAG
egrh-2	ZF - C2H2	pNF579	1071	ATTTGCGCGATGTGATGAACG	TGTCTATCGGTTCGCAAATGTC
C02F5.12	ZF - C2H2 - 1 finger	pNF580	1692	AGAAAACGATTGGTTGTCCG	TGGAGAACCACACATTCCAA
C52E12.1	ZF - C2H2 - 1 finger	pNF581	614	CAGTAACAAAATCGCTGGCA	CGTGCTCATTTGCTCTGTGT
F52B5.7	ZF - C2H2 - 1 finger	pNF582	1866	CCTATCACCGCTTCTTCGCAC	TCATCACTTTCAACACCGGCATC
K11D12.12	ZF - C2H2 - 1 finger	pNF583	1200	CGTAACAACGAAGCATCTGGAAC	ATCCGCTGGTTTCTAAGCGAC
T06G6.5	ZF - C2H2 - 1 finger	pNF584	780	AAATCTCTCGATATGCCAGCAG	GTGTTTACATGGTAAGTGGCGAG
W04D2.4	ZF - C2H2 - 1 finger	pNF585	1240	AAGTTGTCGAAACGCAGACG	CGCTAAGTTCGTCTTCGATTGG
Y37F4.6	ZF - C2H2 - 1 finger	pNF586	1400	TTTCCAGACTCACAGAGGTCTTC	CTGACACAGATTGAGCGGGAC
saeg-1	ZF - C2H2 - 1 finger, MYB	pNF587	2078	ACGTGGGACACCACTCAATATC	TTGTTGTTGTGGAGTGAGTGGAG
K04C1.3	ZF - C2H2 - 1 finger, WH - Fork Head	pNF588	947	ACGGATTCGATGTGCTAGTG	GAGATGACGAAAGTATGGCAG
Y48G8AL.10	ZF - C2H2 - 12 fingers	pNF589	1400	AATGATATGCGCCTCAACCTG	GTTGGGCATTCCGAGATTAC
lin-13	ZF - C2H2 - 15 fingers	pNF590	1730	ATCGTGTAAGACTTGCCACTGC	TTTCTGGTTCTCCAATGGCTGC
R144.3	ZF - C2H2 - 2 fingers	pNF591	950	GGCCATCCTCGTCTTCTTATAG	CCATCATATTTAGGGTCACCAG
scrt-1	ZF - C2H2 - 2 fingers	pNF592	1850	GTTCCCTGTGCTATCAACACC	AATCCATTCGCGGAAGACAC
Y17G7B.22	ZF - C2H2 - 2 fingers	pNF593	2150	CCCGGTGCAAGAAACACTTAAC	AGCCAAATGCTGCTCCAACAC
Y71A12B.8	ZF - C2H2 - 2 fingers	pNF594	721	ACATTGCCGAGCACATCTTCC	ACAAGATGTTGGAGTTTGGCTGG
ztf-17	ZF - C2H2 - 2 fingers	pNF595	963	AGGTGTGCGCCTTTAAGATG	ATATGACAAAGTGCAGAGAGGTG
ztf-29	ZF - C2H2 - 2 fingers	pNF596	1300	AATGCCTTACCGTCCAGAAGC	AAGCCGACGACGAGAAATTGG
F47E1.3	ZF - C2H2 - 3 fingers	pNF597	1012	ACAGTGTGGCGTCATTAACAG	TCGTGGACGTGAAGAATGTG
slr-2	ZF - C2H2 - 3 fingers	pNF598	417	TCCAGTGTCAATTCCTCCACAAC	ACCTCATCTTCACTCCATTGCTC
Y67H2A.10	ZF - C2H2 - 3 fingers	pNF599	1600	GCAGTTTCCGATGTTCAAGACG	GGAGGTGGCATTTGTTGCATTG
ZK686.5	ZF - C2H2 - 3 fingers	pNF600	770	TGAGCCATGAATCTGTAGGATGC	TGGGTTCTCAACGATTGCTTGTC
ztf-20	ZF - C2H2 - 3 fingers	pNF601	720	CACCTAGAGCAACTCAAACACG	CCGAACATTCCGCACAAATC
ztf-26	ZF - C2H2 - 3 fingers	pNF602	940	AACTGCAAATGCGAACACATCC	CCAGTAGATGTTCCCGCATGAG
lst-5	ZF - C2H2 - 4 fingers	pNF603	947	TCAGGTTTGATCCGAGTAGG	TCTGCCTTGGTTAATCGTTTCG
snai-1	ZF - C2H2 - 4 fingers	pNF604	2053	CGGCACCCTCATCATCTTCTTC	TTTCAGCCTCACCACCACTTC
M03D4.4	ZF - C2H2 - 6 fingers	pNF605	1066	TTGATGATTCATTCCGGTGGAC	ACGTTGAAGATTCCGAAGCAG
Y111B2A.10	ZF - C2H2 - 6 fingers	pNF606	1155	AACTCACGAATGGTACTGCAAG	TGTGCTTCCTCAATTCTGATGG
sma-9	ZF - C2H2 - 7 fingers	pNF607	1270	TCGATACCACGGATTGTGAGAAG	GGTCGCTTGTTGTGTAGACG
ztf-16	ZF - C2H2 - 8 fingers	pNF608	870	ACTGTTCACTCGGACTTGGAGC	CAGCACAATGCACTCCGAGC
mex-6	ZF - CCCH - 2 domains	pNF609	1289	TCAACAAGCTGCTCCAATGTAC	ACGAGTGAGCAATCTGGAGTG
dmd-7	ZF - DM	pNF610	1529	TTTCTGCCGCAAATGCGAAG	TGTGTGAGTGCTTGTGTGTAGAC
mab-23	ZF - DM	pNF611	1700	TCCAGTCCTATTTGAGCCTCTTC	TCAATGACGTGGCAGATTCTCC
dmd-8	ZF - DM - 2 domains	pNF612	1700	GCATCCCTTATCTTGTAGCCCTC	AATCAATCGGTTTCAGCGCAGC
flh-2	ZF - FLYWCH	pNF613	1145	CTCAATCAATGCAGCAGCAAC	AAATGTAGCGTGCAGCGAAAC
elt-4	ZF - GATA	pNF614	214	ACAGTTTCGAAATGCCAGGA	TCCAATTGCAATGGTACGAA
nhr-101	ZF - NHR	pNF615	1400	GGTCTTGTGCTTTCAAACTCTGC	GCCAACTTTGCTTGGAGAGAAAC
nhr-107	ZF - NHR	pNF616	2200	TTCCTCTGTCTCTACCTCTCACAC	TTTGGGCTAACTTCTGCGACG
nhr-109	ZF - NHR	pNF617	938	ATACGCTGATGCCTGAATGG	AGTCATCTCCATGTCATCCTG
nhr-112	ZF - NHR	pNF618	1002	GAGGACAGGGATAGAGTAGGTTTG	ATGATTCATCTCGCACACCAAC
nhr-114	ZF - NHR	pNF619	902	AATTACAGCCTCCACCAATCTCG	CAACCTTTCGATTGCCGTGTC
nhr-118	ZF - NHR	pNF620	1335	TTTCCAGCCGTTGCGACATTG	GACTCCACTCACATCAAGTTCC
nhr-122	ZF - NHR	pNF621	778	ATTGGACTTGCCGAAGTTGC	TCAACGCTGATAGTGCCAAG
nhr-129	ZF - NHR	pNF622	1372	AGTTGCTTTCCAGATCATTCCAC	TTTGCATTCTTTGCTGTCGTTCC
nhr-131	ZF - NHR	pNF623	744	TTCGGTCAGTTTGCCACCATAG	AACGCAACTCACTATCTCAACTG
nhr-136	ZF - NHR	pNF624	873	ACTTGTCTAGGCGCATGTGTC	CGATTAAGTTCATGTCGGAGCAC
nhr-138	ZF - NHR	pNF625	1505	AATTGGCAAACGCTATACACG	AGGGAGATAGTTACAGAGGTAGG
nhr-145	ZF - NHR	pNF626	1484	GCGAGTTATCCGGCTCCTTG	ACGATTTCTTCGGTTGTCAGGTC
nhr-146	ZF - NHR	pNF627	873	GAAGCTGTGACGTAAGCAGTG	TTGAAATCAAGTTGCCCAGTCG
nhr-156	ZF - NHR	pNF628	739	TCTCGTTCTGCAAAGTTTGTG	CCAACCTGTAATTCGTGTGAC
nhr-161	ZF - NHR	pNF629	1439	ATGCTGTGCAAGATTTGTGACG	TGTGGACCTCCTCTTGAAACC
nhr-167	ZF - NHR	pNF630	1130	AGCCCTGGACAGACTTACAAC	TATGCTGCTTCAATGCCATCC
nhr-171	ZF - NHR	pNF631	1288	ATTCAGGCAGTCTCCTGTGAAG	AGGTAGGAGAGCTTGAGTCATG
nhr-177	ZF - NHR	pNF632	985	AATGAGCAACTTGGAGCAACTG	GGGTTTGAAATTCGTGGGTTG
nhr-189	ZF - NHR	pNF633	1753	AAGAGACCGAGGAAGTCAAAGC	ACTGTTAGCGTCTTCCGATGTC
nhr-201	ZF - NHR	pNF634	1023	AGAGGGACCCGTATAAGCAG	TTCCACATTGTGCTTCGGAC
nhr-202	ZF - NHR	pNF635	438	CCAATTTCACTCTACAACTCACC	TGGTCTTGGTAGATGAATTGCTGG
nhr-203	ZF - NHR	pNF636	1585	TTCCATTTGTAAGTTGGCCGTC	GATCTTCCGCACTTCCATTGAC
nhr-209	ZF - NHR	pNF637	1119	AGTCAACGACTGTGCAAAGG	CGGATGTGAGCATTCTCGTTG
nhr-210	ZF - NHR	pNF638	1074	TTCATTGATGTCAGCTACCTGC	CCAACTCAATTCGTGGTCTCTG
nhr-238	ZF - NHR	pNF639	1179	TTTGTGGTGTTTGTGAGCATTCC	GTATTAGAATAAGGTCTCCGGTCC
nhr-239	ZF - NHR	pNF640	1288	TTGAGACTCTTCGCACCAAC	AATAAGACTGCTCATGGAGCTTC
nhr-241	ZF - NHR	pNF641	1500	GATCTTCCCTCCACATCATCC	GTGCCTGGCAACATGACTTTATTC
nhr-242	ZF - NHR	pNF642	1002	TTGCCGAGATGGTCGAGTAG	GAGTTTAGTTGCACTTCGCCAG
nhr-245	ZF - NHR	pNF643	1023	AGTAGACGGGTTCAGCAAGATC	GATGATACATCCGAGCCATGTC
nhr-248	ZF - NHR	pNF644	956	GACGATTTGGAGCACTTGCATG	TTCACCGAATCTTTCCACTCCAC
nhr-252	ZF - NHR	pNF645	1117	AGGATTACTGTGTGCCGAGTC	TCGATTCCGTCCTTGACCAG
nhr-255	ZF - NHR	pNF646	874	GCCAAGGTGAGCAAGACAGAAATC	TGATAGCAAATCACCAAAGCGAC
nhr-261	ZF - NHR	pNF647	522	ATCACACCGGCTCAGCAATG	CGATTTCCATGTCGCTCAGTTTC
nhr-264	ZF - NHR	pNF648	1023	TGCCGAGCCTGTAGGTATAAC	AATTTCTGAGTGCAGCGGTAAC
nhr-274	ZF - NHR	pNF649	576	CAGGACCTCCCAAACACAAAC	TCGGTAATTGTTGGGCTTGTTGG
nhr-275	ZF - NHR	pNF650	1000	GATTTCCAATACAACCGTGACC	TTTCAGCTTCTCCCTCCGTTC
nhr-283	ZF - NHR	pNF651	1242	AACTTTCAGGTGTTGTGTTGC	GGCCCACGGATTGAGTTAAGAATG
nhr-285	ZF - NHR	pNF652	1350	GCTCCAACGTGCTCTATTTGC	GCTTCTTCTTCGTAACCGCAAATC
nhr-286	ZF - NHR	pNF653	1032	GTGAACGTGAAGTAAGGCAGTG	GTTCACGGAAGAGTTCTTGTCG
nhr-31	ZF - NHR	pNF654	1107	GCCGATTTGGAAACTTGTTGC	GTCATTCTGGAAGGCACTGTC
nhr-32	ZF - NHR	pNF655	997	GGAATCCTGGAAACGTACAGC	CAGACTCCGCTGAGAACATCG
nhr-36	ZF - NHR	pNF656	887	TCAGGTTAGCCGTCAGTTTCAAG	CGACCAGAAATCTAGGACACCAG
nhr-41	ZF - NHR	pNF657	1020	GTAGCGTGAATCAAATGGCGTC	AGCGAAGATGTTGAGAGAGTATCC
nhr-42	ZF - NHR	pNF658	535	ACACACGTCTCCCAATGTTGC	TGGGTCTTGAGCGTTTGCTTG
nhr-48	ZF - NHR	pNF659	760	TGCGAATGTTTAGGAGCCAC	GCGCTACTCCACCTTTAAGTTC
nhr-5	ZF - NHR	pNF660	1389	AATTTCAGTCACCTCGGCAACG	AGCTCACCCTCAAATCATCCAAC
nhr-52	ZF - NHR	pNF661	1100	AACGAAATCTCACGAGTGGAC	TGCACAAAGCAGTAATCTTCCAC
nhr-61	ZF - NHR	pNF662	1194	TGCAAAGCCAACCGACGAACG	ATCGGTGATCCCGAAGCTCTTG
nhr-78	ZF - NHR	pNF663	1343	CATTCGACTTCCGCTCGTAC	AAGTTCCATTACTTCGGCCTG
nhr-86	ZF - NHR	pNF664	1340	AGCACAGTCCTGCTATTTACCAAC	CCTGAAGCGCAGGTAACAATG
srt-58	ZF - NHR	pNF665	688	ATCAGCTACCTGTGCAAACG	TGATTGTGTTGGGAGTTGTGG
ZK1037.13	ZF - NHR	pNF666	1112	GGTTGAGGAAACGTAAGGGAAG	TCGGCTATGTTCGGCATTTG
nhr-135	ZF - NHR	pNF667	1747	CGCATAGTTTGTAGTTGATCGGTG	TTATGAGACACGCTTCTGGGTCC
