# Supplementary material for: Joint actions of diverse transcription factor families establish neuron-type identities and promote enhancer selectivity
Source: HighWire-hosted journal article supplement (doi:10.1101/gr.275623.121), 2022-01-24
Supplement: Supplemental_Table_S2.xlsx [file Supplemental_Table_S2.xlsx]

## Sheet: MA screen results
n.e: not expressed
+: phenotype present
-: phenotype absent
TF RNAi screen results
Gene.name	DBD	Clone.name	Neuron.affected	Phenotype	Replica 1: % missing reporter			Replica 2: % missing reporter			Replica 3: % missing reporter			Mean values per reporter
					cat-1 ::gfp	dat-1:: mCherry	tph-1 ::dsred	cat-1 ::gfp	dat-1:: mCherry	tph-1 ::dsred	cat-1 ::gfp	dat-1:: mCherry	tph-1 ::dsred	cat-1	tph-1 or dat-1	All
lin-32	bHLH	sjj_T14F9.5	PDE	Missing fluorescence	91,67	91,67	n.e.	88,33	88,33	n.e.				90	90	90
lag-1	CSL	mv_K08B4.1	ADF	Missing fluorescence	91,67	n.e.	88,33	80	n.e.	86,67				85.83	87.5	86.67
unc-4	HD	sjj_F26C11.2	VCs	Missing fluorescence	91,67	n.e.	n.e.	11,67	n.e.	n.e.	75	n.e.	n.e.	83.33	n.e.	n.e.
lin-28	CSD	mv_F02E9.2	PDE	Missing fluorescence	83,33	83,33	n.e.	80	80	n.e.				81.67	81.67	81.67
lin-39	HD	sjj_C07H6.7	VCs	Missing fluorescence	80	n.e.	n.e.	76	n.e.	n.e.				78	n.e.	n.e.
lin-40	ZF - GATA	sjj_T27C4.4	VCs	Missing fluorescence	76,67	n.e.	n.e.	70	n.e.	n.e.				73.33	n.e.	n.e.
tra-1	ZF - C2H2	sjj_Y47D3A.6	VCs	Missing fluorescence	66,67	n.e.	n.e.	66,67	n.e.	n.e.				66.67	n.e.	n.e.
ceh-20	HD	sjj_F31E3.1	VCs	Missing fluorescence	73,33	n.e.	n.e.	6,67	n.e.	n.e.	56,67	n.e.	n.e.	65	n.e.	n.e.
sem-2	HMG box	pNF535	HSN	Missing fluorescence	56,67	n.e.	63,33	73,33	n.e.	73,33				65	68.33	66.67
hlh-14	bHLH	pNF495	ADF	Missing fluorescence	70	n.e.	78,33	58,33	n.e.	65				64.17	71.67	67.92
unc-86	HD	sjj_C30A5.7	HSN	Missing fluorescence	70	n.e.	80	58,33	63,33	n.e.				64.17	71.67	67.92
hbl-1	ZF - C2H2	sjj_F13D11.2	PDE	Missing fluorescence	61,67	61,67	n.e.	63,33	65	n.e.				62.5	63.33	62.92
ham-1	WH	mv_F53B2.6	CEPV	Missing fluorescence	61,67	60	n.e.	46,67	46,67	n.e.				54.17	53.33	53.75
ham-1	WH	mv_F53B2.6	CEPD	Missing fluorescence	58,33	58,33	n.e.	43,33	43,33	n.e.				50.83	50.83	50.83
nob-1	HD	sjj_Y75B8A.2	HSN	Missing fluorescence	60	n.e.	60	8,33	n.e.	8,33	41,67	n.e.	41.67	50.83	36.67	43.75
pax-3	HD	sjj_F27E5.2	VCs	Missing fluorescence	75	n.e.	n.e.	25	n.e.	n.e.				50	n.e.	n.e.
egl-5	HD	sjj_C08C3.1	HSN	Missing fluorescence	46,67	n.e.	46,67	50	n.e.	50				48.33	48.33	48.33
sex-1	ZF - NHR	sjj_F44A6.2	HSN	Missing fluorescence	40	n.e.	33,33	45	n.e.	45				42.5	39.17	40.83
hbl-1	ZF - C2H2	sjj_F13D11.2	HSN	Missing fluorescence	41,67	n.e.	41,67	40	n.e.	36,67				40.83	39.17	40
ceh-43	HD	sjj_C28A5.4	CEPV	Missing fluorescence	41,67	41,67	n.e.	38,33	25	n.e.				40	33.33	36.67
ceh-43	HD	sjj_C28A5.4	CEPD	Missing fluorescence	41,67	41,67	n.e.	38,33	21,67	n.e.				40	31.67	35.83
vab-15	HD	mv_R07B1.1	PDE	Missing fluorescence	46,67	46,67	n.e.	33,33	36,67	n.e.				40	41.67	40.83
unc-62	HD	sjj_T28F12.2	ADE	Missing fluorescence	36,67	36,67	n.e.	41,67	41,67	n.e.				39.17	39.17	39.17
unc-62	HD	sjj_T28F12.2	PDE	Missing fluorescence	33,33	33,33	n.e.	45	38,33	n.e.				39.17	35.83	37.5
ast-1	WH - ETS	mv_T08H4.3	PDE	Missing fluorescence	33,33	43,33	n.e.	41,67	43,33	n.e.				37.5	43.33	40.42
ast-1	WH - ETS	mv_T08H4.3	HSN	Missing fluorescence	46,67	n.e.	51,67	28,33	n.e.	38,33				37.5	45	41.25
vab-3	HD	sjj_F14F3.1	CEPV	Missing fluorescence	36,67	36,67	n.e.	38,33	38,33	n.e.				37.5	37.5	37.5
ceh-20	HD	sjj_F31E3.1	ADE	Missing fluorescence	33,33	36,67	n.e.	38,33	38,33	n.e.				35.83	37.5	36.67
ast-1	WH - ETS	mv_T08H4.3	ADE	Missing fluorescence	38,33	36,67	n.e.	31,67	43,33	n.e.				35	40	37.5
ceh-20	HD	sjj_F31E3.1	PDE	Missing fluorescence	28,33	26,67	n.e.	41,67	33,33	n.e.				35	30	32.5
bed-3	ZF - BED	mv_F25H8.6	PDE	Missing fluorescence	33,33	33,33	n.e.	33,33	33,33	n.e.				33.33	33.33	33.33
lin-14	Unknown	mv_T25C12.1	VCs	Missing fluorescence	33,33	n.e.	n.e.	33,33	n.e.	n.e.				33.33	n.e.	n.e.
zip-5	bZIP	sjj_C34D1.5	RIC/RIM	Missing fluorescence	31,67	n.e.	n.e.	35	n.e.	n.e.				33.33	n.e.	n.e.
vab-3	HD	sjj_F14F3.1	ADE	Missing fluorescence	31,67	25	n.e.	33,33	33,33	n.e.				32.5	29.17	30.83
lin-14	Unknown	mv_T25C12.1	HSN	Missing fluorescence	25	n.e.	25	38,33	n.e.	48,33				31.67	36.67	34.17
sex-1	ZF - NHR	sjj_F44A6.2	ADF	Missing fluorescence	26,67	n.e.	26,67	35	n.e.	40				30.83	33.33	32.08
ceh-43	HD	sjj_C28A5.4	ADE	Missing fluorescence	30	33,33	n.e.	28,33	20	n.e.				29.17	26.67	27.92
ceh-43	HD	sjj_C28A5.4	PDE	Missing fluorescence	25	35	n.e.	33,33	15	n.e.				29.17	25	27.08
lin-28	CSD	mv_F02E9.2	HSN	Missing fluorescence	30	n.e.	30	28,33	n.e.	28,33				29.17	29.17	29.17
ref-2	ZF - C2H2	mv_C47C12.3	VCs	Missing fluorescence	33,33	n.e.	n.e.	25	n.e.	n.e.				29.17	n.e.	n.e.
unc-86	HD	sjj_C30A5.7	NSM	Missing fluorescence	33,33	n.e.	33,33	25	n.e.	33,33				29.17	33.33	31.25
lin-14	Unknown	mv_T25C12.1	NSM	Missing fluorescence	20	n.e.	20	36,67	n.e.	30				28.33	25	26.67
sem-4	ZF - C2H2	sjj_F15C11.1	HSN	Missing fluorescence	35	n.e.	38,33	20	n.e.	31,67				27.5	35	31.25
zip-10	bZIP	sjj_T27F2.4	ADF	Missing fluorescence	30	n.e.	30	3,33	n.e.	5	25	n.e.	20	27.5	18.33	22.92
ceh-44	HD	pNF521	PDE	Missing fluorescence	33,33	33,33	n.e.	20	20	n.e.				26.67	26.67	26.67
egl-18	ZF - GATA	sjj_F55A8.1	HSN	Missing fluorescence	20	n.e.	16,67	31,67	n.e.	15				25.83	15.83	20.83
C32E8.1	bZIP	pNF501	CEPD	Missing fluorescence	21,67	30	n.e.	28,33	20	n.e.				25	25	25
nhr-61	ZF - NHR	pNF545	VCs	Missing fluorescence	23,33	n.e.	n.e.	8,33	n.e.	n.e.	26,67	n.e.	n.e.	25	n.e.	n.e.
C32E8.1	bZIP	pNF501	CEPV	Missing fluorescence	21,67	30	n.e.	26,67	20	n.e.				24.17	25	24.58
lin-26	ZF - C2H2	sjj_F18A1.2	PDE	Missing fluorescence	21,67	21,67	n.e.	25	21,67	n.e.				23.33	21.67	22.5
vab-3	HD	sjj_F14F3.1	PDE	Missing fluorescence	21,67	18,33	n.e.	25	20	n.e.				23.33	19.17	21.25
hlh-3	bHLH	sjj_T24B8.6	HSN	Missing fluorescence	25	n.e.	33,33	20	n.e.	30				22.5	31.67	27.08
lim-4	HD	sjj_ZC64.4	ADF	Missing fluorescence	25	n.e.	33,33	20	n.e.	33,33				22.5	33.33	27.92
nhr-2	ZF - NHR	sjj_C32F10.6	RIC/RIM	Missing fluorescence	18,33	n.e.	n.e.	25,83	n.e.	n.e.				22.08	n.e.	n.e.
C32E8.1	bZIP	pNF501	PDE	Missing fluorescence	18,33	31,67	n.e.	25	25	n.e.				21.67	28.33	25
dro-1	CBF	sjj_F53A2.5	CEPD	Missing fluorescence	21,67	20	n.e.	11,67	8,33	n.e.	21,67	21,67	n.e.	21.67	16.67	19.17
C32E8.1	bZIP	pNF501	ADE	Missing fluorescence	20	21,67	n.e.	21,67	28,33	n.e.				20.83	25	22.92
ceh-12	HD	mv_F33D11.4	RIC/RIM	Missing fluorescence	20	n.e.	n.e.	21,67	n.e.	n.e.				20.83	n.e.	n.e.
pqn-21	ZF - C2H2	mv_C37A2.5	ADF	Missing fluorescence	18,33	n.e.	18,33	6,67	n.e.	11,67	23,33	n.e.	16.67	20.83	15.56	18.19
ceh-16	HD	pNF522	PDE	Missing fluorescence	21,67	21,67	n.e.	18,33	21,67	n.e.				20	21.67	20.83
cep-1	p53	sjj_F52B5.5	CEPV	Missing fluorescence	18,33	20	n.e.	8,33	8,33	n.e.	21,67	23,33	n.e.	20	17.22	18.61
cep-1	p53	sjj_F52B5.5	CEPD	Missing fluorescence	20	20	n.e.	8,33	11,67	n.e.	20	18,33	n.e.	20	16.67	18.33
dnj-17	ZF - C2H2	sjj_T03F6.2	CEPV	Missing fluorescence	20	16,67	n.e.	20	18,33	n.e.				20	17.5	18.75
unc-62	HD	sjj_T28F12.2	CEPV	Missing fluorescence	18,33	20	n.e.	21,67	18,33	n.e.				20	19.17	19.58
wrm-1	Î²-catenin/armadillo	pNF489	VCs	Missing fluorescence	20	n.e.	n.e.							20	n.e.	n.e.
ceh-27	HD	mv_F46F3.1	RIC/RIM	Missing fluorescence	20	n.e.	n.e.	18,33	n.e.	n.e.				19.17	n.e.	n.e.
egl-43	ZF - C2H2	sjj_R53.3	RIC/RIM	Missing fluorescence	16,67	n.e.	n.e.	21,67	n.e.	n.e.				19.17	n.e.	n.e.
unc-62	HD	sjj_T28F12.2	CEPD	Missing fluorescence	16,67	15	n.e.	21,67	28,33	n.e.				19.17	21.67	20.42
ceh-37	HD	sjj_C37E2.5	ADF	Missing fluorescence	16,67	n.e.	16,67	15	n.e.	8,33	20	n.e.	16.67	18.33	13.89	16.11
dnj-17	ZF - C2H2	sjj_T03F6.2	CEPD	Missing fluorescence	16,67	16,67	n.e.	20	16,67	n.e.				18.33	16.67	17.5
dro-1	CBF	sjj_F53A2.5	CEPV	Missing fluorescence	16,67	16,67	n.e.	11,67	8,33	n.e.	20	21,67	n.e.	18.33	15.56	16.94
egl-46	ZF - C2H2	sjj_K11G9.4	HSN	Missing fluorescence	16,67	n.e.	16,67	20	n.e.	25				18.33	20.83	19.58
flh-1	ZF - FLYWCH	sjj_Y11D7A.12	ADF	Missing fluorescence	20	n.e.	20	16,67	n.e.	20				18.33	20	19.17
nhr-223	ZF - NHR	sjj_T26E4.8	CEPD	Missing fluorescence	16,67	16,67	n.e.	20	20	n.e.				18.33	18.33	18.33
nhr-223	ZF - NHR	sjj_T26E4.8	CEPV	Missing fluorescence	16,67	16,67	n.e.	20	21,67	n.e.				18.33	19.17	18.75
pax-3	HD	sjj_F27E5.2	ADF	Missing fluorescence	16,67	n.e.	16,67	3,33	n.e.	8,33	20	n.e.	25	18.33	16.67	17.5
row-1	ZF - C2H2	mv_F37D6.2	CEPV	Missing fluorescence	18,33	18,33	n.e.	18,33	18,33	n.e.				18.33	18.33	18.33
tbx-30	T-box	sjj_Y59E9AR.3	RIC/RIM	Missing fluorescence	18,33	n.e.	n.e.	18,33	n.e.	n.e.				18.33	n.e.	n.e.
ztf-8	ZF - C2H2	mv_ZC395.8	CEPV	Missing fluorescence	16,67	16,67	n.e.	20	18,33	n.e.				18.33	17.5	17.92
ceh-13	HD	sjj_R13A5.5	RIC/RIM	Missing fluorescence	23,33	n.e.	n.e.	4,17	n.e.	n.e.	11,67	n.e.	n.e.	17.5	n.e.	n.e.
ceh-36	HD	sjj_C37E2.4	RIC/RIM	Missing fluorescence	20	n.e.	n.e.	4,17	n.e.	n.e.	15	n.e.	n.e.	17.5	n.e.	n.e.
dro-1	CBF	sjj_F53A2.5	ADE	Missing fluorescence	18,33	18,33	n.e.	6,67	3,33	n.e.	16,67	20	n.e.	17.5	13.89	15.69
mls-2	HD	sjj_C39E6.4	PDE	Missing fluorescence	16,67	16,67	n.e.	6,67	10	n.e.	18,33	15	n.e.	17.5	13.89	15.69
unc-55	ZF - NHR	sjj_F55D12.4	CEPV	Missing fluorescence	16,67	16,67	n.e.	18,33	20	n.e.				17.5	18.33	17.92
C27A12.2	ZF - C2H2	sjj_C27A12.2	RIC/RIM	Missing fluorescence	15	n.e.	n.e.	3,33	n.e.	n.e.	19,17	n.e.	n.e.	17.08	n.e.	n.e.
dxbp-1	ZF - C2H2	sjj_Y52B11A.9	CEPV	Missing fluorescence	16,67	16,67	n.e.	16,67	16,67	n.e.				16.67	16.67	16.67
lin-28	CSD	mv_F02E9.2	VCs	Missing fluorescence	16,67	n.e.	n.e.	16,67	n.e.	n.e.				16.67	n.e.	n.e.
mef-2	MADS box	sjj_W10D5.1	ADE	Missing fluorescence	18,33	16,67	n.e.	15	20	n.e.				16.67	18.33	17.5
nhr-148	ZF - NHR	sjj_C03G6.10	RIC/RIM	Missing fluorescence	15	n.e.	n.e.	18,33	n.e.	n.e.				16.67	n.e.	n.e.
pqm-1	ZF - C2H2	sjj_F40F8.7	RIC/RIM	Missing fluorescence	23,33	n.e.	n.e.	10	n.e.	n.e.				16.67	n.e.	n.e.
R05D3.3	ZF - C2H2	mv_R05D3.3	ADF	Missing fluorescence	13,33	n.e.	13,33	20	n.e.	21,67				16.67	17.5	17.08
sdc-1	ZF - C2H2	sjj_F52E10.1	RIC/RIM	Missing fluorescence	15	n.e.	n.e.	18,33	n.e.	n.e.				16.67	n.e.	n.e.
sma-3	MH1	mv_R13F6.9	RIC/RIM	Missing fluorescence	18,33	n.e.	n.e.	15	n.e.	n.e.				16.67	n.e.	n.e.
unc-130	WH - FH	sjj_C47G2.2	ADF	Missing fluorescence	18,33	n.e.	23,33	10	n.e.	20	15	n.e.	18.33	16.67	20.56	18.61
ceh-27	HD	mv_F46F3.1	ADF	Missing fluorescence	13,33	n.e.	15	11,67	n.e.	11,67	18,33	n.e.	20	15.83	15.56	15.69
cep-1	p53	sjj_F52B5.5	ADE	Missing fluorescence	13,33	13,33	n.e.	10	13,33	n.e.	18,33	16,67	n.e.	15.83	14.44	15.14
scrt-1	ZF - C2H2	pNF567	RIC/RIM	Missing fluorescence	16,67	n.e.	n.e.	15	n.e.	n.e.				15.83	n.e.	n.e.
flh-2	ZF - FLYWCH	pNF603	ADF	Missing fluorescence	11,67	n.e.	16,67	8,33	n.e.	8,33	18,33	n.e.	20	15	15	15
mef-2	MADS box	sjj_W10D5.1	CEPV	Missing fluorescence	13,33	13,33	n.e.	16,67	15	n.e.				15	14.17	14.58
mef-2	MADS box	sjj_W10D5.1	CEPD	Missing fluorescence	11,67	11,67	n.e.	18,33	16,67	n.e.				15	14.17	14.58
odd-2	ZF - C2H2	sjj_C34H3.2	ADF	Missing fluorescence	10	n.e.	10	20	n.e.	15				15	12.5	13.75
sup-35	ZF - C2H2	sjj_Y48A6C.3	CEPV	Missing fluorescence	10	10	n.e.	10	10	n.e.	15	13,33	n.e.	15	11.11	13.06
nfyb-1	CBF	mv_W10D9.4	RIC/RIM	Missing fluorescence	13,33	n.e.	n.e.	15	n.e.	n.e.				14.17	n.e.	n.e.
pha-4	WH - FH	sjj_F38A6.1	HSN	Missing fluorescence	16,67	n.e.	16,67	11,67	n.e.	16,67				14.17	16.67	15.42
vab-7	HD	sjj_M142.4	RIC/RIM	Missing fluorescence	16,67	n.e.	n.e.	11,67	n.e.	n.e.				14.17	n.e.	n.e.
sta-1	STAT	sjj_Y51H4A.17	RIC/RIM	Missing fluorescence	15	n.e.	n.e.	8,33	n.e.	n.e.	12,5	n.e.	n.e.	13.75	n.e.	n.e.
zip-6	bZIP	sjj_R07H5.10	RIC/RIM	Missing fluorescence	16,67	n.e.	n.e.	10	n.e.	n.e.				13.33	n.e.	n.e.
nhr-157	ZF - NHR	sjj_C17E7.5	RIC/RIM	Missing fluorescence	13,33	n.e.	n.e.	5	n.e.	n.e.	12,5	n.e.	n.e.	12.92	n.e.	n.e.
lin-48	ZF - C2H2	mv_F34D10.5	CEPD	Missing fluorescence	10	10	n.e.	15	15	n.e.				12.5	12.5	12.5
unc-55	ZF - NHR	sjj_F55D12.4	CEPD	Missing fluorescence	10	10	n.e.	15	13,33	n.e.				12.5	11.67	12.08
nfx-1	ZF - NF-X1	sjj_C16A3.7	RIC/RIM	Missing fluorescence	15	n.e.	n.e.	9,17	n.e.	n.e.				12.08	n.e.	n.e.
R05D3.3	ZF - C2H2	mv_R05D3.3	RIC/RIM	Missing fluorescence	13,33	n.e.	n.e.	9,17	n.e.	n.e.				11.25	n.e.	n.e.
cey-1	CSD	sjj_F33A8.3	RIC/RIM	Missing fluorescence	11,67	n.e.	n.e.	5	n.e.	n.e.	8,33	n.e.	n.e.	10	n.e.	n.e.
aha-1	bHLH	sjj_C25A1.11	n.a.	Ectopic cells	+	+	-	+	+	-
aha-1	bHLH	sjj_C25A1.11	PDE	Morphology	+	+	n.e.	+	+	n.e.
ahr-1	bHLH	sjj_C41G7.5	n.a.	Ectopic cells	+	-	-	+	-	-
ceh-16	HD	pNF522	n.a.	Ectopic cells*	+	-	-	+	-	-
ceh-20	HD	sjj_F31E3.1	n.a.	Ectopics in head	+	+	-	+	+	-
ceh-31	HD	pNF529	n.a.	Ectopic cells	+	+	-	+	+	-
ceh-32	HD	sjj_W05E10.3	n.a.	Ectopics in head	-	+	-	-	+	-
egl-18	ZF - GATA	sjj_F55A8.1	HSN	Migration	+	n.e.	+	+	n.e.	+
egl-27	ZF - GATA	sjj_C04A2.3	CEPD	Aberrant axon	+	+	n.e.	+	+	n.e.
egl-27	ZF - GATA	sjj_C04A2.3	CEPV	Aberrant axon	+	+	n.e.	+	+	n.e.
egl-27	ZF - GATA	sjj_C04A2.3	HSN	Aberrant axon	+	n.e.	+	+	n.e.	+
fos-1	bZIP	sjj_F29G9.4	n.a.	Ectopics in tail	+	-	-	+	-	-
hbl-1	ZF - C2H2	sjj_F13D11.2	PDE	Aberrant axon	+	+	n.e.	+	+	n.e.
hlh-14	bHLH	pNF495	HSN	Migration	+	n.e.	+	+	n.e.	+
let-381	WH - FH	sjj_F26B1.7	NSM	Aberrant axon	+	n.e.	+	+	n.e.	+
lim-7	HD	mv_C04F1.3	NSM	Aberrant axon	+	n.e.	+	+	n.e.	+
lin-22	bHLH	pNF493	n.a.	Ectopic cells	+	-	-	+	-	-
lin-40	ZF - GATA	sjj_T27C4.4	PDE	Aberrant axon	+	+	n.e.	+	+	n.e.
lin-40	ZF - GATA	sjj_T27C4.4	ADE	Aberrant axon	+	+	n.e.	+	+	n.e.
lin-40	ZF - GATA	sjj_T27C4.4	HSN	Aberrant axon	+	n.e.	+	+	n.e.	+
nob-1	HD	sjj_Y75B8A.2	n.a.	Ectopics in tail	+	+	-	+	+	-
pax-3	HD	sjj_F27E5.2	HSN	Aberrant axon	+	n.e.	+	+	n.e.	+
ref-1	bHLH	sjj_T01E8.2	n.a.	Ectopic cells	+	-	-	+	-	-
spr-3	ZF - C2H2	sjj_C07A12.5	HSN	Aberrant axon	+	n.e.	+	+	n.e.	+
tbx-11	T-box	sjj_F40H6.4	n.a.	Ectopics in head	+	-	-	+	-	-
unc-62	HD	sjj_T28F12.2	n.a.	Ectopics in head and tail	+	-	-	+	-	-
vab-3	HD	sjj_F14F3.1	n.a.	Ectopics in head	+	+	-	+	+	-
xbp-1	bZIP	sjj_R74.3	HSN	Aberrant axon	+	n.e.	+	+	n.e.	+

## Sheet: TFs scored only at P0
Clones scored only at P0
Gene Name	Sequence Name	DBD	MA phenotype
swsn-7	C08B11.3	ARID - RFX	NO
let-526	C01G8.9	ARID/BRIGHT	NO
attf-6	Y18D10A.1	AT Hook x2	NO
wrm-1	B0336.1	Beta-catenin/ARmadillo	Missing VCs
fos-1	F29G9.4	bZIP	Ectopic in tail
zip-10	T27F2.4	bZIP	Missing ADF
let-607	F57B10.1	bZIP (CREB)	NO
lag-1	K08B4.1	CSL	Missing ADF
lin-54	JC8.6	CxC	NO
pal-1	C38D4.6	HD - HOX	NO
php-3	Y75B8A.1	HD - HOX	NO
ceh-20	F31E3.1	HD - TALE	Missing ADE, PDE, VCs and ectopic in head
pop-1	W10C8.2	HMG box	NO
sox-2	K08A8.2	HMG box	NO
swsn-3	Y71H2AM.17	HMG box	NO
hmg-1.2	F47D12.4	HMG box - 2 domains	NO
hmg-5	F45E4.9	HMG box - 2 domains	NO
ekl-4	Y105E8A.17	MYB	NO
swsn-1	Y113G7B.23	MYB	NO
cdc-5L	D1081.8	MYB - 2 domains	NO
snpc-4	F32H2.1	MYB - 5 domains	NO
F19F10.9	F19F10.9	SART-1	NO
tbp-1	T20B12.2	TBP	NO
bed-3	F25H8.6	ZF - BED	Missing PDE
lir-1	F18A1.3	ZF - C2H2 - 1 finger	NO
repo-1	F11A10.2	ZF - C2H2 - 1 finger	NO
somi-1	M04G12.4	ZF - C2H2 - 1 finger	NO
W04D2.4	W04D2.4	ZF - C2H2 - 1 finger	NO
Y56A3A.18	Y56A3A.18	ZF - C2H2 - 1 finger	NO
lin-13	C03B8.4	ZF - C2H2 - 15 fingers	NO
C16A3.4	C16A3.4	ZF - C2H2 - 3 fingers	NO
die-1	C18D1.1	ZF - C2H2 - 3 fingers	NO
pat-9	T27B1.2	ZF - C2H2 - 3 fingers	NO
sptf-3	Y40B1A.4	ZF - C2H2 - 3 fingers	NO
dmd-5	F10C1.5	ZF - DM	NO
elt-2	C33D3.1	ZF - GATA	NO
elt-1	W09C2.1	ZF - GATA - 2 domains	NO

## Sheet: TFs per family
DBD	Number of total Members	Members with phenotype
AP-2	5	0
ARID/BRIGHT	5	0
AT Hook	16	0
β-catenin/armadillo	3	1
bHLH	42	7
Brinker	2	0
bZIP	36	6
CBF	9	2
CENPB	1	0
CP2	1	0
CSD	5	2
CSL	1	1
CxC	2	0
HD	101	24
HMG box	16	1
HTH	3	0
IPT/TIG	2	0
MADF	11	0
MADS box	2	1
MDB	1	0
MH1	7	1
MTERF	2	0
MYB	13	0
p53	3	1
PRD-FULL	3	0
PRD-NPAX	4	0
RNT	1	0
SAND	2	0
SART-1	1	0
STAT	2	1
T-box	22	2
TBP	3	0
TEA/ATTS	1	0
TSC-22/DIB/BUN	3	0
Unknown	2	1
WH	2	1
WH - DAC	1	0
WH - ETS	11	1
WH - FH	15	2
WH - HSF	1	0
WH - RFX	1	0
WH - TDP	4	0
WT1	1	0
YEATS	1	0
ZF - BED	4	1
ZF - C2CH	1	0
ZF - C2H2	191	21
ZF - CCCH	1	0
ZF - DM	11	0
ZF - FLYWCH	4	2
ZF - GATA	14	4
ZF - NF-X1 - 10 domains	1	1
ZF - NHR	272	7
ZF - THAP	5	0
ZF-MIZ	1	0
total	875	91
