# Supplementary material for: Joint actions of diverse transcription factor families establish neuron-type identities and promote enhancer selectivity
Source: HighWire-hosted journal article supplement (doi:10.1101/gr.275623.121), 2022-01-24
Supplement: Supplemental_Table_S3.xlsx [file Supplemental_Table_S3.xlsx]

## Sheet: TFs known to regulate MA
Gene Name	Neuron affected	Confirmed	Type of analysis	Reference
ast-1	CEPs, ADE, PDE, HSN	Yes	Transcriptional reporters, multicopy integrated	(Lloret-Fernández et al. 2018) doi: 10.7554/eLife.32785; ( Flames and Hobert 2009) doi: 10.1038/nature07929
ceh-16	PDE	Yes	Transcriptional reporter, multicopy integrated	(Huang, 2009) doi.org/10.1016/j.ydbio.2009.07.005
ceh-20	CEPs, ADE, PDE, VCs	Yes	Transcriptional reporters, multicopy integrated	(Doitsidou et al. 2013) doi: 10.1101/gad.217224.113; ( Potts, Wang, and Cameron 2009) DOI: 10.1016/j.ydbio.2009.02.022
ceh-43	ADE, CEPV, PDE	Yes	Transcriptional reporters, multicopy integrated	(Doitsidou et al. 2013) doi: 10.1101/gad.217224.113.
daf-19	ADF	No	Transcriptional reporters, multicopy integrated	(Xie et al. 2013) DOI: 10.1371/journal.pgen.1003324
egl-18	HSN	Yes	Transcriptional reporters, multicopy integrated	(Lloret-Fernández et al. 2018) doi: 10.7554/eLife.32785; (Garriga et al. 1993) PMID: 8325236
egl-27	HSN	Yes	Egg-laying defective; serotonin immunostaining	(Desai, 1988) PMID: 3200316; (Garriga et al. 1993) PMID: 8325236
egl-43	HSN	No	Serotonin immunostaining	(Garriga, 1993) PMID: 8224840
egl-46	HSN	Yes	Transcriptional reporters, multicopy integrated	(Lloret-Fernández et al. 2018) doi: 10.7554/eLife.32785
egl-5	HSN	Yes	Transcriptional reporters, multicopy integrated	(Singhvi, Frank, and Garriga 2008) DOI: 10.1534/genetics.108.088948
ham-1	CEPs	Yes	Transcriptional reporters, multicopy integrated	(Teuliere, 2018) doi: 10.1371/journal.pone.0195855; (Doitsidou et al. 2008) doi: 10.1038/nmeth.1250
hlh-14	HSN	Yes	Serotonin immunostaining; Transcriptional reporter, multicopy integrated	(Frank, 2003) DOI: 10.1242/dev.00894
hlh-2	HSN, PDE	No	Transcriptional reporters, multicopy integrated	(Portman and Emmons 2000) PMID: 11076762; (Doistisdou 2018) doi: 10.1534/g3.117.300132.
hlh-3	HSN	Yes	Transcriptional reporters, multicopy integrated	(Lloret-Fernández et al. 2018) doi: 10.7554/eLife.32785
lim-4	ADF	Yes	Transcriptional reporters, multicopy integrated	(Zheng et al. 2005) DOI: 10.1016/j.ydbio.2005.08.013
lin-14	HSN	Yes	Transcriptional reporters, multicopy integrated	(Olsson-Carter, 2010) doi:10.1371/journal.pgen.1001054
lin-22	PDE, ectopic	Yes	α-MAB-5 immunostaining	(Wrischnik, 1997) PMID: 9247331
lin-28	HSN	Yes	Transcriptional reporters, multicopy integrated	(Olsson-Carter, 2010) doi:10.1371/journal.pgen.1001054
lin-32	PDE	Yes	Transcriptional reporters, multicopy extrachromosomal	(Portman and Emmons 2000) PMID: 11076762
lin-39	VCs	Yes	Transcriptional reporters, multicopy integrated	(Potts, Wang, and Cameron 2009) DOI: 10.1016/j.ydbio.2009.02.022
mls-2	PDE	Yes	Transcriptional reporter, multicopy extrachromosomal	(Jiang, 2005) PMID: 16107479
ref-1	ectopic	Yes	Transcriptional reporters, multicopy integrated	(Lanjuin et al. 2006) doi: ﻿10.1016/j.ydbio.2005.11.018
sem-4	HSN	Yes	Transcriptional reporters, multicopy integrated	(Lloret-Fernández et al. 2018) doi: 10.7554/eLife.32785
tbx-2	HSN	No	Transcriptional reporters, multicopy integrated	(Singhvi, Frank, and Garriga 2008) DOI: 10.1534/genetics.108.088948
unc-4	VCs	Yes	Transcriptional reporter, multicopy integrated	(Zheng et al. 2013) DOI: 10.1371/journal.pgen.1004017
unc-86	HSN, NSM	Yes	Transcriptional reporters, multicopy integrated	(Lloret-Fernández et al. 2018) doi: 10.7554/eLife.32785
vab-3	CEPs	Yes	Transcriptional reporters, multicopy integrated	(Doitsidou et al. 2008) doi: 10.1038/nmeth.1250
xbp-1	HSN aberrant axon	Yes	Transcriptional reporter, multicopy extrachromosomal	(Asakura et al. 2015) doi: ﻿﻿10.1111/gtc.12206
zag-1	HSN	No	Transcriptional reporter, multicopy extrachromosomal	(Clark and Chiu 2003) DOI: 10.1242/dev.00571
ztf-11	VCs	No	CRISPR/Cas9 endogenous tagging	(Lee, 2019) DOI: 10.7554/eLife.46703
ztf-6	PDE	No	Transcriptional reporter, multicopy integrated	(Doitsidou, 2018) DOI: 10.1534/g3.117.300132
Comment:
ttx-3 is a terminal selector for NSM fate, however, ttx-3 single mutants do not show defects in cat-1 or tph-1 expression, thus ttx-3 RNAi was not expected to produce any phenotype in our screen
