# Supplementary material for: Joint actions of diverse transcription factor families establish neuron-type identities and promote enhancer selectivity
Source: HighWire-hosted journal article supplement (doi:10.1101/gr.275623.121), 2022-01-24
Supplement: Supplemental_Table_S4.xlsx [file Supplemental_Table_S4.xlsx]

## Sheet: Mutant analysis
Supplementary Table 1
Strain	Genotype	Age	Temp (ºC)	Neuron type	% ON	% FAINT	% OFF	% Extra cells	SEP	N (neurons)	p-value	Comments	Significant
lag-1(q385)
OH8246	otIs221[cat-1p::gfp] III	L1	25	ADF	98	0	2	0	1	100	-
NFB1759	otIs221[cat-1p::gfp] III; lag-1(q385)/dpy-13(e184) unc-24(e138) IV	L1	25	ADF	24	8	68	0	5	100	< 0.0001		Yes
lin-28(n719)
OH8250	otIs225[cat-4p::gfp] II	YA	20	PDE	90	10	0	0	0	100	-
	lin-28(n719) I; otIs225[cat-4p::gfp] II	YA	20	PDE	51	2	47	0	5	100	< 0.0001		Yes
OH8250	otIs225[cat-4p::gfp] II	YA	20	HSN	100	0	0	0	0	100	-	17% HSN show migration defects in lin-28(n719) compared to 2% in wildtype (p-value: 0.0004).
	lin-28(n719) I; otIs225[cat-4p::gfp] II	YA	20	HSN	100	0	0	0	0	100	1000		Yes
lin-40(ku285)
OH8480	otIs221[cat-1p::gfp] III; him-8(e1489) IV	YA	20	VC4/5	100	0	0	0	0	100	-	Statistics comparing OFF cells only.
NFB2384	otIs221[cat-1p::gfp] III; lin-40(ku285) V	YA	20	VC4/5	88	5	7	0	3	100	0.0140		Yes
hlh-14
OH8246	otIs221[cat-1p::gfp] III	L1	25	ADF	95	0	5	0	3	50	-	N=worms, because %ON = % worms with 15 GFP neurons.
NFB1460	hlh-14(gm34)/mnC1 dpy-10(e128) unc-52(e444) II; otIs221[cat-1p::gfp] III	L1	25	ADF	24	0	76	0	6	50	< 0.00001		Yes
NFB1457	hlh-14(ok780)/mIn1 [mIs14 dpy-10(e128)] II; otIs221[cat-1p::gfp] III	L1	25	ADF	40	0	60	0	7	50	< 0.00001		Yes
tra-1(e1488)
OH9279	otIs226[cat-1prom1::mcherry] I	YA	20	VC4/5	96	2	2	0	1	100	-	In tra-1(e1488) mutants VC lineage is masculinized to CP lineage, ad CPS show significant defects on cat-1 expression
NFB2338	otIs226[cat-1prom1::mcherry] I; tra-1(e1488) III; eDp6 (III;f)	YA	20	CPs	53.33	12.33	34.33	0	3	300	< 0.0001		Yes
hbl-1(mg285)
OH8480	otIs221[cat-1p::gfp] III; him-8(e1489) IV	YA	20	PDE	100	0	0	0	0	100	-	Statistics comparing ON cells with OFF and extra cells. In addition, 59% PDE show morphology defects in hbl-1(mg285) compared to 16% in wildtype (p-value: <0.0001).
NFB2340	otIs221[cat-1p::gfp] III; him-8(e1489) IV; hbl-1(mg285) X	YA	20	PDE	91	0	4	5	3	100	0.0032		Yes
OH8480	otIs221[cat-1p::gfp] III; him-8(e1489) IV	YA	20	HSN	94	0	6	0	2	100	-	87% HSN show migration defects in hbl-1(mg285) compared to 0% in wildtype (p-value: <0.0001).
NFB2340	otIs221[cat-1p::gfp] III; him-8(e1489) IV; hbl-1(mg285) X	YA	20	HSN	93	0	7	0	3	100	1000		Yes
vab-15(u781)
OH8480	otIs221[cat-1p::gfp] III; him-8(e1489) IV	YA	20	PDE	99	0	1	0	1	100	-
NFB2385	otIs221[cat-1p::gfp] III; vab-15(u781) X	YA	20	PDE	17	0	83	0	4	100	< 0.0001		Yes
sex-1(y263)
OH8480	otIs221[cat-1p::gfp] III; him-8(e1489) IV	YA	20	ADF	94	0	6	0	2	100	-
NFB2386	otIs221[cat-1p::gfp] III; him-8(e1489) IV; sex-1(y263) X	YA	20	ADF	86	0	14	0	4	100	0.0970		No
OH8480	otIs221[cat-1p::gfp] III; him-8(e1489) IV	YA	20	HSN	98	0	2	0	1	100	-	7% HSN show migration defects in sex-1(y263) compared to 0% in wildtype (p-value: 0.0140).
NFB2386	otIs221[cat-1p::gfp] III; him-8(e1489) IV; sex-1(y263) X	YA	20	HSN	98	0	2	0	1	100	1000		Yes
nob-1(os6)
OH9279	otIs226[cat-1prom1::mcherry] I	YA	20	HSN	0	87	13	0	3	100	-	Statistics comparing OFF cells only.
NFB2387	otIs226[cat-1prom1::mcherry] I; nob-1(os6) III; him-8(e1489) IV	YA	20	HSN	0	95	5	0	2	100	0.0813		No
unc-62(e917)
OH8480	otIs221[cat-1p::gfp] III; him-8(e1489) IV	YA	20	CEPV	100	0	0	0	0	100	-
NFB882	otIs221[cat-1p::gfp] III; unc-62(e917) V	YA	20	CEPV	87	0	13	0	3	100	0.0063		Yes
OH8480	otIs221[cat-1p::gfp] III; him-8(e1489) IV	YA	20	CEPD	100	0	0	0	0	100	-
NFB882	otIs221[cat-1p::gfp] III; unc-62(e917) V	YA	20	CEPD	90	0	10	0	3	100	0.0068		No
OH8480	otIs221[cat-1p::gfp] III; him-8(e1489) IV	YA	20	ADE	98	0	2	0	1	100	-
NFB882	otIs221[cat-1p::gfp] III; unc-62(e917) V	YA	20	ADE	88	0	12	0	3	100	0.0063		Yes
OH8480	otIs221[cat-1p::gfp] III; him-8(e1489) IV	YA	20	PDE	98	0	2	0	1	100	-
NFB882	otIs221[cat-1p::gfp] III; unc-62(e917) V	YA	20	PDE	66	0	34	0	5	100	0.0024		Yes
lin-14(n179)
OH8480	otIs221[cat-1p::gfp] III; him-8(e1489) IV	YA	20	NSM	100	0	0	0	0	100	-
NFB2080	otIs221[cat-1p::gfp] III; lin-14(n179) X	YA	20	NSM	100	0	0	0	0	100	1000		No
OH8480	otIs221[cat-1p::gfp] III; him-8(e1489) IV	YA	20	HSN	100	0	0	0	0	100	-
NFB2080	otIs221[cat-1p::gfp] III; lin-14(n179) X	YA	20	HSN	82	0	18	0	4	100	< 0.0001		Yes
OH8480	otIs221[cat-1p::gfp] III; him-8(e1489) IV	YA	20	PDE	100	0	0	0	0	100	-
NFB2080	otIs221[cat-1p::gfp] III; lin-14(n179) X	YA	20	PDE	47	0	53	0	5	100	< 0.0001		Yes
OH8480	otIs221[cat-1p::gfp] III; him-8(e1489) IV	YA	20	VC4/5	100	0	0	0	0	100	-
NFB2080	otIs221[cat-1p::gfp] III; lin-14(n179) X	YA	20	VC4/5	7	0	93	0	0	100	0.01		Yes
zip-5(gk646)
NFB14	zfIs10[tdc-1p::mcherry] IV	YA	20	RIC	98	0	2	0	0	100	-
NFB1849	zfIs10[tdc-1p::mcherry] IV; zip-5(gk646) V	YA	20	RIC	58	0	42	0	5	100	0.001		Yes
NFB14	zfIs10[tdc-1p::mcherry] IV	YA	20	RIM	95	0	5	0	0	100	-
NFB1849	zfIs10[tdc-1p::mcherry] IV; zip-5(gk646) V	YA	20	RIM	82	0	18	0	4	100	0.0067		Yes
bed-3(gk996)
OH8480	otIs221[cat-1p::gfp] III; him-8(e1489) IV	YA	20	PDE	91	6	3	0	2	100	-
NFB2388	otIs221[cat-1p::gfp] III; bed-3(gk996) IV	YA	20	PDE	49	8	43	0	5	100	< 0.0001		Yes
ceh-44(tm919)
OH9279	otIs226[cat-1prom1::mcherry] I	YA	20	PDE	82	0	8	10	4	100	-	Statistics comparing ON cells with OFF and extra cells.
NFB2389	otIs226[cat-1prom1::mcherry] I; ceh-44(tm919) III	YA	20	PDE	79	0	2	19	4	100	0.7215		No
lin-26(n156)
OH8480	otIs221[cat-1p::gfp] III; him-8(e1489) IV	YA	20	PDE	100	0	0	0	0	100	-	34% PDE show morphology defects in lin-26(n156) compared to 16% in wildtype (p-value: 0.0052).
NFB2390	lin-26(n156) II; otIs221[cat-1p::gfp] III	YA	20	PDE	100	0	0	0	0	100	1000		Yes
nhr-2(tm860)
OH8480	otIs221[cat-1p::gfp] III; him-8(e1489) IV	YA	20	RIC/RIM	98.5	0	1.5	0	1	200	-	RIC and RIM are counted together in a single category.
NFB2391	nhr-2(tm860) I; otIs221[cat-1p::gfp] III	YA	20	RIC/RIM	93.5	0	6.5	0	2	200	0.0188		Yes
ceh-12(tm1619)
OH8480	otIs221[cat-1p::gfp] III; him-8(e1489) IV	YA	20	RIC/RIM	98.5	0	1.5	0	1	200	-	RIC and RIM are counted together in a single category.
NFB2392	ceh-12(tm1619) I; otIs221[cat-1p::gfp] III	YA	20	RIC/RIM	95.5	0	4.5	0	2	200	0.1399		No
zip-10(ok3462)
SK4013	zdIs13[tph-1p::gfp] IV	YA	20	ADF	100	0	0	0	0	100	-
NFB1784	zdIs13[tph-1p::gfp] IV; zip-10(ok3462) V	YA	20	ADF	98	0	2	0	1	100	0.2		No
dro-1(tm4702)
OH8481	otIs226 IV; him-5(e1490)	YA	20	CEPV	100	0	0	0	0	100	-
NFB1993	dro-1 (tm4702) III; eTv1 (III/V); otIs226[bas-1::gfp]IV	YA	20	CEPV	100	0	0	0	0	100	1000		No
OH8481	otIs226 IV; him-5(e1490)	YA	20	CEPD	100	0	0	0	0	100	-
NFB1993	dro-1 (tm4702) III; eTv1 (III/V); otIs226[bas-1::gfp]IV	YA	20	CEPD	100	0	0	0	0	100	0.4975		No
OH8481	otIs226 IV; him-5(e1490)	YA	20	ADE	98	0	2	0	1	100	-
NFB1993	dro-1 (tm4702) III; eTv1 (III/V); otIs226[bas-1::gfp]IV	YA	20	ADE	98	0	2	0	1	100	0.4975		No
OH8481	otIs226 IV; him-5(e1490)	YA	20	PDE	100	0	0	0	0	100	-
NFB1993	dro-1 (tm4702) III; eTv1 (III/V); otIs226[bas-1::gfp]IV	YA	20	PDE	95	0	5	0	2	100	0.0594		No
