# Supplementary material for: Joint actions of diverse transcription factor families establish neuron-type identities and promote enhancer selectivity
Source: HighWire-hosted journal article supplement (doi:10.1101/gr.275623.121), 2022-01-24
Supplement: Supplemental_Table_S5.xlsx [file Supplemental_Table_S5.xlsx]

## Sheet: WormBase neuronal mutants
ID	TF.name	TF.family	Phenotype
WBGene00000095	aha-1	bHLH	motor neuron morphology variant; neurite connectivity defective
WBGene00000096	ahr-1	bHLH	neurite connectivity defective; synaptogenesis variant; motor neuron morphology variant; neuronal cell fate specification variant
WBGene00001851	hif-1	bHLH	axon regeneration defective
WBGene00001957	hlh-13	bHLH	neuron degeneration
WBGene00001960	hlh-16	bHLH	neuronal cell fate specification variant
WBGene00001950	hlh-3	bHLH	serotonin metabolism variant; axon outgrowth variant; ectopic axon outgrowth; neuronal cell fate specification variant
WBGene00001953	hlh-8	bHLH	axon morphology variant; ectopic axon outgrowth
WBGene00003008	lin-22	bHLH	ectopic neuron
WBGene00003018	lin-32	bHLH	dopaminergic fate atypical; male ray morphology variant; chemosensory neuron development variant; neuron cell body absent misplaced
WBGene00004334	ref-1	bHLH	extra and ectopic neuron
WBGene00000793	crh-1	bZIP	neuron calcium transient levels variant
WBGene00003014	lin-28	CSD	axodendritic polarity variant
WBGene00044508	nsy-7	HD	loss of asymmetry AWC
WBGene00001174	egl-5	HD	male tail morphology variant; serotonin deficient; HSN migration variant; neuron cell body absent misplaced; ectopic neuron; male tail sensory ray development variant; male tail development variant; neurite development variant
WBGene00003024	lin-39	HD	neuron activation variant
WBGene00000438	ceh-14	HD	neuronal outgrowth variant; axon outgrowth variant; phasmid neuron dye filling defect
WBGene00002988	lim-6	HD	loss of asymmetry ASE
WBGene00003000	lin-11	HD	neuronal cell fate specification variant; ciliated neuron morphology variant
WBGene00003167	mec-3	HD	neuron development variant; neuron positioning variant; neuron cell body absent misplaced; neuronal outgrowth variant
WBGene00006654	ttx-3	HD	neuron calcium transient levels variant; neuronal cell fate specification variant
WBGene00000445	ceh-22	HD	phasmid neuron dye filling defect
WBGene00000447	ceh-24	HD	neuronal outgrowth variant
WBGene00000450	ceh-28	HD	neuron function reduced
WBGene00000451	ceh-30	HD	ciliated neuron morphology variant
WBGene00000463	ceh-43	HD	dopaminergic fate atypical
WBGene00000584	cog-1	HD	loss of asymmetry ASE
WBGene00003377	mls-2	HD	chemosensory neuron development variant
WBGene00004011	pha-2	HD	axon trajectory variant; axon guidance variant; axon branching variant; neuron positioning variant
WBGene00006881	vab-15	HD	Q neuroblast lineage migration variant; neuron development variant; neuronal cell fate specification variant
WBGene00006818	unc-86	HD	neuron degeneration; axon outgrowth variant; neuron number variant; neuron cell body absent misplaced
WBGene00000435	ceh-10	HD	CAN cell migration variant; neuron development variant; axon outgrowth variant
WBGene00000440	ceh-17	HD	axon development variant; dendrite development variant; axon outgrowth variant; ectopic axon outgrowth
WBGene00000457	ceh-36	HD	chemosensory neuron development variant; loss of asymmetry ASE
WBGene00006744	unc-4	HD	neuronal cell fate specification variant
WBGene00006778	unc-42	HD	axon fasciculation variant
WBGene00006870	vab-3	HD	dopaminergic fate atypical; axon guidance variant; nervous system morphology variant; axon outgrowth variant; male tail development variant; loss of asymmetry AWC; amphid neuron morphology variant; male tail morphology variant
WBGene00006766	unc-30	HD	axon fasciculation variant; neuron morphology variant; axon outgrowth variant
WBGene00000448	pros-1	HD	amphid neuron dye filling defect
WBGene00006775	unc-39	HD	CAN cell migration variant
WBGene00006796	unc-62	HD	male tail morphology variant
WBGene00001182	egl-13	HMG box	egg laying serotonin resistant; neuronal cell fate specification variant
WBGene00001972	hmg-1.2	HMG box	male ray morphology variant
WBGene00004077	pop-1	HMG box	Q neuroblast lineage migration variant; phasmid neuron dye filling defect
WBGene00006743	unc-3	IPT/TIG	extra neuron; neuron development variant; neuron number variant; axon fasciculation variant
WBGene00004856	sma-2	MH1	male tail morphology variant; male ray morphology variant
WBGene00004857	sma-3	MH1	male tail morphology variant; male ray morphology variant
WBGene00004134	myrf-1	p53	synaptic remodeling variant
WBGene00004393	rnt-1	RNT	phasmid neuron dye filling defect; male tail morphology variant; dye filling defect
WBGene00003106	mab-9	T-box	male tail morphology variant; male tail development variant; axon guidance variant
WBGene00006543	tbx-2	T-box	neuron development variant; neuron migration variant; neuron cell body absent misplaced
WBGene00001208	egl-44	TEA/ATTS	axon morphology variant; serotonin deficient; HSN migration variant; axon outgrowth variant; axon trajectory variant
WBGene00006943	wrm-1	β-catenin/armadillo	phasmid neuron dye filling defect
WBGene00000238	bar-1	β-catenin/armadillo	Q neuroblast lineage migration variant; male tail sensory ray development variant; axon branching variant; phasmid neuron dye filling defect
WBGene00001820	ham-1	WH	phasmid neuron morphology variant; HSN migration variant; neuron development variant; neuronal cell fate specification variant; dopaminergic fate atypical; dye filling defect
WBGene00020368	ast-1	WH - ETS	neuronal cell fate specification variant; axon guidance variant; axon fasciculation variant
WBGene00017687	ets-4	WH - ETS	axon regeneration defective
WBGene00016600	ets-5	WH - ETS	neuronal cell fate specification variant
WBGene00000912	daf-16	WH - FH	neurite morphology variant; axon branching variant; axon regeneration defective
WBGene00006853	unc-130	WH - FH	male tail morphology variant; axon guidance variant
WBGene00002004	hsf-1	WH - HSF	neurite morphology variant
WBGene00000914	daf-19	WH - RFX	amphid phasmid neuron morphology variant; male ray morphology variant; synaptogenesis variant; dendrite development variant; neuron activation variant; dye filling defect; amphid neuron dye filling defect
WBGene00001161	efl-1	WH - TDP	neuronal cell fate specification variant
WBGene00001210	egl-46	ZF - C2H2	axon trajectory variant; HSN migration variant; axon outgrowth variant; axon morphology variant; serotonin deficient
WBGene00009743	sptf-1	ZF - C2H2	dye filling defect
WBGene00019407	lect-2	ZF - C2H2	dendrite development variant
WBGene00006580	tlp-1	ZF - C2H2	male tail morphology variant; phasmid neuron morphology variant; Q neuroblast lineage migration variant; neuronal cell fate specification variant; phasmid neuron dye filling defect
WBGene00005009	spr-4	ZF - C2H2	neuron degeneration variant
WBGene00003002	lin-13	ZF - C2H2	neuronal cell fate specification variant
WBGene00001821	ham-2	ZF - C2H2	serotonin deficient; HSN migration variant
WBGene00009834	lsy-27	ZF - C2H2	loss of asymmetry ASE
WBGene00012317	ztf-6	ZF - C2H2	dopaminergic fate atypical
WBGene00000995	die-1	ZF - C2H2	loss of asymmetry ASE; loss of asymmetry AWC
WBGene00004335	ref-2	ZF - C2H2	neuronal cell fate specification variant; extra dopaminergic neuron; fewer glutamatergic neurons; neuron number variant
WBGene00006827	unc-98	ZF - C2H2	nervous system morphology variant
WBGene00000483	che-1	ZF - C2H2	loss of asymmetry ASE; amphid neuron morphology variant
WBGene00003847	blmp-1	ZF - C2H2	axodendritic polarity variant
WBGene00001207	egl-43	ZF - C2H2	HSN migration variant; neuron development variant
WBGene00044068	syd-9	ZF - C2H2	axon fasciculation variant; presynaptic vesicle cluster localization variant; evoked postsynaptic amplitude reduced; endogenous synaptic event frequency reduced; presynaptic vesicle number reduced; axon branching variant
WBGene00003909	pag-3	ZF - C2H2	axon guidance variant
WBGene00003087	lsy-2	ZF - C2H2	loss of asymmetry ASE
WBGene00003015	lin-29	ZF - C2H2	egg laying serotonin resistant; axodendritic polarity variant
WBGene00004773	sem-4	ZF - C2H2	male tail morphology variant; axon development variant; axon outgrowth variant; male tail development variant
WBGene00001824	hbl-1	ZF - C2H2	presynaptic component localization variant; synaptic remodeling variant
WBGene00001186	egl-18	ZF - GATA	male tail morphology variant; HSN migration variant
WBGene00001310	end-1	ZF - GATA	neuron morphology variant; neuron degeneration enhanced
WBGene00001194	egl-27	ZF - GATA	Q neuroblast lineage migration variant; neuron development variant; phasmid neuron dye filling defect; HSN migration variant; male ray morphology variant; egg laying serotonin resistant
WBGene00003854	odr-7	ZF - NHR	neuronal cell fate specification variant
WBGene00003657	nhr-67	ZF - NHR	neuronal cell fate specification variant; loss of asymmetry ASE; dendrite development variant
WBGene00000908	daf-12	ZF - NHR	axon guidance variant
WBGene00003623	nhr-25	ZF - NHR	phasmid neuron dye filling defect
WBGene00006790	unc-55	ZF - NHR	GABA synaptic transmission variant; neuromuscular synaptic transmission variant; presynaptic component localization variant; endogenous synaptic event frequency reduced; axodendritic polarity variant; synaptic remodeling variant; postsynaptic component localization variant
WBGene00001400	fax-1	ZF - NHR	axon fasciculation variant; axon guidance variant; axon regeneration defective
WBGene00003003	lin-14	Unknown	synaptic remodeling variant
