# Supplementary material for: Joint actions of diverse transcription factor families establish neuron-type identities and promote enhancer selectivity
Source: HighWire-hosted journal article supplement (doi:10.1101/gr.275623.121), 2022-01-24
Supplement: Supplemental_Table_S6.xlsx [file Supplemental_Table_S6.xlsx]

## Sheet: TF genomic Drosophila
ID	TF.name	TF.family
FBgn0014135	bnl	Others
FBgn0261953	TfAP-2	Others
FBgn0004795	retn	Others
FBgn0261113	Xrp1	Others
FBgn0015602	BEAF-32	ZF
FBgn0015664	Dref	ZF
FBgn0000022	ac	bHLH
FBgn0003270	amos	bHLH
FBgn0000137	ase	bHLH
FBgn0010433	ato	bHLH
FBgn0039509	bigmax	bHLH
FBgn0024249	cato	bHLH
FBgn0053557	CG33557	bHLH
FBgn0023076	Clk	bHLH
FBgn0001994	crp	bHLH
FBgn0259938	cwo	bHLH
FBgn0023094	cyc	bHLH
FBgn0267821	da	bHLH
FBgn0023091	dimm	bHLH
FBgn0262656	Myc	bHLH
FBgn0010109	dpn	bHLH
FBgn0039411	dysf	bHLH
FBgn0002609	E(spl)m3-HLH	bHLH
FBgn0002631	E(spl)m5-HLH	bHLH
FBgn0002633	E(spl)m7-HLH	bHLH
FBgn0000591	E(spl)m8-HLH	bHLH
FBgn0002733	E(spl)mbeta-HLH	bHLH
FBgn0002734	E(spl)mdelta-HLH	bHLH
FBgn0002735	E(spl)mgamma-HLH	bHLH
FBgn0037475	Fer1	bHLH
FBgn0038402	Fer2	bHLH
FBgn0037937	Fer3	bHLH
FBgn0001168	h	bHLH
FBgn0032209	Hand	bHLH
FBgn0030899	Hesr	bHLH
FBgn0027788	Hey	bHLH
FBgn0261283	SREBP	bHLH
FBgn0011277	HLH4C	bHLH
FBgn0022740	HLH54F	bHLH
FBgn0002561	l(1)sc	bHLH
FBgn0017578	Max	bHLH
FBgn0002723	Met	bHLH
FBgn0032940	Mondo	bHLH
FBgn0263112	Mitf	bHLH
FBgn0023215	Mnt	bHLH
FBgn0002922	nau	bHLH
FBgn0002931	net	bHLH
FBgn0032651	Oli	bHLH
FBgn0037672	sage	bHLH
FBgn0004170	sc	bHLH
FBgn0032741	Sidpn	bHLH
FBgn0004666	sim	bHLH
FBgn0003513	ss	bHLH
FBgn0041092	tai	bHLH
FBgn0015550	tap	bHLH
FBgn0264075	tgo	bHLH
FBgn0003900	twi	bHLH
FBgn0263118	tx	bHLH
FBgn0029711	Usf	bHLH
FBgn0024250	brk	Others
FBgn0265193	Atf-2	bZIP
FBgn0028550	Atf3	bZIP
FBgn0033010	Atf6	bZIP
FBgn0032202	REPTOR-BP	bZIP
FBgn0036126	Irbp18	bZIP
FBgn0034096	CG7786	bZIP
FBgn0000370	crc	bZIP
FBgn0004396	CrebA	bZIP
FBgn0265784	CrebB	bZIP
FBgn0262975	cnc	bZIP
FBgn0001150	gt	bZIP
FBgn0001291	Jra	bZIP
FBgn0001297	kay	bZIP
FBgn0016694	Pdp1	bZIP
FBgn0005638	slbo	bZIP
FBgn0000964	tj	bZIP
FBgn0016076	vri	bZIP
FBgn0021872	Xbp1	bZIP
FBgn0264442	ab	ZF
FBgn0005694	Aef1	ZF
FBgn0035625	Blimp-1	ZF
FBgn0004893	bowl	ZF
FBgn0283451	br	ZF
FBgn0000233	btd	ZF
FBgn0025679	Klf15	ZF
FBgn0043364	cbt	ZF
FBgn0000286	Cf2	ZF
FBgn0036294	CG10654	ZF
FBgn0043796	CG12219	ZF
FBgn0029822	CG12236	ZF
FBgn0035481	CG12605	ZF
FBgn0033252	CG12769	ZF
FBgn0037317	CG14667	ZF
FBgn0038549	Nnk	ZF
FBgn0262636	dati	ZF
FBgn0034946	CG3065	ZF
FBgn0051388	CG31388	ZF
FBgn0031573	CG3407	ZF
FBgn0261705	CG42741	ZF
FBgn0038787	CG4360	ZF
FBgn0038765	CG4424	ZF
FBgn0038766	CG4854	ZF
FBgn0036179	CG7368	ZF
FBgn0035691	CG7386	ZF
FBgn0039740	ZIPIC	ZF
FBgn0037617	nom	ZF
FBgn0037722	CG8319	ZF
FBgn0004859	ci	ZF
FBgn0032979	Clamp	ZF
FBgn0020309	crol	ZF
FBgn0035769	CTCF	ZF
FBgn0022935	D19A	ZF
FBgn0022699	D19B	ZF
FBgn0263239	dar1	ZF
FBgn0031375	erm	ZF
FBgn0287768	esg	ZF
FBgn0004652	fru	ZF
FBgn0004618	gl	ZF
FBgn0001180	hb	ZF
FBgn0001185	her	ZF
FBgn0261434	hkb	ZF
FBgn0027339	jim	ZF
FBgn0035144	Kah	ZF
FBgn0011236	ken	ZF
FBgn0013469	klu	ZF
FBgn0001325	Kr	ZF
FBgn0265276	l(3)neo38	ZF
FBgn0039039	lmd	ZF
FBgn0283521	lola	ZF
FBgn0040765	luna	ZF
FBgn0267033	mamo	ZF
FBgn0002985	odd	ZF
FBgn0003002	opa	ZF
FBgn0003028	ovo	ZF
FBgn0038418	pad	ZF
FBgn0003053	peb	ZF
FBgn0002521	pho	ZF
FBgn0035997	phol	ZF
FBgn0034878	pita	ZF
FBgn0267337	rn	ZF
FBgn0004880	scrt	ZF
FBgn0002573	sens	ZF
FBgn0051632	sens-2	ZF
FBgn0028991	seq	ZF
FBgn0003396	shn	ZF
FBgn0003448	sna	ZF
FBgn0004892	sob	ZF
FBgn0020378	Sp1	ZF
FBgn0039169	Spps	ZF
FBgn0010768	sqz	ZF
FBgn0003499	sr	ZF
FBgn0003511	Sry-beta	ZF
FBgn0003567	su(Hw)	ZF
FBgn0033782	sug	ZF
FBgn0013263	Trl	ZF
FBgn0003870	ttk	ZF
FBgn0259789	zld	ZF
FBgn0001983	wor	ZF
FBgn0037446	Zif	ZF
FBgn0039283	danr	Others
FBgn0035626	lin-28	Others
FBgn0004837	Su(H)	Others
FBgn0004198	ct	HD
FBgn0028996	onecut	HD
FBgn0038851	dmrt93B	Others
FBgn0000504	dsx	Others
FBgn0011766	E2f1	Others
FBgn0001319	kn	Others
FBgn0000097	aop	Others
FBgn0000567	Eip74EF	Others
FBgn0005660	Ets21C	Others
FBgn0005658	Ets65A	Others
FBgn0039225	Ets96B	Others
FBgn0004510	Ets97D	Others
FBgn0005659	Ets98B	Others
FBgn0003118	pnt	Others
FBgn0045759	bin	Others
FBgn0029504	CHES-1-like	Others
FBgn0014143	croc	Others
FBgn0039937	fd102C	Others
FBgn0004896	fd59A	Others
FBgn0004895	FoxL1	Others
FBgn0004897	fd96Ca	Others
FBgn0000659	fkh	Others
FBgn0038197	foxo	Others
FBgn0262477	FoxP	Others
FBgn0015396	jumu	Others
FBgn0003430	slp1	Others
FBgn0004567	slp2	Others
FBgn0032223	GATAd	Others
FBgn0038391	GATAe	Others
FBgn0001138	grn	Others
FBgn0003117	pnr	Others
FBgn0003507	srp	Others
FBgn0014179	gcm	Others
FBgn0019809	gcm2	Others
FBgn0050011	gem	Others
FBgn0259211	grh	Others
FBgn0000014	abd-A	HD
FBgn0000015	Abd-B	HD
FBgn0033749	achi	HD
FBgn0000061	al	HD
FBgn0260642	Antp	HD
FBgn0267978	ap	HD
FBgn0015904	ara	HD
FBgn0013751	Awh	HD
FBgn0011758	B-H1	HD
FBgn0004854	B-H2	HD
FBgn0004862	bap	HD
FBgn0000166	bcd	HD
FBgn0000529	bsh	HD
FBgn0014949	btn	HD
FBgn0004863	C15	HD
FBgn0000251	cad	HD
FBgn0015919	caup	HD
FBgn0030408	CG11085	HD
FBgn0030058	CG11294	HD
FBgn0031232	CG11617	HD
FBgn0038833	CG15696	HD
FBgn0038592	CG18599	HD
FBgn0085369	Drgx	HD
FBgn0052105	Lmx1a	HD
FBgn0052532	CG32532	HD
FBgn0054031	CG34031	HD
FBgn0036274	CG4328	HD
FBgn0085396	CG34367	HD
FBgn0034821	CG9876	HD
FBgn0261723	Dbx	HD
FBgn0000439	Dfd	HD
FBgn0000157	Dll	HD
FBgn0000492	Dr	HD
FBgn0020307	dve	HD
FBgn0008646	E5	HD
FBgn0000576	ems	HD
FBgn0000577	en	HD
FBgn0000606	eve	HD
FBgn0000611	exd	HD
FBgn0041156	exex	HD
FBgn0001077	ftz	HD
FBgn0010323	Gsc	HD
FBgn0001170	H2.0	HD
FBgn0008636	hbn	HD
FBgn0040318	HGTX	HD
FBgn0038852	HHEX	HD
FBgn0264005	Hmx	HD
FBgn0001235	hth	HD
FBgn0025776	ind	HD
FBgn0001269	inv	HD
FBgn0002522	lab	HD
FBgn0011278	lbe	HD
FBgn0008651	lbl	HD
FBgn0026411	Lim1	HD
FBgn0002023	Lim3	HD
FBgn0034520	lms	HD
FBgn0014343	mirr	HD
FBgn0024321	NK7.1	HD
FBgn0004102	oc	HD
FBgn0026058	OdsH	HD
FBgn0025360	Optix	HD
FBgn0015524	otp	HD
FBgn0051481	pb	HD
FBgn0261588	pdm3	HD
FBgn0025334	PHDP	HD
FBgn0023489	Pph13	HD
FBgn0020912	Ptx1	HD
FBgn0011701	repo	HD
FBgn0003267	ro	HD
FBgn0020617	Rx	HD
FBgn0040918	schlank	HD
FBgn0003339	Scr	HD
FBgn0287186	scro	HD
FBgn0027364	Six4	HD
FBgn0002941	slou	HD
FBgn0003460	so	HD
FBgn0004110	tin	HD
FBgn0003896	tup	HD
FBgn0003944	Ubx	HD
FBgn0024184	unc-4	HD
FBgn0015561	unpg	HD
FBgn0033748	vis	HD
FBgn0261930	vnd	HD
FBgn0263511	Vsx1	HD
FBgn0263512	Vsx2	HD
FBgn0004053	zen	HD
FBgn0004054	zen2	HD
FBgn0005558	ey	HD
FBgn0000625	eyg	HD
FBgn0001148	gsb	HD
FBgn0001147	gsb-n	HD
FBgn0003145	prd	HD
FBgn0036285	toe	HD
FBgn0019650	toy	HD
FBgn0000028	acj6	HD
FBgn0085424	nub	HD
FBgn0004394	pdm2	HD
FBgn0086680	vvl	HD
FBgn0001222	Hsf	Others
FBgn0284249	Adf1	Others
FBgn0034945	CG10904	Others
FBgn0039733	CG11504	Others
FBgn0029957	CG12155	Others
FBgn0037206	CG12768	Others
FBgn0030673	CG15601	Others
FBgn0032130	brwl	Others
FBgn0036423	CG3919	Others
FBgn0030432	CG4404	Others
FBgn0043457	CG5180	Others
FBgn0032587	CG5953	Others
FBgn0038316	CG6276	Others
FBgn0033616	CG7745	Others
FBgn0035824	CG8281	Others
FBgn0036900	CG8765	Others
FBgn0263240	Coop	Others
FBgn0040465	Dlip3	Others
FBgn0034599	hng1	Others
FBgn0035160	hng3	Others
FBgn0039350	jigr1	Others
FBgn0037207	Mes2	Others
FBgn0004101	bs	Others
FBgn0011656	Mef2	Others
FBgn0086908	egg	Others
FBgn0002914	Myb	Others
FBgn0004050	z	Others
FBgn0001978	stc	Others
FBgn0015381	dsf	NHR
FBgn0000546	EcR	NHR
FBgn0000560	eg	NHR
FBgn0000568	Eip75B	NHR
FBgn0004865	Eip78C	NHR
FBgn0035849	ERR	NHR
FBgn0001078	ftz-f1	NHR
FBgn0004914	Hnf4	NHR
FBgn0014859	Hr38	NHR
FBgn0261239	Hr39	NHR
FBgn0264562	Hr4	NHR
FBgn0000448	Hr3	NHR
FBgn0034012	Hr51	NHR
FBgn0015239	Hr78	NHR
FBgn0037436	Hr83	NHR
FBgn0015240	Hr96	NHR
FBgn0001320	kni	NHR
FBgn0001323	knrl	NHR
FBgn0003651	svp	NHR
FBgn0003720	tll	NHR
FBgn0003964	usp	NHR
FBgn0003129	Poxm	Others
FBgn0003130	Poxn	Others
FBgn0005561	sv	Others
FBgn0004870	bab1	Others
FBgn0263108	BtbVII	Others
FBgn0264490	Eip93F	Others
FBgn0035405	CG15812	Others
FBgn0003254	rib	Others
FBgn0011274	Dif	Others
FBgn0260632	dl	Others
FBgn0014018	Rel	Others
FBgn0020379	Rfx	Others
FBgn0002576	lz	Others
FBgn0003300	run	Others
FBgn0013799	Deaf1	Others
FBgn0011648	Mad	Others
FBgn0011655	Med	Others
FBgn0042696	NfI	Others
FBgn0024251	bbx	Others
FBgn0038979	tHMG2	Others
FBgn0262582	cic	Others
FBgn0000411	D	Others
FBgn0085432	pan	Others
FBgn0039938	Sox102F	Others
FBgn0005612	Sox14	Others
FBgn0005613	Sox15	Others
FBgn0036411	Sox21a	Others
FBgn0042630	Sox21b	Others
FBgn0029123	SoxN	Others
FBgn0038805	TFAM	Others
FBgn0016917	Stat92E	Others
FBgn0011723	byn	Others
FBgn0035956	Doc2	Others
FBgn0035954	Doc3	Others
FBgn0261963	mid	Others
FBgn0021767	org-1	Others
FBgn0003345	sd	Others
FBgn0038273	CG14860	Others
FBgn0035407	Asciz	Others
FBgn0000139	ash2	Others
FBgn0013753	Bgb	Others
FBgn0039370	CG4956	Others
FBgn0032016	Mettl14	Others
FBgn0043002	Chrac-14	Others
FBgn0000459	disco	Others
FBgn0285879	disco-r	Others
FBgn0034534	maf-S	Others
FBgn0266411	sima	Others
FBgn0032321	YL-1	Others
FBgn0000412	D1	Others
FBgn0011276	HLH3B	bHLH
FBgn0263772	CG43689	ZF
FBgn0035993	Nf-YA	Others
FBgn0039286	dan	Others
FBgn0022959	yps	Others
FBgn0037659	Kdm2	Others
FBgn0030477	dmrt11E	Others
FBgn0011763	Dp	Others
FBgn0024371	E2f2	Others
FBgn0031086	fd19B	Others
FBgn0036134	FoxK	Others
FBgn0004898	fd96Cb	Others
FBgn0265574	Cdc5	Others
FBgn0025525	bab2	Others
FBgn0037445	CG9727	Others
FBgn0083981	RunxA	Others
FBgn0259162	RunxB	Others
FBgn0038978	tHMG1	Others
FBgn0010228	HmgZ	Others
FBgn0024288	Sox100B	Others
FBgn0000179	bi	Others
FBgn0028789	Doc1	Others
FBgn0016660	H15	Others
FBgn0003687	Tbp	Others
FBgn0033846	mip120	Others
FBgn0031715	tomb	Others
FBgn0029891	Pink1	Others
FBgn0050077	Blos1	Others
FBgn0085451	htk	Others
FBgn0036004	Jarid2	Others
FBgn0031759	Kdm5	Others
FBgn0261885	osa	Others
FBgn0042085	Bap170	Others
FBgn0029717	CG12684	ZF
FBgn0031874	CG13775	ZF
FBgn0040392	CG14050	ZF
FBgn0039712	CG15514	ZF
FBgn0034099	CG15708	ZF
FBgn0028931	CG16863	ZF
FBgn0038472	CG3995	ZF
FBgn0034814	CG9890	ZF
FBgn0000575	emc	bHLH
FBgn0261703	gce	bHLH
FBgn0262139	trh	bHLH
FBgn0000228	Bsg25D	bZIP
FBgn0039209	REPTOR	bZIP
FBgn0039505	CG5934	bZIP
FBgn0033081	geminin	bZIP
FBgn0261015	Pif1A	bZIP
FBgn0086362	spn-F	bZIP
FBgn0039946	ATbp	ZF
FBgn0000289	cg	ZF
FBgn0035702	CG10147	ZF
FBgn0035690	CG10274	ZF
FBgn0034643	CG10321	ZF
FBgn0032707	CG10348	ZF
FBgn0032814	CG10366	ZF
FBgn0032815	CG10462	ZF
FBgn0034570	CG10543	ZF
FBgn0039329	CG10669	ZF
FBgn0030010	CG10959	ZF
FBgn0037120	CG11247	ZF
FBgn0040366	CG11398	ZF
FBgn0035024	CG11414	ZF
FBgn0037031	CG11456	ZF
FBgn0030316	CG11695	ZF
FBgn0037618	ouib	ZF
FBgn0028647	CG11902	ZF
FBgn0286204	ich	ZF
FBgn0035137	CG1233	ZF
FBgn0033581	CG12391	ZF
FBgn0033459	CG12744	ZF
FBgn0033569	CG12942	ZF
FBgn0032150	CG13123	ZF
FBgn0035643	CG13287	ZF
FBgn0035687	Prdm13	ZF
FBgn0039201	DZIP1	ZF
FBgn0029895	CG14441	ZF
FBgn0037275	CG14655	ZF
FBgn0037920	CG14710	ZF
FBgn0037922	CG14711	ZF
FBgn0034379	CG15073	ZF
FBgn0028878	CG15269	ZF
FBgn0031144	CG1529	ZF
FBgn0030009	CG15336	ZF
FBgn0031610	Paris	ZF
FBgn0031155	CG15446	ZF
FBgn0034120	CG15710	ZF
FBgn0039602	CG1647	ZF
FBgn0033449	CG1663	ZF
FBgn0037698	CG16779	ZF
FBgn0028895	CG17328	ZF
FBgn0036396	CG17359	ZF
FBgn0036395	CG17361	ZF
FBgn0033934	CG17385	ZF
FBgn0032763	CG17568	ZF
FBgn0031597	CG17612	ZF
FBgn0038550	CG17801	ZF
FBgn0038547	CG17803	ZF
FBgn0038548	CG17806	ZF
FBgn0025635	CG17829	ZF
FBgn0039860	CG1792	ZF
FBgn0033491	CG18011	ZF
FBgn0036725	CG18265	ZF
FBgn0037931	CG18476	ZF
FBgn0042205	CG18764	ZF
FBgn0030003	CG2116	ZF
FBgn0030005	CG2120	ZF
FBgn0035213	CG2199	ZF
FBgn0030240	CG2202	ZF
FBgn0014931	CG2678	ZF
FBgn0024975	CG2712	ZF
FBgn0030206	CG2889	ZF
FBgn0050020	CG30020	ZF
FBgn0050431	CG30431	ZF
FBgn0051224	CG31224	ZF
FBgn0051365	CG31365	ZF
FBgn0051441	CG31441	ZF
FBgn0052121	CG32121	ZF
FBgn0052767	CG32767	ZF
FBgn0052772	CG32772	ZF
FBgn0260741	CG3281	ZF
FBgn0029867	CG3847	ZF
FBgn0261561	CG42675	ZF
FBgn0261679	CG42726	ZF
FBgn0034114	CG4282	ZF
FBgn0030455	CG4318	ZF
FBgn0039078	CG4374	ZF
FBgn0264744	CG44002	ZF
FBgn0031894	CG4496	ZF
FBgn0035036	CG4707	ZF
FBgn0039355	CG4730	ZF
FBgn0037876	CG4820	ZF
FBgn0038768	CG4936	ZF
FBgn0038047	CG5245	ZF
FBgn0037794	CG6254	ZF
FBgn0037918	CG6791	ZF
FBgn0037921	Zaf1	ZF
FBgn0037923	CG6813	ZF
FBgn0030963	CG7101	ZF
FBgn0038551	Odj	ZF
FBgn0036522	Phs	ZF
FBgn0038626	CG7691	ZF
FBgn0037584	CG7963	ZF
FBgn0038244	CG7987	ZF
FBgn0033993	CG8089	ZF
FBgn0037619	CG8159	ZF
FBgn0037717	CG8301	ZF
FBgn0034062	CG8388	ZF
FBgn0037746	CG8478	ZF
FBgn0030659	CG9215	ZF
FBgn0030787	CG9609	ZF
FBgn0029939	CG9650	ZF
FBgn0086758	chinmo	ZF
FBgn0015371	chn	ZF
FBgn0015025	CkIIalpha-i1	ZF
FBgn0000283	Cp190	ZF
FBgn0024244	drm	ZF
FBgn0000520	dwg	ZF
FBgn0260243	E(var)3-9	ZF
FBgn0004858	elB	ZF
FBgn0285971	prg	ZF
FBgn0001133	grau	ZF
FBgn0045852	ham	ZF
FBgn0026575	hang	ZF
FBgn0041205	key	ZF
FBgn0266450	Kr-h1	ZF
FBgn0037621	M1BP	ZF
FBgn0035357	MEP-1	ZF
FBgn0034240	MESR4	ZF
FBgn0263490	mld	ZF
FBgn0040305	MTF-1	ZF
FBgn0028999	nerfin-1	ZF
FBgn0041105	nerfin-2	ZF
FBgn0037085	Neu2	ZF
FBgn0005771	noc	ZF
FBgn0284250	Oaz	ZF
FBgn0050443	Opbp	ZF
FBgn0032401	Plzf	ZF
FBgn0259785	pzg	ZF
FBgn0037620	ranshi	ZF
FBgn0261648	salm	ZF
FBgn0000287	salr	ZF
FBgn0003512	Sry-delta	ZF
FBgn0037751	topi	ZF
FBgn0038767	trem	ZF
FBgn0003866	tsh	ZF
FBgn0003963	ush	ZF
FBgn0005642	wdn	ZF
FBgn0001990	wek	ZF
FBgn0270924	zf30C	ZF
FBgn0004606	zfh1	HD
FBgn0004607	zfh2	HD
FBgn0033186	CG1602	ZF
FBgn0033185	CG1603	ZF
FBgn0030680	CG8944	ZF
FBgn0267792	rgr	ZF
FBgn0032730	CG10431	ZF
FBgn0037877	CG6689	ZF
FBgn0028387	chm	ZF
FBgn0017414	cag	Others
FBgn0035158	CG13895	Others
FBgn0050401	dany	Others
FBgn0035153	ebd1	Others
FBgn0037076	ebd2	Others
FBgn0287478	Camta	Others
FBgn0036661	CG9705	Others
FBgn0263352	Unr	Others
FBgn0030121	Cfp1	Others
FBgn0263392	Tet	Others
FBgn0085405	CG34376	Others
FBgn0250732	gfzf	Others
FBgn0002781	mod(mdg4)	Others
FBgn0052006	CG32006	Others
FBgn0021738	Crg-1	Others
FBgn0264954	fd3F	Others
FBgn0027951	MTA1-like	Others
FBgn0034667	comr	Others
FBgn0026573	ADD1	Others
FBgn0033960	CG10151	Others
FBgn0032858	CG10949	Others
FBgn0031391	CG11723	Others
FBgn0030952	CG12609	Others
FBgn0033627	CG13204	Others
FBgn0039462	CG14252	Others
FBgn0031351	CG14352	Others
FBgn0050403	CG30403	Others
FBgn0050428	CG30428	Others
FBgn0051627	CG31627	Others
FBgn0034961	CG3163	Others
FBgn0053017	CG33017	Others
FBgn0035152	CG3386	Others
FBgn0030418	CG4004	Others
FBgn0266441	CG45071	Others
FBgn0036155	CG6163	Others
FBgn0036152	Dyro	Others
FBgn0035902	CG6683	Others
FBgn0030664	CG8119	Others
FBgn0035721	CG9948	Others
FBgn0001206	Hmr	Others
FBgn0037634	hng2	Others
FBgn0011335	vers	Others
FBgn0036248	ssp	Others
FBgn0003459	stwl	Others
FBgn0027950	MBD-like	Others
FBgn0016754	sba	Others
FBgn0033636	tou	Others
FBgn0038016	MBD-R2	Others
FBgn0031419	CG15390	Others
FBgn0037008	mTerf3	Others
FBgn0038584	mTerf5	Others
FBgn0028530	mTTF	Others
FBgn0031876	Atac1	Others
FBgn0037051	CG10565	Others
FBgn0037540	Pbp95	Others
FBgn0034985	CG3328	Others
FBgn0035518	CG15011	Others
FBgn0039044	p53	Others
FBgn0029824	CG3726	Others
FBgn0266129	lov	Others
FBgn0263102	psq	Others
FBgn0004595	pros	Others
FBgn0030505	NFAT	Others
FBgn0031440	CG15395	Others
FBgn0020493	Dad	Others
FBgn0025800	Smox	Others
FBgn0035238	CG12104	Others
FBgn0039707	Prtl99C	Others
FBgn0050356	CG30356	Others
FBgn0030093	Bap111	Others
FBgn0278608	Dsp1	Others
FBgn0026582	Hmg-2	Others
FBgn0004362	HmgD	Others
FBgn0013300	ProtA	Others
FBgn0013301	ProtB	Others
FBgn0039227	polybromo	Others
FBgn0010278	Ssrp	Others
FBgn0031446	Trf5	Others
FBgn0031444	Trf4	Others
FBgn0010287	Trf	Others
FBgn0261793	Trf2	Others
FBgn0026263	bip1	Others
FBgn0032817	CG10631	Others
FBgn0035157	CG13894	Others
FBgn0036193	CG14135	Others
FBgn0035414	CG14965	Others
FBgn0040466	Dlip2	Others

## Sheet: TF genomic Mouse
ID	TF.name	TF.family
ENSMUSG00000021359	Tfap2a	Others
ENSMUSG00000025927	Tfap2b	Others
ENSMUSG00000028640	Tfap2c	Others
ENSMUSG00000042477	Tfap2e	Others
ENSMUSG00000019564	Arid3a	Others
ENSMUSG00000004661	Arid3b	Others
ENSMUSG00000037447	Arid5a	Others
ENSMUSG00000019947	Arid5b	Others
ENSMUSG00000026491	Ahctf1	Others
ENSMUSG00000056758	Hmga2	Others
ENSMUSG00000058318	Phf21a	Others
ENSMUSG00000024548	Setbp1	Others
ENSMUSG00000019256	Ahr	bHLH
ENSMUSG00000015522	Arnt	bHLH
ENSMUSG00000015709	Arnt2	bHLH
ENSMUSG00000055116	Arntl	bHLH
ENSMUSG00000020052	Ascl1	bHLH
ENSMUSG00000009248	Ascl2	bHLH
ENSMUSG00000073043	Atoh1	bHLH
ENSMUSG00000052271	Bhlha15	bHLH
ENSMUSG00000025128	Bhlhe22	bHLH
ENSMUSG00000030103	Bhlhe40	bHLH
ENSMUSG00000030256	Bhlhe41	bHLH
ENSMUSG00000029238	Clock	bHLH
ENSMUSG00000030001	Figla	bHLH
ENSMUSG00000037335	Hand1	bHLH
ENSMUSG00000022528	Hes1	bHLH
ENSMUSG00000028940	Hes2	bHLH
ENSMUSG00000048001	Hes5	bHLH
ENSMUSG00000023781	Hes7	bHLH
ENSMUSG00000019789	Hey2	bHLH
ENSMUSG00000021109	Hif1a	bHLH
ENSMUSG00000004328	Hif3a	bHLH
ENSMUSG00000034041	Lyl1	bHLH
ENSMUSG00000059436	Max	bHLH
ENSMUSG00000035158	Mitf	bHLH
ENSMUSG00000017801	Mlx	bHLH
ENSMUSG00000038342	Mlxip	bHLH
ENSMUSG00000000282	Mnt	bHLH
ENSMUSG00000025930	Msc	bHLH
ENSMUSG00000047002	Msgn1	bHLH
ENSMUSG00000025025	Mxi1	bHLH
ENSMUSG00000022346	Myc	bHLH
ENSMUSG00000037169	Mycn	bHLH
ENSMUSG00000000435	Myf5	bHLH
ENSMUSG00000035923	Myf6	bHLH
ENSMUSG00000009471	Myod1	bHLH
ENSMUSG00000026459	Myog	bHLH
ENSMUSG00000034701	Neurod1	bHLH
ENSMUSG00000038255	Neurod2	bHLH
ENSMUSG00000048904	Neurog1	bHLH
ENSMUSG00000027967	Neurog2	bHLH
ENSMUSG00000051251	Nhlh1	bHLH
ENSMUSG00000048540	Nhlh2	bHLH
ENSMUSG00000026077	Npas2	bHLH
ENSMUSG00000039830	Olig2	bHLH
ENSMUSG00000045591	Olig3	bHLH
ENSMUSG00000026735	Ptf1a	bHLH
ENSMUSG00000027794	Sohlh2	bHLH
ENSMUSG00000020538	Srebf1	bHLH
ENSMUSG00000022463	Srebf2	bHLH
ENSMUSG00000028717	Tal1	bHLH
ENSMUSG00000032228	Tcf12	bHLH
ENSMUSG00000045680	Tcf21	bHLH
ENSMUSG00000020167	Tcf3	bHLH
ENSMUSG00000053477	Tcf4	bHLH
ENSMUSG00000038932	Tcfl5	bHLH
ENSMUSG00000005718	Tfap4	bHLH
ENSMUSG00000000134	Tfe3	bHLH
ENSMUSG00000023990	Tfeb	bHLH
ENSMUSG00000029553	Tfec	bHLH
ENSMUSG00000035799	Twist1	bHLH
ENSMUSG00000007805	Twist2	bHLH
ENSMUSG00000026641	Usf1	bHLH
ENSMUSG00000058239	Usf2	bHLH
ENSMUSG00000023027	Atf1	bZIP
ENSMUSG00000027104	Atf2	bZIP
ENSMUSG00000026628	Atf3	bZIP
ENSMUSG00000042406	Atf4	bZIP
ENSMUSG00000099083	Atf7	bZIP
ENSMUSG00000025612	Bach1	bZIP
ENSMUSG00000040270	Bach2	bZIP
ENSMUSG00000034266	Batf	bZIP
ENSMUSG00000026630	Batf3	bZIP
ENSMUSG00000034957	Cebpa	bZIP
ENSMUSG00000056501	Cebpb	bZIP
ENSMUSG00000052435	Cebpe	bZIP
ENSMUSG00000056216	Cebpg	bZIP
ENSMUSG00000025958	Creb1	bZIP
ENSMUSG00000028466	Creb3	bZIP
ENSMUSG00000038648	Creb3l2	bZIP
ENSMUSG00000053007	Creb5	bZIP
ENSMUSG00000051451	Crebzf	bZIP
ENSMUSG00000063889	Crem	bZIP
ENSMUSG00000059824	Dbp	bZIP
ENSMUSG00000025408	Ddit3	bZIP
ENSMUSG00000021250	Fos	bZIP
ENSMUSG00000003545	Fosb	bZIP
ENSMUSG00000024912	Fosl1	bZIP
ENSMUSG00000029135	Fosl2	bZIP
ENSMUSG00000003949	Hlf	bZIP
ENSMUSG00000034271	Jdp2	bZIP
ENSMUSG00000052684	Jun	bZIP
ENSMUSG00000052837	Junb	bZIP
ENSMUSG00000071076	Jund	bZIP
ENSMUSG00000055435	Maf	bZIP
ENSMUSG00000047591	Mafa	bZIP
ENSMUSG00000074622	Mafb	bZIP
ENSMUSG00000042622	Maff	bZIP
ENSMUSG00000051510	Mafg	bZIP
ENSMUSG00000018143	Mafk	bZIP
ENSMUSG00000058794	Nfe2	bZIP
ENSMUSG00000038615	Nfe2l1	bZIP
ENSMUSG00000015839	Nfe2l2	bZIP
ENSMUSG00000029832	Nfe2l3	bZIP
ENSMUSG00000056749	Nfil3	bZIP
ENSMUSG00000022389	Tef	bZIP
ENSMUSG00000020484	Xbp1	bZIP
ENSMUSG00000022508	Bcl6	ZF
ENSMUSG00000000317	Bcl6b	ZF
ENSMUSG00000025105	Bnc1	ZF
ENSMUSG00000005698	Ctcf	ZF
ENSMUSG00000070495	Ctcfl	ZF
ENSMUSG00000044224	Dnajc21	ZF
ENSMUSG00000024137	E4f1	ZF
ENSMUSG00000038418	Egr1	ZF
ENSMUSG00000037868	Egr2	ZF
ENSMUSG00000033730	Egr3	ZF
ENSMUSG00000029275	Gfi1	ZF
ENSMUSG00000026815	Gfi1b	ZF
ENSMUSG00000025407	Gli1	ZF
ENSMUSG00000048402	Gli2	ZF
ENSMUSG00000021318	Gli3	ZF
ENSMUSG00000014303	Glis2	ZF
ENSMUSG00000016503	Gtf3a	ZF
ENSMUSG00000043099	Hic1	ZF
ENSMUSG00000032119	Hinfp	ZF
ENSMUSG00000018654	Ikzf1	ZF
ENSMUSG00000040167	Ikzf5	ZF
ENSMUSG00000068154	Insm1	ZF
ENSMUSG00000054191	Klf1	ZF
ENSMUSG00000072294	Klf12	ZF
ENSMUSG00000030087	Klf15	ZF
ENSMUSG00000035397	Klf16	ZF
ENSMUSG00000029178	Klf3	ZF
ENSMUSG00000003032	Klf4	ZF
ENSMUSG00000005148	Klf5	ZF
ENSMUSG00000000078	Klf6	ZF
ENSMUSG00000025959	Klf7	ZF
ENSMUSG00000041649	Klf8	ZF
ENSMUSG00000033863	Klf9	ZF
ENSMUSG00000030678	Maz	ZF
ENSMUSG00000027684	Mecom	ZF
ENSMUSG00000028890	Mtf1	ZF
ENSMUSG00000030380	Mzf1	ZF
ENSMUSG00000048387	Osr1	ZF
ENSMUSG00000022330	Osr2	ZF
ENSMUSG00000024922	Ovol1	ZF
ENSMUSG00000037279	Ovol2	ZF
ENSMUSG00000002265	Peg3	ZF
ENSMUSG00000019817	Plagl1	ZF
ENSMUSG00000051413	Plagl2	ZF
ENSMUSG00000038151	Prdm1	ZF
ENSMUSG00000042414	Prdm14	ZF
ENSMUSG00000039410	Prdm16	ZF
ENSMUSG00000029913	Prdm5	ZF
ENSMUSG00000051977	Prdm9	ZF
ENSMUSG00000029249	Rest	ZF
ENSMUSG00000031665	Sall1	ZF
ENSMUSG00000027547	Sall4	ZF
ENSMUSG00000042821	Snai1	ZF
ENSMUSG00000022676	Snai2	ZF
ENSMUSG00000001280	Sp1	ZF
ENSMUSG00000018678	Sp2	ZF
ENSMUSG00000027109	Sp3	ZF
ENSMUSG00000025323	Sp4	ZF
ENSMUSG00000075304	Sp5	ZF
ENSMUSG00000060284	Sp7	ZF
ENSMUSG00000016458	Wt1	ZF
ENSMUSG00000021264	Yy1	ZF
ENSMUSG00000033454	Zbtb1	ZF
ENSMUSG00000049823	Zbtb12	ZF
ENSMUSG00000049672	Zbtb14	ZF
ENSMUSG00000006215	Zbtb17	ZF
ENSMUSG00000071661	Zbtb3	ZF
ENSMUSG00000048047	Zbtb33	ZF
ENSMUSG00000035011	Zbtb7a	ZF
ENSMUSG00000028042	Zbtb7b	ZF
ENSMUSG00000055835	Zfp1	ZF
ENSMUSG00000057895	Zfp105	ZF
ENSMUSG00000060397	Zfp128	ZF
ENSMUSG00000061079	Zfp143	ZF
ENSMUSG00000054737	Zfp182	ZF
ENSMUSG00000025602	Zfp202	ZF
ENSMUSG00000022529	Zfp263	ZF
ENSMUSG00000041483	Zfp281	ZF
ENSMUSG00000043602	Zfp3	ZF
ENSMUSG00000031079	Zfp300	ZF
ENSMUSG00000046351	Zfp322a	ZF
ENSMUSG00000039834	Zfp335	ZF
ENSMUSG00000042472	Zfp410	ZF
ENSMUSG00000051176	Zfp42	ZF
ENSMUSG00000068551	Zfp467	ZF
ENSMUSG00000036036	Zfp57	ZF
ENSMUSG00000059689	Zfp637	ZF
ENSMUSG00000075595	Zfp652	ZF
ENSMUSG00000079215	Zfp664	ZF
ENSMUSG00000045268	Zfp691	ZF
ENSMUSG00000050064	Zfp697	ZF
ENSMUSG00000025529	Zfp711	ZF
ENSMUSG00000046897	Zfp740	ZF
ENSMUSG00000066613	Zfp932	ZF
ENSMUSG00000079509	Zfx	ZF
ENSMUSG00000032368	Zic1	ZF
ENSMUSG00000061524	Zic2	ZF
ENSMUSG00000067860	Zic3	ZF
ENSMUSG00000041703	Zic5	ZF
ENSMUSG00000029729	Zkscan1	ZF
ENSMUSG00000055991	Zkscan5	ZF
ENSMUSG00000023902	Zscan10	ZF
ENSMUSG00000022228	Zscan26	ZF
ENSMUSG00000054272	Zscan4c	ZF
ENSMUSG00000024238	Zeb1	HD
ENSMUSG00000061894	Zscan20	ZF
ENSMUSG00000023994	Nfya	Others
ENSMUSG00000039191	Rbpj	Others
ENSMUSG00000017007	Rbpjl	Others
ENSMUSG00000029705	Cux1	HD
ENSMUSG00000042589	Cux2	HD
ENSMUSG00000043013	Onecut1	HD
ENSMUSG00000024837	Dmrt1	Others
ENSMUSG00000028610	Dmrtb1	Others
ENSMUSG00000011349	Dmrtc2	Others
ENSMUSG00000027490	E2f1	Others
ENSMUSG00000018983	E2f2	Others
ENSMUSG00000016477	E2f3	Others
ENSMUSG00000014859	E2f4	Others
ENSMUSG00000027552	E2f5	Others
ENSMUSG00000057469	E2f6	Others
ENSMUSG00000020185	E2f7	Others
ENSMUSG00000057098	Ebf1	Others
ENSMUSG00000022053	Ebf2	Others
ENSMUSG00000053552	Ebf4	Others
ENSMUSG00000012350	Ehf	Others
ENSMUSG00000036461	Elf1	Others
ENSMUSG00000037174	Elf2	Others
ENSMUSG00000003051	Elf3	Others
ENSMUSG00000031103	Elf4	Others
ENSMUSG00000027186	Elf5	Others
ENSMUSG00000009406	Elk1	Others
ENSMUSG00000008398	Elk3	Others
ENSMUSG00000026436	Elk4	Others
ENSMUSG00000040732	Erg	Others
ENSMUSG00000032035	Ets1	Others
ENSMUSG00000022895	Ets2	Others
ENSMUSG00000004151	Etv1	Others
ENSMUSG00000006311	Etv2	Others
ENSMUSG00000003382	Etv3	Others
ENSMUSG00000017724	Etv4	Others
ENSMUSG00000013089	Etv5	Others
ENSMUSG00000030199	Etv6	Others
ENSMUSG00000055197	Fev	Others
ENSMUSG00000016087	Fli1	Others
ENSMUSG00000008976	Gabpa	Others
ENSMUSG00000024215	Spdef	Others
ENSMUSG00000002111	Spi1	Others
ENSMUSG00000008193	Spib	Others
ENSMUSG00000004359	Spic	Others
ENSMUSG00000035451	Foxa1	Others
ENSMUSG00000037025	Foxa2	Others
ENSMUSG00000040891	Foxa3	Others
ENSMUSG00000059246	Foxb1	Others
ENSMUSG00000050295	Foxc1	Others
ENSMUSG00000046714	Foxc2	Others
ENSMUSG00000078302	Foxd1	Others
ENSMUSG00000067261	Foxd3	Others
ENSMUSG00000020950	Foxg1	Others
ENSMUSG00000047861	Foxi1	Others
ENSMUSG00000034227	Foxj1	Others
ENSMUSG00000003154	Foxj2	Others
ENSMUSG00000032998	Foxj3	Others
ENSMUSG00000056493	Foxk1	Others
ENSMUSG00000097084	Foxl1	Others
ENSMUSG00000050397	Foxl2	Others
ENSMUSG00000001517	Foxm1	Others
ENSMUSG00000002057	Foxn1	Others
ENSMUSG00000042002	Foxn4	Others
ENSMUSG00000044167	Foxo1	Others
ENSMUSG00000048756	Foxo3	Others
ENSMUSG00000042903	Foxo4	Others
ENSMUSG00000052135	Foxo6	Others
ENSMUSG00000030067	Foxp1	Others
ENSMUSG00000029563	Foxp2	Others
ENSMUSG00000038415	Foxq1	Others
ENSMUSG00000094504	Foxl3	Others
ENSMUSG00000031162	Gata1	Others
ENSMUSG00000015053	Gata2	Others
ENSMUSG00000015619	Gata3	Others
ENSMUSG00000021944	Gata4	Others
ENSMUSG00000015627	Gata5	Others
ENSMUSG00000005836	Gata6	Others
ENSMUSG00000023333	Gcm1	Others
ENSMUSG00000022286	Grhl2	Others
ENSMUSG00000026380	Tfcp2l1	Others
ENSMUSG00000036602	Alx1	HD
ENSMUSG00000014603	Alx3	HD
ENSMUSG00000040310	Alx4	HD
ENSMUSG00000035277	Arx	HD
ENSMUSG00000026805	Barhl1	HD
ENSMUSG00000034384	Barhl2	HD
ENSMUSG00000021381	Barx1	HD
ENSMUSG00000032033	Barx2	HD
ENSMUSG00000054360	Bsx	HD
ENSMUSG00000024619	Cdx1	HD
ENSMUSG00000029646	Cdx2	HD
ENSMUSG00000031326	Cdx4	HD
ENSMUSG00000095975	Cphx1	HD
ENSMUSG00000041578	Crx	HD
ENSMUSG00000030507	Dbx1	HD
ENSMUSG00000045608	Dbx2	HD
ENSMUSG00000041911	Dlx1	HD
ENSMUSG00000023391	Dlx2	HD
ENSMUSG00000001510	Dlx3	HD
ENSMUSG00000020871	Dlx4	HD
ENSMUSG00000029755	Dlx5	HD
ENSMUSG00000028707	Dmbx1	HD
ENSMUSG00000048502	Duxbl1	HD
ENSMUSG00000043969	Emx2	HD
ENSMUSG00000058665	En1	HD
ENSMUSG00000039095	En2	HD
ENSMUSG00000023443	Esx1	HD
ENSMUSG00000005503	Evx1	HD
ENSMUSG00000001815	Evx2	HD
ENSMUSG00000067724	Gbx1	HD
ENSMUSG00000034486	Gbx2	HD
ENSMUSG00000021095	Gsc	HD
ENSMUSG00000035946	Gsx2	HD
ENSMUSG00000034551	Hdx	HD
ENSMUSG00000039377	Hlx	HD
ENSMUSG00000021972	Hmbox1	HD
ENSMUSG00000067438	Hmx1	HD
ENSMUSG00000050100	Hmx2	HD
ENSMUSG00000029556	Hnf1a	HD
ENSMUSG00000020679	Hnf1b	HD
ENSMUSG00000057156	Homez	HD
ENSMUSG00000029844	Hoxa1	HD
ENSMUSG00000000938	Hoxa10	HD
ENSMUSG00000038210	Hoxa11	HD
ENSMUSG00000038203	Hoxa13	HD
ENSMUSG00000014704	Hoxa2	HD
ENSMUSG00000079560	Hoxa3	HD
ENSMUSG00000000942	Hoxa4	HD
ENSMUSG00000038253	Hoxa5	HD
ENSMUSG00000043219	Hoxa6	HD
ENSMUSG00000038236	Hoxa7	HD
ENSMUSG00000038227	Hoxa9	HD
ENSMUSG00000049604	Hoxb13	HD
ENSMUSG00000048763	Hoxb3	HD
ENSMUSG00000038692	Hoxb4	HD
ENSMUSG00000038700	Hoxb5	HD
ENSMUSG00000000690	Hoxb6	HD
ENSMUSG00000038721	Hoxb7	HD
ENSMUSG00000056648	Hoxb8	HD
ENSMUSG00000020875	Hoxb9	HD
ENSMUSG00000022484	Hoxc10	HD
ENSMUSG00000001656	Hoxc11	HD
ENSMUSG00000050328	Hoxc12	HD
ENSMUSG00000001655	Hoxc13	HD
ENSMUSG00000075394	Hoxc4	HD
ENSMUSG00000022485	Hoxc5	HD
ENSMUSG00000001661	Hoxc6	HD
ENSMUSG00000001657	Hoxc8	HD
ENSMUSG00000036139	Hoxc9	HD
ENSMUSG00000042448	Hoxd1	HD
ENSMUSG00000050368	Hoxd10	HD
ENSMUSG00000042499	Hoxd11	HD
ENSMUSG00000001819	Hoxd13	HD
ENSMUSG00000079277	Hoxd3	HD
ENSMUSG00000027102	Hoxd8	HD
ENSMUSG00000043342	Hoxd9	HD
ENSMUSG00000001504	Irx2	HD
ENSMUSG00000031734	Irx3	HD
ENSMUSG00000021604	Irx4	HD
ENSMUSG00000031737	Irx5	HD
ENSMUSG00000031738	Irx6	HD
ENSMUSG00000042258	Isl1	HD
ENSMUSG00000032318	Isl2	HD
ENSMUSG00000031621	Isx	HD
ENSMUSG00000034968	Lbx2	HD
ENSMUSG00000018698	Lhx1	HD
ENSMUSG00000000247	Lhx2	HD
ENSMUSG00000026934	Lhx3	HD
ENSMUSG00000026468	Lhx4	HD
ENSMUSG00000029595	Lhx5	HD
ENSMUSG00000026890	Lhx6	HD
ENSMUSG00000096225	Lhx8	HD
ENSMUSG00000019230	Lhx9	HD
ENSMUSG00000026686	Lmx1a	HD
ENSMUSG00000038765	Lmx1b	HD
ENSMUSG00000020160	Meis1	HD
ENSMUSG00000027210	Meis2	HD
ENSMUSG00000041420	Meis3	HD
ENSMUSG00000001493	Meox1	HD
ENSMUSG00000036144	Meox2	HD
ENSMUSG00000026497	Mixl1	HD
ENSMUSG00000001566	Mnx1	HD
ENSMUSG00000048450	Msx1	HD
ENSMUSG00000021469	Msx2	HD
ENSMUSG00000025469	Msx3	HD
ENSMUSG00000012396	Nanog	HD
ENSMUSG00000029112	Nkx1-1	HD
ENSMUSG00000048528	Nkx1-2	HD
ENSMUSG00000001496	Nkx2-1	HD
ENSMUSG00000027434	Nkx2-2	HD
ENSMUSG00000044220	Nkx2-3	HD
ENSMUSG00000054160	Nkx2-4	HD
ENSMUSG00000015579	Nkx2-5	HD
ENSMUSG00000044186	Nkx2-6	HD
ENSMUSG00000058669	Nkx2-9	HD
ENSMUSG00000022061	Nkx3-1	HD
ENSMUSG00000049691	Nkx3-2	HD
ENSMUSG00000035187	Nkx6-1	HD
ENSMUSG00000063672	Nkx6-3	HD
ENSMUSG00000029736	Nobox	HD
ENSMUSG00000068302	Noto	HD
ENSMUSG00000054310	Obox1	HD
ENSMUSG00000066772	Obox3	HD
ENSMUSG00000074366	Obox5	HD
ENSMUSG00000041583	Obox6	HD
ENSMUSG00000021685	Otp	HD
ENSMUSG00000005917	Otx1	HD
ENSMUSG00000021848	Otx2	HD
ENSMUSG00000052534	Pbx1	HD
ENSMUSG00000034673	Pbx2	HD
ENSMUSG00000038718	Pbx3	HD
ENSMUSG00000029644	Pdx1	HD
ENSMUSG00000007946	Phox2a	HD
ENSMUSG00000012520	Phox2b	HD
ENSMUSG00000021506	Pitx1	HD
ENSMUSG00000028023	Pitx2	HD
ENSMUSG00000025229	Pitx3	HD
ENSMUSG00000006705	Pknox1	HD
ENSMUSG00000035934	Pknox2	HD
ENSMUSG00000044542	Prop1	HD
ENSMUSG00000026586	Prrx1	HD
ENSMUSG00000039476	Prrx2	HD
ENSMUSG00000074369	Obox2	HD
ENSMUSG00000024518	Rax	HD
ENSMUSG00000051038	Rhox11	HD
ENSMUSG00000006200	Rhox6	HD
ENSMUSG00000001103	Sebox	HD
ENSMUSG00000027833	Shox2	HD
ENSMUSG00000051367	Six1	HD
ENSMUSG00000024134	Six2	HD
ENSMUSG00000038805	Six3	HD
ENSMUSG00000034460	Six4	HD
ENSMUSG00000021099	Six6	HD
ENSMUSG00000047407	Tgif1	HD
ENSMUSG00000062175	Tgif2	HD
ENSMUSG00000068327	Tlx2	HD
ENSMUSG00000029546	Uncx	HD
ENSMUSG00000006270	Vax1	HD
ENSMUSG00000034777	Vax2	HD
ENSMUSG00000033080	Vsx1	HD
ENSMUSG00000021239	Vsx2	HD
ENSMUSG00000004231	Pax2	HD
ENSMUSG00000029706	Pax4	HD
ENSMUSG00000027168	Pax6	HD
ENSMUSG00000028736	Pax7	HD
ENSMUSG00000004842	Pou1f1	HD
ENSMUSG00000026565	Pou2f1	HD
ENSMUSG00000008496	Pou2f2	HD
ENSMUSG00000032015	Pou2f3	HD
ENSMUSG00000090125	Pou3f1	HD
ENSMUSG00000095139	Pou3f2	HD
ENSMUSG00000056854	Pou3f4	HD
ENSMUSG00000024497	Pou4f3	HD
ENSMUSG00000024406	Pou5f1	HD
ENSMUSG00000009739	Pou6f1	HD
ENSMUSG00000022556	Hsf1	Others
ENSMUSG00000019878	Hsf2	Others
ENSMUSG00000018899	Irf1	Others
ENSMUSG00000031627	Irf2	Others
ENSMUSG00000003184	Irf3	Others
ENSMUSG00000021356	Irf4	Others
ENSMUSG00000029771	Irf5	Others
ENSMUSG00000026638	Irf6	Others
ENSMUSG00000025498	Irf7	Others
ENSMUSG00000041515	Irf8	Others
ENSMUSG00000002325	Irf9	Others
ENSMUSG00000030557	Mef2a	Others
ENSMUSG00000079033	Mef2b	Others
ENSMUSG00000005583	Mef2c	Others
ENSMUSG00000001419	Mef2d	Others
ENSMUSG00000015605	Srf	Others
ENSMUSG00000024513	Mbd2	Others
ENSMUSG00000031393	Mecp2	Others
ENSMUSG00000019982	Myb	Others
ENSMUSG00000025912	Mybl1	Others
ENSMUSG00000017861	Mybl2	Others
ENSMUSG00000048481	Mypop	Others
ENSMUSG00000075028	Prdm11	Others
ENSMUSG00000031921	Terf2	Others
ENSMUSG00000036098	Myrf	Others
ENSMUSG00000046532	Ar	NHR
ENSMUSG00000019768	Esr1	NHR
ENSMUSG00000021055	Esr2	NHR
ENSMUSG00000024955	Esrra	NHR
ENSMUSG00000021255	Esrrb	NHR
ENSMUSG00000026610	Esrrg	NHR
ENSMUSG00000017950	Hnf4a	NHR
ENSMUSG00000017688	Hnf4g	NHR
ENSMUSG00000020889	Nr1d1	NHR
ENSMUSG00000021775	Nr1d2	NHR
ENSMUSG00000060601	Nr1h2	NHR
ENSMUSG00000002108	Nr1h3	NHR
ENSMUSG00000047638	Nr1h4	NHR
ENSMUSG00000022809	Nr1i2	NHR
ENSMUSG00000005677	Nr1i3	NHR
ENSMUSG00000005897	Nr2c1	NHR
ENSMUSG00000005893	Nr2c2	NHR
ENSMUSG00000019803	Nr2e1	NHR
ENSMUSG00000032292	Nr2e3	NHR
ENSMUSG00000069171	Nr2f1	NHR
ENSMUSG00000030551	Nr2f2	NHR
ENSMUSG00000002393	Nr2f6	NHR
ENSMUSG00000024431	Nr3c1	NHR
ENSMUSG00000023034	Nr4a1	NHR
ENSMUSG00000026826	Nr4a2	NHR
ENSMUSG00000026751	Nr5a1	NHR
ENSMUSG00000026398	Nr5a2	NHR
ENSMUSG00000031870	Pgr	NHR
ENSMUSG00000022383	Ppara	NHR
ENSMUSG00000000440	Pparg	NHR
ENSMUSG00000037992	Rara	NHR
ENSMUSG00000017491	Rarb	NHR
ENSMUSG00000001288	Rarg	NHR
ENSMUSG00000032238	Rora	NHR
ENSMUSG00000036192	Rorb	NHR
ENSMUSG00000028150	Rorc	NHR
ENSMUSG00000015846	Rxra	NHR
ENSMUSG00000039656	Rxrb	NHR
ENSMUSG00000015843	Rxrg	NHR
ENSMUSG00000058756	Thra	NHR
ENSMUSG00000022479	Vdr	NHR
ENSMUSG00000059552	Trp53	Others
ENSMUSG00000022510	Trp63	Others
ENSMUSG00000029026	Trp73	Others
ENSMUSG00000014030	Pax5	Others
ENSMUSG00000045515	Pou3f3	Others
ENSMUSG00000033016	Nfatc1	Others
ENSMUSG00000027544	Nfatc2	Others
ENSMUSG00000031902	Nfatc3	Others
ENSMUSG00000023411	Nfatc4	Others
ENSMUSG00000028163	Nfkb1	Others
ENSMUSG00000025225	Nfkb2	Others
ENSMUSG00000020275	Rel	Others
ENSMUSG00000024927	Rela	Others
ENSMUSG00000002983	Relb	Others
ENSMUSG00000031706	Rfx1	Others
ENSMUSG00000024206	Rfx2	Others
ENSMUSG00000040929	Rfx3	Others
ENSMUSG00000020037	Rfx4	Others
ENSMUSG00000019900	Rfx6	Others
ENSMUSG00000037674	Rfx7	Others
ENSMUSG00000022952	Runx1	Others
ENSMUSG00000039153	Runx2	Others
ENSMUSG00000070691	Runx3	Others
ENSMUSG00000000731	Aire	Others
ENSMUSG00000028901	Gmeb1	Others
ENSMUSG00000038705	Gmeb2	Others
ENSMUSG00000026222	Sp100	Others
ENSMUSG00000070034	Sp110	Others
ENSMUSG00000028565	Nfia	Others
ENSMUSG00000008575	Nfib	Others
ENSMUSG00000055053	Nfic	Others
ENSMUSG00000032402	Smad3	Others
ENSMUSG00000024515	Smad4	Others
ENSMUSG00000021540	Smad5	Others
ENSMUSG00000027796	Smad9	Others
ENSMUSG00000022641	Bbx	Others
ENSMUSG00000005442	Cic	Others
ENSMUSG00000002996	Hbp1	Others
ENSMUSG00000020232	Hmg20b	Others
ENSMUSG00000027985	Lef1	Others
ENSMUSG00000096014	Sox1	Others
ENSMUSG00000033006	Sox10	Others
ENSMUSG00000063632	Sox11	Others
ENSMUSG00000051817	Sox12	Others
ENSMUSG00000070643	Sox13	Others
ENSMUSG00000053747	Sox14	Others
ENSMUSG00000041287	Sox15	Others
ENSMUSG00000025902	Sox17	Others
ENSMUSG00000046470	Sox18	Others
ENSMUSG00000074637	Sox2	Others
ENSMUSG00000061517	Sox21	Others
ENSMUSG00000045179	Sox3	Others
ENSMUSG00000040489	Sox30	Others
ENSMUSG00000076431	Sox4	Others
ENSMUSG00000041540	Sox5	Others
ENSMUSG00000051910	Sox6	Others
ENSMUSG00000063060	Sox7	Others
ENSMUSG00000024176	Sox8	Others
ENSMUSG00000000567	Sox9	Others
ENSMUSG00000069036	Sry	Others
ENSMUSG00000000782	Tcf7	Others
ENSMUSG00000055799	Tcf7l1	Others
ENSMUSG00000024985	Tcf7l2	Others
ENSMUSG00000026104	Stat1	Others
ENSMUSG00000040033	Stat2	Others
ENSMUSG00000004040	Stat3	Others
ENSMUSG00000062939	Stat4	Others
ENSMUSG00000004043	Stat5a	Others
ENSMUSG00000020919	Stat5b	Others
ENSMUSG00000002147	Stat6	Others
ENSMUSG00000032446	Eomes	Others
ENSMUSG00000062327	T	Others
ENSMUSG00000035033	Tbr1	Others
ENSMUSG00000009097	Tbx1	Others
ENSMUSG00000000093	Tbx2	Others
ENSMUSG00000031965	Tbx20	Others
ENSMUSG00000001444	Tbx21	Others
ENSMUSG00000018604	Tbx3	Others
ENSMUSG00000000094	Tbx4	Others
ENSMUSG00000018263	Tbx5	Others
ENSMUSG00000014767	Tbp	Others
ENSMUSG00000055320	Tead1	Others
ENSMUSG00000030796	Tead2	Others
ENSMUSG00000030353	Tead4	Others
ENSMUSG00000036442	Thap11	Others
ENSMUSG00000031885	Cbfb	Others
ENSMUSG00000024140	Epas1	Others
ENSMUSG00000053111	Fank1	Others
ENSMUSG00000020248	Nfyb	Others
ENSMUSG00000032897	Nfyc	Others
ENSMUSG00000058440	Nrf1	Others
ENSMUSG00000046957	Spz1	Others
ENSMUSG00000031314	Taf1	Others
ENSMUSG00000042596	Tfap2d	Others
ENSMUSG00000066224	Arid3c	Others
ENSMUSG00000033237	Arid2	Others
ENSMUSG00000046711	Hmga1	Others
ENSMUSG00000078249	Hmga1b	Others
ENSMUSG00000094410	Gm38394	ZF
ENSMUSG00000036816	Atoh7	bHLH
ENSMUSG00000045493	Bhlhe23	bHLH
ENSMUSG00000046518	Ferd3l	bHLH
ENSMUSG00000038193	Hand2	bHLH
ENSMUSG00000067071	Hes6	bHLH
ENSMUSG00000040289	Hey1	bHLH
ENSMUSG00000032744	Heyl	bHLH
ENSMUSG00000030544	Mesp1	bHLH
ENSMUSG00000030543	Mesp2	bHLH
ENSMUSG00000005373	Mlxipl	bHLH
ENSMUSG00000001156	Mxd1	bHLH
ENSMUSG00000048015	Neurod4	bHLH
ENSMUSG00000037984	Neurod6	bHLH
ENSMUSG00000044312	Neurog3	bHLH
ENSMUSG00000046160	Olig1	bHLH
ENSMUSG00000028417	Tal2	bHLH
ENSMUSG00000033943	Mga	bHLH
ENSMUSG00000038539	Atf5	bZIP
ENSMUSG00000026663	Atf6	bZIP
ENSMUSG00000015461	Atf6b	bZIP
ENSMUSG00000027230	Creb3l1	bZIP
ENSMUSG00000032652	Crebl2	bZIP
ENSMUSG00000052414	Gm28047	bZIP
ENSMUSG00000000861	Bcl11a	ZF
ENSMUSG00000048251	Bcl11b	ZF
ENSMUSG00000028487	Bnc2	ZF
ENSMUSG00000021221	Dpf3	ZF
ENSMUSG00000071341	Egr4	ZF
ENSMUSG00000029697	Fezf1	ZF
ENSMUSG00000021743	Fezf2	ZF
ENSMUSG00000034762	Glis1	ZF
ENSMUSG00000052942	Glis3	ZF
ENSMUSG00000050240	Hic2	ZF
ENSMUSG00000021366	Hivep1	ZF
ENSMUSG00000015501	Hivep2	ZF
ENSMUSG00000028634	Hivep3	ZF
ENSMUSG00000025997	Ikzf2	ZF
ENSMUSG00000018168	Ikzf3	ZF
ENSMUSG00000002578	Ikzf4	ZF
ENSMUSG00000037465	Klf10	ZF
ENSMUSG00000020653	Klf11	ZF
ENSMUSG00000052040	Klf13	ZF
ENSMUSG00000073209	Klf14	ZF
ENSMUSG00000055148	Klf2	ZF
ENSMUSG00000046873	Mbtps2	ZF
ENSMUSG00000037730	Mynn	ZF
ENSMUSG00000020453	Patz1	ZF
ENSMUSG00000003282	Plag1	ZF
ENSMUSG00000079466	Prdm12	ZF
ENSMUSG00000014039	Prdm15	ZF
ENSMUSG00000035529	Prdm4	ZF
ENSMUSG00000069378	Prdm6	ZF
ENSMUSG00000061898	Rbak	ZF
ENSMUSG00000039087	Rreb1	ZF
ENSMUSG00000048385	Scrt1	ZF
ENSMUSG00000060257	Scrt2	ZF
ENSMUSG00000006587	Snai3	ZF
ENSMUSG00000038560	Sp6	ZF
ENSMUSG00000048562	Sp8	ZF
ENSMUSG00000068859	Sp9	ZF
ENSMUSG00000018377	Vezf1	ZF
ENSMUSG00000091736	Yy2	ZF
ENSMUSG00000022601	Zbtb11	ZF
ENSMUSG00000066687	Zbtb16	ZF
ENSMUSG00000063659	Zbtb18	ZF
ENSMUSG00000075327	Zbtb2	ZF
ENSMUSG00000022708	Zbtb20	ZF
ENSMUSG00000051390	Zbtb22	ZF
ENSMUSG00000050714	Zbtb26	ZF
ENSMUSG00000006310	Zbtb32	ZF
ENSMUSG00000043467	Zbtb37	ZF
ENSMUSG00000026788	Zbtb43	ZF
ENSMUSG00000049600	Zbtb45	ZF
ENSMUSG00000028952	Zbtb48	ZF
ENSMUSG00000029127	Zbtb49	ZF
ENSMUSG00000066798	Zbtb6	ZF
ENSMUSG00000044646	Zbtb7c	ZF
ENSMUSG00000058638	Zfp110	ZF
ENSMUSG00000037007	Zfp113	ZF
ENSMUSG00000029587	Zfp12	ZF
ENSMUSG00000062012	Zfp13	ZF
ENSMUSG00000053985	Zfp14	ZF
ENSMUSG00000037029	Zfp146	ZF
ENSMUSG00000022811	Zfp148	ZF
ENSMUSG00000054939	Zfp174	ZF
ENSMUSG00000006720	Zfp184	ZF
ENSMUSG00000039634	Zfp189	ZF
ENSMUSG00000052763	Zfp212	ZF
ENSMUSG00000071256	Zfp213	ZF
ENSMUSG00000049295	Zfp219	ZF
ENSMUSG00000041258	Zfp236	ZF
ENSMUSG00000051469	Zfp24	ZF
ENSMUSG00000030145	Zfp248	ZF
ENSMUSG00000049421	Zfp260	ZF
ENSMUSG00000001065	Zfp276	ZF
ENSMUSG00000025821	Zfp282	ZF
ENSMUSG00000005267	Zfp287	ZF
ENSMUSG00000011267	Zfp296	ZF
ENSMUSG00000046658	Zfp316	ZF
ENSMUSG00000057551	Zfp317	ZF
ENSMUSG00000004500	Zfp324	ZF
ENSMUSG00000059842	Zfp341	ZF
ENSMUSG00000020364	Zfp354a	ZF
ENSMUSG00000020335	Zfp354b	ZF
ENSMUSG00000074220	Zfp382	ZF
ENSMUSG00000099689	Zfp383	ZF
ENSMUSG00000038346	Zfp384	ZF
ENSMUSG00000062519	Zfp398	ZF
ENSMUSG00000047003	Zfp41	ZF
ENSMUSG00000059878	Zfp422	ZF
ENSMUSG00000045333	Zfp423	ZF
ENSMUSG00000073176	Zfp449	ZF
ENSMUSG00000048728	Zfp454	ZF
ENSMUSG00000051351	Zfp46	ZF
ENSMUSG00000043059	Zfp513	ZF
ENSMUSG00000024420	Zfp521	ZF
ENSMUSG00000024220	Zfp523	ZF
ENSMUSG00000051184	Zfp524	ZF
ENSMUSG00000078796	Zfp541	ZF
ENSMUSG00000074500	Zfp558	ZF
ENSMUSG00000078768	Zfp566	ZF
ENSMUSG00000055633	Zfp580	ZF
ENSMUSG00000074406	Zfp628	ZF
ENSMUSG00000027551	Zfp64	ZF
ENSMUSG00000022987	Zfp641	ZF
ENSMUSG00000054967	Zfp647	ZF
ENSMUSG00000038895	Zfp653	ZF
ENSMUSG00000034800	Zfp661	ZF
ENSMUSG00000064141	Zfp69	ZF
ENSMUSG00000037243	Zfp692	ZF
ENSMUSG00000047371	Zfp768	ZF
ENSMUSG00000040321	Zfp770	ZF
ENSMUSG00000054716	Zfp771	ZF
ENSMUSG00000071477	Zfp777	ZF
ENSMUSG00000043290	Zfp784	ZF
ENSMUSG00000046792	Zfp787	ZF
ENSMUSG00000044296	Zfp879	ZF
ENSMUSG00000031907	Zfp90	ZF
ENSMUSG00000036972	Zic4	ZF
ENSMUSG00000030393	Zik1	ZF
ENSMUSG00000020472	Zkscan17	ZF
ENSMUSG00000018347	Zkscan6	ZF
ENSMUSG00000095339	Zscan4b	ZF
ENSMUSG00000090714	Zscan4d	ZF
ENSMUSG00000070828	Zscan4f	ZF
ENSMUSG00000026872	Zeb2	HD
ENSMUSG00000038872	Zfhx3	HD
ENSMUSG00000025255	Zfhx4	HD
ENSMUSG00000030757	Zkscan2	ZF
ENSMUSG00000050619	Zscan29	ZF
ENSMUSG00000068267	Cenpb	Others
ENSMUSG00000079083	Jrkl	Others
ENSMUSG00000049232	Tigd2	Others
ENSMUSG00000050966	Lin28a	Others
ENSMUSG00000063804	Lin28b	Others
ENSMUSG00000028639	Ybx1	Others
ENSMUSG00000018554	Ybx2	Others
ENSMUSG00000030189	Ybx3	Others
ENSMUSG00000045991	Onecut2	HD
ENSMUSG00000045518	Onecut3	HD
ENSMUSG00000023927	Satb1	HD
ENSMUSG00000038331	Satb2	HD
ENSMUSG00000024560	Cxxc1	Others
ENSMUSG00000044365	Cxxc4	Others
ENSMUSG00000046668	Cxxc5	Others
ENSMUSG00000004099	Dnmt1	Others
ENSMUSG00000030811	Fbxl19	Others
ENSMUSG00000054611	Kdm2a	Others
ENSMUSG00000029475	Kdm2b	Others
ENSMUSG00000002028	Kmt2a	Others
ENSMUSG00000047146	Tet1	Others
ENSMUSG00000034832	Tet3	Others
ENSMUSG00000048138	Dmrt2	Others
ENSMUSG00000042372	Dmrt3	Others
ENSMUSG00000043753	Dmrta1	Others
ENSMUSG00000047143	Dmrta2	Others
ENSMUSG00000046179	E2f8	Others
ENSMUSG00000038482	Tfdp1	Others
ENSMUSG00000032411	Tfdp2	Others
ENSMUSG00000010476	Ebf3	Others
ENSMUSG00000040857	Erf	Others
ENSMUSG00000056829	Foxb2	Others
ENSMUSG00000055210	Foxd2	Others
ENSMUSG00000051490	Foxd4	Others
ENSMUSG00000070990	Foxe1	Others
ENSMUSG00000044518	Foxe3	Others
ENSMUSG00000042812	Foxf1	Others
ENSMUSG00000038402	Foxf2	Others
ENSMUSG00000033837	Foxh1	Others
ENSMUSG00000048377	Foxi2	Others
ENSMUSG00000055874	Foxi3	Others
ENSMUSG00000039275	Foxk2	Others
ENSMUSG00000034998	Foxn2	Others
ENSMUSG00000033713	Foxn3	Others
ENSMUSG00000039521	Foxp3	Others
ENSMUSG00000023991	Foxp4	Others
ENSMUSG00000074676	Foxs1	Others
ENSMUSG00000038679	Trps1	Others
ENSMUSG00000021362	Gcm2	Others
ENSMUSG00000020656	Grhl1	Others
ENSMUSG00000009733	Tfcp2	Others
ENSMUSG00000009741	Ubp1	Others
ENSMUSG00000060261	Gtf2i	Others
ENSMUSG00000023079	Gtf2ird1	Others
ENSMUSG00000029754	Dlx6	HD
ENSMUSG00000033726	Emx1	HD
ENSMUSG00000022738	Gsc2	HD
ENSMUSG00000053129	Gsx1	HD
ENSMUSG00000040726	Hesx1	HD
ENSMUSG00000024986	Hhex	HD
ENSMUSG00000040148	Hmx3	HD
ENSMUSG00000018973	Hoxb1	HD
ENSMUSG00000075588	Hoxb2	HD
ENSMUSG00000001823	Hoxd12	HD
ENSMUSG00000101174	Hoxd4	HD
ENSMUSG00000060969	Irx1	HD
ENSMUSG00000025216	Lbx1	HD
ENSMUSG00000041309	Nkx6-2	HD
ENSMUSG00000055942	Obox7	HD
ENSMUSG00000099216	Obox8	HD
ENSMUSG00000031860	Pbx4	HD
ENSMUSG00000041730	Prrxl1	HD
ENSMUSG00000064137	Rhox8	HD
ENSMUSG00000068048	Rhox9	HD
ENSMUSG00000040841	Six5	HD
ENSMUSG00000025215	Tlx1	HD
ENSMUSG00000040610	Tlx3	HD
ENSMUSG00000004872	Pax3	HD
ENSMUSG00000048349	Pou4f1	HD
ENSMUSG00000031688	Pou4f2	HD
ENSMUSG00000009734	Pou6f2	HD
ENSMUSG00000045802	Hsf3	Others
ENSMUSG00000033249	Hsf4	Others
ENSMUSG00000070345	Hsf5	Others
ENSMUSG00000045336	Hsfy2	Others
ENSMUSG00000039693	Msantd3	Others
ENSMUSG00000039164	Naif1	Others
ENSMUSG00000002345	Borcs8	Others
ENSMUSG00000015697	Setdb1	Others
ENSMUSG00000040429	Mterf1a	Others
ENSMUSG00000053178	Mterf1b	Others
ENSMUSG00000023932	Cdc5l	Others
ENSMUSG00000039068	Zzz3	Others
ENSMUSG00000048938	Nr1h5	NHR
ENSMUSG00000031618	Nr3c2	NHR
ENSMUSG00000028341	Nr4a3	NHR
ENSMUSG00000063972	Nr6a1	NHR
ENSMUSG00000002250	Ppard	NHR
ENSMUSG00000021779	Thrb	NHR
ENSMUSG00000037034	Pax1	Others
ENSMUSG00000026976	Pax8	Others
ENSMUSG00000001497	Pax9	Others
ENSMUSG00000025019	Lcor	Others
ENSMUSG00000015882	Lcorl	Others
ENSMUSG00000010175	Prox1	Others
ENSMUSG00000042320	Prox2	Others
ENSMUSG00000003847	Nfat5	Others
ENSMUSG00000005774	Rfx5	Others
ENSMUSG00000057173	Rfx8	Others
ENSMUSG00000079808		Others
ENSMUSG00000058886	Deaf1	Others
ENSMUSG00000070031	Sp140	Others
ENSMUSG00000001911	Nfix	Others
ENSMUSG00000031681	Smad1	Others
ENSMUSG00000032329	Hmg20a	Others
ENSMUSG00000037477	Tbx10	Others
ENSMUSG00000027868	Tbx15	Others
ENSMUSG00000032419	Tbx18	Others
ENSMUSG00000026572	Tbx19	Others
ENSMUSG00000031241	Tbx22	Others
ENSMUSG00000030699	Tbx6	Others
ENSMUSG00000061809	Tbpl2	Others
ENSMUSG00000037214	Thap1	Others
ENSMUSG00000030753	Thap12	Others
ENSMUSG00000042207	Kdm5b	Others
ENSMUSG00000056673	Kdm5d	Others
ENSMUSG00000020441	2310033P09Rik	Others
ENSMUSG00000020869	Lrrc59	Others
ENSMUSG00000053080	2700081O15Rik	ZF
ENSMUSG00000038351	Sgsm2	ZF
ENSMUSG00000034333	Zbed4	ZF
ENSMUSG00000055917	Zfp277	ZF
ENSMUSG00000062761	Zfp512	ZF
ENSMUSG00000021575	Ahrr	bHLH
ENSMUSG00000040187	Arntl2	bHLH
ENSMUSG00000035951	Ascl3	bHLH
ENSMUSG00000085111	Ascl4	bHLH
ENSMUSG00000097918	Ascl5	bHLH
ENSMUSG00000037621	Atoh8	bHLH
ENSMUSG00000044243	Bhlha9	bHLH
ENSMUSG00000047171	Helt	bHLH
ENSMUSG00000028946	Hes3	bHLH
ENSMUSG00000021485	Mxd3	bHLH
ENSMUSG00000037235	Mxd4	bHLH
ENSMUSG00000028654	Mycl	bHLH
ENSMUSG00000044597	Mycs	bHLH
ENSMUSG00000020647	Ncoa1	bHLH
ENSMUSG00000005886	Ncoa2	bHLH
ENSMUSG00000001988	Npas1	bHLH
ENSMUSG00000021010	Npas3	bHLH
ENSMUSG00000045903	Npas4	bHLH
ENSMUSG00000034161	Scx	bHLH
ENSMUSG00000019913	Sim1	bHLH
ENSMUSG00000062713	Sim2	bHLH
ENSMUSG00000059625	Sohlh1	bHLH
ENSMUSG00000068079	Tcf15	bHLH
ENSMUSG00000006642	Tcf23	bHLH
ENSMUSG00000099032	Tcf24	bHLH
ENSMUSG00000068284	Usf3	bHLH
ENSMUSG00000040596	Pogk	Others
ENSMUSG00000039699	Batf2	bZIP
ENSMUSG00000049550	Clip1	bZIP
ENSMUSG00000035041	Creb3l3	bZIP
ENSMUSG00000027938	Creb3l4	bZIP
ENSMUSG00000068263	Efcc1	bZIP
ENSMUSG00000033282	Rpgrip1l	bZIP
ENSMUSG00000071669	Snx29	bZIP
ENSMUSG00000024532	1700034E13Rik	ZF
ENSMUSG00000074829	2010315B03Rik	ZF
ENSMUSG00000078894	2210418O10Rik	ZF
ENSMUSG00000074832	Zfp998	ZF
ENSMUSG00000060301	2610008E11Rik	ZF
ENSMUSG00000091474	2610021A01Rik	ZF
ENSMUSG00000071302	2610044O15Rik8	ZF
ENSMUSG00000020491	2810021J22Rik	ZF
ENSMUSG00000072762	4930522L14Rik	ZF
ENSMUSG00000072763	5430403G16Rik	ZF
ENSMUSG00000073197	5730507C01Rik	ZF
ENSMUSG00000030823	9130019O22Rik	ZF
ENSMUSG00000062944	9130023H24Rik	ZF
ENSMUSG00000056014	A430033K04Rik	ZF
ENSMUSG00000030232	Aebp2	ZF
ENSMUSG00000056383	AI987944	ZF
ENSMUSG00000078435	AU041133	ZF
ENSMUSG00000074166	AW146154	ZF
ENSMUSG00000101303	B020011L13Rik	ZF
ENSMUSG00000074862	BC025920	ZF
ENSMUSG00000033883	Zfp267	ZF
ENSMUSG00000042156	Dzip1	ZF
ENSMUSG00000078580	E430018J23Rik	ZF
ENSMUSG00000052909	Gm9894	ZF
ENSMUSG00000061969	Gm5581	ZF
ENSMUSG00000069755	Zfp125	ZF
ENSMUSG00000074830	Zfp640	ZF
ENSMUSG00000074887	EU599041	ZF
ENSMUSG00000096192	Gm18856	ZF
ENSMUSG00000098137	Gm21940	ZF
ENSMUSG00000101373	Zfp813-ps	ZF
ENSMUSG00000047013	Fbxo41	ZF
ENSMUSG00000061374	Fiz1	ZF
ENSMUSG00000063905	Gm10139	ZF
ENSMUSG00000067929	Gm10226	ZF
ENSMUSG00000095909	Zfp997	ZF
ENSMUSG00000073448	Gm10509	ZF
ENSMUSG00000074837	Gm10770	ZF
ENSMUSG00000091347	Gm10772	ZF
ENSMUSG00000096856	Gm10778	ZF
ENSMUSG00000094475	Gm11007	ZF
ENSMUSG00000078895	Gm11009	ZF
ENSMUSG00000072915	Gm12258	ZF
ENSMUSG00000078502	Zfp268	ZF
ENSMUSG00000079008	Gm14124	ZF
ENSMUSG00000079009	Gm14139	ZF
ENSMUSG00000078877	Gm14295	ZF
ENSMUSG00000074527	Gm14296	ZF
ENSMUSG00000078878	Gm14305	ZF
ENSMUSG00000078880	Gm14308	ZF
ENSMUSG00000078864	Gm14322	ZF
ENSMUSG00000095362	Gm14325	ZF
ENSMUSG00000078862	Gm14326	ZF
ENSMUSG00000078903	Gm14391	ZF
ENSMUSG00000078905	Gm14393	ZF
ENSMUSG00000090093	Gm14399	ZF
ENSMUSG00000078872	Gm14401	ZF
ENSMUSG00000094786	Gm14403	ZF
ENSMUSG00000078865	Gm14406	ZF
ENSMUSG00000078876	Gm14408	ZF
ENSMUSG00000078869	Gm14409	ZF
ENSMUSG00000078870	Gm14410	ZF
ENSMUSG00000078868	Gm14412	ZF
ENSMUSG00000078867	Gm14418	ZF
ENSMUSG00000078875	Gm14419	ZF
ENSMUSG00000078881	Gm14434	ZF
ENSMUSG00000078902	Gm14443	ZF
ENSMUSG00000078906	Gm14444	ZF
ENSMUSG00000090015	Gm15446	ZF
ENSMUSG00000091594	Gm17067	ZF
ENSMUSG00000091195	Gm17332	ZF
ENSMUSG00000090963	Gm17655	ZF
ENSMUSG00000094429	Gm19965	ZF
ENSMUSG00000095648	Gm2004	ZF
ENSMUSG00000094932	Gm2007	ZF
ENSMUSG00000078886	Gm2026	ZF
ENSMUSG00000092544	Gm20422	ZF
ENSMUSG00000095193	Gm20939	ZF
ENSMUSG00000095993	Gm21060	ZF
ENSMUSG00000096734	Gm21836	ZF
ENSMUSG00000074735	Gm21994	ZF
ENSMUSG00000092225	Gm2381	ZF
ENSMUSG00000101415	Gm28168	ZF
ENSMUSG00000100305	Gm28360	ZF
ENSMUSG00000100265	Gm28363	ZF
ENSMUSG00000100235	Gm28557	ZF
ENSMUSG00000102030	Gm29106	ZF
ENSMUSG00000094942	Gm3604	ZF
ENSMUSG00000078899	Gm4631	ZF
ENSMUSG00000078897	Gm4724	ZF
ENSMUSG00000094076	Gm4767	ZF
ENSMUSG00000073427	Gm4924	ZF
ENSMUSG00000091183	Gm5141	ZF
ENSMUSG00000069475	Gm6020	ZF
ENSMUSG00000078887	Gm6710	ZF
ENSMUSG00000090744	Gm6871	ZF
ENSMUSG00000100617	Gm7145	ZF
ENSMUSG00000040775	Gm9772	ZF
ENSMUSG00000027439	Gzf1	ZF
ENSMUSG00000063568	Jazf1	ZF
ENSMUSG00000055239	Kcmf1	ZF
ENSMUSG00000048626	Klf17	ZF
ENSMUSG00000100512	Ovol3	ZF
ENSMUSG00000042496	Prdm10	ZF
ENSMUSG00000040478	Prdm13	ZF
ENSMUSG00000057637	Prdm2	ZF
ENSMUSG00000035456	Prdm8	ZF
ENSMUSG00000052751	Repin1	ZF
ENSMUSG00000067919	Rex2	ZF
ENSMUSG00000049878	Rlf	ZF
ENSMUSG00000058900	Rsl1	ZF
ENSMUSG00000074824	Rslcan18	ZF
ENSMUSG00000049532	Sall2	ZF
ENSMUSG00000024565	Sall3	ZF
ENSMUSG00000046982	Tshz1	ZF
ENSMUSG00000047907	Tshz2	ZF
ENSMUSG00000021217	Tshz3	ZF
ENSMUSG00000069114	Zbtb10	ZF
ENSMUSG00000046962	Zbtb21	ZF
ENSMUSG00000019826	Zbtb24	ZF
ENSMUSG00000068966	Zbtb34	ZF
ENSMUSG00000040433	Zbtb38	ZF
ENSMUSG00000044617	Zbtb39	ZF
ENSMUSG00000018750	Zbtb4	ZF
ENSMUSG00000060862	Zbtb40	ZF
ENSMUSG00000033964	Zbtb41	ZF
ENSMUSG00000037638	Zbtb42	ZF
ENSMUSG00000047412	Zbtb44	ZF
ENSMUSG00000027583	Zbtb46	ZF
ENSMUSG00000049657	Zbtb5	ZF
ENSMUSG00000028807	Zbtb8a	ZF
ENSMUSG00000048485	Zbtb8b	ZF
ENSMUSG00000079605	Zbtb9	ZF
ENSMUSG00000022335	Zfat	ZF
ENSMUSG00000055240	Zfp101	ZF
ENSMUSG00000030486	Zfp108	ZF
ENSMUSG00000074283	Zfp109	ZF
ENSMUSG00000051034	Zfp11	ZF
ENSMUSG00000087598	Zfp111	ZF
ENSMUSG00000052675	Zfp112	ZF
ENSMUSG00000068962	Zfp114	ZF
ENSMUSG00000057835	Zfp119a	ZF
ENSMUSG00000062101	Zfp119b	ZF
ENSMUSG00000068134	Zfp120	ZF
ENSMUSG00000094870	Zfp131	ZF
ENSMUSG00000092416	Zfp141	ZF
ENSMUSG00000026135	Zfp142	ZF
ENSMUSG00000036898	Zfp157	ZF
ENSMUSG00000067942	Zfp160	ZF
ENSMUSG00000050954	Zfp169	ZF
ENSMUSG00000057101	Zfp180	ZF
ENSMUSG00000049321	Zfp2	ZF
ENSMUSG00000052056	Zfp217	ZF
ENSMUSG00000061544	Zfp229	ZF
ENSMUSG00000047603	Zfp235	ZF
ENSMUSG00000042097	Zfp239	ZF
ENSMUSG00000022526	Zfp251	ZF
ENSMUSG00000063108	Zfp26	ZF
ENSMUSG00000060510	Zfp266	ZF
ENSMUSG00000062040	Zfp27	ZF
ENSMUSG00000030446	Zfp273	ZF
ENSMUSG00000031365	Zfp275	ZF
ENSMUSG00000062861	Zfp28	ZF
ENSMUSG00000047342	Zfp286	ZF
ENSMUSG00000039967	Zfp292	ZF
ENSMUSG00000047473	Zfp30	ZF
ENSMUSG00000046556	Zfp319	ZF
ENSMUSG00000057894	Zfp329	ZF
ENSMUSG00000017667	Zfp334	ZF
ENSMUSG00000074731	Zfp345	ZF
ENSMUSG00000063281	Zfp35	ZF
ENSMUSG00000070902	Zfp352	ZF
ENSMUSG00000044807	Zfp354c	ZF
ENSMUSG00000047264	Zfp358	ZF
ENSMUSG00000028799	Zfp362	ZF
ENSMUSG00000050919	Zfp366	ZF
ENSMUSG00000044934	Zfp367	ZF
ENSMUSG00000021514	Zfp369	ZF
ENSMUSG00000028389	Zfp37	ZF
ENSMUSG00000042063	Zfp386	ZF
ENSMUSG00000037001	Zfp39	ZF
ENSMUSG00000024276	Zfp397	ZF
ENSMUSG00000002617	Zfp40	ZF
ENSMUSG00000048410	Zfp407	ZF
ENSMUSG00000075040	Zfp408	ZF
ENSMUSG00000073423	Zfp414	ZF
ENSMUSG00000034538	Zfp418	ZF
ENSMUSG00000058402	Zfp420	ZF
ENSMUSG00000059475	Zfp426	ZF
ENSMUSG00000078994	Zfp429	ZF
ENSMUSG00000096795	Zfp433	ZF
ENSMUSG00000050945	Zfp438	ZF
ENSMUSG00000068130	Zfp442	ZF
ENSMUSG00000044876	Zfp444	ZF
ENSMUSG00000047036	Zfp445	ZF
ENSMUSG00000033961	Zfp446	ZF
ENSMUSG00000051037	Zfp455	ZF
ENSMUSG00000078995	Zfp456	ZF
ENSMUSG00000055341	Zfp457	ZF
ENSMUSG00000055480	Zfp458	ZF
ENSMUSG00000055560	Zfp459	ZF
ENSMUSG00000053600	Zfp472	ZF
ENSMUSG00000048012	Zfp473	ZF
ENSMUSG00000046886	Zfp474	ZF
ENSMUSG00000044519	Zfp488	ZF
ENSMUSG00000090659	Zfp493	ZF
ENSMUSG00000039081	Zfp503	ZF
ENSMUSG00000044452	Zfp507	ZF
ENSMUSG00000023892	Zfp51	ZF
ENSMUSG00000025470	Zfp511	ZF
ENSMUSG00000000823	Zfp512b	ZF
ENSMUSG00000058881	Zfp516	ZF
ENSMUSG00000046572	Zfp518b	ZF
ENSMUSG00000051341	Zfp52	ZF
ENSMUSG00000046541	Zfp526	ZF
ENSMUSG00000057409	Zfp53	ZF
ENSMUSG00000042439	Zfp532	ZF
ENSMUSG00000062518	Zfp534	ZF
ENSMUSG00000043456	Zfp536	ZF
ENSMUSG00000023882	Zfp54	ZF
ENSMUSG00000034071	Zfp551	ZF
ENSMUSG00000045598	Zfp553	ZF
ENSMUSG00000045519	Zfp560	ZF
ENSMUSG00000067424	Zfp563	ZF
ENSMUSG00000074221	Zfp568	ZF
ENSMUSG00000045252	Zfp574	ZF
ENSMUSG00000066721	Zfp575	ZF
ENSMUSG00000051550	Zfp579	ZF
ENSMUSG00000071291	Zfp58	ZF
ENSMUSG00000030443	Zfp583	ZF
ENSMUSG00000078779	Zfp59	ZF
ENSMUSG00000005621	Zfp592	ZF
ENSMUSG00000057842	Zfp595	ZF
ENSMUSG00000039789	Zfp597	ZF
ENSMUSG00000062794	Zfp599	ZF
ENSMUSG00000037640	Zfp60	ZF
ENSMUSG00000066007	Zfp600	ZF
ENSMUSG00000023284	Zfp605	ZF
ENSMUSG00000030386	Zfp606	ZF
ENSMUSG00000020420	Zfp607a	ZF
ENSMUSG00000057093	Zfp607b	ZF
ENSMUSG00000050605	Zfp61	ZF
ENSMUSG00000044676	Zfp612	ZF
ENSMUSG00000069476	Zfp616	ZF
ENSMUSG00000066880	Zfp617	ZF
ENSMUSG00000028358	Zfp618	ZF
ENSMUSG00000068959	Zfp619	ZF
ENSMUSG00000046311	Zfp62	ZF
ENSMUSG00000050846	Zfp623	ZF
ENSMUSG00000030604	Zfp626	ZF
ENSMUSG00000045639	Zfp629	ZF
ENSMUSG00000027667	Zfp639	ZF
ENSMUSG00000049606	Zfp644	ZF
ENSMUSG00000049739	Zfp646	ZF
ENSMUSG00000066797	Zfp648	ZF
ENSMUSG00000071281	Zfp65	ZF
ENSMUSG00000013419	Zfp651	ZF
ENSMUSG00000047141	Zfp654	ZF
ENSMUSG00000007812	Zfp655	ZF
ENSMUSG00000056592	Zfp658	ZF
ENSMUSG00000056824	Zfp663	ZF
ENSMUSG00000054893	Zfp667	ZF
ENSMUSG00000049728	Zfp668	ZF
ENSMUSG00000049755	Zfp672	ZF
ENSMUSG00000062743	Zfp677	ZF
ENSMUSG00000058291	Zfp68	ZF
ENSMUSG00000049410	Zfp683	ZF
ENSMUSG00000019338	Zfp687	ZF
ENSMUSG00000045251	Zfp688	ZF
ENSMUSG00000048921	Zfp689	ZF
ENSMUSG00000033669	Zfp7	ZF
ENSMUSG00000085795	Zfp703	ZF
ENSMUSG00000034429	Zfp707	ZF
ENSMUSG00000058883	Zfp708	ZF
ENSMUSG00000056019	Zfp709	ZF
ENSMUSG00000048897	Zfp710	ZF
ENSMUSG00000090641	Zfp712	ZF
ENSMUSG00000012640	Zfp715	ZF
ENSMUSG00000030469	Zfp719	ZF
ENSMUSG00000069184	Zfp72	ZF
ENSMUSG00000021510	Zfp729a	ZF
ENSMUSG00000058093	Zfp729b	ZF
ENSMUSG00000060630	Zfp735	ZF
ENSMUSG00000048280	Zfp738	ZF
ENSMUSG00000059975	Zfp74	ZF
ENSMUSG00000057691	Zfp746	ZF
ENSMUSG00000054381	Zfp747	ZF
ENSMUSG00000095432	Zfp748	ZF
ENSMUSG00000044501	Zfp758	ZF
ENSMUSG00000057396	Zfp759	ZF
ENSMUSG00000067928	Zfp760	ZF
ENSMUSG00000067430	Zfp763	ZF
ENSMUSG00000045757	Zfp764	ZF
ENSMUSG00000066838	Zfp772	ZF
ENSMUSG00000063535	Zfp773	ZF
ENSMUSG00000007216	Zfp775	ZF
ENSMUSG00000055150	Zfp78	ZF
ENSMUSG00000063047	Zfp780b	ZF
ENSMUSG00000051499	Zfp786	ZF
ENSMUSG00000074165	Zfp788	ZF
ENSMUSG00000011427	Zfp790	ZF
ENSMUSG00000074194	Zfp791	ZF
ENSMUSG00000095253	Zfp799	ZF
ENSMUSG00000039841	Zfp800	ZF
ENSMUSG00000074867	Zfp808	ZF
ENSMUSG00000057982	Zfp809	ZF
ENSMUSG00000003929	Zfp81	ZF
ENSMUSG00000066829	Zfp810	ZF
ENSMUSG00000055202	Zfp811	ZF
ENSMUSG00000055102	Zfp819	ZF
ENSMUSG00000098022	Zfp82	ZF
ENSMUSG00000069743	Zfp820	ZF
ENSMUSG00000031728	Zfp821	ZF
ENSMUSG00000069208	Zfp825	ZF
ENSMUSG00000071064	Zfp827	ZF
ENSMUSG00000050600	Zfp831	ZF
ENSMUSG00000046185	Zfp84	ZF
ENSMUSG00000058192	Zfp846	ZF
ENSMUSG00000058331	Zfp85	ZF
ENSMUSG00000096916	Zfp850	ZF
ENSMUSG00000093910	Zfp853	ZF
ENSMUSG00000074405	Zfp865	ZF
ENSMUSG00000043090	Zfp866	ZF
ENSMUSG00000054519	Zfp867	ZF
ENSMUSG00000060427	Zfp868	ZF
ENSMUSG00000054648	Zfp869	ZF
ENSMUSG00000097333	Zfp87	ZF
ENSMUSG00000095325	Zfp870	ZF
ENSMUSG00000024298	Zfp871	ZF
ENSMUSG00000074472	Zfp872	ZF
ENSMUSG00000061371	Zfp873	ZF
ENSMUSG00000069206	Zfp874a	ZF
ENSMUSG00000059839	Zfp874b	ZF
ENSMUSG00000089857	Zfp882	ZF
ENSMUSG00000072623	Zfp9	ZF
ENSMUSG00000024695	Zfp91	ZF
ENSMUSG00000031374	Zfp92	ZF
ENSMUSG00000055305	Zfp93	ZF
ENSMUSG00000059897	Zfp930	ZF
ENSMUSG00000078861	Zfp931	ZF
ENSMUSG00000059423	Zfp933	ZF
ENSMUSG00000074865	Zfp934	ZF
ENSMUSG00000055228	Zfp935	ZF
ENSMUSG00000064194	Zfp936	ZF
ENSMUSG00000060336	Zfp937	ZF
ENSMUSG00000062931	Zfp938	ZF
ENSMUSG00000074282	Zfp94	ZF
ENSMUSG00000050855	Zfp940	ZF
ENSMUSG00000060314	Zfp941	ZF
ENSMUSG00000071267	Zfp942	ZF
ENSMUSG00000053347	Zfp943	ZF
ENSMUSG00000033972	Zfp944	ZF
ENSMUSG00000059142	Zfp945	ZF
ENSMUSG00000071266	Zfp946	ZF
ENSMUSG00000063383	Zfp947	ZF
ENSMUSG00000067931	Zfp948	ZF
ENSMUSG00000032425	Zfp949	ZF
ENSMUSG00000072774	Zfp951	ZF
ENSMUSG00000053390	Zfp952	ZF
ENSMUSG00000098905	Zfp953	ZF
ENSMUSG00000062116	Zfp954	ZF
ENSMUSG00000094441	Zfp955a	ZF
ENSMUSG00000096910	Zfp955b	ZF
ENSMUSG00000045466	Zfp956	ZF
ENSMUSG00000058748	Zfp958	ZF
ENSMUSG00000003198	Zfp959	ZF
ENSMUSG00000096696	Zfp960	ZF
ENSMUSG00000052446	Zfp961	ZF
ENSMUSG00000092260	Zfp963	ZF
ENSMUSG00000091764	Zfp964	ZF
ENSMUSG00000078896	Zfp965	ZF
ENSMUSG00000089756	Zfp966	ZF
ENSMUSG00000095199	Zfp967	ZF
ENSMUSG00000078898	Zfp968	ZF
ENSMUSG00000095545	Zfp969	ZF
ENSMUSG00000095990	Zfp97	ZF
ENSMUSG00000078866	Zfp970	ZF
ENSMUSG00000074519	Zfp971	ZF
ENSMUSG00000074529	Zfp972	ZF
ENSMUSG00000078879	Zfp973	ZF
ENSMUSG00000070709	Zfp974	ZF
ENSMUSG00000069727	Zfp975	ZF
ENSMUSG00000074158	Zfp976	ZF
ENSMUSG00000092335	Zfp977	ZF
ENSMUSG00000078497	Zfp978	ZF
ENSMUSG00000066000	Zfp979	ZF
ENSMUSG00000058186	Zfp980	ZF
ENSMUSG00000056300	Zfp981	ZF
ENSMUSG00000078496	Zfp982	ZF
ENSMUSG00000035868	Zfp983	ZF
ENSMUSG00000078495	Zfp984	ZF
ENSMUSG00000065999	Zfp985	ZF
ENSMUSG00000078500	Zfp986	ZF
ENSMUSG00000066009	Zfp987	ZF
ENSMUSG00000078498	Zfp988	ZF
ENSMUSG00000086147	Zfp989	ZF
ENSMUSG00000078503	Zfp990	ZF
ENSMUSG00000067916	Zfp991	ZF
ENSMUSG00000070605	Zfp992	ZF
ENSMUSG00000063245	Zfp993	ZF
ENSMUSG00000096433	Zfp994	ZF
ENSMUSG00000078546	Zfp995	ZF
ENSMUSG00000049577	Zfpm1	ZF
ENSMUSG00000022306	Zfpm2	ZF
ENSMUSG00000053211	Zfy1	ZF
ENSMUSG00000000103	Zfy2	ZF
ENSMUSG00000002266	Zim1	ZF
ENSMUSG00000029627	Zkscan14	ZF
ENSMUSG00000038630	Zkscan16	ZF
ENSMUSG00000021327	Zkscan3	ZF
ENSMUSG00000054931	Zkscan4	ZF
ENSMUSG00000063488	Zkscan7	ZF
ENSMUSG00000063894	Zkscan8	ZF
ENSMUSG00000052676	Zmat1	ZF
ENSMUSG00000036721	Zscan12	ZF
ENSMUSG00000038797	Zscan2	ZF
ENSMUSG00000037017	Zscan21	ZF
ENSMUSG00000054715	Zscan22	ZF
ENSMUSG00000070420	Zscan25	ZF
ENSMUSG00000058028	Zscan5b	ZF
ENSMUSG00000073062	Zxdb	ZF
ENSMUSG00000034430	Zxdc	ZF
ENSMUSG00000040721	Zfhx2	HD
ENSMUSG00000038909	Kat7	ZF
ENSMUSG00000035576	L3mbtl1	ZF
ENSMUSG00000039089	L3mbtl3	ZF
ENSMUSG00000041565	L3mbtl4	ZF
ENSMUSG00000010505	Myt1	ZF
ENSMUSG00000061911	Myt1l	ZF
ENSMUSG00000033740	St18	ZF
ENSMUSG00000046380	Jrk	Others
ENSMUSG00000044390	Tigd3	Others
ENSMUSG00000047819	Tigd4	Others
ENSMUSG00000103906	Tigd5	Others
ENSMUSG00000014592	Camta1	Others
ENSMUSG00000040712	Camta2	Others
ENSMUSG00000006307	Kmt2b	Others
ENSMUSG00000024561	Mbd1	Others
ENSMUSG00000070814	Zswim9	Others
ENSMUSG00000040097	Flywch1	Others
ENSMUSG00000074397	Foxr1	Others
ENSMUSG00000071665	Foxr2	Others
ENSMUSG00000036180	Gatad2a	Others
ENSMUSG00000042390	Gatad2b	Others
ENSMUSG00000079681	Zglp1	Others
ENSMUSG00000037188	Grhl3	Others
ENSMUSG00000015942	Gtf2ird2	Others
ENSMUSG00000051149	Adnp	HD
ENSMUSG00000053950	Adnp2	HD
ENSMUSG00000058537	AW822073	HD
ENSMUSG00000074365	Crxos	HD
ENSMUSG00000062127	Cttnbp2nl	HD
ENSMUSG00000094204	Gm21915	HD
ENSMUSG00000075045	Gm4981	HD
ENSMUSG00000092109	Gm9376	HD
ENSMUSG00000061013	Mkx	HD
ENSMUSG00000071773	Rhox1	HD
ENSMUSG00000053909	Rhox10	HD
ENSMUSG00000071766	Rhox12	HD
ENSMUSG00000050197	Rhox13	HD
ENSMUSG00000051827	Rhox2a	HD
ENSMUSG00000079638	Rhox2b	HD
ENSMUSG00000079637	Rhox2c	HD
ENSMUSG00000095698	Rhox2d	HD
ENSMUSG00000096788	Rhox2e	HD
ENSMUSG00000095741	Rhox2f	HD
ENSMUSG00000079629	Rhox2g	HD
ENSMUSG00000079627	Rhox2h	HD
ENSMUSG00000071772	Rhox3a	HD
ENSMUSG00000095601	Rhox3a2	HD
ENSMUSG00000079636	Rhox3c	HD
ENSMUSG00000059626	Rhox3e	HD
ENSMUSG00000095510	Rhox3f	HD
ENSMUSG00000080933	Rhox3g	HD
ENSMUSG00000071769	Rhox3h	HD
ENSMUSG00000079639	Rhox4a	HD
ENSMUSG00000094945	Rhox4a2	HD
ENSMUSG00000071771	Rhox4b	HD
ENSMUSG00000079635	Rhox4c	HD
ENSMUSG00000079633	Rhox4d	HD
ENSMUSG00000071770	Rhox4e	HD
ENSMUSG00000079630	Rhox4f	HD
ENSMUSG00000079628	Rhox4g	HD
ENSMUSG00000095180	Rhox5	HD
ENSMUSG00000071767	Rhox7a	HD
ENSMUSG00000079626	Rhox7b	HD
ENSMUSG00000100133	Tgif2lx1	HD
ENSMUSG00000100194	Tgif2lx2	HD
ENSMUSG00000022361	Zhx1	HD
ENSMUSG00000071757	Zhx2	HD
ENSMUSG00000035877	Zhx3	HD
ENSMUSG00000093668	Pou5f2	HD
ENSMUSG00000068036	Afdn	Others
ENSMUSG00000051246	Msantd1	Others
ENSMUSG00000040054	Baz2a	Others
ENSMUSG00000026987	Baz2b	Others
ENSMUSG00000035478	Mbd3	Others
ENSMUSG00000030322	Mbd4	Others
ENSMUSG00000025409	Mbd6	Others
ENSMUSG00000071350	Setdb2	Others
ENSMUSG00000049038	Mterf2	Others
ENSMUSG00000021519	Mterf3	Others
ENSMUSG00000026273	Mterf4	Others
ENSMUSG00000058670	4932411N23Rik	Others
ENSMUSG00000049658	Bdp1	Others
ENSMUSG00000042508	Dmtf1	Others
ENSMUSG00000054199	Gon4l	Others
ENSMUSG00000041124	Msantd4	Others
ENSMUSG00000062627	Mysm1	Others
ENSMUSG00000036281	Snapc4	Others
ENSMUSG00000052616	Terb1	Others
ENSMUSG00000025925	Terf1	Others
ENSMUSG00000026803	Ttf1	Others
ENSMUSG00000034057	Myrfl	Others
ENSMUSG00000028423	Nfx1	Others
ENSMUSG00000072889	Nfxl1	Others
ENSMUSG00000071359	Tbpl1	Others
ENSMUSG00000002249	Tead3	Others
ENSMUSG00000020137	Thap2	Others
ENSMUSG00000039759	Thap3	Others
ENSMUSG00000026279	Thap4	Others
ENSMUSG00000022760	Thap7	Others

## Sheet: TF neuro Drosophila
ID	TF.name	TF.family	Phenotype
FBgn0014135	bnl	Others	lethal; recessive; visible; adult stage; abnormal cell migration; second instar larval stage; somatic clone; abnormal cell adhesion; third instar larval stage; hyperplasia; heat sensitive; abnormal locomotor behavior; abnormal size; viable; larval stage
FBgn0261953	TfAP-2	Others	abnormal planar polarity; lethal - all die before end of P-stage; some die during pharate adult stage; visible; abnormal size; increased cell death; larval stage; uncoordinated; adult stage; lethal; some die during immature adult stage; viable; recessive; abnormal behavior; abnormal courtship behavior; abnormal locomotor behavior; abnormal feeding behavior; male limited; abnormal sleep; abnormal …
FBgn0004795	retn	Others	lethal; some die during embryonic stage; lethal - all die during embryonic stage; recessive; female sterile; abnormal courtship behavior; partially; rescuable maternal effect; abnormal neuroanatomy; visible; abnormal mitotic cell cycle; germline clone; abnormal behavior; female semi-fertile; partially lethal; somatic clone; third instar larval stage
FBgn0261113	Xrp1	Others	lethal; partially lethal - majority die; abnormal smell perception; viable; visible; fertile; abnormal locomotor behavior; long lived; short lived; adult stage; progressive; male limited; female limited; cold sensitive
FBgn0015602	BEAF-32	ZF	abnormal cell shape; increased cell death; larval stage; abnormal cell number; abnormal neuroanatomy; adult stage; suppressor of variegation; visible; viable; partially lethal; maternal effect; female semi-sterile; enhancer of variegation; abnormal developmental rate; lethal; male limited
FBgn0015664	Dref	ZF	decreased cell number; increased occurrence of cell division; increased cell death; some die during pupal stage; decreased occurrence of cell division; larval stage; abnormal size; fertile; melanotic mass phenotype; lethal; abnormal neuroanatomy; lethal - all die during P-stage; viable; visible; cold sensitive
FBgn0003270	amos	bHLH	lethal; viable; visible; dominant; recessive; abnormal neuroanatomy; adult stage; lethal - all die during P-stage; cold sensitive
FBgn0000137	ase	bHLH	abnormal neuroanatomy; third instar larval stage; visible; heat sensitive; viable; increased cell number; adult stage; increased occurrence of cell division; embryonic stage 17; decreased occurrence of cell division; embryonic stage 16
FBgn0010433	ato	bHLH	abnormal neuroanatomy; somatic clone; abnormal cell polarity; decreased cell size; third instar larval stage; visible; decreased occurrence of cell division; increased cell death; partially lethal - majority die; abnormal behavior; uncoordinated; abnormal chemosensitive behavior; decreased cell number; increased cell size; larval stage; wild-type; viable; flightless; abnormal thermotaxis; adult s…
FBgn0024249	cato	bHLH	viable; abnormal neuroanatomy; embryonic stage; partially lethal; visible; male limited; female limited; cold sensitive
FBgn0023076	Clk	bHLH	increased cell death; abnormal locomotor rhythm; abnormal behavior; abnormal circadian rhythm; viable; visible; abnormal feeding behavior; adult stage; abnormal temperature response
FBgn0001994	crp	bHLH	lethal; recessive; visible; viable; fertile; abnormal pain response; lethal - all die during P-stage; female limited; increased cell size; increased cell death
FBgn0259938	cwo	bHLH	abnormal locomotor rhythm; recessive; viable; abnormal neuroanatomy; some die during pupal stage; abnormal circadian rhythm; adult stage; visible; male limited
FBgn0023094	cyc	bHLH	abnormal behavior; abnormal locomotor rhythm; recessive; abnormal mating rhythm; adult stage; male limited; abnormal eclosion rhythm; viable; abnormal circadian rhythm
FBgn0267821	da	bHLH	lethal; maternal effect; female limited; recessive; decreased fecundity; lethal - all die during embryonic stage; decreased occurrence of cell division; somatic clone; decreased cell number; abnormal neuroanatomy; some die during embryonic stage; wild-type; visible; female; short lived; decreased cell death; partially lethal; lethal - all die during P-stage
FBgn0023091	dimm	bHLH	abnormal neuroanatomy; lethal; fertile; lethal - all die during embryonic stage; partially lethal - majority die; visible; male limited; female limited; cold sensitive
FBgn0262656	Myc	bHLH	decreased body size; female sterile; female; male; decreased cell number; visible; lethal; female limited; recessive; wild-type; increased cell size; somatic clone; abnormal cell growth; cell non-autonomous; increased cell death; abnormal endomitotic cell cycle; abnormal mitotic cell cycle; abnormal size; increased cell growth; abnormal neuroanatomy; neoplasia; increased cell number; larval stage…
FBgn0010109	dpn	bHLH	lethal; abnormal behavior; abnormal neuroanatomy; decreased cell number; larval stage; cell lethal; germline clone; recessive; visible; viable; abnormal size; increased cell number; somatic clone; lethal - all die before end of larval stage; heat sensitive; abnormal cell death
FBgn0002631	E(spl)m5-HLH	bHLH	lethal - all die during embryonic stage; some die during pupal stage; viable; visible; male limited; increased cell number; abnormal neuroanatomy; embryonic stage
FBgn0002633	E(spl)m7-HLH	bHLH	visible; some die during pupal stage; increased occurrence of cell division; larval stage; conditional; viable; male limited; increased cell number; abnormal neuroanatomy; embryonic stage
FBgn0000591	E(spl)m8-HLH	bHLH	visible; dominant; lethal; recessive; lethal - all die during embryonic stage; some die during embryonic stage; neurogenic phenotype; abnormal neuroanatomy; viable; increased cell number; embryonic stage; decreased cell number; decreased occurrence of cell division; embryonic stage 11
FBgn0002734	E(spl)mdelta-HLH	bHLH	abnormal neuroanatomy; viable; visible; increased cell number; embryonic stage
FBgn0002735	E(spl)mgamma-HLH	bHLH	lethal - all die during embryonic stage; visible; viable; increased cell number; abnormal neuroanatomy; embryonic stage; third instar larval stage
FBgn0038402	Fer2	bHLH	abnormal locomotor behavior; adult stage; viable; short lived; lethal; visible; male limited; female limited; cold sensitive
FBgn0032209	Hand	bHLH	some die during third instar larval stage; lethal; decreased body size; abnormal locomotor rhythm; partially lethal - majority die; short lived; some die during immature adult stage; viable; abnormal neuroanatomy; some die during first instar larval stage; visible
FBgn0027788	Hey	bHLH	majority die during first instar larval stage; visible; abnormal neuroanatomy; embryonic stage; lethal; cold sensitive
FBgn0261283	SREBP	bHLH	lethal; lethal - all die before end of second instar larval stage; some die during second instar larval stage; visible; viable; recessive; decreased body size; partially lethal - majority live; abnormal neuroanatomy; abnormal size; adult stage
FBgn0002561	l(1)sc	bHLH	lethal - all die during embryonic stage; viable; abnormal neuroanatomy; short lived; decreased cell number; decreased occurrence of cell division; larval stage; visible
FBgn0002723	Met	bHLH	chemical resistant; visible; decreased fecundity; dominant; lethal; recessive; viable; wild-type; decreased occurrence of cell division; prepupal stage; abnormal neurophysiology; adult stage; conditional; partially lethal - majority die; larval stage
FBgn0032940	Mondo	bHLH	fertile; viable; lethal; recessive; abnormal developmental rate; partially lethal; conditional; abnormal feeding behavior; adult stage; lethal - all die during larval stage; abnormal stress response; chemical sensitive; decreased body size; larval stage
FBgn0263112	Mitf	bHLH	abnormal starvation stress response; adult stage; some die during larval stage; abnormal neuroanatomy; lethal - all die before end of larval stage; visible
FBgn0023215	Mnt	bHLH	lethal; recessive; fertile; decreased cell size; larval stage; abnormal starvation stress response; somatic clone; visible; abnormal heat stress response; abnormal neuroanatomy; third instar larval stage
FBgn0002922	nau	bHLH	flightless; sterile; lethal; female sterile; viable; lethal - all die during embryonic stage; lethal - all die during larval stage; abnormal locomotor behavior; larval stage; partially lethal; visible
FBgn0032651	Oli	bHLH	viable; abnormal neuroanatomy; embryonic stage; abnormal locomotor behavior; lethal; partially lethal; visible; male limited; female limited; cold sensitive
FBgn0004666	sim	bHLH	lethal - all die during embryonic stage; lethal; increased cell death; abnormal cell migration; decreased cell number; abnormal neuroanatomy; somatic clone; decreased occurrence of cell division; third instar larval stage; sterile; visible; viable; some die during embryonic stage; recessive; female sterile; male sterile; fertile; cold sensitive
FBgn0003513	ss	bHLH	visible; homeotic; flightless; abnormal behavior; abnormal memory; female semi-sterile; partially lethal; recessive; viable; lethal; abnormal gravitaxis; fertile; decreased occurrence of cell division; increased cell death; cell non-autonomous; cell autonomous; heat sensitive; abnormal neuroanatomy; somatic clone; abnormal cell number; adult stage; abnormal visual perception
FBgn0041092	tai	bHLH	lethal; larval stage; embryonic stage; recessive; decreased body size; abnormal size; adult stage; abnormal neuroanatomy; somatic clone; abnormal smell perception; abnormal locomotor behavior; pupal stage; third instar larval stage; abnormal sleep
FBgn0015550	tap	bHLH	lethal; recessive; abnormal tarsal response; heat sensitive; short lived; abnormal neuroanatomy; viable; adult stage; visible; P-stage; somatic clone
FBgn0264075	tgo	bHLH	lethal; recessive; abnormal neuroanatomy; visible; abnormal cell migration; oogenesis stage S9; oogenesis stage S10; somatic clone; viable; increased occurrence of cell division; short lived; male limited; female limited; cold sensitive
FBgn0003900	twi	bHLH	some die during embryonic stage; lethal - all die during embryonic stage; lethal; visible; recessive; wild-type; abnormal locomotor behavior; viable; male limited; female limited; cold sensitive
FBgn0263118	tx	bHLH	visible; hypoactive; uncoordinated; third instar larval stage; viable
FBgn0265193	Atf-2	bZIP	suppressor of variegation; abnormal immune response; abnormal osmotic stress response; abnormal locomotor behavior; decreased body size; adult stage; abnormal stress response
FBgn0036126	Irbp18	bZIP	radiation sensitive; lethal; chemical conditional; abnormal neuroanatomy; viable
FBgn0000370	crc	bZIP	lethal; decreased fecundity; female; visible; lethal - all die before end of pupal stage; some die during pupal stage; recessive; viable; partially lethal - majority die; fertile; short lived; lethal - all die during P-stage; abnormal locomotor behavior; adult stage; male; abnormal starvation stress response; abnormal feeding behavior; larval stage; nutrition conditional
FBgn0265784	CrebB	bZIP	lethal; abnormal locomotor rhythm; viable; abnormal neuroanatomy; lethal - all die before end of larval stage; some die during larval stage; abnormal body size; adult stage; abnormal learning; abnormal courtship behavior; female; abnormal mating; abnormal memory; abnormal sleep; abnormal behavior; chemical sensitive; wild-type; fertile; third instar larval stage; conditional; abnormal starvation …
FBgn0262975	cnc	bZIP	lethal; some die during embryonic stage; lethal - all die during embryonic stage; recessive; viable; visible; fertile; abnormal developmental rate; abnormal gravitaxis; increased mortality; adult stage; abnormal sleep; abnormal locomotor behavior; abnormal neurophysiology; third instar larval stage; heat sensitive; abnormal neuroanatomy; increased body size; larval stage; decreased size
FBgn0001150	gt	bZIP	abnormal body size; abnormal neuroanatomy; third instar larval stage; lethal; recessive; lethal - all die during embryonic stage; visible; some die during embryonic stage; gap; abnormal size; larval stage; viable
FBgn0001291	Jra	bZIP	lethal - all die during embryonic stage; abnormal planar polarity; some die during embryonic stage; recessive; lethal; visible; dominant; wild-type; some die during prepupal stage; viable; abnormal neuroanatomy; somatic clone; hypoactive; adult stage; male limited; female limited; cold sensitive
FBgn0001297	kay	bZIP	lethal; embryonic stage; recessive; some die during embryonic stage; lethal - all die during embryonic stage; visible; heat sensitive; abnormal neurophysiology; abnormal neuroanatomy; wild-type; abnormal planar polarity; abnormal wound healing; partially; viable; somatic clone; some die during pupal stage; abnormal developmental rate; partially lethal; abnormal locomotor rhythm; third instar larv…
FBgn0016076	vri	bZIP	visible; recessive; decreased cell size; abnormal locomotor rhythm; some die during embryonic stage; maternal effect; lethal - all die during embryonic stage; female sterile; non-rescuable maternal effect; lethal; viable; abnormal size; adult stage; larval stage; somatic clone; lethal - all die during larval stage; some die during pupal stage
FBgn0264442	ab	ZF	male sterile; visible; recessive; viable; partially lethal - majority die; lethal; lethal - all die during larval stage; wild-type; dominant; lethal - all die before end of pupal stage; some die during pupal stage; abnormal neuroanatomy; fertile; lethal - all die during P-stage; lethal - all die during embryonic stage; male limited; female limited; cold sensitive
FBgn0283451	br	ZF	visible; abnormal developmental rate; second instar larval stage; heat sensitive; viable; lethal; recessive; lethal - all die before end of prepupal stage; some die during prepupal stage; lethal - all die before end of pupal stage; some die during pupal stage; partially lethal; lethal - all die before end of larval stage; some die during larval stage; maternal effect; cold sensitive; some die dur…
FBgn0000233	btd	ZF	some die during embryonic stage; lethal - all die during embryonic stage; recessive; wild-type; homeotic; somatic clone; viable; lethal; visible; male limited; female limited; cold sensitive; abnormal neuroanatomy; larval stage
FBgn0043364	cbt	ZF	abnormal neuroanatomy; viable; pharate adult stage; lethal - all die during embryonic stage; some die during embryonic stage; partially; abnormal cell polarity; decreased occurrence of cell division; larval stage; visible; increased cell number; partially lethal; abnormal developmental rate; conditional; lethal; cold sensitive; abnormal circadian rhythm; abnormal locomotor behavior; adult stage
FBgn0262636	dati	ZF	lethal; uncoordinated; abnormal pain response; viable; female sterile; partially lethal - majority die; short lived; abnormal locomotor behavior; partially lethal; visible; male limited; female limited; cold sensitive
FBgn0261705	CG42741	ZF	abnormal neuroanatomy; abnormal flight; visible
FBgn0035691	CG7386	ZF	abnormal neuroanatomy; lethal - all die during P-stage; visible; male limited
FBgn0004859	ci	ZF	visible; recessive; wild-type; cold sensitive; lethal; some die during embryonic stage; lethal - all die during embryonic stage; dominant; abnormal mitotic cell cycle; cell autonomous; decreased occurrence of cell division; larval stage; sterile; abnormal neuroanatomy; decreased cell number; viable; partially lethal; increased occurrence of cell division; increased cell number; oogenesis; neoplas…
FBgn0020309	crol	ZF	lethal; lethal - all die before end of pupal stage; some die during pupal stage; suppressor of variegation; dominant; recessive; decreased occurrence of cell division; third instar larval stage; viable; fertile; abnormal neuroanatomy; larval stage; long lived; abnormal locomotor behavior; adult stage; female limited; increased occurrence of cell division; increased cell death; abnormal flight; co…
FBgn0263239	dar1	ZF	lethal; abnormal neuroanatomy; larval stage; somatic clone; recessive; viable
FBgn0031375	erm	ZF	fertile; increased cell number; abnormal neuroanatomy; larval stage; lethal; visible; increased occurrence of cell division; embryonic stage; somatic clone
FBgn0287768	esg	ZF	lethal; recessive; some die during embryonic stage; chemical sensitive; lethal - all die during embryonic stage; visible; lethal - all die before end of larval stage; some die during larval stage; lethal - all die before end of pupal stage; some die during pupal stage; wild-type; decreased occurrence of cell division; heat sensitive; viable; dominant; female sterile; fertile; partially lethal - m…
FBgn0004652	fru	ZF	abnormal courtship behavior; hypoactive; abnormal behavior; male; male semi-sterile; abnormal mating; semi-fertile; male sterile; visible; abnormal stress response; semi-sterile; lethal; some die during prepupal stage; abnormal neuroanatomy; adult stage; female; sterile; abnormal song; partially lethal - majority die; lethal - all die before end of pupal stage; some die during pupal stage; domina…
FBgn0004618	gl	ZF	abnormal behavior; larval stage; abnormal temperature response; abnormal auditory perception; abnormal neurophysiology; abnormal neuroanatomy; visible; abnormal cell number; increased cell death; P-stage; partially lethal; abnormal eye color; viable; decreased cell number; photoperiod response variant; abnormal phototaxis; fertile; lethal; recessive; heat sensitive; wild-type
FBgn0001180	hb	ZF	lethal - all die during embryonic stage; gap; some die during embryonic stage; recessive; decreased occurrence of cell division; embryonic stage 14; visible; lethal; embryonic stage; homeotic; pair rule phenotype; maternal effect; heat sensitive; embryonic/larval segmentation phenotype; partially lethal - majority die; dominant; viable; abnormal neuroanatomy; female; lethal - all die before end o…
FBgn0001185	her	ZF	partially lethal - majority die; abnormal sex-determination; lethal; female; maternal effect; recessive; some die during embryonic stage; lethal - all die during embryonic stage; heat sensitive; wild-type; female sterile; fertile; abnormal neuroanatomy; lethal - all die during P-stage; visible; male limited
FBgn0261434	hkb	ZF	abnormal neuroanatomy; lethal - all die during embryonic stage; wild-type; viable; lethal; partially lethal - majority die; visible; partially lethal; male limited; female limited; cold sensitive
FBgn0027339	jim	ZF	fertile; abnormal neuroanatomy; lethal
FBgn0011236	ken	ZF	lethal; some die during pupal stage; abnormal phototaxis; abnormal locomotor behavior; abnormal neurophysiology; visible; adult stage; recessive; dominant; somatic clone; lethal - all die before end of first instar larval stage
FBgn0013469	klu	ZF	abnormal feeding behavior; lethal; decreased body size; abnormal neuroanatomy; larval stage; partially lethal - majority die; decreased cell death; visible; decreased cell size; somatic clone; increased cell number; decreased cell growth; cold sensitive
FBgn0001325	Kr	ZF	lethal; visible; decreased occurrence of cell division; some die during embryonic stage; lethal - all die during embryonic stage; recessive; abnormal neuroanatomy; heat sensitive; embryonic stage 14; melanotic mass phenotype; gap; viable; increased occurrence of cell division; embryonic stage 16
FBgn0265276	l(3)neo38	ZF	lethal; partially lethal - majority die; recessive; abnormal pain response; viable; abnormal flight; visible
FBgn0283521	lola	ZF	lethal; partially lethal - majority die; recessive; abnormal neuroanatomy; some die during embryonic stage; lethal - all die during embryonic stage; wild-type; abnormal cell migration; somatic clone; visible; viable; abnormal behavior; fertile; abnormal flight; lethal - all die during P-stage; abnormal body color; abnormal courtship behavior; embryonic stage; female limited; dominant; abnormal lo…
FBgn0267033	mamo	ZF	some die during pupal stage; lethal; viable; germline clone; abnormal meiotic cell cycle; female sterile; decreased fecundity; female; majority die during embryonic stage; increased mortality during development; maternal effect; visible; abnormal neuroanatomy; pupal stage
FBgn0003028	ovo	ZF	female sterile; abnormal feeding behavior; long lived; dominant; decreased fecundity; female; some die during embryonic stage; lethal - all die during embryonic stage; maternal effect; lethal; some die during larval stage; visible; heat sensitive; male fertile; recessive; female fertile; wild-type; somatic clone; fertile; some die during pupal stage; viable; partially lethal; cold sensitive; decr…
FBgn0003053	peb	ZF	visible; some die during embryonic stage; lethal - all die during embryonic stage; recessive; abnormal planar polarity; lethal; somatic clone; abnormal oviposition; wild-type; partially; abnormal neuroanatomy; abnormal eye color
FBgn0002521	pho	ZF	lethal; lethal - all die before end of P-stage; some die during pharate adult stage; lethal - all die before end of pupal stage; some die during pupal stage; recessive; some die during embryonic stage; maternal effect; lethal - all die during embryonic stage; wild-type; viable; visible; decreased cell growth; somatic clone; abnormal neuroanatomy; male limited
FBgn0267337	rn	ZF	male sterile; female semi-sterile; recessive; visible; sterile; viable; lethal; female sterile; fertile; short lived; abnormal locomotor behavior; abnormal neuroanatomy; abnormal pain response; flightless; male limited; female limited; cold sensitive; adult stage
FBgn0004880	scrt	ZF	visible; uncoordinated; abnormal behavior; recessive; some die during pupal stage; partially lethal; female limited
FBgn0002573	sens	ZF	visible; dominant; wild-type; lethal; recessive; abnormal neuroanatomy; cell autonomous; increased cell death; embryonic stage; some die during pupal stage
FBgn0028991	seq	ZF	lethal; non-suppressor of variegation; recessive; abnormal neuroanatomy; adult stage; somatic clone; some die during embryonic stage; lethal - all die during embryonic stage; third instar larval stage; visible; male limited; female limited; cold sensitive
FBgn0003396	shn	ZF	some die during embryonic stage; lethal - all die during embryonic stage; recessive; lethal; abnormal neuroanatomy; increased cell number; somatic clone; increased occurrence of cell division; decreased cell size; abnormal cytokinesis; spermatogenesis; visible; larval stage; abnormal memory; abnormal circadian rhythm; heat sensitive; viable; abnormal locomotor behavior; adult stage
FBgn0003448	sna	ZF	visible; dominant; lethal; some die during embryonic stage; lethal - all die during embryonic stage; decreased occurrence of cell division; embryonic stage 14; recessive; abnormal size; embryonic stage; wild-type; abnormal locomotor behavior; adult stage; viable; male limited
FBgn0010768	sqz	ZF	lethal; abnormal neuroanatomy; lethal - all die before end of larval stage; some die during larval stage; recessive; visible; wild-type; abnormal locomotor behavior
FBgn0013263	Trl	ZF	lethal; visible; lethal - all die before end of larval stage; some die during larval stage; recessive; enhancer of variegation; partially lethal; maternal effect; decreased fecundity; partially lethal - majority die; embryonic stage; lethal - all die before end of P-stage; some die during embryonic stage; homeotic; non-suppressor of variegation; male semi-sterile; abnormal meiotic cell cycle; fem…
FBgn0003870	ttk	ZF	lethal; recessive; abnormal visual behavior; visible; semidominant; partially lethal - majority die; some die during embryonic stage; lethal - all die during embryonic stage; abnormal mitotic cell cycle; abnormal cell shape; increased occurrence of cell division; increased cell number; oogenesis; abnormal neuroanatomy; lethal - all die before end of pupal stage; some die during pupal stage; heat …
FBgn0001983	wor	ZF	some die during embryonic stage; lethal - all die during embryonic stage; recessive; partially lethal - majority die; decreased occurrence of cell division; decreased cell number; abnormal neuroanatomy; embryonic stage 11; viable; visible; lethal; female limited; increased cell number; increased occurrence of cell division
FBgn0037446	Zif	ZF	lethal; recessive; lethal - all die during P-stage; visible; female limited; abnormal neuroanatomy; decreased cell size; somatic clone; abnormal cell shape; abnormal cell polarity; lethal - all die during embryonic stage; third instar larval stage
FBgn0039283	danr	Others	homeotic; adult stage; abnormal size; visible; somatic clone - Minute background; abnormal neuroanatomy; viable
FBgn0035626	lin-28	Others	abnormal locomotor behavior; adult stage; decreased body size; abnormal developmental rate; pupal stage; recessive; increased body size; majority die during pharate adult stage; viable; visible; abnormal eye color
FBgn0004837	Su(H)	Others	lethal; lethal - all die before end of pupal stage; some die during pupal stage; neurogenic phenotype; visible; recessive; abnormal memory; adult stage; lethal - all die before end of larval stage; some die during larval stage; somatic clone; wild-type; abnormal neuroanatomy; increased cell number; increased cell size; third instar larval stage; increased cell death; abnormal mitotic cell cycle; …
FBgn0004198	ct	HD	visible; recessive; lethal; partially lethal; increased cell size; abnormal neurophysiology; abnormal auditory perception; abnormal neuroanatomy; abnormal cell number; some die during embryonic stage; lethal - all die during embryonic stage; decreased cell number; oogenesis; somatic clone; male; lethal - all die before end of larval stage; some die during larval stage; viable; fertile; cell letha…
FBgn0028996	onecut	HD	fertile; lethal; recessive; abnormal pain response; viable
FBgn0000504	dsx	Others	decreased occurrence of cell division; abnormal courtship behavior; male; abnormal sex-determination; visible; female; abnormal body color; abnormal song; male sterile; recessive; hyperactive; sterile; abnormal neuroanatomy; female semi-sterile; dominant; chemical sensitive; heat sensitive; lethal; female sterile; viable; partially lethal; fertile; male semi-fertile; adult stage; male limited; ab…
FBgn0011766	E2f1	Others	lethal; abnormal developmental rate; recessive; increased cell size; decreased cell size; somatic clone; abnormal size; abnormal cell shape; abnormal cell adhesion; decreased occurrence of cell division; lethal - all die before end of second instar larval stage; female sterile; enhancer of variegation; larval stage; suppressor of variegation; wild-type; non-suppressor of variegation; non-enhancer…
FBgn0001319	kn	Others	visible; abnormal neuroanatomy; partially lethal - majority die; lethal - all die during embryonic stage; cell non-autonomous; recessive; some die during embryonic stage; abnormal smell perception; heat sensitive; lethal; late embryonic stage; decreased cell number; embryonic stage; increased occurrence of cell division; somatic clone; viable; chemical sensitive; partially lethal; male limited; f…
FBgn0000097	aop	Others	some die during embryonic stage; lethal - all die during embryonic stage; decreased cell number; embryonic stage; partially lethal - majority die; visible; abnormal planar polarity; semi-sterile; adult stage; abnormal neuroanatomy; increased cell number; long lived; neoplasia; spermatogenesis; recessive; larval stage; lethal; some die during immature adult stage; viable; abnormal cell number; sho…
FBgn0000567	Eip74EF	Others	lethal - all die before end of P-stage; some die during pharate adult stage; recessive; lethal; some die during larval stage; short lived; abnormal neuroanatomy; heat sensitive; viable
FBgn0003118	pnt	Others	lethal; recessive; some die during embryonic stage; lethal - all die during embryonic stage; abnormal mitotic cell cycle; decreased cell number; embryonic stage 15; embryonic stage; increased cell number; abnormal neuroanatomy; larval stage; lethal - all die before end of larval stage; some die during larval stage; lethal - all die before end of pupal stage; some die during pupal stage; abnormal …
FBgn0038197	foxo	Others	decreased body size; abnormal feeding behavior; decreased cell size; abnormal starvation stress response; decreased occurrence of cell division; larval stage; long lived; wild-type; third instar larval stage; lethal; abnormal locomotor behavior; female; chemical resistant; decreased fecundity; abnormal neuroanatomy; increased cell death; visible; short lived; abnormal developmental rate; decrease…
FBgn0262477	FoxP	Others	abnormal neurophysiology; abnormal courtship behavior; male; abnormal locomotor behavior; abnormal flight; abnormal pain response; abnormal size; abnormal neuroanatomy; abnormal behavior; abnormal learning; third instar larval stage; viable; adult stage; visible; male limited; partially lethal - majority die; majority die during pupal stage; short lived
FBgn0015396	jumu	Others	lethal; lethal - all die before end of larval stage; some die during larval stage; heat sensitive; enhancer of variegation; suppressor of variegation; recessive; wild-type; abnormal meiotic cell cycle; abnormal mitotic cell cycle; fertile; viable; abnormal immune response; adult stage; partially lethal - majority die; abnormal neuroanatomy
FBgn0001138	grn	Others	visible; recessive; some die during embryonic stage; lethal - all die during embryonic stage; abnormal neuroanatomy; lethal
FBgn0003117	pnr	Others	some die during embryonic stage; lethal - all die during embryonic stage; recessive; visible; increased cell number; dominant; lethal; viable; cell non-autonomous; abnormal planar polarity; short lived; abnormal neuroanatomy; adult stage; decreased cell number; wandering third instar larval stage; fertile; partially lethal - majority die
FBgn0014179	gcm	Others	lethal; abnormal neuroanatomy; recessive; increased cell number; decreased cell number; increased cell death; third instar larval stage; some die during embryonic stage; lethal - all die during embryonic stage; decreased fecundity; visible; heat sensitive; lethal - all die before end of larval stage; some die during larval stage; increased occurrence of cell division; somatic clone; melanotic mas…
FBgn0019809	gcm2	Others	abnormal neuroanatomy; some die during second instar larval stage; viable; visible
FBgn0259211	grh	Others	abnormal planar polarity; abnormal wound healing; embryonic stage 17; some die during embryonic stage; abnormal locomotor behavior; dominant; lethal - all die during embryonic stage; lethal; recessive; somatic clone; some die during larval stage; partially lethal - majority die; decreased occurrence of cell division; increased occurrence of cell division; increased cell number; abnormal cell numb…
FBgn0000014	abd-A	HD	lethal; homeotic; some die during embryonic stage; lethal - all die during embryonic stage; recessive; visible; dominant; abnormal neuroanatomy; abnormal cell size; abnormal cell shape; increased occurrence of cell division; embryonic stage; heat sensitive; viable; female sterile; male sterile; increased cell number; embryonic stage 15; lethal - all die before end of larval stage; some die during…
FBgn0000015	Abd-B	HD	lethal; male sterile; female sterile; visible; homeotic; somatic clone; abnormal body color; recessive; abnormal cell death; female limited; larval stage; abnormal neuroanatomy; adult stage; increased cell number; sterile; partially lethal; dominant; lethal - all die before end of larval stage; some die during larval stage; male; fertile; semi-sterile; decreased cell number; increased occurrence …
FBgn0260642	Antp	HD	lethal; lethal - all die before end of P-stage; some die during pharate adult stage; some die during immature adult stage; viable; lethal - all die before end of larval stage; some die during larval stage; recessive; visible; somatic clone; lethal - all die before end of pupal stage; some die during pupal stage; abnormal neuroanatomy; increased occurrence of cell division; homeotic; dominant; abn…
FBgn0267978	ap	HD	visible; male sterile; female sterile; recessive; female fertile; abnormal mating; abnormal courtship behavior; male; lethal; some die during immature adult stage; partially lethal - majority die; abnormal stress response; abnormal heat stress response; semi-fertile; partially lethal; female; fertile; abnormal size; heat sensitive; partially lethal - majority live; male fertile; viable; dominant;…
FBgn0015904	ara	HD	lethal; recessive; female sterile; male sterile; visible; decreased occurrence of cell division; larval stage; partially lethal - majority die; viable; abnormal neuroanatomy; cold sensitive
FBgn0000529	bsh	HD	viable; abnormal neuroanatomy; somatic clone; partially lethal; visible; male limited; female limited; cold sensitive
FBgn0004863	C15	HD	partially lethal; some die during immature adult stage; recessive; viable; lethal; visible; male limited; female limited; cold sensitive; abnormal neuroanatomy; adult stage
FBgn0031232	CG11617	HD	fertile; abnormal neuroanatomy; lethal; partially lethal; visible; male limited; female limited; cold sensitive
FBgn0261723	Dbx	HD	viable; abnormal neuroanatomy; decreased cell number; late embryonic stage
FBgn0000157	Dll	HD	visible; dominant; homeotic; lethal - all die before end of P-stage; some die during pharate adult stage; lethal - all die before end of larval stage; some die during larval stage; abnormal neuroanatomy; larval stage; abnormal chemosensitive behavior; some die during embryonic stage; lethal - all die during embryonic stage; recessive; lethal; decreased occurrence of cell division; somatic clone; …
FBgn0000492	Dr	HD	lethal; visible; adult stage; some die during embryonic stage; lethal - all die during embryonic stage; viable; semidominant; recessive; increased cell death; abnormal locomotor behavior; partially lethal; wild-type; abnormal behavior; dominant; abnormal neuroanatomy; embryonic stage 15; decreased cell number; increased cell size; abnormal cell migration; decreased occurrence of cell division; Mi…
FBgn0000576	ems	HD	abnormal neuroanatomy; increased cell death; larval stage; adult stage; decreased cell number; pupal stage; somatic clone; some die during embryonic stage; lethal - all die during embryonic stage; recessive; viable; partially lethal; visible; male limited; female limited; cold sensitive
FBgn0000577	en	HD	visible; lethal; some die during embryonic stage; lethal - all die during embryonic stage; recessive; viable; dominant; female semi-fertile; heat sensitive; abnormal neuroanatomy; segment polarity phenotype; embryonic stage; sterile; pair rule phenotype; short lived; abnormal size; increased cell death; third instar larval stage; male limited; adult stage; embryonic/larval segmentation phenotype;…
FBgn0000606	eve	HD	decreased occurrence of cell division; lethal; increased cell death; embryonic stage; pair rule phenotype; abnormal cell polarity; gastrula stage; abnormal neuroanatomy; heat sensitive; some die during embryonic stage; lethal - all die during embryonic stage; recessive; wild-type; embryonic stage 17; viable
FBgn0000611	exd	HD	visible; recessive; pair rule phenotype; some die during embryonic stage; lethal - all die during embryonic stage; lethal; lethal - all die before end of larval stage; some die during larval stage; lethal - all die before end of P-stage; some die during pharate adult stage; wild-type; abnormal neuroanatomy; partially lethal - majority die; short lived; lethal - all die during larval stage; abnorm…
FBgn0041156	exex	HD	abnormal neuroanatomy; embryonic stage; visible; third instar larval stage
FBgn0040318	HGTX	HD	abnormal neuroanatomy; third instar larval stage; viable; visible; cold sensitive
FBgn0038852	HHEX	HD	fertile; abnormal neuroanatomy; lethal; male limited; decreased body size; female limited; viable; partially lethal; visible; cold sensitive
FBgn0001235	hth	HD	visible; some die during embryonic stage; lethal - all die during embryonic stage; recessive; lethal; cell autonomous; abnormal neuroanatomy; decreased cell number; embryonic stage 15; abnormal size; somatic clone; homeotic; male; viable; abnormal planar polarity; cell non-autonomous; lethal - all die before end of larval stage; some die during larval stage; heat sensitive; increased cell number;…
FBgn0025776	ind	HD	abnormal neuroanatomy; viable; visible
FBgn0011278	lbe	HD	abnormal locomotor behavior; viable; abnormal neuroanatomy; late embryonic stage
FBgn0026411	Lim1	HD	some die during pupal stage; lethal; visible; recessive; lethal - all die before end of P-stage; some die during pharate adult stage; abnormal locomotor behavior; wild-type; viable
FBgn0002023	Lim3	HD	lethal - all die before end of larval stage; some die during larval stage; recessive; lethal; abnormal neuroanatomy; viable; visible; short lived; partially lethal; female limited
FBgn0014343	mirr	HD	lethal; visible; dominant; recessive; viable; some die during embryonic stage; lethal - all die during embryonic stage; maternal effect; abnormal planar polarity; abnormal locomotor behavior; cell non-autonomous; decreased occurrence of cell division; larval stage; lethal - all die before end of larval stage; some die during larval stage; abnormal neuroanatomy; flightless
FBgn0004102	oc	HD	visible; abnormal eclosion rhythm; some die during embryonic stage; lethal - all die during embryonic stage; recessive; lethal; viable; female sterile; abnormal visual behavior; abnormal neuroanatomy; some die during pupal stage; abnormal neurophysiology; progressive; somatic clone
FBgn0025360	Optix	HD	lethal - all die during embryonic stage; abnormal neuroanatomy; abnormal size; adult stage; abnormal cell shape; abnormal cell polarity; abnormal cell adhesion; late third instar larval stage; somatic clone; lethal; lethal - all die during larval stage; visible; recessive; increased cell death
FBgn0261588	pdm3	HD	abnormal locomotor behavior; abnormal neurophysiology; adult stage; abnormal smell perception; abnormal neuroanatomy; abnormal size; lethal; viable; third instar larval stage; some die during larval stage; visible
FBgn0023489	Pph13	HD	some die during pupal stage; abnormal phototaxis; adult stage; progressive; lethal; cold sensitive
FBgn0011701	repo	HD	lethal; abnormal neuroanatomy; some die during embryonic stage; abnormal memory; adult stage; lethal - all die during embryonic stage; abnormal neurophysiology; recessive; dominant; viable; visible; male limited; female limited; cold sensitive; RU486 conditional
FBgn0020617	Rx	HD	abnormal neuroanatomy; decreased cell number; decreased cell size; decreased occurrence of cell division; third instar larval stage; visible; somatic clone; P-stage; increased cell size
FBgn0040918	schlank	HD	lethal; decreased body size; abnormal developmental rate; abnormal neuroanatomy; larval stage; some die during larval stage; female sterile germline-dependent; germline clone; viable; lethal - all die before end of larval stage; abnormal starvation stress response; RU486 conditional; visible; male limited
FBgn0003339	Scr	HD	lethal; visible; recessive; some die during embryonic stage; lethal - all die during embryonic stage; viable; homeotic; dominant; heat sensitive; wild-type; abnormal neuroanatomy; increased cell number; first instar larval stage; lethal - all die during P-stage; abnormal flight
FBgn0287186	scro	HD	lethal; abnormal neuroanatomy; visible; viable
FBgn0003460	so	HD	abnormal cell growth; visible; increased cell death; abnormal size; adult stage; recessive; lethal; lethal - all die before end of first instar larval stage; some die during first instar larval stage; fertile; partially lethal - majority live; some die during embryonic stage; increased occurrence of cell division; larval stage; increased cell number; decreased cell number; lethal - all die during…
FBgn0003896	tup	HD	abnormal neuroanatomy; embryonic stage; visible; abnormal neurophysiology; first instar larval stage; recessive; some die during embryonic stage; lethal - all die during embryonic stage; lethal; partially lethal - majority die; viable; lethal - all die during first instar larval stage; decreased size; adult stage; somatic clone; partially lethal - majority live; cold sensitive
FBgn0003944	Ubx	HD	decreased cell size; cell autonomous; visible; recessive; dominant; increased occurrence of cell division; embryonic stage; partially lethal; viable; lethal; fertile; abnormal neuroanatomy; decreased cell number; first instar larval stage; homeotic; heat sensitive; wild-type; some die during embryonic stage; lethal - all die during embryonic stage; somatic clone; decreased occurrence of cell divi…
FBgn0024184	unc-4	HD	viable; visible; male limited; abnormal neuroanatomy; third instar larval stage
FBgn0261930	vnd	HD	some die during embryonic stage; lethal - all die during embryonic stage; recessive; partially lethal; abnormal neuroanatomy; increased cell death; lethal; embryonic stage; viable
FBgn0263511	Vsx1	HD	fertile; abnormal neuroanatomy; pharate adult stage; abnormal developmental rate
FBgn0005558	ey	HD	visible; partially lethal; viable; lethal - all die before end of pupal stage; some die during pupal stage; recessive; fertile; lethal; increased cell death; abnormal size; adult stage; heat sensitive; decreased cell size; short lived; male limited; abnormal neuroanatomy; female limited; cold sensitive; increased cell growth; somatic clone; hyperplasia; third instar larval stage
FBgn0019650	toy	HD	some die during larval stage; some die during P-stage; recessive; lethal; partially lethal - majority die; increased cell death; abnormal neuroanatomy; wild-type; some die during pharate adult stage; viable; cold sensitive; visible
FBgn0000028	acj6	HD	abnormal locomotor behavior; larval stage; adult stage; abnormal smell perception; abnormal neurophysiology; abnormal behavior; abnormal chemosensitive behavior; recessive; abnormal neuroanatomy; cell autonomous; cell non-autonomous; somatic clone; lethal; pupal stage; fertile; viable
FBgn0085424	nub	HD	visible; abnormal size; adult stage A1; abnormal neuroanatomy; dominant; suppressor of variegation; viable; some die during pupal stage; lethal; third instar larval stage; partially lethal; male limited; female limited; increased occurrence of cell division; embryonic stage 16
FBgn0004394	pdm2	HD	lethal; heat sensitive; fertile; viable; abnormal neuroanatomy; embryonic stage; partially lethal; male limited; female limited; cold sensitive
FBgn0086680	vvl	HD	lethal; abnormal neuroanatomy; recessive; some die during embryonic stage; lethal - all die during embryonic stage; wild-type; visible; dominant; lethal - all die before end of P-stage; neoplasia; abnormal size; melanotic mass phenotype; viable; decreased cell number; adult stage
FBgn0001222	Hsf	Others	lethal; recessive; female sterile; abnormal stress response; female sterile germline-dependent; lethal - all die before end of larval stage; some die during larval stage; abnormal heat stress response; abnormal neurophysiology; increased mortality; adult stage; wild-type; abnormal neuroanatomy; viable
FBgn0284249	Adf1	Others	lethal; recessive; abnormal memory; partially lethal - majority die; embryonic stage; wild-type; abnormal neuroanatomy; larval stage; viable; visible; abnormal neurophysiology; somatic clone; abnormal locomotor behavior
FBgn0036900	CG8765	Others	viable; lethal; abnormal neuroanatomy; visible; cold sensitive
FBgn0039350	jigr1	Others	fertile; abnormal neuroanatomy; visible; viable; lethal - all die during larval stage; abnormal size; adult stage
FBgn0004101	bs	Others	visible; recessive; heat sensitive; abnormal memory; adult stage; partially lethal; viable; lethal; lethal - all die before end of larval stage; some die during larval stage; decreased cell size; cell autonomous; dominant; wild-type; lethal - all die before end of P-stage; some die during pharate adult stage; lethal - all die before end of pupal stage; some die during pupal stage; somatic clone; …
FBgn0011656	Mef2	Others	lethal; some die during embryonic stage; lethal - all die during embryonic stage; abnormal size; adult stage; recessive; partially lethal; abnormal locomotor rhythm; flightless; lethal - all die during larval stage; lethal - all die during P-stage; decreased size; abnormal song; abnormal circadian rhythm; heat sensitive; abnormal neurophysiology; short lived; visible
FBgn0086908	egg	Others	lethal; female sterile; germline clone; increased mortality; increased cell death; decreased cell number; oogenesis; progressive; visible; abnormal locomotor behavior; short lived; increased cell number; abnormal size; decreased occurrence of cell division; non-suppressor of variegation; suppressor of variegation; adult stage; abnormal developmental rate; viable; lethal - all die before end of pu…
FBgn0015381	dsf	NHR	abnormal behavior; abnormal mating; male; abnormal courtship behavior; abnormal neuroanatomy; lethal; lethal - all die during embryonic stage; wild-type; visible; melanotic necrosis; viable; male limited
FBgn0000546	EcR	NHR	male sterile; partially lethal - majority die; lethal; recessive; pharate adult stage; lethal - all die during embryonic stage; long lived; female sterile; abnormal courtship behavior; conditional; abnormal memory; abnormal sleep; some die during embryonic stage; abnormal locomotor behavior; adult stage; increased fecundity; dominant; decreased occurrence of cell division; decreased fecundity; fe…
FBgn0000568	Eip75B	NHR	partially lethal - majority live; some die during pharate adult stage; lethal; pupal stage; some die during pupal stage; recessive; partially lethal - majority die; lethal - all die before end of second instar larval stage; abnormal developmental rate; larval stage; lethal - all die before end of larval stage; some die during larval stage; abnormal neuroanatomy; fertile; visible; viable; adult st…
FBgn0001078	ftz-f1	NHR	lethal; larval stage; embryonic stage; pair rule phenotype; non-rescuable maternal effect; some die during embryonic stage; lethal - all die during embryonic stage; abnormal developmental rate; prepupal stage; increased cell death; heat sensitive; maternal effect; recessive; wild-type; partially lethal; lethal - all die before end of pupal stage; some die during pupal stage; viable; some die duri…
FBgn0014859	Hr38	NHR	lethal; some die during immature adult stage; visible; recessive; lethal - all die before end of pupal stage; some die during pupal stage; some die during pharate adult stage; viable; heat sensitive; male limited; female limited; cold sensitive; abnormal sensory perception; abnormal pain response; third instar larval stage
FBgn0261239	Hr39	NHR	female sterile; viable; abnormal meiotic cell cycle; dominant; visible; lethal; recessive; fertile; abnormal song; abnormal neuroanatomy
FBgn0000448	Hr3	NHR	visible; some die during prepupal stage; some die during pharate adult stage; lethal; recessive; lethal - all die during embryonic stage; decreased cell number; some die during larval stage; abnormal flight; viable; increased cell death; conditional; abnormal developmental rate; increased body size; larval stage; cold sensitive; abnormal neuroanatomy
FBgn0034012	Hr51	NHR	abnormal neuroanatomy; viable; abnormal locomotor rhythm; visible; somatic clone; some die during pupal stage; adult stage; abnormal circadian rhythm
FBgn0015239	Hr78	NHR	female semi-sterile; lethal - all die before end of larval stage; some die during larval stage; wild-type; recessive; abnormal neuroanatomy; lethal; partially lethal - majority die; flightless; viable; visible
FBgn0003651	svp	NHR	lethal; recessive; abnormal planar polarity; some die during embryonic stage; abnormal cell shape; decreased cell number; decreased occurrence of cell division; lethal - all die during embryonic stage; abnormal neuroanatomy; embryonic stage; visible; heat sensitive; uncoordinated; dominant; wild-type; increased cell number; increased occurrence of cell division; abnormal neurophysiology; abnormal…
FBgn0003720	tll	NHR	lethal; abnormal neuroanatomy; some die during embryonic stage; lethal - all die during embryonic stage; recessive; increased cell death; abnormal behavior; decreased occurrence of cell division; larval stage; P-stage; decreased cell number; partially; wild-type; abnormal cell number; viable; male limited; abnormal cell cycle; increased occurrence of cell division; embryonic stage; abnormal size;…
FBgn0003964	usp	NHR	lethal; abnormal neuroanatomy; lethal - all die during P-stage; larval stage; germline clone; lethal - all die before end of larval stage; some die during larval stage; decreased cell death; pupal stage; somatic clone - Minute background; recessive; abnormal touch response; wild-type; partially; heat sensitive; flightless; embryonic stage; decreased body size; adult stage; abnormal circadian rhyt…
FBgn0003129	Poxm	Others	visible; lethal; abnormal neuroanatomy; some die during embryonic stage; lethal - all die during embryonic stage; recessive
FBgn0003130	Poxn	Others	lethal; visible; decreased cell number; abnormal size; abnormal feeding behavior; adult stage; abnormal courtship behavior; male; abnormal mating; abnormal chemosensitive behavior; viable
FBgn0005561	sv	Others	visible; recessive; dominant; lethal; increased cell death; abnormal behavior; wild-type; some die during pharate adult stage; viable; some die during embryonic stage; lethal - all die during embryonic stage; decreased cell growth; short lived; male limited; female limited; cold sensitive
FBgn0035405	CG15812	Others	abnormal neuroanatomy; viable
FBgn0003254	rib	Others	lethal; some die during embryonic stage; lethal - all die during embryonic stage; recessive; abnormal neuroanatomy; larval stage; abnormal cell polarity; viable; abnormal cell migration; embryonic stage
FBgn0260632	dl	Others	lethal; maternal effect; partially lethal - majority die; dominant; abnormal dorsal/ventral axis specification; embryonic stage; majority die during embryonic stage; some die during embryonic stage; lethal - all die during embryonic stage; visible; female sterile; heat sensitive; abnormal immune response; conditional; recessive; female sterile germline-dependent; female sterile soma-dependent; wi…
FBgn0014018	Rel	Others	lethal; recessive; abnormal immune response; short lived; conditional; viable; visible; adult stage; increased occurrence of cell division; abnormal neurophysiology; abnormal feeding behavior; abnormal starvation stress response; abnormal size; abnormal locomotor behavior; increased mortality; abnormal pain response; progressive; abnormal neuroanatomy; partially lethal - majority die; female; thi…
FBgn0020379	Rfx	Others	abnormal smell perception; abnormal taste perception; uncoordinated; lethal - all die before end of larval stage; some die during larval stage; recessive; adult stage; fertile; viable; lethal; visible; male limited; female limited; cold sensitive; abnormal cell adhesion; oogenesis
FBgn0002576	lz	Others	visible; increased cell death; abnormal eye color; abnormal smell perception; female sterile; recessive; partially lethal; male semi-sterile; male sterile; female semi-sterile; lethal; cold sensitive; female fertile; increased cell number; decreased cell death; heat sensitive; increased cell size; third instar larval stage; wild-type; dominant; viable; female; some die during pupal stage; lethal …
FBgn0003300	run	Others	lethal; recessive; abnormal cell polarity; abnormal cell adhesion; some die during embryonic stage; lethal - all die during embryonic stage; male sterile; pair rule phenotype; heat sensitive; embryonic stage; wild-type; gastrula stage; abnormal neuroanatomy; partially lethal - majority die; even pair-rule phenotype; viable
FBgn0011648	Mad	Others	visible; sterile; recessive; lethal - all die before end of pupal stage; some die during pupal stage; heat sensitive; some die during embryonic stage; maternal effect; lethal - all die during embryonic stage; lethal; wild-type; decreased body size; abnormal neuroanatomy; third instar larval stage; decreased cell number; abnormal mitotic cell cycle; cell autonomous; hyperplasia; adult stage; decre…
FBgn0011655	Med	Others	decreased occurrence of cell division; abnormal size; lethal; lethal - all die before end of larval stage; some die during larval stage; recessive; visible; viable; lethal - all die before end of pupal stage; some die during pupal stage; abnormal neuroanatomy; maternal effect; some die during embryonic stage; lethal - all die during embryonic stage; wild-type; abnormal cell growth; oogenesis; dec…
FBgn0000411	D	Others	visible; dominant; lethal; partially lethal - majority die; recessive; viable; female sterile; some die during embryonic stage; lethal - all die during embryonic stage; decreased occurrence of cell division; embryonic stage 14; abnormal neuroanatomy; embryonic stage; fertile; short lived; lethal - all die during P-stage; flightless; female limited; male limited; cold sensitive
FBgn0085432	pan	Others	visible; lethal - all die before end of larval stage; some die during larval stage; some die during embryonic stage; lethal - all die during embryonic stage; recessive; lethal; viable; wild-type; abnormal neuroanatomy; somatic clone; abnormal size; segment polarity phenotype; embryonic stage; rescuable maternal effect; increased cell number; decreased cell number; abnormal cell shape; increased o…
FBgn0039938	Sox102F	Others	viable; abnormal neuroanatomy; abnormal locomotor behavior; abnormal smell perception; third instar larval stage; visible; lethal
FBgn0005612	Sox14	Others	lethal - all die during P-stage; abnormal neuroanatomy; pupal stage; lethal; pharate adult stage; visible; cold sensitive
FBgn0005613	Sox15	Others	partially lethal - majority die; abnormal size; recessive; increased cell death; increased occurrence of cell division; hyperplasia; third instar larval stage; viable; short lived; abnormal locomotor behavior; abnormal neurophysiology; adult stage; lethal; visible; male limited; female limited; cold sensitive
FBgn0029123	SoxN	Others	abnormal neuroanatomy; some die during pupal stage; embryonic stage; decreased occurrence of cell division; decreased cell number; embryonic stage 14; lethal; visible; male limited; female limited; cold sensitive; increased cell number; embryonic stage 11; embryonic stage 16; increased occurrence of cell division
FBgn0038805	TFAM	Others	abnormal locomotor behavior; adult stage; visible; abnormal pain response; abnormal flight; abnormal circadian behavior; abnormal locomotor rhythm; majority die during pharate adult stage; short lived; male limited; lethal; cold sensitive; abnormal neuroanatomy
FBgn0016917	Stat92E	Others	female sterile; male sterile; decreased fecundity; female; lethal - all die before end of pupal stage; some die during pupal stage; lethal; abnormal mitotic cell cycle; embryonic stage; recessive; larval stage; wild-type; visible; some die during embryonic stage; embryonic/larval segmentation phenotype; decreased occurrence of cell division; first instar larval stage; abnormal immune response; le…
FBgn0261963	mid	Others	abnormal neuroanatomy; lethal; embryonic stage; some die during embryonic stage; lethal - all die during embryonic stage; recessive; short lived; decreased body size; visible; male limited; viable; abnormal cell number
FBgn0003345	sd	Others	visible; fertile; lethal; lethal - all die before end of larval stage; some die during larval stage; recessive; lethal - all die before end of pupal stage; some die during pupal stage; male sterile; female fertile; abnormal chemosensitive behavior; abnormal developmental rate; abnormal taste perception; abnormal size; wild-type; some die during pharate adult stage; abnormal stress response; incre…
FBgn0000139	ash2	Others	lethal; lethal - all die before end of pupal stage; some die during pupal stage; lethal - all die before end of larval stage; some die during larval stage; abnormal neuroanatomy; larval stage; lethal - all die before end of prepupal stage; some die during prepupal stage; recessive; pupal stage; adult stage; some die during immature adult stage; prepupal stage; heat sensitive; visible; partially l…
FBgn0032016	Mettl14	Others	fertile; viable; lethal; abnormal locomotor behavior
FBgn0000459	disco	Others	lethal; abnormal visual behavior; abnormal locomotor behavior; some die during P-stage; abnormal behavior; abnormal mating rhythm; viable; wild-type; lethal - all die during embryonic stage; fertile; partially lethal; homeotic
FBgn0266411	sima	Others	lethal; abnormal cell migration; oogenesis stage S9; oogenesis stage S10; decreased cell size; cell autonomous; recessive; abnormal locomotor behavior; adult stage; increased mortality during development; dominant; abnormal stress response; abnormal neuroanatomy; viable; visible; lethal - all die before end of P-stage
FBgn0039286	dan	Others	homeotic; adult stage; visible; somatic clone - Minute background; abnormal size; abnormal neuroanatomy; viable; lethal
FBgn0037659	Kdm2	Others	viable; partially lethal - majority die; abnormal pain response; abnormal circadian rhythm; adult stage; fertile
FBgn0011763	Dp	Others	lethal; female sterile; germline clone; decreased occurrence of cell division; non-suppressor of variegation; dominant; recessive; visible; lethal - all die before end of larval stage; some die during larval stage; lethal - all die before end of pupal stage; some die during pupal stage; decreased cell death; wandering third instar larval stage; sterile; wild-type; fertile; lethal - all die during…
FBgn0031086	fd19B	Others	abnormal neuroanatomy; visible; partially lethal; male limited; female limited; cold sensitive
FBgn0025525	bab2	Others	visible; female sterile; abnormal body color; female; dominant; male; female fertile; recessive; abnormal pain response; viable; abnormal cell number; abnormal cell migration; abnormal size; adult stage
FBgn0083981	RunxA	Others	lethal; lethal - all die during P-stage; abnormal neuroanatomy
FBgn0000179	bi	Others	visible; recessive; abnormal size; partially lethal - majority die; viable; abnormal behavior; increased size; adult stage; abnormal body color; cell autonomous; abnormal planar polarity; cell non-autonomous; lethal; lethal - all die before end of pupal stage; some die during pupal stage; some die during pharate adult stage; somatic clone; third instar larval stage; male; dominant; sterile; incre…
FBgn0016660	H15	Others	viable; fertile; abnormal neuroanatomy; lethal - all die during P-stage; some die during pupal stage
FBgn0003687	Tbp	Others	abnormal neuroanatomy; dominant; abnormal locomotor behavior; adult stage; short lived; lethal - all die before end of first instar larval stage; some die during first instar larval stage; some die during second instar larval stage; visible
FBgn0033846	mip120	Others	lethal; recessive; abnormal neuroanatomy; pharate adult stage; viable; female sterile; male sterile; abnormal size; adult stage; visible; cold sensitive
FBgn0029891	Pink1	Others	visible; abnormal locomotor behavior; abnormal neuroanatomy; abnormal smell perception; abnormal neurophysiology; abnormal flight; adult stage; increased cell death; increased mortality; decreased cell number; abnormal oxidative stress response; abnormal memory; abnormal locomotor rhythm; hyperplasia; flightless; abnormal size; female semi-sterile; fertile; dominant; viable; some die during secon…
FBgn0050077	Blos1	Others	viable; abnormal neurophysiology; abnormal neuroanatomy; abnormal learning; abnormal courtship behavior; hyperactive; wandering third instar larval stage; abnormal eye color; third instar larval stage
FBgn0031759	Kdm5	Others	abnormal locomotor behavior; lethal; enhancer of variegation; decreased cell number; decreased occurrence of cell division; abnormal meiotic cell cycle; adult stage; lethal - all die before end of pupal stage; some die during pupal stage; female; short lived; chemical sensitive; male; viable; visible; female sterile; partially lethal - majority die; female semi-sterile; abnormal developmental rat…
FBgn0261885	osa	Others	lethal; recessive; enhancer of variegation; embryonic stage; visible; dominant; non-suppressor of variegation; some die during embryonic stage; lethal - all die during embryonic stage; lethal - all die before end of pupal stage; some die during pupal stage; abnormal neuroanatomy; larval stage; increased cell death; cell autonomous; germline clone; non-rescuable maternal effect; abnormal pain resp…
FBgn0038472	CG3995	ZF	fertile; abnormal locomotor behavior; viable; visible; male limited
FBgn0000575	emc	bHLH	visible; recessive; decreased cell number; lethal; decreased occurrence of cell division; abnormal size; some die during embryonic stage; lethal - all die during embryonic stage; viable; partially lethal - majority die; male sterile; somatic clone; abnormal neuroanatomy; embryonic stage; abnormal behavior; partially lethal; adult stage
FBgn0262139	trh	bHLH	lethal; partially lethal - majority die; abnormal neuroanatomy; some die during embryonic stage; lethal - all die during embryonic stage; recessive; visible; male limited
FBgn0000228	Bsg25D	bZIP	viable; fertile; majority die during embryonic stage; abnormal locomotor behavior; abnormal size; larval stage
FBgn0039505	CG5934	bZIP	abnormal pain response; viable
FBgn0033081	geminin	bZIP	lethal; increased occurrence of cell division; visible; embryonic stage; abnormal mitotic cell cycle; decreased occurrence of cell division; increased cell death; abnormal neuroanatomy; abnormal size; P-stage; some die during P-stage
FBgn0086362	spn-F	bZIP	lethal; decreased fecundity; visible; female sterile germline-dependent; abnormal neuroanatomy; pupal stage; viable; embryonic/larval segmentation phenotype; maternal effect; adult stage
FBgn0000289	cg	ZF	visible; female sterile; hyperplasia; lethal; recessive; dominant; wild-type; abnormal neuroanatomy; fertile; viable; partially lethal; female limited
FBgn0040366	CG11398	ZF	viable; lethal; visible; female limited; abnormal neuroanatomy
FBgn0037031	CG11456	ZF	abnormal pain response; viable
FBgn0039201	DZIP1	ZF	viable; abnormal gravitaxis; uncoordinated; abnormal locomotor behavior; visible; decreased cell number; spermatogenesis
FBgn0028878	CG15269	ZF	abnormal locomotor behavior; adult stage
FBgn0030003	CG2116	ZF	viable; abnormal neuroanatomy; lethal; visible; female limited
FBgn0051441	CG31441	ZF	abnormal locomotor behavior; adult stage
FBgn0031894	CG4496	ZF	abnormal locomotor behavior; viable; visible; male limited
FBgn0029939	CG9650	ZF	lethal; recessive; abnormal pain response; viable; partially lethal - majority die; partially lethal; visible; male limited; female limited; cold sensitive
FBgn0086758	chinmo	ZF	lethal; partially lethal - majority die; recessive; abnormal size; adult stage; somatic clone - Minute background; abnormal neuroanatomy; abnormal cell shape; majority die during P-stage; increased cell number; increased occurrence of cell division; melanotic necrosis; partially lethal; larval stage; viable; visible; lethal - all die before end of larval stage; male limited; female limited; cold …
FBgn0015371	chn	ZF	lethal; recessive; some die during embryonic stage; abnormal neurophysiology; adult stage; lethal - all die during embryonic stage; visible; abnormal neuroanatomy; embryonic stage; somatic clone; viable
FBgn0045852	ham	ZF	visible; adult stage; abnormal neuroanatomy; viable; abnormal sensory perception; abnormal pain response; third instar larval stage
FBgn0034240	MESR4	ZF	increased occurrence of cell division; larval stage; viable; partially lethal - majority die; lethal; increased cell size; abnormal feeding behavior; sterile; female; lethal - all die during pupal stage; recessive
FBgn0263490	mld	ZF	abnormal memory; long lived; dominant; female limited; lethal; abnormal courtship behavior; conditional; lethal - all die before end of pupal stage; some die during pupal stage; lethal - all die before end of larval stage; some die during larval stage; abnormal sleep; chemical sensitive; adult stage; temperature conditional; fertile; some die during first instar larval stage; viable
FBgn0028999	nerfin-1	ZF	viable; abnormal neuroanatomy; larval stage; increased occurrence of cell division; neoplasia; adult stage; late embryonic stage; lethal - all die during P-stage; somatic clone; visible; decreased size
FBgn0005771	noc	ZF	visible; recessive; viable; lethal; lethal - all die before end of larval stage; some die during larval stage; abnormal behavior
FBgn0259785	pzg	ZF	abnormal neuroanatomy; flightless; partially lethal - majority die; enhancer of variegation; some die during embryonic stage; lethal - all die during embryonic stage; suppressor of variegation; dominant; lethal - all die before end of pupal stage; some die during pupal stage; lethal; melanotic mass phenotype; adult stage; visible; abnormal size; larval stage; abnormal developmental rate; decrease…
FBgn0261648	salm	ZF	partially lethal - majority die; lethal; visible; some die during embryonic stage; lethal - all die during embryonic stage; recessive; abnormal neuroanatomy; wild-type; some die during pharate adult stage; homeotic; some die during larval stage; viable; partially lethal
FBgn0000287	salr	ZF	visible; abnormal neuroanatomy; lethal; lethal - all die during larval stage
FBgn0004606	zfh1	HD	lethal; recessive; some die during embryonic stage; lethal - all die during embryonic stage; abnormal neuroanatomy; visible; wild-type; viable; abnormal sleep; adult stage; male limited
FBgn0035153	ebd1	Others	abnormal neuroanatomy; larval stage; increased cell number; adult stage; cell non-autonomous; increased occurrence of cell division; somatic clone
FBgn0287478	Camta	Others	abnormal courtship behavior; abnormal flight; abnormal song; fertile; abnormal neurophysiology; some die during pupal stage; viable; somatic clone; abnormal learning; adult stage; lethal
FBgn0036661	CG9705	Others	abnormal flight; abnormal neuroanatomy
FBgn0263352	Unr	Others	partially lethal - majority die; day 0 of adulthood; viable; abnormal pain response; lethal; male limited; third instar larval stage; some die during third instar larval stage
FBgn0263392	Tet	Others	viable; abnormal flight; majority die during P-stage; heat sensitive; fertile; abnormal neuroanatomy; larval stage
FBgn0250732	gfzf	Others	some die during pupal stage; lethal; recessive; abnormal neuroanatomy; lethal - all die during P-stage; abnormal flight; viable; adult stage; somatic clone; abnormal neurophysiology; lethal - all die during embryonic stage
FBgn0002781	mod(mdg4)	Others	enhancer of variegation; lethal; decreased fecundity; some die during larval stage; lethal - all die before end of pupal stage; recessive; some die during pupal stage; lethal - all die before end of larval stage; suppressor of variegation; non-suppressor of variegation; non-enhancer of variegation; abnormal meiotic cell cycle; homeotic; pharate adult stage; visible; male; some die during embryoni…
FBgn0052006	CG32006	Others	abnormal pain response; viable
FBgn0264954	fd3F	Others	abnormal pain response; viable; abnormal neurophysiology; abnormal auditory perception; abnormal neuroanatomy; abnormal locomotor behavior; adult stage; recessive; lethal; visible; male limited; female limited; cold sensitive
FBgn0039462	CG14252	Others	abnormal pain response; viable
FBgn0036152	Dyro	Others	partially lethal - majority die; recessive; abnormal behavior
FBgn0035721	CG9948	Others	viable; abnormal pain response
FBgn0036248	ssp	Others	abnormal neuroanatomy; viable; melanotic mass phenotype; decreased cell number; third instar larval stage
FBgn0003459	stwl	Others	male fertile; suppressor of variegation; dominant; female sterile; recessive; increased cell death; lethal; hyperplasia; increased occurrence of cell division; larval stage; chemical sensitive; abnormal neuroanatomy; pharate adult stage; viable; visible; abnormal size; oogenesis; lethal - all die before end of pupal stage; some die during pupal stage; decreased cell number; adult stage
FBgn0038016	MBD-R2	Others	abnormal neuroanatomy; lethal
FBgn0038584	mTerf5	Others	abnormal pain response; lethal
FBgn0039044	p53	Others	long lived; chemical resistant; decreased cell death; increased cell death; female; abnormal neuroanatomy; larval stage; abnormal size; visible; decreased body size; abnormal developmental rate; partially lethal - majority die; wild-type; abnormal starvation stress response; decreased cell number; adult stage; pupal stage; abnormal cell death; increased cell size; radiation sensitive; third insta…
FBgn0266129	lov	Others	abnormal courtship behavior; male limited; abnormal pain response; flightless; viable; abnormal locomotor behavior; abnormal developmental rate; abnormal body size; abnormal feeding behavior; female semi-sterile; partially lethal - majority die
FBgn0263102	psq	Others	female sterile; enhancer of variegation; recessive; some die during embryonic stage; lethal - all die during embryonic stage; maternal effect; lethal; male fertile; viable; decreased fecundity; female; heat sensitive; visible; dominant; germline clone; non-rescuable maternal effect; embryonic stage; terminal phenotype; fertile; abnormal smell perception; abnormal mitotic cell cycle; paternal effe…
FBgn0004595	pros	Others	lethal; recessive; abnormal mating; some die during embryonic stage; lethal - all die during embryonic stage; visible; abnormal neuroanatomy; adult stage; decreased cell size; embryonic stage; increased cell number; decreased cell number; larval stage; increased occurrence of cell division; neoplasia; partially lethal - majority die; lethal - all die before end of larval stage; some die during la…
FBgn0030505	NFAT	Others	abnormal neuroanatomy; visible; wild-type; viable; lethal; recessive; fertile; abnormal osmotic stress response; abnormal neurophysiology; cold sensitive
FBgn0020493	Dad	Others	FlyBase_internaltransgene_features:cell lethal:cell lethal; abnormal size; increased cell death; abnormal neuroanatomy; decreased occurrence of cell division; cell autonomous; somatic clone; increased occurrence of cell division; cell non-autonomous; adult stage; larval stage; lethal; partially lethal - majority die; visible; recessive; abnormal pain response; short lived; viable; hypoplasia
FBgn0025800	Smox	Others	partially lethal - majority die; some die during pharate adult stage; abnormal size; abnormal neuroanatomy; decreased cell number; decreased occurrence of cell division; third instar larval stage; somatic clone; visible; lethal - all die during P-stage; embryonic stage; germline clone; abnormal cell growth; decreased cell size; increased cell number; adult stage; abnormal flight; long lived; RU48…
FBgn0278608	Dsp1	Others	abnormal neuroanatomy; larval stage; abnormal flight; visible; adult stage; homeotic; abnormal locomotor behavior; semi-sterile; partially lethal; recessive; wild-type; lethal; cold sensitive
FBgn0004362	HmgD	Others	lethal; some die during P-stage; short lived; viable; abnormal learning; adult stage; some die during pupal stage
FBgn0010278	Ssrp	Others	abnormal neuroanatomy; lethal; lethal - all die during pharate adult stage; visible; male limited
FBgn0010287	Trf	Others	hyperactive; male sterile; abnormal behavior; recessive; viable
FBgn0261793	Trf2	Others	lethal; lethal - all die during P-stage; partially lethal - majority die; visible; some die during pupal stage; some die during P-stage; recessive; abnormal neuroanatomy; decreased cell size; homeotic; female sterile; lethal - all die before end of larval stage

## Sheet: TF neuro Mouse
ID	TF.name	TF.family	Phenotype
ENSMUSG00000021359	Tfap2a	Others	abnormal adrenal gland secretion; abnormal aortic arch development; abnormal aortic arch morphology; abnormal apoptosis; abnormal axial skeleton morphology; abnormal cell death; abnormal cochlear ganglion morphology; abnormal cornea morphology; abnormal cranial ganglia morphology; abnormal cranial nerve morphology; abnormal craniofacial development; abnormal cranium morphology; abnormal dorsal-ve…
ENSMUSG00000042477	Tfap2e	Others	abnormal olfactory bulb development
ENSMUSG00000019564	Arid3a	Others	abnormal embryo size; abnormal limb bud morphology; abnormal pericardium morphology; abnormal placenta morphology; decreased anxiety-related response; increased circulating HDL cholesterol level; increased circulating triglyceride level; preweaning lethality complete penetrance; abnormal B cell differentiation; abnormal cell physiology; abnormal class switch recombination; abnormal common lymphoc…
ENSMUSG00000004661	Arid3b	Others	abnormal head morphology; abnormal heart development; abnormal vascular regression; dilated heart; embryonic growth retardation; embryonic lethality during organogenesis complete penetrance; embryonic lethality complete penetrance; increased apoptosis; small pharyngeal arch; wavy neural tube
ENSMUSG00000019947	Arid5b	Others	abnormal adipose tissue morphology; abnormal adrenal gland zona reticularis morphology; abnormal cell migration; abnormal endochondral bone ossification; abnormal fat cell morphology; abnormal female reproductive system morphology; abnormal fertility/fecundity; abnormal frontal bone morphology; abnormal immune system organ morphology; abnormal kidney morphology; abnormal kidney physiology; abnorm…
ENSMUSG00000056758	Hmga2	Others	abnormal brain size; abnormal energy homeostasis; abnormal estrous cycle; abnormal postnatal growth/weight/body size; abnormal sexual interaction; abnormal spermatogonia morphology; azoospermia; brachypodia; cryptorchism; decreased birth weight; decreased body size; decreased body weight; decreased percent body fat/body weight; decreased susceptibility to diet-induced obesity; female infertility;…
ENSMUSG00000058318	Phf21a	Others	abnormal suckling behavior; neonatal lethality complete penetrance
ENSMUSG00000024548	Setbp1	Others	decreased circulating HDL cholesterol level; decreased circulating cholesterol level; decreased heart rate; decreased prepulse inhibition; hypoactivity; preweaning lethality incomplete penetrance; abnormal prepulse inhibition
ENSMUSG00000019256	Ahr	bHLH	abnormal Langerhans cell morphology; abnormal Langerhans cell physiology; abnormal atrial thrombosis; abnormal auchene hair morphology; abnormal blood vessel morphology; abnormal branching of the mammary ductal tree; abnormal cauda epididymis morphology; abnormal chemokine level; abnormal circulating hormone level; abnormal coat/ hair morphology; abnormal colon morphology; abnormal coronary arter…
ENSMUSG00000015522	Arnt	bHLH	abnormal angiogenesis; abnormal chorionic plate morphology; abnormal neural tube morphology; abnormal placenta development; abnormal placenta morphology; abnormal placenta vasculature; abnormal spongiotrophoblast layer morphology; abnormal trophoblast giant cell morphology; abnormal trophoblast layer morphology; abnormal visceral yolk sac morphology; absent placental labyrinth; absent vitelline b…
ENSMUSG00000015709	Arnt2	bHLH	abnormal cell physiology; abnormal hypothalamus morphology; abnormal neurohypophysis morphology; abnormal paraventricular hypothalamic nucleus morphology; abnormal pituitary hormone level; abnormal pituitary secretion; abnormal supraoptic nucleus morphology; enlarged third ventricle; hepatic steatosis; impaired glucose tolerance; increased body length; increased body size; increased body weight; …
ENSMUSG00000055116	Arntl	bHLH	abnormal B cell differentiation; abnormal T cell subpopulation ratio; abnormal blood coagulation; abnormal circadian behavior; abnormal circadian behavior phase; abnormal circadian regulation of heart rate; abnormal circadian regulation of systemic arterial blood pressure; abnormal circadian sleep/wake cycle; abnormal circulating adrenaline level; abnormal circulating protein level; abnormal corn…
ENSMUSG00000020052	Ascl1	bHLH	abnormal enteric neuron morphology; abnormal horizontal basal cell of olfactory epithelium morphology; abnormal locus ceruleus morphology; abnormal lung development; abnormal nervous system development; abnormal neuron apoptosis; abnormal olfactory epithelium morphology; abnormal olfactory sensory neuron morphology; abnormal parasympathetic ganglion morphology; abnormal skin pigmentation; abnorma…
ENSMUSG00000073043	Atoh1	bHLH	abnormal cerebellar Purkinje cell layer; abnormal cerebellum external granule cell layer morphology; abnormal cochlear VIII nucleus morphology; abnormal distortion product otoacoustic emission; abnormal gait; abnormal glutaminergic neuron morphology; abnormal hindbrain development; abnormal pinna reflex; absent cerebellar foliation; absent cochlear hair cells; absent vestibular hair cells; cochle…
ENSMUSG00000025128	Bhlhe22	bHLH	abnormal anterior corticospinal tract morphology; abnormal axon guidance; abnormal behavior; abnormal cerebral cortex morphology; abnormal chemical nociception; abnormal corticospinal tract morphology; abnormal motor coordination/ balance; abnormal motor neuron morphology; abnormal nervous system physiology; abnormal nervous system tract morphology; abnormal pyramidal decussation morphology; abno…
ENSMUSG00000030103	Bhlhe40	bHLH	convulsive seizures; decreased circulating HDL cholesterol level; decreased circulating calcium level; decreased circulating cholesterol level; decreased circulating glycerol level; decreased fasting circulating glucose level; decreased total body fat amount; impaired glucose tolerance; increased bone mineral content; increased bone mineral density; increased lean body mass; abnormal CD4-positive…
ENSMUSG00000029238	Clock	bHLH	abnormal basal metabolism; abnormal behavior; abnormal circadian behavior; abnormal circadian behavior persistence; abnormal circadian behavior phase; abnormal circadian regulation of heart rate; abnormal circadian regulation of systemic arterial blood pressure; abnormal circadian sleep/wake cycle; abnormal circadian temperature homeostasis; abnormal circulating protein level; abnormal eating beh…
ENSMUSG00000037335	Hand1	bHLH	abnormal amnion morphology; abnormal cardiac outflow tract development; abnormal cardiovascular system morphology; abnormal chorioallantoic fusion; abnormal chorion morphology; abnormal craniofacial morphology; abnormal embryo development; abnormal embryo implantation; abnormal embryo turning; abnormal extraembryonic endoderm formation; abnormal extraembryonic tissue morphology; abnormal heart de…
ENSMUSG00000022528	Hes1	bHLH	abnormal bile duct development; abnormal bile duct morphology; abnormal brain development; abnormal cell differentiation; abnormal cochlear hair cell morphology; abnormal common bile duct morphology; abnormal cystic duct morphology; abnormal exocrine pancreas morphology; abnormal extrahepatic bile duct morphology; abnormal inner ear vestibule morphology; abnormal intestine morphology; abnormal na…
ENSMUSG00000048001	Hes5	bHLH	abnormal Muller cell morphology; abnormal inner ear vestibule morphology; abnormal neuron morphology; abnormal utricle morphology; abnormal vestibular saccule morphology; increased cochlear inner hair cell number; increased cochlear outer hair cell number; increased vestibular hair cell number
ENSMUSG00000021109	Hif1a	bHLH	abnormal angiogenesis; abnormal blood vessel morphology; abnormal cardiac outflow tract development; abnormal cytokine level; abnormal developmental patterning; abnormal dorsal aorta morphology; abnormal embryo development; abnormal embryonic epiblast morphology; abnormal head mesenchyme morphology; abnormal heart development; abnormal heart looping; abnormal heart tube morphology; abnormal heart…
ENSMUSG00000035158	Mitf	bHLH	abnormal Harderian gland pigmentation; abnormal Langerhans cell physiology; abnormal choroid pigmentation; abnormal ciliary body morphology; abnormal ciliary process morphology; abnormal coat/hair pigmentation; abnormal cochlea morphology; abnormal cochlear hair cell morphology; abnormal epiphyseal plate morphology; abnormal estrous cycle; abnormal eye development; abnormal eye morphology; abnorm…
ENSMUSG00000047002	Msgn1	bHLH	abnormal cervical vertebrae morphology; abnormal fetal growth/weight/body size; abnormal myotome development; abnormal presomitic mesoderm morphology; absent paraxial mesoderm; absent ribs; absent tail; absent vertebrae; cervical vertebral fusion; decreased somite size; disorganized dorsal root ganglion; embryonic lethality during organogenesis complete penetrance; enlarged tail bud; incomplete c…
ENSMUSG00000022346	Myc	bHLH	abnormal bone structure; decreased body length; decreased bone mineral content; decreased bone mineral density; decreased fluid intake; decreased heart weight; decreased prepulse inhibition; increased startle reflex; preweaning lethality complete penetrance; short tibia; abnormal NK cell physiology; abnormal T cell receptor beta chain VDJ recombination; abnormal angiogenesis; abnormal chorion mor…
ENSMUSG00000037169	Mycn	bHLH	abnormal Wolffian duct morphology; abnormal angiogenesis; abnormal anterior cardinal vein morphology; abnormal apical ectodermal ridge morphology; abnormal brain morphology; abnormal cardiac epithelial to mesenchymal transition; abnormal cranial ganglia morphology; abnormal dorsal aorta morphology; abnormal embryo development; abnormal embryonic neuroepithelial layer differentiation; abnormal emb…
ENSMUSG00000026459	Myog	bHLH	abnormal laryngeal muscle morphology; abnormal lung development; abnormal muscle development; abnormal myoblast differentiation; abnormal myogenesis; abnormal reflex; abnormal rib morphology; abnormal sternebra size; abnormal sternum morphology; abnormal sternum ossification; cyanosis; decreased skeletal muscle fiber density; decreased skeletal muscle mass; edema; fragile skeleton; increased brow…
ENSMUSG00000034701	Neurod1	bHLH	abnormal Muller cell morphology; abnormal amacrine cell morphology; abnormal brain wave pattern; abnormal cerebellum morphology; abnormal dentate gyrus morphology; abnormal head movements; abnormal hippocampus CA4 region morphology; abnormal hippocampus development; abnormal hippocampus granule cell layer; abnormal hippocampus granule cell morphology; abnormal hippocampus morphology; abnormal int…
ENSMUSG00000038255	Neurod2	bHLH	abnormal behavior; abnormal locomotor behavior; decreased food intake; decreased lean body mass; decreased pulmonary respiratory rate; decreased respiratory quotient; decreased vertical activity; hyperactivity; hypoactivity; increased anxiety-related response; increased exploration in new environment; increased thigmotaxis; increased total body fat amount; abnormal adipose tissue amount; abnormal…
ENSMUSG00000048904	Neurog1	bHLH	abnormal accessory nerve morphology; abnormal cranial ganglia morphology; abnormal cranial nerve morphology; abnormal suckling behavior; abnormal superior glossopharyngeal ganglion morphology; abnormal superior vagus ganglion morphology; abnormal trigeminal nerve morphology; absent trigeminal ganglion; neonatal lethality complete penetrance
ENSMUSG00000027967	Neurog2	bHLH	abnormal autonomic nervous system morphology; abnormal cerebellum external granule cell layer morphology; abnormal dentate gyrus morphology; abnormal dorsal root ganglion morphology; abnormal facial nerve morphology; abnormal forebrain morphology; abnormal geniculate ganglion morphology; abnormal limb posture; abnormal motor neuron morphology; abnormal neuron differentiation; abnormal neuronal mi…
ENSMUSG00000051251	Nhlh1	bHLH	abnormal craniofacial morphology; decreased basophil cell number; decreased circulating chloride level; decreased exploration in new environment; enlarged lymph nodes; preweaning lethality incomplete penetrance; abnormal QT variability; abnormal basophil cell number; abnormal circulating chloride level; abnormal parasympathetic nervous system physiology; decreased heart rate variability; irregula…
ENSMUSG00000048540	Nhlh2	bHLH	abnormal behavior; abnormal bone structure; abnormal urinary bladder morphology; absent testes; decreased bone mineral content; decreased bone mineral density; decreased kidney weight; decreased lean body mass; eye hemorrhage; female infertility; impaired glucose tolerance; increased total body fat amount; male infertility; abnormal Leydig cell morphology; abnormal adipose tissue amount; abnormal…
ENSMUSG00000026077	Npas2	bHLH	abnormal heart morphology; abnormal skin morphology; decreased lymphocyte cell number; impaired contextual conditioning behavior; increased circulating alkaline phosphatase level; small heart; abnormal blood flow velocity; abnormal brain wave pattern; abnormal circulating alkaline phosphatase level; abnormal circulating protein level; abnormal contextual conditioning behavior; abnormal cued condi…
ENSMUSG00000039830	Olig2	bHLH	abnormal breathing pattern; abnormal cell differentiation; abnormal dorsal root ganglion morphology; abnormal hindbrain development; abnormal neuronal migration; abnormal posture; abnormal proprioceptive neuron morphology; abnormal reflex; abnormal sensory neuron innervation pattern; abnormal sensory neuron morphology; abnormal spinal cord interneuron morphology; abnormal spinal cord morphology; …
ENSMUSG00000045591	Olig3	bHLH	abnormal hippocampal mossy fiber morphology; abnormal inferior olivary complex morphology; abnormal neuron differentiation; abnormal neuron specification; abnormal neuronal migration; abnormal rostral migratory stream morphology; cyanosis; neonatal lethality complete penetrance; respiratory failure
ENSMUSG00000026735	Ptf1a	bHLH	abnormal cerebellar granule layer morphology; abnormal cerebellum development; abnormal eye development; abnormal glutaminergic neuron morphology; abnormal neural tube morphology; abnormal neuron differentiation; abnormal pancreas development; abnormal retina morphology; abnormal retinal outer plexiform layer morphology; abnormal spinal cord dorsal horn morphology; abnormal spleen morphology; abs…
ENSMUSG00000028717	Tal1	bHLH	abnormal blood vessel morphology; abnormal bone marrow cell morphology/development; abnormal coat appearance; abnormal ectoderm development; abnormal embryonic erythropoiesis; abnormal embryonic hematopoiesis; abnormal erythroid progenitor cell morphology; abnormal erythropoiesis; abnormal hair follicle development; abnormal hair growth; abnormal heart development; abnormal kidney morphology; abn…
ENSMUSG00000032228	Tcf12	bHLH	abnormal B cell differentiation; abnormal B cell morphology; abnormal T cell differentiation; abnormal T cell morphology; abnormal response to transplant; absent T cells; arrested T cell differentiation; decreased B cell number; decreased CD4-positive alpha beta T cell number; decreased double-positive T cell number; decreased immature B cell number; decreased pre-B cell number; decreased pro-B c…
ENSMUSG00000053477	Tcf4	bHLH	abnormal retina morphology; decreased circulating magnesium level; increased bone mineral density; increased circulating potassium level; preweaning lethality incomplete penetrance; abnormal T cell differentiation; abnormal T cell physiology; abnormal action potential; abnormal bone mineral density; abnormal brain development; abnormal brain morphology; abnormal circulating potassium level; decre…
ENSMUSG00000005718	Tfap4	bHLH	abnormal heart morphology; decreased bone mineral density; decreased circulating creatinine level; decreased circulating glucose level; decreased circulating triglyceride level; decreased total body fat amount; enlarged heart; hyperactivity; increased lean body mass; small superior vagus ganglion; abnormal T cell differentiation; abnormal bone mineral density; abnormal lean body mass; abnormal lo…
ENSMUSG00000023990	Tfeb	bHLH	abnormal auditory brainstem response; decreased bone mineral density; decreased lean body mass; decreased total body fat amount; embryonic lethality prior to tooth bud stage; increased lean body mass; increased total body fat amount; preweaning lethality complete penetrance; prolonged QT interval; trunk curl; abnormal QT interval; abnormal placenta morphology; no abnormal phenotype detected; pren…
ENSMUSG00000035799	Twist1	bHLH	abnormal bone ossification; abnormal clavicle morphology; abnormal forelimb morphology; abnormal gait; abnormal limb bone morphology; abnormal limb morphology; abnormal muscle development; abnormal osteoblast differentiation; abnormal rib morphology; cleft palate; decreased body size; embryonic lethality complete penetrance; enlarged interparietal bone; exencephaly; internal hemorrhage; neonatal …
ENSMUSG00000007805	Twist2	bHLH	abnormal testis morphology; preweaning lethality incomplete penetrance; small testis; Meibomian gland hypoplasia; abnormal brown fat cell morphology; abnormal craniofacial morphology; abnormal dermal layer morphology; abnormal eye morphology; abnormal hair follicle morphology; abnormal hair growth; abnormal head morphology; abnormal hepatocyte morphology; abnormal interleukin level; abnormal inte…
ENSMUSG00000026641	Usf1	bHLH	decreased total body fat amount; increased lean body mass; abnormal barbering behavior; abnormal circadian behavior; abnormal whisker trimming behavior; environmentally induced seizures; no abnormal phenotype detected; sporadic seizures
ENSMUSG00000058239	Usf2	bHLH	abnormal ventral coat pigmentation; absent gastric milk in neonates; decreased birth body size; decreased birth weight; decreased body size; kinked tail; postnatal lethality incomplete penetrance; premature death; reduced male fertility; sporadic seizures
ENSMUSG00000027104	Atf2	bZIP	abnormal heart morphology; abnormal kidney morphology; abnormal skin morphology; abnormal spleen morphology; abnormal testis morphology; abnormal urinary bladder morphology; decreased circulating chloride level; enlarged heart; increased circulating potassium level; preweaning lethality complete penetrance; small testis; abnormal NK cell physiology; abnormal artery development; abnormal chondrocy…
ENSMUSG00000026628	Atf3	bZIP	abnormal retina morphology; abnormal T-helper 2 physiology; abnormal pancreatic islet morphology; decreased IgG2a level; decreased metastatic potential; increased interleukin-13 secretion; increased interleukin-4 secretion; increased interleukin-5 secretion; lung inflammation
ENSMUSG00000042406	Atf4	bZIP	abnormal embryo size; abnormal heart morphology; decreased blood urea nitrogen level; decreased mean platelet volume; decreased monocyte cell number; enlarged heart; increased lymphocyte cell number; increased mean corpuscular hemoglobin; increased mean corpuscular volume; preweaning lethality complete penetrance; prolonged ST segment; abnormal bone mineralization; abnormal bone ossification; abn…
ENSMUSG00000099083	Atf7	bZIP	abnormal auditory brainstem response; decreased prepulse inhibition; increased bone mineral density; increased startle reflex; persistence of hyaloid vascular system; abnormal bone mineral density; abnormal prepulse inhibition; abnormal startle reflex; increased anxiety-related response; no abnormal phenotype detected
ENSMUSG00000040270	Bach2	bZIP	abnormal bone structure; aorta stenosis; decreased B cell number; decreased CD11b-high dendritic cell number; decreased CD8-positive naive alpha-beta T cell number; decreased bone mineral content; decreased bone mineral density; decreased cardiac stroke volume; decreased circulating creatinine level; decreased circulating glucose level; decreased circulating insulin level; decreased effector memo…
ENSMUSG00000025958	Creb1	bZIP	abnormal CNS synaptic transmission; abnormal behavioral response to addictive substance; abnormal circadian behavior phase; abnormal contextual conditioning behavior; abnormal cued conditioning behavior; abnormal lung development; abnormal lung vasculature morphology; abnormal muscle regeneration; abnormal myotube morphology; abnormal single cell response; abnormal spatial learning; abnormal stel…
ENSMUSG00000063889	Crem	bZIP	abnormal circadian behavior; abnormal contextual conditioning behavior; abnormal cued conditioning behavior; abnormal kindling response; arrest of male meiosis; arrest of spermatogenesis; decreased anxiety-related response; decreased liver regeneration; decreased testis weight; decreased ventricle muscle contractility; hyperactivity; increased anxiety-related response; male infertility; multinucl…
ENSMUSG00000059824	Dbp	bZIP	abnormal locomotor circadian rhythm; hypoactivity; shortened circadian behavior period
ENSMUSG00000025408	Ddit3	bZIP	abnormal T cell morphology; abnormal macrophage activation involved in immune response; abnormal response to injury; adipose tissue inflammation; decreased apoptosis; decreased energy expenditure; decreased fibroblast apoptosis; decreased macrophage apoptosis; decreased neuron apoptosis; decreased susceptibility to Retroviridae infection; hepatic steatosis; hypoactivity; impaired glucose toleranc…
ENSMUSG00000021250	Fos	bZIP	abnormal facial morphology; decreased lean body mass; decreased mean corpuscular hemoglobin; increased erythrocyte cell number; increased total body fat amount; preweaning lethality incomplete penetrance; shortened PR interval; abnormal bone marrow cavity morphology; abnormal compact bone morphology; abnormal compact bone thickness; abnormal cytokine secretion; abnormal erythrocyte cell number; a…
ENSMUSG00000003545	Fosb	bZIP	abnormal heart morphology; abnormal kidney morphology; abnormal skin morphology; enlarged heart; enlarged kidney; abnormal depression-related behavior; abnormal emotion/affect behavior; abnormal frequency of paradoxical sleep; abnormal learning/memory/conditioning; abnormal locomotor activation; abnormal maternal nurturing; abnormal nursing; abnormal parental behavior; abnormal pup retrieval; abn…
ENSMUSG00000052684	Jun	bZIP	abnormal allantois morphology; abnormal blood vessel morphology; abnormal craniofacial morphology; abnormal eye morphology; abnormal heart morphology; abnormal hindbrain development; abnormal limb bud morphology; abnormal limb morphology; abnormal lymph node morphology; abnormal neural tube closure; abnormal neural tube morphology; abnormal placenta morphology; abnormal placenta vasculature; abno…
ENSMUSG00000052837	Junb	bZIP	abnormal embryo size; abnormal embryo turning; abnormal forebrain development; abnormal hindbrain development; abnormal midbrain development; abnormal neural tube closure; abnormal neural tube morphology; embryonic lethality prior to tooth bud stage; preweaning lethality complete penetrance
ENSMUSG00000055435	Maf	bZIP	abnormal blood vessel morphology; abnormal liver morphology; abnormal liver size; abnormal placenta morphology; abnormal placenta vasculature; abnormal spleen morphology; abnormal tail morphology; abnormal umbilical cord morphology; decreased freezing behavior; decreased prepulse inhibition; enlarged spleen; increased startle reflex; preweaning lethality complete penetrance; small liver; abnormal…
ENSMUSG00000074622	Mafb	bZIP	abnormal bony labyrinth; abnormal brainstem morphology; abnormal breathing pattern; abnormal cell cycle; abnormal cell cycle checkpoint function; abnormal cochlear sensory epithelium morphology; abnormal endocrine pancreas development; abnormal endolymphatic duct morphology; abnormal hindbrain development; abnormal hyoid bone greater horn morphology; abnormal inner ear morphology; abnormal kidney…
ENSMUSG00000015839	Nfe2l2	bZIP	abnormal behavior; abnormal enamel morphology; abnormal erythrocyte physiology; abnormal glomerular capillary morphology; abnormal glomerular mesangium morphology; abnormal incisor color; abnormal iron homeostasis; abnormal iron level; abnormal leukocyte adhesion; abnormal liver physiology; abnormal macrophage physiology; abnormal myelin sheath morphology; abnormal neutrophil physiology; abnormal…
ENSMUSG00000056749	Nfil3	bZIP	abnormal cecum morphology; abnormal cornea morphology; abnormal pancreas morphology; abnormal spleen morphology; abnormal thymus morphology; cell and tissue damage; enlarged spleen; hyperactivity; improved glucose tolerance; inflammation; microphthalmia; small thymus; abnormal NK cell differentiation; abnormal circulating cytokine level; abnormal class switch recombination; abnormal colon goblet …
ENSMUSG00000022389	Tef	bZIP	absence seizures; seizures
ENSMUSG00000020484	Xbp1	bZIP	abnormal lens morphology; abnormal sinus arrhythmia; abnormal vertebral arch morphology; cataract; decreased circulating potassium level; decreased monocyte cell number; decreased red blood cell distribution width; impaired glucose tolerance; increased circulating free fatty acid level; increased mean corpuscular volume; increased total body fat amount; preweaning lethality complete penetrance; a…
ENSMUSG00000025105	Bnc1	ZF	abnormal coat/ hair morphology; abnormal coat/hair pigmentation; abnormal seminal vesicle morphology; abnormal spleen morphology; decreased exploration in new environment; increased lymphocyte cell number; small testis; abnormal corneal wound healing; corneal epithelium hypoplasia; decreased corneal epithelium thickness
ENSMUSG00000038418	Egr1	ZF	abnormal embryo size; abnormal forebrain development; abnormal hindbrain development; abnormal midbrain development; abnormal neural tube closure; abnormal optic disk morphology; absent seminal vesicle; decreased body length; developmental and structural abnormality; female infertility; increased grip strength; increased monocyte cell number; male infertility; preweaning lethality incomplete pene…
ENSMUSG00000037868	Egr2	ZF	abnormal Schwann cell morphology; abnormal abducens nerve morphology; abnormal aortic valve morphology; abnormal bone mineralization; abnormal bone structure; abnormal cochlear ganglion morphology; abnormal cranial ganglia morphology; abnormal cranial nerve morphology; abnormal facial nerve morphology; abnormal gait; abnormal geniculate ganglion morphology; abnormal glossopharyngeal ganglion morp…
ENSMUSG00000033730	Egr3	ZF	abnormal cholinergic neuron morphology; abnormal dorsal root ganglion morphology; abnormal excitatory postsynaptic potential; abnormal gait; abnormal limb posture; abnormal muscle spindle morphology; abnormal nervous system physiology; abnormal proprioceptive neuron morphology; abnormal somatic nervous system physiology; abnormal somatic sensory system morphology; abnormal sympathetic neuron morp…
ENSMUSG00000029275	Gfi1	ZF	abnormal NK cell differentiation; abnormal NK cell physiology; abnormal T cell differentiation; abnormal T cell proliferation; abnormal cochlear OHC efferent innervation pattern; abnormal cochlear hair cell development; abnormal cochlear hair cell morphology; abnormal cochlear inner hair cell morphology; abnormal cochlear outer hair cell morphology; abnormal cytokine secretion; abnormal definitiv…
ENSMUSG00000048402	Gli2	ZF	abnormal basioccipital bone morphology; abnormal basisphenoid bone morphology; abnormal cerebellar foliation; abnormal developmental patterning; abnormal epiphyseal plate morphology; abnormal esophageal smooth muscle morphology; abnormal esophagus development; abnormal floor plate morphology; abnormal foregut morphology; abnormal frontal bone morphology; abnormal head shape; abnormal long bone mo…
ENSMUSG00000021318	Gli3	ZF	Harderian gland hyperplasia; abnormal anterior cardinal vein morphology; abnormal axial skeleton morphology; abnormal basisphenoid bone morphology; abnormal bone mineralization; abnormal brain morphology; abnormal cerebellar Purkinje cell layer; abnormal cerebellum morphology; abnormal cerebral aqueduct morphology; abnormal cerebral cortex morphology; abnormal cerebral hemisphere morphology; abno…
ENSMUSG00000043099	Hic1	ZF	abnormal brain development; abnormal brain dura mater morphology; abnormal craniofacial development; abnormal forelimb morphology; abnormal hindlimb morphology; abnormal palate morphology; abnormal ventral body wall morphology; acrania; decreased embryo size; decreased fetal size; dermatitis; embryonic lethality during organogenesis complete penetrance; exencephaly; holoprosencephaly; increased c…
ENSMUSG00000068154	Insm1	ZF	abnormal endocrine pancreas development; abnormal endocrine pancreas morphology; abnormal enteroendocrine cell morphology; abnormal neuron differentiation; abnormal olfactory epithelium morphology; abnormal pancreatic endocrine progenitor cell physiology; abnormal pituitary gland development; absent PP cells; absent somatotrophs; absent thyrotrophs; cyanosis; decreased adrenocorticotropin level; …
ENSMUSG00000072294	Klf12	ZF	abnormal eye anterior chamber depth; decreased circulating calcium level; decreased circulating cholesterol level; decreased circulating serum albumin level; increased body length; increased cornea thickness; increased hematocrit; increased prepulse inhibition; prolonged ST segment; abnormal ST segment; abnormal body length; abnormal cornea thickness; abnormal prepulse inhibition
ENSMUSG00000029178	Klf3	ZF	abnormal aorta morphology; abnormal aortic valve morphology; abnormal blood flow velocity; abnormal blood pressure regulation; abnormal cell differentiation; abnormal epididymal fat pad morphology; abnormal gonadal fat pad morphology; abnormal heart left atrium morphology; abnormal heart left ventricle morphology; abnormal heart right atrium morphology; abnormal interventricular septum morphology…
ENSMUSG00000003032	Klf4	ZF	decreased grip strength; abnormal colon goblet cell morphology; abnormal epidermis stratum corneum morphology; abnormal epidermis stratum granulosum morphology; abnormal intestinal epithelium morphology; abnormal suckling behavior; abnormal tongue epithelium morphology; dehydration; impaired skin barrier function; neonatal lethality complete penetrance; no abnormal phenotype detected; parakeratos…
ENSMUSG00000025959	Klf7	ZF	abnormal vertebrae morphology; decreased circulating serum albumin level; hyperactivity; impaired righting response; increased kidney weight; persistence of hyaloid vascular system; preweaning lethality complete penetrance; abnormal axon extension; abnormal axon guidance; abnormal brain morphology; abnormal cerebral cortex morphology; abnormal corpus callosum morphology; abnormal dentate gyrus mo…
ENSMUSG00000033863	Klf9	ZF	abnormal heart morphology; enlarged heart; decreased circulating insulin level; impaired contextual conditioning behavior; impaired coordination
ENSMUSG00000030678	Maz	ZF	abnormal auditory brainstem response; abnormal head morphology; decreased exploration in new environment; decreased total body fat amount; increased prepulse inhibition; abnormal bladder urine volume; abnormal exploration in a new environment; abnormal heart atrium morphology; absent kidney; fetal growth retardation; lethality throughout fetal growth and development incomplete penetrance; male in…
ENSMUSG00000027684	Mecom	ZF	abnormal locomotor activation; abnormal startle reflex; decreased erythrocyte cell number; decreased hematocrit; decreased hemoglobin content; decreased prepulse inhibition; increased blood urea nitrogen level; increased circulating amylase level; increased lean body mass; increased startle reflex; increased total body fat amount; limb grasping; preweaning lethality complete penetrance; abnormal …
ENSMUSG00000028890	Mtf1	ZF	abnormal craniofacial morphology; abnormal embryo size; abnormal forebrain morphology; abnormal midbrain morphology; abnormal pericardium morphology; abnormal retina morphology; decreased circulating glucose level; decreased circulating triglyceride level; prenatal lethality prior to heart atrial septation; preweaning lethality complete penetrance; thrombocytosis; abnormal platelet cell number; e…
ENSMUSG00000022330	Osr2	ZF	abnormal eye development; abnormal eyelid fusion; abnormal lower incisor morphology; abnormal tooth development; abnormal tympanic ring morphology; cleft palate; cleft secondary palate; decreased tympanic ring size; eyelids open at birth; failure of eyelid fusion; fused synovial joints; neonatal lethality; neonatal lethality complete penetrance; no abnormal phenotype detected; palatal shelves fai…
ENSMUSG00000024922	Ovol1	ZF	abnormal coat/hair pigmentation; abnormal vibrissa morphology; decreased anxiety-related response; preweaning lethality incomplete penetrance; abnormal auchene hair morphology; abnormal awl hair morphology; abnormal hair shaft morphology; abnormal kidney morphology; abnormal skin condition; abnormal spermatogenesis; abnormal testis morphology; constricted vagina orifice; decreased body size; decr…
ENSMUSG00000037279	Ovol2	ZF	abnormal angiogenesis; abnormal aortic sac morphology; abnormal blood circulation; abnormal cephalic neural fold morphology; abnormal digestive system development; abnormal dorsal-ventral axis patterning; abnormal embryo turning; abnormal embryonic neuroepithelium morphology; abnormal embryonic tissue morphology; abnormal endocardium morphology; abnormal extraembryonic tissue morphology; abnormal…
ENSMUSG00000002265	Peg3	ZF	abnormal hypothalamus morphology; abnormal imprinting; abnormal pup retrieval; absent gastric milk in neonates; absent maternal crouching; decreased body weight; decreased oocyte number; embryonic lethality during organogenesis incomplete penetrance; increased body weight; maternal imprinting; postnatal growth retardation; postnatal lethality incomplete penetrance; small testis
ENSMUSG00000019817	Plagl1	ZF	abnormal bone ossification; abnormal caudal vertebrae morphology; abnormal heart morphology; abnormal neural tube closure; abnormal phalanx morphology; abnormal talus morphology; atelectasis; atrial septal defect; curly tail; decreased birth weight; decreased fetal weight; decreased heart weight; decreased survivor rate; maternal imprinting; muscular ventricular septal defect; neonatal lethality …
ENSMUSG00000042414	Prdm14	ZF	abnormal auditory brainstem response; abnormal bone structure; abnormal rib morphology; decreased bone mineral content; decreased bone mineral density; decreased grip strength; decreased heart rate variability; decreased lean body mass; decreased thigmotaxis; defective growth and differentiation process; developmental and structural abnormality; female infertility; hyperactivity; hypoactivity; hy…
ENSMUSG00000039410	Prdm16	ZF	abnormal choroid plexus morphology; abnormal heart morphology; abnormal heart ventricle morphology; abnormal lung morphology; abnormal mandible morphology; abnormal nasal bone morphology; abnormal palatal shelf elevation; abnormal retina morphology; abnormal snout morphology; abnormal sublingual duct morphology; abnormal sublingual gland morphology; abnormal submandibular duct morphology; abnorma…
ENSMUSG00000029913	Prdm5	ZF	abnormal auditory brainstem response; abnormal behavior; abnormal optic disk morphology; abnormal skin morphology; decreased exploration in new environment; enhanced cued conditioning behavior; hyperactivity; hypoactivity; increased circulating alkaline phosphatase level; increased thigmotaxis; prolonged PR interval; small testis; abnormal anxiety-related response; abnormal bone collagen fibril m…
ENSMUSG00000029249	Rest	ZF	abnormal auditory brainstem response; decreased heart rate; increased startle reflex; preweaning lethality complete penetrance; prolonged RR interval; abnormal RR interval; abnormal cranial flexure morphology; abnormal forebrain morphology; abnormal heart rate; abnormal kinocilium morphology; abnormal midbrain development; abnormal outer hair cell stereociliary bundle morphology; abnormal somite …
ENSMUSG00000031665	Sall1	ZF	abnormal carpal bone morphology; abnormal kidney cortex morphology; abnormal kidney development; abnormal kidney mesenchyme morphology; abnormal kidney morphology; abnormal metanephric mesenchyme morphology; abnormal olfactory bulb morphology; abnormal proximal convoluted tubule morphology; abnormal suckling behavior; abnormal ureteric bud invasion; absent carpal bone; absent kidney; absent triqu…
ENSMUSG00000027547	Sall4	ZF	abnormal anal canal morphology; abnormal anus morphology; abnormal carpal bone morphology; abnormal cell physiology; abnormal craniofacial bone morphology; abnormal developmental patterning; abnormal digit morphology; abnormal embryonic epiblast morphology; abnormal embryonic tissue morphology; abnormal gastrulation; abnormal heart development; abnormal hindlimb bud morphology; abnormal inner cel…
ENSMUSG00000001280	Sp1	ZF	abnormal embryonic tissue morphology; anophthalmia; decreased body size; decreased embryo size; decreased erythroid progenitor cell number; embryonic lethality during organogenesis complete penetrance
ENSMUSG00000018678	Sp2	ZF	abnormal embryo turning; absent fibroblast proliferation; decreased embryo size; decreased fetal size; embryonic growth retardation; embryonic lethality during organogenesis complete penetrance; fetal growth retardation; hemorrhage; lethality throughout fetal growth and development incomplete penetrance; no abnormal phenotype detected; open neural tube; postnatal lethality complete penetrance
ENSMUSG00000025323	Sp4	ZF	abnormal Purkinje fiber morphology; abnormal dentate gyrus morphology; abnormal heartbeat; abnormal hippocampus morphology; abnormal impulse conducting system conduction; abnormal locomotor behavior; abnormal spatial reference memory; abnormal startle reflex; absent heartbeat; atrioventricular block; decreased body size; decreased exploration in new environment; decreased vertical activity; delay…
ENSMUSG00000016458	Wt1	ZF	abnormal adrenal gland development; abnormal diaphragm development; abnormal embryonic tissue morphology; abnormal glomerular capillary morphology; abnormal glomerular capsule parietal layer morphology; abnormal gonadal ridge morphology; abnormal heart apex morphology; abnormal heart development; abnormal heart shape; abnormal kidney blood vessel morphology; abnormal kidney development; abnormal …
ENSMUSG00000021264	Yy1	ZF	absent egg cylinders; cyanosis; decreased birth body size; decreased cell proliferation; decreased embryo size; embryonic lethality complete penetrance; exencephaly; lethality throughout fetal growth and development incomplete penetrance; neonatal lethality complete penetrance; no abnormal phenotype detected; pallor; prenatal lethality incomplete penetrance; respiratory failure
ENSMUSG00000049672	Zbtb14	ZF	abnormal heart valve morphology; atrioventricular septal defect; double outlet right ventricle; duplex kidney; exencephaly; hydronephrosis; kidney cysts; perimembraneous ventricular septal defect
ENSMUSG00000041483	Zfp281	ZF	abnormal heart morphology; abnormal hindbrain development; abnormal neural tube closure; abnormal neural tube morphology; abnormal spleen morphology; decreased freezing behavior; decreased prepulse inhibition; preweaning lethality complete penetrance; small spleen; abnormal cell differentiation; decreased circulating insulin level; embryonic lethality between implantation and somite formation com…
ENSMUSG00000031079	Zfp300	ZF	decreased cornea thickness; increased prepulse inhibition
ENSMUSG00000051176	Zfp42	ZF	decreased anxiety-related response; decreased circulating serum albumin level; decreased thigmotaxis; hyperactivity; abnormal DNA methylation; abnormal imprinting; abnormal sperm head morphology; decreased litter size; decreased male germ cell number; decreased survivor rate; embryonic lethality incomplete penetrance; kinked sperm flagellum; oligozoospermia; prenatal lethality incomplete penetran…
ENSMUSG00000075595	Zfp652	ZF	abnormal auditory brainstem response; preweaning lethality incomplete penetrance
ENSMUSG00000032368	Zic1	ZF	abnormal cerebellar foliation; abnormal cerebellum development; abnormal cerebellum vermis morphology; abnormal gait; abnormal suckling behavior; ataxia; cerebellum hypoplasia; cerebellum vermis hypoplasia; decreased body weight; hypoactivity; hypotonia; impaired limb coordination; impaired righting response; kyphosis; neonatal lethality incomplete penetrance; postnatal growth retardation; postna…
ENSMUSG00000061524	Zic2	ZF	abnormal amygdala morphology; abnormal autopod morphology; abnormal brain development; abnormal cerebral cortex morphology; abnormal cerebral hemisphere morphology; abnormal dorsal root ganglion morphology; abnormal enteric nervous system morphology; abnormal enteric neural crest cell morphology; abnormal enteric neuron morphology; abnormal eye distance/ position; abnormal forebrain development; …
ENSMUSG00000067860	Zic3	ZF	abnormal anterior primitive streak morphology; abnormal anterior visceral endoderm morphology; abnormal axial skeleton morphology; abnormal basal ganglion morphology; abnormal cardiovascular system morphology; abnormal cerebral cortex morphology; abnormal cricoid cartilage morphology; abnormal diencephalon morphology; abnormal direction of heart looping; abnormal ear position; abnormal egg cylind…
ENSMUSG00000041703	Zic5	ZF	abnormal axon morphology; abnormal basal ganglion morphology; abnormal cerebral cortex morphology; abnormal choroid plexus morphology; abnormal cranial ganglia morphology; abnormal diencephalon morphology; abnormal folding of telencephalic vesicles; abnormal forebrain development; abnormal gait; abnormal globus pallidus morphology; abnormal glossopharyngeal ganglion morphology; abnormal hippocamp…
ENSMUSG00000023902	Zscan10	ZF	abnormal retina morphology; decreased leukocyte cell number; preweaning lethality incomplete penetrance; abnormal IgG level; abnormal T cell subpopulation ratio; abnormal heart left ventricle morphology; abnormal lens morphology; abnormal vision; cataract; decreased T cell number; decreased body temperature; decreased body weight; decreased bone mass; decreased bone mineral content; decreased cir…
ENSMUSG00000024238	Zeb1	HD	Meckel's cartilage hyperplasia; abnormal B cell differentiation; abnormal T cell differentiation; abnormal T cell subpopulation ratio; abnormal abdominal fat pad morphology; abnormal basisphenoid bone morphology; abnormal circulating hormone level; abnormal circulating lipid level; abnormal class switch recombination; abnormal cochlea morphology; abnormal cornea morphology; abnormal corneal endot…
ENSMUSG00000023994	Nfya	Others	abnormal eye morphology; abnormal head morphology; abnormal retinal pigmentation; abnormal startle reflex; decreased body length; decreased circulating serum albumin level; decreased circulating total protein level; decreased erythrocyte cell number; decreased grip strength; increased bone mineral density; increased circulating calcium level; increased circulating fructosamine level; thrombocytos…
ENSMUSG00000017007	Rbpjl	Others	head bobbing; hypoactivity; increased anxiety-related response; increased circulating amylase level; no abnormal phenotype detected
ENSMUSG00000029705	Cux1	HD	abnormal T cell differentiation; abnormal alveolocapillary membrane morphology; abnormal bone structure; abnormal coat/ hair morphology; abnormal hair follicle morphology; abnormal hair follicle orientation; abnormal hair shaft morphology; abnormal lung development; abnormal lung morphology; abnormal maternal behavior; abnormal myelopoiesis; abnormal pulmonary alveolar duct morphology; abnormal t…
ENSMUSG00000042589	Cux2	HD	abnormal cell cycle; abnormal cerebral cortex morphology; abnormal embryonic/fetal subventricular zone morphology; abnormal neocortex morphology; abnormal neural tube marginal layer morphology; abnormal neural tube morphology; abnormal neural tube ventricular layer morphology; abnormal neuronal precursor proliferation; abnormal spinal cord interneuron morphology; abnormal ventral spinal root morp…
ENSMUSG00000027490	E2f1	Others	Leydig cell hyperplasia; abnormal CD4-positive alpha beta T cell morphology; abnormal CD8-positive alpha beta T cell morphology; abnormal base-excision repair; abnormal cell cycle; abnormal cell death; abnormal circulating insulin level; abnormal cone electrophysiology; abnormal double-positive T cell morphology; abnormal double-strand DNA break repair; abnormal exocrine pancreas morphology; abno…
ENSMUSG00000014859	E2f4	Others	abnormal colon goblet cell morphology; abnormal crypts of Lieberkuhn morphology; abnormal definitive hematopoiesis; abnormal erythropoiesis; abnormal food intake; abnormal granulocyte morphology; abnormal intestinal epithelium morphology; abnormal intestinal mucosa morphology; abnormal intestine morphology; abnormal middle ear morphology; abnormal nasal cavity morphology; abnormal olfactory epith…
ENSMUSG00000027552	E2f5	Others	abnormal brain ependyma morphology; abnormal brain morphology; abnormal cerebral cortex morphology; abnormal choroid plexus morphology; abnormal nervous system morphology; abnormal neurocranium morphology; ataxia; dehydration; dilated lateral ventricles; dilated rete testis; dilated seminiferous tubules; dilated third ventricle; enlarged neurocranium; intracerebral hemorrhage; intraventricular he…
ENSMUSG00000057098	Ebf1	Others	abnormal blood vessel morphology; abnormal facial morphology; abnormal freezing behavior; decreased freezing behavior; decreased prepulse inhibition; impaired contextual conditioning behavior; increased startle reflex; preweaning lethality incomplete penetrance; abnormal B cell morphology; abnormal anterior commissure pars posterior morphology; abnormal bone marrow morphology; abnormal bone ossif…
ENSMUSG00000022053	Ebf2	Others	abnormal blood vessel morphology; abnormal facial morphology; abnormal head shape; decreased mean corpuscular volume; female infertility; preweaning lethality incomplete penetrance; shortened ST segment; abnormal bone structure; abnormal cerebellum anterior vermis morphology; abnormal cerebellum morphology; abnormal epididymis morphology; abnormal fat cell morphology; abnormal fertility/fecundity…
ENSMUSG00000009406	Elk1	Others	abnormal motor learning; increased circulating insulin level; abnormal coat appearance; asthenozoospermia; male infertility
ENSMUSG00000026436	Elk4	Others	abnormal bone structure; abnormal cornea morphology; abnormal retina morphology; corneal opacity; decreased CD4-positive alpha beta T cell number; decreased CD8-positive alpha-beta T cell number; decreased T cell number; decreased body weight; decreased circulating HDL cholesterol level; decreased circulating LDL cholesterol level; decreased circulating cholesterol level; decreased circulating fr…
ENSMUSG00000004151	Etv1	Others	abnormal dorsal root ganglion morphology; abnormal golgi tendon organ morphology; abnormal innervation pattern to muscle; abnormal muscle spindle morphology; abnormal nerve conduction; abnormal pacinian corpuscle morphology; abnormal sensory neuron innervation pattern; abnormal somatic sensory system morphology; abnormal ventral spinal root morphology; absent golgi tendon organ; ataxia; decreased…
ENSMUSG00000017724	Etv4	Others	abnormal branching of the mammary ductal tree; abnormal ejaculation; abnormal innervation pattern to muscle; abnormal motor neuron innervation pattern; abnormal motor neuron morphology; abnormal somatic sensory system morphology; absent kidney; decreased motor neuron number; decreased pacinian corpuscle number; impaired limb coordination; male infertility; renal hypoplasia; small pacinian corpusc…
ENSMUSG00000055197	Fev	Others	abnormal neuron differentiation; abnormal serotonergic neuron morphology; decreased neuron number; impaired coordination; increased aggression towards mice; increased anxiety-related response; perinatal lethality incomplete penetrance
ENSMUSG00000002111	Spi1	Others	abnormal embryo size; abnormal liver size; preweaning lethality complete penetrance; abnormal B cell differentiation; abnormal B cell number; abnormal T cell differentiation; abnormal T cell number; abnormal T cell subpopulation ratio; abnormal astrocyte morphology; abnormal blood cell morphology/development; abnormal bone marrow morphology; abnormal cell cycle; abnormal chromosome number; abnorm…
ENSMUSG00000035451	Foxa1	Others	abnormal adrenal gland secretion; abnormal branching of the mammary ductal tree; abnormal circulating insulin level; abnormal glucose homeostasis; decreased body weight; decreased circulating HDL cholesterol level; decreased circulating glucagon level; decreased circulating insulin level; decreased circulating triglyceride level; decreased insulin secretion; hypoglycemia; impaired glucose toleran…
ENSMUSG00000037025	Foxa2	Others	abnormal cell death; abnormal chordamesoderm morphology; abnormal craniofacial development; abnormal developmental patterning; abnormal embryonic tissue morphology; abnormal endoderm development; abnormal eye development; abnormal foregut morphology; abnormal gait; abnormal glucose homeostasis; abnormal metabolism; abnormal miscarriage rate; abnormal nervous system development; abnormal neural tu…
ENSMUSG00000059246	Foxb1	Others	abnormal brain morphology; abnormal cerebellum anterior vermis morphology; abnormal cerebellum morphology; abnormal gait; abnormal hypothalamus morphology; abnormal locomotor behavior; abnormal mammary gland alveolus morphology; abnormal mammary gland epithelium morphology; abnormal mammary gland lobule morphology; abnormal mammary gland morphology; abnormal mammillary body morphology; abnormal m…
ENSMUSG00000050295	Foxc1	Others	abnormal Reichert's cartilage morphology; abnormal Wolffian duct morphology; abnormal anterior eye segment morphology; abnormal aortic valve cusp morphology; abnormal aortic valve morphology; abnormal aqueous drainage system morphology; abnormal arytenoid cartilage morphology; abnormal axial skeleton morphology; abnormal basement membrane morphology; abnormal bone ossification; abnormal brain dev…
ENSMUSG00000046714	Foxc2	Others	abnormal Meckel's cartilage morphology; abnormal alisphenoid bone morphology; abnormal aortic arch morphology; abnormal basisphenoid bone morphology; abnormal blood vessel morphology; abnormal bone ossification; abnormal canal of Schlemm morphology; abnormal cartilage morphology; abnormal craniofacial bone morphology; abnormal eye morphology; abnormal fourth pharyngeal arch artery morphology; abn…
ENSMUSG00000078302	Foxd1	Others	abnormal adrenal gland morphology; abnormal forebrain morphology; abnormal kidney development; abnormal metanephric mesenchyme morphology; abnormal nephrogenic mesenchyme morphogenesis; abnormal nephrogenic zone morphology; abnormal nephron morphology; abnormal retina morphology; abnormal ureter morphology; aphagia; decreased renal glomerulus number; delayed kidney development; dilated kidney col…
ENSMUSG00000020950	Foxg1	Others	abnormal brain morphology; abnormal cerebral cortex morphology; abnormal cerebral cortex pyramidal cell morphology; abnormal cerebral hemisphere morphology; abnormal cranium morphology; abnormal embryonic/fetal subventricular zone morphology; abnormal eye morphology; abnormal nasal placode morphology; abnormal neocortex morphology; abnormal neural tube mantle layer morphology; abnormal neuron dif…
ENSMUSG00000047861	Foxi1	Others	abnormal cerebellum morphology; abnormal cochlea morphology; abnormal common crus morphology; abnormal epididymis morphology; abnormal inner ear morphology; abnormal kidney collecting duct epithelium morphology; abnormal membranous labyrinth morphology; abnormal sperm physiology; abnormal temporal bone morphology; absent cochlea; absent cochlear modiolus; absent endocochlear potential; absent inn…
ENSMUSG00000034227	Foxj1	Others	abnormal brain development; abnormal brain ependyma morphology; abnormal brain ventricle morphology; abnormal choroid plexus morphology; abnormal embryonic cilium location or orientation; abnormal left-right axis patterning; abnormal olfactory bulb development; abnormal postnatal subventricular zone morphology; abnormal primitive node morphology; abnormal stomach position or orientation; absent b…
ENSMUSG00000032998	Foxj3	Others	abnormal QT variability; abnormal coat appearance; abnormal coat/ hair morphology; abnormal embryo size; abnormal eye morphology; abnormal skin coloration; decreased bone mineral density; decreased startle reflex; decreased total body fat amount; increased bone mineral content; increased circulating alkaline phosphatase level; increased circulating calcium level; increased heart rate variability;…
ENSMUSG00000050397	Foxl2	Others	abnormal eye morphology; abnormal ovarian follicle morphology; abnormal ovary morphology; absent mature ovarian follicles; decreased body weight; decreased circulating insulin-like growth factor I level; eyelid hypoplasia; eyelids open at birth; female infertility; impaired ovarian folliculogenesis; no abnormal phenotype detected; postnatal lethality; postnatal lethality incomplete penetrance; re…
ENSMUSG00000002057	Foxn1	Others	abnormal seminal vesicle morphology; abnormal skin morphology; abnormal thymus morphology; athymia; decreased lean body mass; hydrometra; increased total body fat amount; preweaning lethality incomplete penetrance; small superior vagus ganglion; abnormal CD4-positive alpha beta T cell morphology; abnormal CD8-positive alpha beta T cell morphology; abnormal Peyer's patch germinal center morphology…
ENSMUSG00000042002	Foxn4	Others	abnormal retinal ganglion cell morphology; abnormal retinal neuronal layer morphology; absent horizontal cells; decreased amacrine cell number; increased retinal apoptosis; increased retinal photoreceptor cell number; postnatal lethality incomplete penetrance; retina hypoplasia
ENSMUSG00000044167	Foxo1	Others	abnormal chorioallantoic fusion; abnormal embryo size; abnormal forebrain development; abnormal heart morphology; abnormal hindbrain development; abnormal midbrain development; abnormal neural tube closure; abnormal pharyngeal arch morphology; abnormal somite shape; preweaning lethality complete penetrance; abnormal adipose tissue physiology; abnormal blood vessel morphology; abnormal dorsal aort…
ENSMUSG00000048756	Foxo3	Others	abnormal auditory brainstem response; abnormal retina morphology; abnormal sleep behavior; decreased bone mineral density; decreased exploration in new environment; decreased prepulse inhibition; decreased startle reflex; decreased total body fat amount; decreased vertical activity; hypoactivity; increased prepulse inhibition; increased thigmotaxis; prolonged QRS complex duration; sclerocornea; a…
ENSMUSG00000042903	Foxo4	Others	decreased prepulse inhibition; increased circulating cholesterol level; male infertility; prolonged QRS complex duration; no abnormal phenotype detected
ENSMUSG00000052135	Foxo6	Others	abnormal Kupffer cell morphology; abnormal brain wave pattern; abnormal dendritic spine morphology; abnormal enzyme/coenzyme activity; abnormal gluconeogenesis; abnormal long term object recognition memory; abnormal temporal memory; decreased circulating cholesterol level; decreased circulating glucose level; decreased circulating insulin level; decreased fasting circulating glucose level; decrea…
ENSMUSG00000029563	Foxp2	Others	decreased circulating phosphate level; increased body weight; abnormal Purkinje cell dendrite morphology; abnormal cardiovascular system physiology; abnormal cerebellar Purkinje cell layer; abnormal cerebellar foliation; abnormal cerebellum external granule cell layer morphology; abnormal cerebellum morphology; abnormal circulating mineral level; abnormal dendrite morphology; abnormal eating beha…
ENSMUSG00000038415	Foxq1	Others	abnormal brain development; abnormal coat appearance; abnormal hair cortex morphology; abnormal hair growth; abnormal hair medulla; abnormal hair shaft morphology; abnormal hair texture; abnormal head morphology; abnormal lymphocyte cell number; abnormal response/metabolism to endogenous compounds; decreased digestive secretion; embryonic lethality during organogenesis incomplete penetrance; impa…
ENSMUSG00000015053	Gata2	Others	abnormal auditory brainstem response; abnormal chorioallantoic fusion; abnormal embryo size; abnormal epididymis morphology; abnormal forebrain development; abnormal hindbrain development; abnormal kidney morphology; abnormal midbrain development; abnormal neural tube closure; abnormal ovary morphology; absent epididymis; embryonic lethality prior to tooth bud stage; enlarged epididymis; increase…
ENSMUSG00000015619	Gata3	Others	abnormal T cell differentiation; abnormal T cell number; abnormal Wolffian duct morphology; abnormal axon guidance; abnormal blood coagulation; abnormal brain morphology; abnormal cardiovascular system physiology; abnormal cochlear outer hair cell morphology; abnormal cochlear sensory epithelium morphology; abnormal craniofacial bone morphology; abnormal definitive hematopoiesis; abnormal double-…
ENSMUSG00000021944	Gata4	Others	abnormal Sertoli cell morphology; abnormal cardiovascular system morphology; abnormal conotruncal ridge morphology; abnormal developmental patterning; abnormal diaphragm central tendon morphology; abnormal dorsal-ventral axis patterning; abnormal extraembryonic coelom morphology; abnormal fetal Leydig cell differentiation; abnormal fetal cardiomyocyte proliferation; abnormal foregut morphology; a…
ENSMUSG00000023333	Gcm1	Others	abnormal chorionic plate morphology; abnormal extraembryonic tissue morphology; abnormal neuron differentiation; abnormal placenta fetal blood space morphology; abnormal placenta labyrinth morphology; abnormal placental labyrinth vasculature morphology; abnormal syncytiotrophoblast morphology; absent placental labyrinth; decreased embryo size; embryo tissue necrosis; embryonic lethality during or…
ENSMUSG00000022286	Grhl2	Others	abnormal abdominal wall morphology; abnormal blood vessel morphology; abnormal craniofacial morphology; abnormal forebrain development; abnormal head shape; abnormal heart morphology; abnormal hindbrain development; abnormal limb bud morphology; abnormal limb morphology; abnormal midbrain development; abnormal neural tube closure; abnormal neural tube morphology; abnormal optic vesicle formation;…
ENSMUSG00000036602	Alx1	HD	abnormal forebrain morphology; abnormal nasal capsule morphology; abnormal palatine bone morphology; abnormal pectoral girdle bone morphology; absent gastric milk in neonates; absent interparietal bone; absent neurocranium; absent presphenoid bone; acrania; cyanosis; decreased cranium length; eyelids open at birth; increased embryonic neuroepithelium thickness; meroanencephaly; neonatal lethality…
ENSMUSG00000014603	Alx3	HD	abnormal cell death; abnormal craniofacial development; abnormal embryonic neuroepithelium morphology; abnormal head mesenchyme morphology; abnormal pancreatic beta cell physiology; decreased insulin secretion; decreased pancreatic beta cell mass; embryonic growth retardation; exencephaly; failure of eyelid fusion; impaired glucose tolerance; increased circulating glucose level; increased circula…
ENSMUSG00000035277	Arx	HD	abnormal associative learning; abnormal brain internal capsule morphology; abnormal brain interneuron morphology; abnormal brain wave pattern; abnormal central medial nucleus morphology; abnormal cerebral cortex morphology; abnormal cholinergic neuron morphology; abnormal corpus callosum morphology; abnormal cortical marginal zone morphology; abnormal cortical plate morphology; abnormal cortical …
ENSMUSG00000026805	Barhl1	HD	increased blood urea nitrogen level; cochlear inner hair cell degeneration; cochlear outer hair cell degeneration; deafness; decreased startle reflex; increased or absent threshold for auditory brainstem response; increased susceptibility to age-related hearing loss
ENSMUSG00000034384	Barhl2	HD	abnormal eye development; abnormal eye electrophysiology; abnormal optic nerve morphology; abnormal retinal ganglion layer morphology; abnormal retinal inner nuclear layer morphology; decreased amacrine cell number; decreased retinal ganglion cell number; impaired coordination; increased amacrine cell number; postnatal lethality complete penetrance; slow postnatal weight gain; thin retinal gangli…
ENSMUSG00000032033	Barx2	HD	abnormal coat/hair pigmentation; abnormal cornea morphology; abnormal eye morphology; abnormal eyelid morphology; abnormal gait; abnormal tail morphology; abnormal vertebrae morphology; absent vibrissae; corneal opacity; corneal vascularization; eyelids fail to open; narrow eye opening; preweaning lethality incomplete penetrance; abnormal hair cycle; abnormal motor capabilities/coordination/movem…
ENSMUSG00000041578	Crx	HD	abnormal heart morphology; abnormal seminal vesicle morphology; abnormal skin morphology; abnormal testis morphology; abnormal thymus morphology; abnormal urinary bladder morphology; enlarged heart; enlarged thymus; enlarged urinary bladder; increased fasting circulating glucose level; increased heart rate; shortened RR interval; small testis; small thymus; abnormal blood circulation; abnormal ci…
ENSMUSG00000030507	Dbx1	HD	abnormal GABAergic neuron morphology; abnormal medulla oblongata morphology; abnormal pre-Botzinger complex morphology; abnormal pre-Botzinger complex physiology; abnormal somatic nervous system physiology; abnormal spinal cord interneuron morphology; cyanosis; neonatal lethality complete penetrance; no abnormal phenotype detected; respiratory failure
ENSMUSG00000041911	Dlx1	HD	abnormal facial nerve morphology; abnormal stapes morphology; absent stapedial artery; absent stapes obturator foramen; cleft palate; conductive hearing loss; decreased body size; increased or absent threshold for auditory brainstem response; premature death; small stapes
ENSMUSG00000023391	Dlx2	HD	abnormal alisphenoid bone morphology; abnormal basisphenoid bone morphology; abnormal cranium morphology; abnormal facial nerve morphology; abnormal incudostapedial joint morphology; abnormal incus morphology; abnormal locomotor activation; abnormal mandibular nerve branching; abnormal maxilla morphology; abnormal olfactory bulb development; abnormal palatine bone morphology; abnormal pterygoid b…
ENSMUSG00000001510	Dlx3	HD	abnormal allantois morphology; abnormal chorioallantoic fusion; abnormal craniofacial morphology; abnormal ear morphology; abnormal head shape; abnormal heart morphology; abnormal hindbrain development; abnormal neural tube closure; abnormal neural tube morphology; abnormal pericardium morphology; abnormal somite shape; increased circulating alkaline phosphatase level; preweaning lethality comple…
ENSMUSG00000029755	Dlx5	HD	Wormian bones; abnormal GABAergic neuron morphology; abnormal Meckel's cartilage morphology; abnormal alisphenoid bone morphology; abnormal axon extension; abnormal basicranium morphology; abnormal basioccipital bone morphology; abnormal basisphenoid bone morphology; abnormal bone ossification; abnormal brain development; abnormal cell proliferation; abnormal cochlea morphology; abnormal craniofa…
ENSMUSG00000043969	Emx2	HD	Wolffian duct degeneration; abnormal Ammon gyrus morphology; abnormal cerebral cortex morphology; abnormal cerebral hemisphere morphology; abnormal cochlea morphology; abnormal cochlear inner hair cell morphology; abnormal hippocampal fimbria morphology; abnormal incudomalleolar joint morphology; abnormal incudostapedial joint morphology; abnormal incus long process morphology; abnormal incus mor…
ENSMUSG00000058665	En1	HD	abnormal CNS synaptic transmission; abnormal apical ectodermal ridge morphology; abnormal autopod morphology; abnormal axial skeleton morphology; abnormal axon guidance; abnormal brain commissure morphology; abnormal brain development; abnormal brain morphology; abnormal brain vasculature morphology; abnormal cell cycle; abnormal cell migration; abnormal cerebellar lobule formation; abnormal cere…
ENSMUSG00000039095	En2	HD	abnormal behavior; abnormal cerebellar foliation; abnormal cerebellar granule layer morphology; abnormal cerebellum development; abnormal cerebellum hemisphere lobule morphology; abnormal cerebellum morphology; abnormal cerebellum posterior vermis morphology; abnormal cerebellum vermis lobule morphology; abnormal cerebellum vermis morphology; abnormal grip strength; abnormal grooming behavior; ab…
ENSMUSG00000005503	Evx1	HD	abnormal embryonic tissue morphology; abnormal spinal cord interneuron morphology; absent trophectoderm; embryonic lethality before implantation complete penetrance
ENSMUSG00000067724	Gbx1	HD	abnormal behavior; abnormal gait; abnormal optic disk morphology; abnormal retinal blood vessel morphology; abnormal retinal vasculature morphology; decreased circulating phosphate level; decreased exploration in new environment; enlarged urinary bladder; hyperactivity; hypoactivity; improved glucose tolerance; increased anxiety-related response; increased circulating glucose level; increased thi…
ENSMUSG00000034486	Gbx2	HD	abnormal aortic arch morphology; abnormal cardiovascular system morphology; abnormal cerebellum development; abnormal cerebellum morphology; abnormal choroid plexus morphology; abnormal cochlear ganglion morphology; abnormal cochlear sensory epithelium morphology; abnormal crista ampullaris morphology; abnormal forebrain development; abnormal fourth pharyngeal arch artery morphology; abnormal hin…
ENSMUSG00000021095	Gsc	HD	abnormal Meckel's cartilage morphology; abnormal acetabulum morphology; abnormal alisphenoid bone morphology; abnormal basicranium morphology; abnormal breathing pattern; abnormal craniofacial morphology; abnormal epitympanic recess morphology; abnormal ethmoid bone morphology; abnormal external auditory canal morphology; abnormal extrinsic tongue muscle morphology; abnormal femur head morphology…
ENSMUSG00000035946	Gsx2	HD	abnormal area postrema morphology; abnormal brain development; abnormal brain interneuron morphology; abnormal forebrain development; abnormal fourth ventricle morphology; abnormal hindbrain development; abnormal lateral ganglionic eminence morphology; abnormal neuron differentiation; abnormal olfactory sensory neuron morphology; abnormal telencephalon development; abnormal telencephalon morpholo…
ENSMUSG00000039377	Hlx	HD	abnormal diaphragm morphology; abnormal enteric neuron morphology; abnormal erythropoiesis; abnormal intestine morphology; abnormal liver bud morphology; abnormal liver development; absent gallbladder; anemia; decreased circulating serum albumin level; decreased fetal size; diaphragmatic hernia; enlarged lung; hydrops fetalis; impaired hematopoiesis; liver hypoplasia; pallor; perinatal lethality …
ENSMUSG00000067438	Hmx1	HD	abnormal ear position; abnormal retrotympanic process morphology; decreased body size; decreased body weight; enlarged gonial bone; exencephaly; gonial bone hyperplasia; lowered ear position; microphthalmia; neonatal lethality incomplete penetrance; perinatal lethality incomplete penetrance
ENSMUSG00000050100	Hmx2	HD	abnormal auditory brainstem response; abnormal kidney morphology; atrophy; decreased basophil cell number; decreased circulating insulin level; enlarged kidney; hydronephrosis; increased bone mineral content; increased hemoglobin content; intracellular and extracellular accumulation; polycystic kidney; abnormal bone mineralization; abnormal crista ampullaris morphology; abnormal ear development; …
ENSMUSG00000029844	Hoxa1	HD	abnormal aortic arch morphology; abnormal basioccipital bone morphology; abnormal cardiac outflow tract development; abnormal cardiovascular system morphology; abnormal cochlea morphology; abnormal cochlear sensory epithelium morphology; abnormal cranial ganglia morphology; abnormal cranial nerve morphology; abnormal cranial neural crest cell migration; abnormal crista ampullaris morphology; abno…
ENSMUSG00000000938	Hoxa10	HD	abnormal heart morphology; decreased circulating triglyceride level; enlarged heart; improved glucose tolerance; increased bone mineral content; abnormal Sertoli cell morphology; abnormal axial skeleton morphology; abnormal bone mineralization; abnormal gubernaculum morphology; abnormal prostate gland anterior lobe morphology; abnormal seminal vesicle development; abnormal spermatogenesis; abnorm…
ENSMUSG00000014704	Hoxa2	HD	abnormal auditory brainstem response; abnormal gait; abnormal snout morphology; decreased cardiac output; decreased cardiac stroke volume; decreased food intake; decreased prepulse inhibition; decreased respiratory quotient; preweaning lethality complete penetrance; abnormal Meckel's cartilage morphology; abnormal basioccipital bone morphology; abnormal basisphenoid bone morphology; abnormal beha…
ENSMUSG00000079560	Hoxa3	HD	abnormal cardiovascular system morphology; abnormal cervical vertebrae morphology; abnormal clavicle morphology; abnormal cricoid cartilage morphology; abnormal epiglottis morphology; abnormal facial morphology; abnormal fourth pharyngeal arch morphology; abnormal glossopharyngeal nerve morphology; abnormal heart size; abnormal hyoid bone greater horn morphology; abnormal hyoid bone lesser horn m…
ENSMUSG00000049604	Hoxb13	HD	preweaning lethality incomplete penetrance; abnormal caudal vertebrae morphology; abnormal dorsal root ganglion morphology; abnormal innervation; abnormal nervous system tract morphology; abnormal neural tube morphology; abnormal neuron differentiation; abnormal prostate gland physiology; abnormal prostate gland ventral lobe morphology; abnormal spinal cord morphology; abnormal tail morphology; a…
ENSMUSG00000048763	Hoxb3	HD	fusion of atlas and odontoid process; fusion of glossopharyngeal and vagus nerve; neonatal lethality incomplete penetrance
ENSMUSG00000038700	Hoxb5	HD	abnormal pectoral girdle bone morphology; abnormal scapula morphology; abnormal somatic nervous system morphology; abnormal thoracic vertebrae morphology; abnormal vertebrae morphology; cervical vertebral transformation; thoracic vertebral transformation
ENSMUSG00000000690	Hoxb6	HD	abnormal definitive hematopoiesis; abnormal erythropoiesis; abnormal rib morphology; abnormal somatic nervous system morphology; abnormal thoracic vertebrae morphology; abnormal vertebrae morphology; absent proximal rib; cervical vertebral transformation; decreased rib number; rib bifurcation; thoracic vertebral transformation; vertebral transformation
ENSMUSG00000056648	Hoxb8	HD	abnormal coat appearance; abnormal dorsal root ganglion morphology; abnormal gait; abnormal grooming behavior; abnormal microglial cell morphology; abnormal rib development; abnormal rib morphology; abnormal skin condition; abnormal sleep pattern; abnormal spinal cord dorsal horn morphology; abnormal spinal nerve morphology; abnormal sternocostal joint morphology; abnormal sternum morphology; abn…
ENSMUSG00000022484	Hoxc10	HD	abnormal acetabulum morphology; abnormal bone mineralization; abnormal femur morphology; abnormal hyaline cartilage morphology; abnormal iliofemoral ligament morphology; abnormal ischiofemoral ligament morphology; abnormal pelvic girdle bone morphology; abnormal trochanter morphology; caudal vertebral transformation; decreased motor neuron number; decreased rib number; decreased skeletal muscle s…
ENSMUSG00000042448	Hoxd1	HD	abnormal cervical atlas morphology; abnormal cervical vertebrae morphology; abnormal nociception after inflammation; abnormal sensory neuron innervation pattern; absent arcus anterior; absent odontoid process; cervical vertebral fusion; fusion of atlas and occipital bones; increased thermal nociceptive threshold
ENSMUSG00000050368	Hoxd10	HD	abnormal gait; abnormal joint morphology; abnormal male reproductive system physiology; abnormal patella morphology; abnormal sacral vertebrae morphology; abnormal spinal nerve morphology; abnormal stationary movement; abnormal vertebral transverse process morphology; sacral vertebral fusion
ENSMUSG00000079277	Hoxd3	HD	abnormal arcus anterior morphology; abnormal cervical atlas morphology; abnormal cervical axis morphology; abnormal cervical vertebrae morphology; abnormal odontoid process morphology; abnormal spinal nerve morphology; abnormal vertebral artery morphology; absent arcus anterior; absent odontoid process; asymmetric sternocostal joints; fusion of atlas and occipital bones; fusion of atlas and odont…
ENSMUSG00000031737	Irx5	HD	abnormal retinal cone bipolar cell morphology; decreased body size; narrow eye opening
ENSMUSG00000031738	Irx6	HD	abnormal coat/hair pigmentation; abnormal eye morphology; abnormal liver morphology; abnormal seminal vesicle morphology; abnormal skin coloration; increased body weight; abnormal cone electrophysiology; abnormal retinal bipolar cell morphology; abnormal retinal inner plexiform layer morphology; abnormal rod electrophysiology
ENSMUSG00000042258	Isl1	HD	abnormal Rathke's pouch development; abnormal auditory bulla morphology; abnormal dorsal aorta morphology; abnormal heart atrium morphology; abnormal heart development; abnormal heart shape; abnormal malleus morphology; abnormal motor neuron morphology; abnormal pancreas mesenchyme morphology; abnormal pancreas morphology; abnormal pancreatic acinar cell morphology; abnormal pancreatic islet morp…
ENSMUSG00000032318	Isl2	HD	abnormal axon morphology; abnormal innervation; abnormal motor neuron innervation pattern; abnormal motor neuron morphology; abnormal neuron specification; distended abdomen; neonatal lethality complete penetrance; no abnormal phenotype detected; respiratory failure
ENSMUSG00000018698	Lhx1	HD	decreased circulating alkaline phosphatase level; abnormal allantois morphology; abnormal anterior head development; abnormal brain development; abnormal egg cylinder morphology; abnormal female reproductive system morphology; abnormal gastrulation movements; abnormal hindbrain development; abnormal male reproductive system morphology; abnormal neural tube morphology; abnormal primitive node morp…
ENSMUSG00000000247	Lhx2	HD	abnormal basal ganglion morphology; abnormal cerebral cortex morphology; abnormal cortical plate morphology; abnormal erythropoiesis; abnormal eye development; abnormal neocortex morphology; abnormal olfactory bulb morphology; abnormal optic vesicle formation; abnormal telencephalon morphology; absent hippocampus; absent optic placodes; absent retina; anemia; anophthalmia; aphakia; decreased eryt…
ENSMUSG00000026934	Lhx3	HD	abnormal Rathke's pouch apoptosis; abnormal Rathke's pouch development; abnormal corticotroph morphology; abnormal craniofacial morphology; abnormal fertility/fecundity; abnormal internal male genitalia morphology; abnormal pituitary gland development; abnormal pituitary gland morphology; abnormal pituitary hormone level; abnormal sex gland secretion; abnormal spermatogenesis; abnormal thyroid fo…
ENSMUSG00000029595	Lhx5	HD	abnormal Ammon gyrus morphology; abnormal axon guidance; abnormal hippocampus development; abnormal neuronal migration; abnormal neuronal precursor proliferation; absent choroid plexus; absent dentate gyrus; absent hippocampal commissure; absent hippocampal fimbria; cyanosis; postnatal lethality complete penetrance
ENSMUSG00000026890	Lhx6	HD	decreased vertical activity; hypoactivity; increased circulating cholesterol level; increased total body fat amount; preweaning lethality incomplete penetrance; abnormal adipose tissue amount; abnormal brain interneuron morphology; abnormal cerebral cortex morphology; abnormal hippocampus morphology; abnormal inhibitory postsynaptic currents; abnormal locomotor activation; abnormal miniature inhi…
ENSMUSG00000096225	Lhx8	HD	abnormal cholinergic neuron morphology; abnormal contextual conditioning behavior; abnormal dorsal striatum morphology; abnormal spatial learning; abnormal telencephalon development; cleft palate; cleft secondary palate; decreased body weight; neonatal lethality incomplete penetrance; palatal shelves fail to meet at midline; premature death; preweaning lethality incomplete penetrance
ENSMUSG00000026686	Lmx1a	HD	abnormal bony labyrinth; abnormal cell migration; abnormal cell physiology; abnormal cell proliferation; abnormal cerebellar foliation; abnormal cerebellum development; abnormal cerebellum morphology; abnormal cerebellum posterior vermis morphology; abnormal cochlea morphology; abnormal cochlear inner hair cell morphology; abnormal cochlear labyrinth morphology; abnormal ear development; abnormal…
ENSMUSG00000038765	Lmx1b	HD	abnormal Descemet membrane; abnormal anterior eye segment morphology; abnormal brain development; abnormal cartilage development; abnormal cerebellum morphology; abnormal cerebral cortex morphology; abnormal ciliary body morphology; abnormal clavicle morphology; abnormal cornea morphology; abnormal corneal endothelium morphology; abnormal corneal stroma morphology; abnormal cranial suture morphol…
ENSMUSG00000020160	Meis1	HD	abnormal QT variability; abnormal sinus arrhythmia; decreased prepulse inhibition; hyperactivity; increased bone mineral content; increased bone mineral density; increased startle reflex; preweaning lethality complete penetrance; abnormal angiogenesis; abnormal blood vessel morphology; abnormal bone mineral density; abnormal bone mineralization; abnormal brain morphology; abnormal capillary branc…
ENSMUSG00000027210	Meis2	HD	abnormal cornea morphology; abnormal eyelid morphology; abnormal facial nerve morphology; abnormal liver morphology; abnormal trigeminal nerve morphology; abnormal vestibulocochlear nerve morphology; absent heart valves; absent trigeminal ganglion; anemia; decreased fetal size; embryonic growth retardation; hemorrhage; increased embryonic tissue cell apoptosis; increased hepatocyte apoptosis; let…
ENSMUSG00000026497	Mixl1	HD	abnormal amnion morphology; abnormal anterior primitive streak morphology; abnormal embryo development; abnormal embryonic tissue morphology; abnormal foregut morphology; abnormal head mesenchyme morphology; abnormal neural fold elevation formation; abnormal neural fold formation; abnormal neural fold morphology; abnormal notochord morphology; abnormal primitive streak morphology; abnormal rostra…
ENSMUSG00000001566	Mnx1	HD	abnormal axon guidance; abnormal axon morphology; abnormal duodenum morphology; abnormal hypoglossal nerve morphology; abnormal innervation; abnormal motor neuron morphology; abnormal neuromuscular synapse morphology; abnormal pancreas development; abnormal pancreatic beta cell physiology; abnormal pancreatic delta cell morphology; abnormal pancreatic islet morphology; decreased fetal size; decre…
ENSMUSG00000048450	Msx1	HD	abnormal embryo size; abnormal facial morphology; decreased thigmotaxis; limb grasping; preweaning lethality complete penetrance; abnormal brain commissure morphology; abnormal brain morphology; abnormal breathing pattern; abnormal cranium morphology; abnormal diencephalon morphology; abnormal embryonic tissue morphology; abnormal epitympanic recess morphology; abnormal eye morphology; abnormal f…
ENSMUSG00000021469	Msx2	HD	abnormal appendicular skeleton morphology; abnormal axial skeleton morphology; abnormal bone ossification; abnormal cerebellum anterior vermis morphology; abnormal cerebellum development; abnormal cornea morphology; abnormal enamel organ morphology; abnormal eye development; abnormal eye morphology; abnormal frontal bone morphology; abnormal hair shedding; abnormal lens morphology; abnormal lens …
ENSMUSG00000001496	Nkx2-1	HD	abnormal Leydig cell morphology; abnormal Rathke's pouch apoptosis; abnormal Rathke's pouch development; abnormal adenohypophysis development; abnormal adrenal cortex morphology; abnormal branching involved in lung morphogenesis; abnormal bronchus epithelium morphology; abnormal bronchus morphology; abnormal diencephalon morphology; abnormal forebrain morphology; abnormal foregut morphology; abno…
ENSMUSG00000027434	Nkx2-2	HD	abnormal nervous system morphology; abnormal neuron specification; abnormal oligodendrocyte morphology; abnormal pancreas morphology; abnormal pancreas physiology; abnormal pancreatic beta cell differentiation; abnormal pancreatic islet morphology; abnormal serotonergic neuron morphology; absent oligodendrocytes; absent pancreatic beta cells; decreased PP cell number; decreased glucagon secretion…
ENSMUSG00000015579	Nkx2-5	HD	Ebstein's malformation of tricuspid valve; abnormal PR interval; abnormal Purkinje fiber morphology; abnormal QRS complex; abnormal ST segment; abnormal aortic valve morphology; abnormal atrioventricular node conduction; abnormal atrioventricular node morphology; abnormal cardiac outflow tract development; abnormal dorsal aorta morphology; abnormal embryonic hematopoiesis; abnormal embryonic tiss…
ENSMUSG00000058669	Nkx2-9	HD	abnormal accessory nerve morphology; abnormal axon guidance; abnormal bronchus epithelium morphology; abnormal motor neuron innervation pattern; abnormal motor neuron morphology; abnormal respiratory epithelium morphology; abnormal vagus nerve morphology; absent neuronal precursor cells; bronchial epithelial hyperplasia; fusion of glossopharyngeal and vagus nerve; increased lung adenoma incidence…
ENSMUSG00000035187	Nkx6-1	HD	abnormal motor capabilities/coordination/movement; abnormal neuron specification; abnormal spinal cord interneuron morphology; decreased insulin secretion; decreased motor neuron number; decreased pancreatic beta cell number; forelimb paralysis; neonatal lethality complete penetrance; small pancreatic islets
ENSMUSG00000068302	Noto	HD	abnormal blood vessel morphology; abnormal dorsal root ganglion morphology; abnormal embryonic cilium location or orientation; abnormal floor plate morphology; abnormal left-right axis patterning; abnormal motile primary cilium morphology; abnormal motile primary cilium physiology; abnormal primitive node morphology; abnormal sclerotome morphology; abnormal somite development; abnormal tail morph…
ENSMUSG00000021685	Otp	HD	decreased eosinophil cell number; increased circulating iron level; preweaning lethality complete penetrance; abnormal circulating iron level; abnormal diencephalon morphology; abnormal dopaminergic neuron morphology; abnormal energy homeostasis; abnormal fat pad morphology; abnormal hypothalamus morphology; abnormal hypothalamus physiology; abnormal neurohypophysis median eminence morphology; ab…
ENSMUSG00000005917	Otx1	HD	abnormal cartilage morphology; abnormal cerebellar foliation; abnormal cerebral cortex morphology; abnormal cranium morphology; abnormal eye anterior chamber morphology; abnormal eye morphology; abnormal inner ear morphology; abnormal iris morphology; abnormal lens morphology; abnormal midbrain morphology; abnormal nervous system morphology; abnormal orbitosphenoid bone morphology; abnormal ovari…
ENSMUSG00000021848	Otx2	HD	abnormal Meckel's cartilage morphology; abnormal adenohypophysis morphology; abnormal alisphenoid bone morphology; abnormal allantois morphology; abnormal amnion morphology; abnormal anterior eye segment morphology; abnormal anterior head development; abnormal axial mesoderm morphology; abnormal basisphenoid bone morphology; abnormal brain development; abnormal cephalic neural fold morphology; ab…
ENSMUSG00000038718	Pbx3	HD	abnormal bone mineralization; abnormal response to new environment; abnormal tooth morphology; absent ovary; decreased blood urea nitrogen level; decreased total body fat amount; increased bone mineral content; increased bone mineral density; increased lean body mass; increased total body fat amount; preweaning lethality complete penetrance; prolonged PQ interval; prolonged PR interval; abnormal …
ENSMUSG00000007946	Phox2a	HD	abnormal autonomic nervous system morphology; abnormal cranial ganglia morphology; abnormal facial nerve morphology; abnormal gluconeogenesis; abnormal glycogen homeostasis; abnormal locus ceruleus morphology; abnormal neuron differentiation; abnormal oculomotor nerve morphology; abnormal otic ganglion morphology; abnormal parasympathetic ganglion morphology; abnormal pterygopalatine ganglion mor…
ENSMUSG00000012520	Phox2b	HD	abnormal area postrema morphology; abnormal autonomic nervous system morphology; abnormal brain interneuron morphology; abnormal breathing pattern; abnormal cardiovascular system morphology; abnormal carotid body morphology; abnormal ciliary ganglion morphology; abnormal cranial ganglia morphology; abnormal cranial nerve morphology; abnormal enteric ganglia morphology; abnormal enteric nervous sy…
ENSMUSG00000021506	Pitx1	HD	abnormal autopod morphology; abnormal digit morphology; abnormal nail morphology; decreased circulating insulin level; fused phalanges; increased bone mineral content; preweaning lethality complete penetrance; abnormal Meckel's cartilage morphology; abnormal adipose tissue amount; abnormal artery morphology; abnormal cartilage morphology; abnormal femur morphology; abnormal fibula morphology; abn…
ENSMUSG00000028023	Pitx2	HD	abnormal optic disk morphology; abnormal tooth morphology; corneal opacity; enlarged heart; increased exploration in new environment; increased grip strength; irregularly shaped pupil; prenatal lethality; preweaning lethality complete penetrance; small testis; abnormal Rathke's pouch apoptosis; abnormal Rathke's pouch development; abnormal adenohypophysis development; abnormal adenohypophysis mor…
ENSMUSG00000025229	Pitx3	HD	abnormal sleep behavior; abnormal social/conspecific interaction; decreased body weight; decreased circulating amylase level; decreased circulating triglyceride level; decreased exploration in new environment; decreased total body fat amount; decreased vertical activity; hyperactivity; hypoactivity; increased body weight; increased bone mineral content; increased circulating alkaline phosphatase …
ENSMUSG00000006705	Pknox1	HD	abnormal behavior; abnormal urination; decreased B cell number; decreased IgG1 level; decreased T cell number; decreased circulating triglyceride level; decreased hemoglobin content; decreased mature B cell number; decreased mean corpuscular hemoglobin concentration; abnormal blood cell morphology/development; abnormal embryonic tissue morphology; abnormal erythropoiesis; abnormal extraembryonic …
ENSMUSG00000035934	Pknox2	HD	abnormal auditory brainstem response; abnormal spleen morphology; small spleen
ENSMUSG00000044542	Prop1	HD	abnormal adenohypophysis development; abnormal enzyme/coenzyme activity; abnormal neurohypophysis morphology; abnormal pituitary gland development; abnormal pituitary gland morphology; abnormal pulmonary alveolus morphology; abnormal respiratory system physiology; abnormal surfactant secretion; absent corpus luteum; absent ovarian follicles; absent somatotrophs; adenohypophysis hypoplasia; atelec…
ENSMUSG00000026586	Prrx1	HD	abnormal Meckel's cartilage morphology; abnormal aortic arch morphology; abnormal artery morphology; abnormal cartilage morphology; abnormal cranium morphology; abnormal fetal ductus arteriosus morphology; abnormal forelimb zeugopod morphology; abnormal hindlimb zeugopod morphology; abnormal incudostapedial joint morphology; abnormal incus morphology; abnormal long bone hypertrophic chondrocyte z…
ENSMUSG00000024518	Rax	HD	abnormal anterior visceral endoderm cell migration; abnormal circardian behavior entrainment; abnormal eye development; abnormal eye morphology; abnormal forebrain morphology; abnormal hypothalamus morphology; abnormal lens development; abnormal lens morphology; abnormal optic cup morphology; abnormal optic nerve morphology; abnormal palate morphology; abnormal suprachiasmatic nucleus morphology;…
ENSMUSG00000027833	Shox2	HD	abnormal allantois morphology; abnormal neural tube morphology; abnormal somite shape; decreased heart left ventricle size; increased cardiac output; prenatal lethality prior to heart atrial septation; preweaning lethality complete penetrance; abnormal blood vessel morphology; abnormal cardiac output; abnormal heart development; abnormal heart morphology; abnormal palatal shelf fusion at midline;…
ENSMUSG00000051367	Six1	HD	abnormal abdominal wall morphology; abnormal blood vessel morphology; abnormal craniofacial morphology; abnormal head shape; abnormal limb morphology; abnormal liver size; abnormal placenta morphology; abnormal placenta vasculature; abnormal tail morphology; decreased circulating alkaline phosphatase level; preweaning lethality complete penetrance; rectal prolapse; abnormal Meckel's cartilage mor…
ENSMUSG00000038805	Six3	HD	abnormal craniofacial morphology; abnormal cranium morphology; abnormal forebrain development; abnormal neural tube morphology; abnormal rostral-caudal axis patterning; absent embryonic telencephalon; absent nasal placodes; absent optic pit; absent optic vesicle; anophthalmia; decreased forebrain size; holoprosencephaly; increased midbrain size; perinatal lethality complete penetrance
ENSMUSG00000021099	Six6	HD	abnormal retina morphology; abnormal retinal ganglion layer morphology; absent optic nerve; pituitary gland hypoplasia; retina hypoplasia
ENSMUSG00000047407	Tgif1	HD	abnormal brain development; abnormal cell cycle; abnormal cytokine level; abnormal fluid regulation; abnormal folding of telencephalic vesicles; abnormal forebrain development; abnormal hindbrain development; abnormal middle ear morphology; abnormal midface morphology; abnormal pinna reflex; abnormal placenta intervillous maternal lacunae morphology; abnormal placenta labyrinth morphology; abnorm…
ENSMUSG00000068327	Tlx2	HD	abnormal amnion morphology; abnormal colon morphology; abnormal ectoderm development; abnormal embryonic tissue morphology; abnormal enteric ganglia morphology; abnormal enteric nervous system morphology; abnormal enteric neuron morphology; abnormal extraembryonic tissue morphology; abnormal innervation; abnormal large intestine morphology; abnormal primitive streak formation; abnormal small inte…
ENSMUSG00000029546	Uncx	HD	abnormal axial skeleton morphology; abnormal dorsal root ganglion morphology; abnormal sclerotome morphology; abnormal spinal nerve morphology; abnormal sternum morphology; abnormal thoracic cage morphology; abnormal vertebrae morphology; abnormal vertebral body morphology; absent proximal rib; absent vertebral pedicles; absent vertebral transverse processes; asymmetric costovertebral joints; dec…
ENSMUSG00000006270	Vax1	HD	decreased circulating chloride level; decreased circulating glucose level; decreased startle reflex; increased circulating alkaline phosphatase level; preweaning lethality incomplete penetrance; abnormal anterior commissure morphology; abnormal axon guidance; abnormal circulating alkaline phosphatase level; abnormal corpus callosum morphology; abnormal ependyma morphology; abnormal eye developmen…
ENSMUSG00000034777	Vax2	HD	abnormal axon guidance; abnormal optic nerve innervation; abnormal retinal ganglion cell morphology; coloboma; decreased body size; microphthalmia; tremors
ENSMUSG00000033080	Vsx1	HD	abnormal cone electrophysiology; abnormal eye electrophysiology; abnormal retinal cone bipolar cell morphology
ENSMUSG00000021239	Vsx2	HD	Harderian gland hypertrophy; abnormal cell cycle checkpoint function; abnormal cell death; abnormal eye development; abnormal eye morphology; abnormal gametogenesis; abnormal hyaloid artery morphology; abnormal lens development; abnormal lens morphology; abnormal nervous system physiology; abnormal optic cup morphology; abnormal optic fissure morphology; abnormal optic nerve morphology; abnormal …
ENSMUSG00000004231	Pax2	HD	Mullerian duct degeneration; Wolffian duct degeneration; abnormal axon extension; abnormal brain commissure morphology; abnormal brain development; abnormal brain morphology; abnormal choroid plexus morphology; abnormal cochlea morphology; abnormal cochlear sensory epithelium morphology; abnormal common crus morphology; abnormal corpora quadrigemina morphology; abnormal diencephalon morphology; a…
ENSMUSG00000027168	Pax6	HD	preweaning lethality complete penetrance; abnormal Bowman membrane morphology; abnormal CNS synaptic transmission; abnormal anterior eye segment morphology; abnormal brain commissure morphology; abnormal brain development; abnormal cerebellar granule cell morphology; abnormal cerebellum external granule cell layer morphology; abnormal cerebellum morphology; abnormal cerebellum vermis morphology; …
ENSMUSG00000004842	Pou1f1	HD	preweaning lethality incomplete penetrance; abnormal Hensen stripe morphology; abnormal actin cytoskeleton morphology; abnormal adenohypophysis morphology; abnormal cerebellar foliation; abnormal cerebellar granule layer morphology; abnormal cerebellum development; abnormal cochlear outer hair cell morphology; abnormal dentate gyrus morphology; abnormal hair cell physiology; abnormal hippocampus …
ENSMUSG00000008496	Pou2f2	HD	abnormal suckling behavior; arrested B cell differentiation; cyanosis; decreased B cell number; decreased B-1 B cell number; decreased IgG1 level; decreased IgM level; decreased immunoglobulin level; decreased mature B cell number; dehydration; lethargy; neonatal lethality complete penetrance
ENSMUSG00000032015	Pou2f3	HD	decreased blood urea nitrogen level; enlarged heart; abnormal bitter taste sensitivity; abnormal gustatory papillae taste bud morphology; abnormal keratinocyte differentiation; abnormal liquid preference; abnormal seminal vesicle morphology; abnormal sweet taste sensitivity; abnormal umami taste sensitivity
ENSMUSG00000090125	Pou3f1	HD	abnormal Schwann cell morphology; abnormal myelination; abnormal olfactory tract morphology; abnormal phrenic nerve morphology; abnormal sciatic nerve morphology; cyanosis; decreased body size; neonatal lethality incomplete penetrance; no abnormal phenotype detected; postnatal lethality complete penetrance; respiratory failure; tremors
ENSMUSG00000095139	Pou3f2	HD	abnormal brown adipose tissue morphology; abnormal hypothalamus morphology; abnormal neurohypophysis morphology; abnormal neuronal precursor cell number; abnormal pituicyte morphology; abnormal pituitary gland morphology; absent subcutaneous adipose tissue; decreased body size; decreased brown adipose tissue amount; flaky skin; hepatic steatosis; hyperkeratosis; postnatal growth retardation; post…
ENSMUSG00000056854	Pou3f4	HD	abnormal Reissner membrane morphology; abnormal bony labyrinth; abnormal cochlea morphology; abnormal gait; abnormal internal auditory canal morphology; abnormal lateral semicircular canal morphology; abnormal oval window morphology; abnormal pinna reflex; abnormal scala tympani morphology; abnormal spiral ligament fibrocyte morphology; abnormal spiral limbus morphology; abnormal stapes crus morp…
ENSMUSG00000024497	Pou4f3	HD	abnormal Deiters cell morphology; abnormal autonomic nervous system physiology; abnormal basilar membrane morphology; abnormal body temperature homeostasis; abnormal circadian temperature homeostasis; abnormal cochlea morphology; abnormal cochlear ganglion morphology; abnormal cochlear hair cell development; abnormal cochlear inner hair cell morphology; abnormal cochlear outer hair cell morpholog…
ENSMUSG00000022556	Hsf1	Others	abnormal embryo size; abnormal sleep behavior; preweaning lethality incomplete penetrance; abnormal astrocyte morphology; abnormal brain morphology; abnormal brain ventricle morphology; abnormal brain white matter morphology; abnormal cell death; abnormal chromosomal synapsis; abnormal corpus callosum morphology; abnormal extraembryonic tissue morphology; abnormal female meiosis; abnormal meiotic…
ENSMUSG00000019878	Hsf2	Others	abnormal retinal blood vessel morphology; decreased circulating glucose level; increased circulating potassium level; increased circulating sodium level; abnormal circulating glucose level; abnormal circulating sodium level; abnormal female germ cell morphology; abnormal male germ cell apoptosis; abnormal male meiosis; abnormal ovarian follicle morphology; abnormal seminiferous tubule morphology;…
ENSMUSG00000003184	Irf3	Others	abnormal heart morphology; abnormal kidney morphology; enlarged lymph nodes; small heart; small kidney; abnormal circulating interferon level; abnormal retinal outer nuclear layer morphology; abnormal retinal outer plexiform layer morphology; decreased a wave amplitude; decreased b wave amplitude; decreased cellular sensitivity to ultraviolet irradiation; decreased total retina thickness; increas…
ENSMUSG00000025498	Irf7	Others	abnormal retina morphology; decreased red blood cell distribution width; increased circulating triglyceride level; thrombocytosis; abnormal T cell physiology; abnormal interferon level; decreased circulating interferon-beta level; decreased interferon-alpha secretion; decreased interferon-beta secretion; increased susceptibility to Herpesvirales infection; increased susceptibility to Orthomyxovir…
ENSMUSG00000041515	Irf8	Others	abnormal sleep behavior; decreased bone mineral content; decreased bone mineral density; decreased fasting circulating glucose level; increased circulating sodium level; increased circulating total protein level; increased prepulse inhibition; abnormal cytotoxic T cell physiology; abnormal definitive hematopoiesis; abnormal erythropoiesis; abnormal humoral immune response; abnormal interferon sec…
ENSMUSG00000001419	Mef2d	Others	abnormal electroretinogram waveform feature; abnormal horizontal cell morphology; abnormal retinal bipolar cell morphology; abnormal retinal cone bipolar cell morphology; abnormal retinal cone cell outer segment morphology; abnormal retinal outer nuclear layer morphology; abnormal retinal outer plexiform layer morphology; abnormal retinal rod cell outer segment morphology; decreased a wave amplit…
ENSMUSG00000024513	Mbd2	Others	abnormal maternal nurturing; abnormal pup retrieval; decreased litter size
ENSMUSG00000031393	Mecp2	Others	abnormal action potential; abnormal associative learning; abnormal behavior; abnormal body temperature; abnormal body weight; abnormal brain development; abnormal brain wave pattern; abnormal breathing pattern; abnormal cell nucleus morphology; abnormal cerebellar granule layer morphology; abnormal cerebellum morphology; abnormal cerebral cortex morphology; abnormal contextual conditioning behavi…
ENSMUSG00000019982	Myb	Others	abnormal heart morphology; decreased prepulse inhibition; enlarged heart; increased hemoglobin content; preweaning lethality incomplete penetrance; abnormal B cell differentiation; abnormal T cell differentiation; abnormal angiogenesis; abnormal common lymphocyte progenitor cell morphology; abnormal definitive hematopoiesis; abnormal double-negative T cell morphology; abnormal embryonic erythropo…
ENSMUSG00000025912	Mybl1	Others	abnormal Sertoli cell morphology; abnormal double-strand DNA break repair; abnormal humoral immune response; abnormal male germ cell apoptosis; abnormal mammary gland epithelium morphology; abnormal mammary gland growth during lactation; abnormal mammary gland growth during pregnancy; abnormal nursing; abnormal spermatocyte morphology; abnormal spleen B cell follicle morphology; abnormal spleen m…
ENSMUSG00000017861	Mybl2	Others	abnormal embryo size; abnormal eye morphology; abnormal forebrain development; abnormal hindbrain development; abnormal midbrain development; abnormal neural tube closure; embryonic lethality prior to organogenesis; embryonic lethality prior to tooth bud stage; increased circulating calcium level; increased neutrophil cell number; preweaning lethality complete penetrance; abnormal inner cell mass…
ENSMUSG00000046532	Ar	NHR	Leydig cell hyperplasia; Leydig cell hypertrophy; Leydig cell hypoplasia; Sertoli cell hypoplasia; abnormal Sertoli cell morphology; abnormal adult Leydig cell differentiation; abnormal anogenital distance; abnormal blood homeostasis; abnormal bone marrow cell number; abnormal cell cytoskeleton morphology; abnormal erythropoiesis; abnormal female reproductive system morphology; abnormal gametogen…
ENSMUSG00000019768	Esr1	NHR	abnormal B cell differentiation; abnormal B cell number; abnormal bone marrow cell number; abnormal bone marrow cell physiology; abnormal bone mineralization; abnormal bone structure; abnormal branching of the mammary ductal tree; abnormal cell migration; abnormal chondrocyte physiology; abnormal class switch recombination; abnormal cremaster muscle morphology; abnormal definitive hematopoiesis; …
ENSMUSG00000021055	Esr2	NHR	decreased bone mineral content; decreased bone mineral density; decreased circulating triglyceride level; decreased heart left ventricle size; decreased lean body mass; decreased leukocyte cell number; decreased lymphocyte cell number; decreased monocyte cell number; increased circulating HDL cholesterol level; increased circulating alkaline phosphatase level; increased circulating serum albumin …
ENSMUSG00000017950	Hnf4a	NHR	abnormal lens morphology; abnormal retinal blood vessel morphology; abnormal retinal vasculature morphology; decreased prepulse inhibition; enlarged thyroid gland; increased circulating cholesterol level; increased total retina thickness; abnormal ectoderm development; abnormal embryo development; abnormal embryonic tissue morphology; abnormal extraembryonic tissue morphology; abnormal gastrulati…
ENSMUSG00000017688	Hnf4g	NHR	abnormal auditory brainstem response; abnormal kidney morphology; small kidney; abnormal energy expenditure; abnormal locomotor activation; abnormal nest building behavior; abnormal respiration; decreased coping response; decreased fluid intake; decreased food intake; increased body weight
ENSMUSG00000020889	Nr1d1	NHR	abnormal bone structure; abnormal eye anterior chamber depth; abnormal eye morphology; abnormal eye posterior chamber depth; decreased NK cell number; decreased cardiac muscle contractility; decreased cardiac output; decreased cardiac stroke volume; decreased circulating alkaline phosphatase level; decreased heart left ventricle size; decreased thigmotaxis; decreased total body fat amount; decrea…
ENSMUSG00000021775	Nr1d2	NHR	abnormal eye morphology; abnormal iris morphology; abnormal lens morphology; abnormal locomotor activation; abnormal pupil morphology; cataract; decreased CD4-positive alpha beta T cell number; decreased CD8-positive alpha-beta T cell number; decreased T cell number; increased B cell number; increased hemoglobin content; abnormal heart morphology; abnormal seminal vesicle morphology; atrioventric…
ENSMUSG00000060601	Nr1h2	NHR	abnormal Sertoli cell morphology; abnormal cellular cholesterol metabolism; abnormal cholesterol homeostasis; abnormal glucose homeostasis; abnormal glycogen homeostasis; abnormal lipid homeostasis; abnormal lipid level; abnormal lung morphology; abnormal myometrium morphology; abnormal oligodendrocyte morphology; abnormal optic nerve morphology; abnormal parturition; abnormal retina morphology; …
ENSMUSG00000047638	Nr1h4	NHR	abnormal tail movements; decreased circulating serum albumin level; decreased mean corpuscular volume; decreased prepulse inhibition; increased circulating HDL cholesterol level; increased circulating alanine transaminase level; increased circulating alkaline phosphatase level; increased circulating aspartate transaminase level; increased circulating cholesterol level; increased circulating trigl…
ENSMUSG00000005893	Nr2c2	NHR	abnormal embryo turning; abnormal eye anterior chamber depth; abnormal neural tube closure; abnormal pharyngeal arch morphology; embryonic lethality prior to tooth bud stage; impaired glucose tolerance; preweaning lethality incomplete penetrance; abnormal blood homeostasis; abnormal eating behavior; abnormal energy homeostasis; abnormal gas homeostasis; abnormal glucose homeostasis; abnormal hemo…
ENSMUSG00000019803	Nr2e1	NHR	abnormal aggression-related behavior; abnormal amygdala morphology; abnormal axon fasciculation; abnormal brain commissure morphology; abnormal cerebral hemisphere morphology; abnormal cortical intermediate zone morphology; abnormal dentate gyrus morphology; abnormal entorhinal cortex morphology; abnormal eye electrophysiology; abnormal hippocampal mossy fiber morphology; abnormal lateral ganglio…
ENSMUSG00000032292	Nr2e3	NHR	abnormal cone electrophysiology; abnormal retinal cone cell morphology; abnormal retinal outer nuclear layer morphology; abnormal retinal photoreceptor morphology; abnormal rod electrophysiology; disorganized retinal outer nuclear layer; increased retinal apoptosis; retinal degeneration; retinal outer nuclear layer degeneration; short photoreceptor outer segment
ENSMUSG00000069171	Nr2f1	NHR	abnormal auditory brainstem response; abnormal craniofacial morphology; abnormal embryo size; pallor; preweaning lethality complete penetrance; respiratory system phenotype; abnormal anterior commissure morphology; abnormal axon guidance; abnormal axon morphology; abnormal brain commissure morphology; abnormal cerebral cortex morphology; abnormal cingulate gyrus morphology; abnormal cochlear hair…
ENSMUSG00000002393	Nr2f6	NHR	abnormal bone structure; decreased bone mineral content; decreased circulating fructosamine level; abnormal bone mineralization; abnormal circadian behavior; abnormal locomotor circadian rhythm; abnormal nociception after inflammation; abnormal spleen weight; abnormal synaptic norepinephrine release; abnormal thermal nociception; shortened circadian behavior period
ENSMUSG00000024431	Nr3c1	NHR	abnormal adrenal chromaffin cell morphology; abnormal adrenal cortex morphology; abnormal adrenal gland morphology; abnormal adrenal gland zona fasciculata morphology; abnormal adrenal gland zona glomerulosa morphology; abnormal adrenal gland zona reticularis morphology; abnormal alveolocapillary membrane morphology; abnormal blood-brain barrier function; abnormal branching involved in terminal b…
ENSMUSG00000026826	Nr4a2	NHR	abnormal dopamine level; abnormal locomotor activation; abnormal midbrain development; abnormal motor capabilities/coordination/movement; abnormal nervous system development; abnormal noradrenaline level; abnormal serotonin level; abnormal substantia nigra morphology; abnormal suckling behavior; abnormal tegmentum morphology; behavioral despair; decreased dopamine level; decreased noradrenaline l…
ENSMUSG00000026751	Nr5a1	NHR	Leydig cell hyperplasia; abnormal aldosterone level; abnormal corticosterone level; abnormal gonadal ridge morphology; abnormal hypothalamus morphology; abnormal innervation; abnormal neuron differentiation; abnormal pituitary gland morphology; abnormal primary sex determination; abnormal progesterone level; abnormal reproductive system morphology; abnormal secondary sex determination; abnormal t…
ENSMUSG00000017491	Rarb	NHR	abnormal basioccipital bone morphology; abnormal excitatory postsynaptic potential; abnormal lung alveolus development; abnormal lung development; abnormal pulmonary alveolar duct morphology; abnormal pulmonary alveolar sac morphology; abnormal pulmonary alveolar system morphology; abnormal respiratory function; abnormal retina morphology; abnormal skeleton morphology; abnormal spatial learning; …
ENSMUSG00000032238	Rora	NHR	decreased startle reflex; preweaning lethality incomplete penetrance; Purkinje cell degeneration; abnormal Purkinje cell dendrite morphology; abnormal Purkinje cell differentiation; abnormal Purkinje cell morphology; abnormal brain interneuron morphology; abnormal brain morphology; abnormal cerebellar Purkinje cell layer; abnormal cerebellar foliation; abnormal cerebellar granule cell morphology;…
ENSMUSG00000036192	Rorb	NHR	abnormal cone electrophysiology; abnormal eye electrophysiology; abnormal eye physiology; abnormal gait; abnormal learning/memory/conditioning; abnormal motor capabilities/coordination/movement; abnormal retina morphology; abnormal retinal cone cell morphology; abnormal retinal development; abnormal retinal ganglion cell morphology; abnormal retinal ganglion layer morphology; abnormal retinal inn…
ENSMUSG00000015846	Rxra	NHR	abnormal T-helper 2 cell morphology; abnormal atrioventricular cushion morphology; abnormal atrioventricular valve morphology; abnormal axial skeleton morphology; abnormal cardiovascular system morphology; abnormal conotruncal ridge morphology; abnormal conotruncus septation; abnormal corneal stroma morphology; abnormal cricoid cartilage morphology; abnormal dendritic cell physiology; abnormal di…
ENSMUSG00000015843	Rxrg	NHR	abnormal bone mineralization; decreased grip strength; decreased mean corpuscular volume; decreased thermal nociceptive threshold; increased bone mineral content; increased bone mineral density; increased circulating HDL cholesterol level; increased circulating cholesterol level; increased circulating triglyceride level; abnormal striatum morphology; catalepsy; increased muscle relaxation; no abn…
ENSMUSG00000058756	Thra	NHR	abnormal body weight; abnormal bone structure; abnormal contextual conditioning behavior; abnormal embryo size; abnormal retinal inner nuclear layer morphology; abnormal tail movements; decreased exploration in new environment; decreased mean corpuscular hemoglobin; decreased startle reflex; decreased total body fat amount; decreased total retina thickness; hyperactivity; improved glucose toleran…
ENSMUSG00000022479	Vdr	NHR	abnormal T cell number; abnormal blood homeostasis; abnormal bone mineralization; abnormal bone ossification; abnormal bone structure; abnormal chemokine secretion; abnormal chondrocyte morphology; abnormal coat/ hair morphology; abnormal colon morphology; abnormal dendritic cell differentiation; abnormal enzyme/coenzyme activity; abnormal epidermis stratum granulosum morphology; abnormal estrous…
ENSMUSG00000059552	Trp53	Others	abnormal retina morphology; increased blood urea nitrogen level; increased large unstained cell number; increased startle reflex; persistence of hyaloid vascular system; preweaning lethality incomplete penetrance; abnormal DNA replication; abnormal Peyer's patch morphology; abnormal abdominal lymph node morphology; abnormal apoptosis; abnormal cardiovascular system physiology; abnormal cell cycle…
ENSMUSG00000022510	Trp63	Others	abnormal abdominal wall morphology; abnormal anus morphology; abnormal apical ectodermal ridge morphology; abnormal cellular replicative senescence; abnormal corneal epithelium morphology; abnormal craniofacial development; abnormal craniofacial morphology; abnormal ectoderm development; abnormal embryo development; abnormal epidermal layer morphology; abnormal epidermis stratum basale morphology…
ENSMUSG00000029026	Trp73	Others	decreased spleen weight; increased blood urea nitrogen level; preweaning lethality incomplete penetrance; abnormal blood urea nitrogen level; abnormal cell cycle; abnormal cerebral cortex morphology; abnormal cerebrospinal fluid production; abnormal choroid plexus morphology; abnormal chromosome number; abnormal cortical marginal zone morphology; abnormal dendrite morphology; abnormal dentate gyr…
ENSMUSG00000014030	Pax5	Others	abnormal auditory brainstem response; decreased leukocyte cell number; hyperactivity; impaired glucose tolerance; increased cardiac muscle contractility; increased circulating triglyceride level; preweaning lethality complete penetrance; abnormal B cell differentiation; abnormal B cell physiology; abnormal cell adhesion; abnormal cell migration; abnormal cerebellar foliation; abnormal cerebellar …
ENSMUSG00000045515	Pou3f3	Others	abnormal cerebral cortex morphology; abnormal distal convoluted tubule morphology; abnormal hippocampus morphology; abnormal incus short process morphology; abnormal loop of Henle morphology; abnormal renal tubule morphology; abnormal stapes morphology; abnormal styloid process morphology; absent temporal bone squamous part; absent temporomandibular joint; absent zygomatic bone; decreased circula…
ENSMUSG00000023411	Nfatc4	Others	increased circulating sodium level; increased erythrocyte cell number; increased prepulse inhibition; cardiac hypertrophy; decreased circulating triglyceride level
ENSMUSG00000028163	Nfkb1	Others	abnormal B cell physiology; abnormal CD4-positive alpha-beta T cell physiology; abnormal Peyer's patch T cell area morphology; abnormal Peyer's patch follicle morphology; abnormal Peyer's patch germinal center morphology; abnormal bone marrow cell morphology/development; abnormal calcium ion homeostasis; abnormal class switch recombination; abnormal cochlear inner hair cell morphology; abnormal c…
ENSMUSG00000020275	Rel	Others	absent vibrissae; decreased eosinophil cell number; decreased monocyte cell number; tremors; abnormal CD4-positive T cell differentiation; abnormal CD4-positive alpha-beta T cell physiology; abnormal DNA replication; abnormal T cell differentiation; abnormal T cell physiology; abnormal T-helper 1 cell differentiation; abnormal cell cycle; abnormal cytokine secretion; abnormal dendritic cell physi…
ENSMUSG00000024927	Rela	Others	abnormal bone structure; abnormal brain morphology; abnormal cell death; abnormal colon morphology; abnormal eye development; abnormal heart morphology; abnormal hepatocyte morphology; abnormal limb morphology; abnormal liver morphology; abnormal lymphocyte physiology; abnormal myogenesis; abnormal neuron physiology; abnormal spleen morphology; abnormal trigeminal nerve morphology; anophthalmia; …
ENSMUSG00000020037	Rfx4	Others	abnormal basal ganglion morphology; abnormal brain development; abnormal brain ependyma motile cilium morphology; abnormal floor plate morphology; abnormal hindbrain morphology; abnormal motor neuron morphology; abnormal spinal cord morphology; abnormal spinal cord motile cilium morphology; abnormal telencephalon morphology; absent subcommissural organ; altered response to myocardial infarction; …
ENSMUSG00000037674	Rfx7	Others	abnormal retina morphology; decreased fasting circulating glucose level; increased exploration in new environment; preweaning lethality incomplete penetrance; abnormal fasting circulating glucose level
ENSMUSG00000070691	Runx3	Others	abnormal facial morphology; abnormal head shape; abnormal locomotor behavior; preweaning lethality complete penetrance; abnormal CD8-positive alpha beta T cell morphology; abnormal CD8-positive alpha-beta T cell differentiation; abnormal auchene hair morphology; abnormal behavior; abnormal bone mineralization; abnormal cecum morphology; abnormal clavicle morphology; abnormal colon morphology; abn…
ENSMUSG00000000731	Aire	Others	abnormal cholesterol homeostasis; abnormal eye morphology; decreased prepulse inhibition; increased monocyte cell number; inflammation; CNS inflammation; abnormal CD4-positive alpha-beta T cell physiology; abnormal T cell activation; abnormal T cell morphology; abnormal T-helper 1 physiology; abnormal T-helper 17 cell physiology; abnormal adaptive immunity; abnormal chemokine level; abnormal cyto…
ENSMUSG00000028565	Nfia	Others	abnormal axon extension; abnormal cerebellar foliation; abnormal cerebellar granule cell morphology; abnormal cerebellar molecular layer; abnormal corpus callosum morphology; abnormal glial cell morphology; abnormal head shape; abnormal hippocampal commissure morphology; abnormal hippocampus morphology; abnormal kidney morphology; abnormal ureterovesical junction morphology; absent corpus callosu…
ENSMUSG00000008575	Nfib	Others	abnormal cerebellar granule cell morphology; abnormal corpus callosum morphology; abnormal craniofacial development; abnormal glial cell morphology; abnormal hippocampal fimbria morphology; abnormal hippocampus CA3 region morphology; abnormal hippocampus development; abnormal lung development; abnormal lung morphology; abnormal lung saccule morphology; abnormal major salivary gland morphology; ab…
ENSMUSG00000021540	Smad5	Others	abnormal allantois morphology; abnormal amnion morphology; abnormal blood vessel morphology; abnormal brain development; abnormal definitive hematopoiesis; abnormal digestive system development; abnormal dorsal aorta morphology; abnormal embryo development; abnormal embryo turning; abnormal embryonic hematopoiesis; abnormal embryonic tissue morphology; abnormal extraembryonic tissue morphology; a…
ENSMUSG00000027796	Smad9	Others	abnormal hindbrain morphology; abnormal lung vasculature morphology; abnormal midbrain morphology; increased lung adenoma incidence; lung inflammation; no abnormal phenotype detected
ENSMUSG00000027985	Lef1	Others	abnormal craniofacial morphology; abnormal embryo size; abnormal heart morphology; decreased prepulse inhibition; enlarged heart; preweaning lethality complete penetrance; abnormal brain morphology; abnormal endometrial gland development; abnormal hair follicle development; abnormal hair follicle morphology; abnormal hippocampus development; abnormal hippocampus region morphology; abnormal mammar…
ENSMUSG00000096014	Sox1	Others	abnormal lens development; abnormal lens vesicle development; abnormal neuronal migration; abnormal nucleus accumbens morphology; abnormal olfactory cortex morphology; abnormal parental behavior; abnormal sexual interaction; abnormal striatum morphology; abnormal ventral striatum morphology; microphthalmia; premature death; seizures; small lens
ENSMUSG00000033006	Sox10	Others	abnormal PNS glial cell morphology; abnormal Schwann cell morphology; abnormal Schwann cell physiology; abnormal adrenal medulla morphology; abnormal axon fasciculation; abnormal axon guidance; abnormal axon morphology; abnormal coat/hair pigmentation; abnormal cranial ganglia morphology; abnormal digestive system physiology; abnormal dorsal root ganglion morphology; abnormal enteric ganglia morp…
ENSMUSG00000063632	Sox11	Others	abnormal bone mineralization; abnormal bone ossification; abnormal bronchus morphology; abnormal calcaneum morphology; abnormal caudal vertebrae morphology; abnormal cerebellum morphology; abnormal cerebral cortex morphology; abnormal cortical ventricular zone morphology; abnormal cranium morphology; abnormal dentate gyrus morphology; abnormal embryonic/fetal subventricular zone morphology; abnor…
ENSMUSG00000046470	Sox18	Others	abnormal behavior; decreased blood urea nitrogen level; decreased thigmotaxis; increased mean corpuscular hemoglobin; abnormal awl hair morphology; abnormal blood urea nitrogen level; abnormal blood vessel morphology; abnormal hair follicle morphology; abnormal hair growth; abnormal lymphatic vessel morphology; abnormal pericyte morphology; abnormal vascular endothelial cell physiology; abnormal …
ENSMUSG00000074637	Sox2	Others	abnormal neural tube morphology; preweaning lethality complete penetrance; abnormal Ebner's gland morphology; abnormal adenohypophysis development; abnormal auchene hair morphology; abnormal awl hair morphology; abnormal brain morphology; abnormal cerebral cortex morphology; abnormal cochlear hair cell morphology; abnormal digestive system physiology; abnormal ectoderm development; abnormal epend…
ENSMUSG00000045179	Sox3	Others	abnormal Rathke's pouch development; abnormal Sertoli cell morphology; abnormal adenohypophysis development; abnormal brain commissure morphology; abnormal corpus callosum morphology; abnormal craniofacial morphology; abnormal diencephalon morphology; abnormal female reproductive system morphology; abnormal hippocampal commissure morphology; abnormal hypothalamus morphology; abnormal oocyte morph…
ENSMUSG00000040489	Sox30	Others	increased prepulse inhibition; persistence of hyaloid vascular system; abnormal spermatid morphology; abnormal spermatogenesis; arrest of spermatogenesis; arrest of spermiogenesis; azoospermia; increased male germ cell apoptosis; male infertility; multinucleated giant male germ cells; small epididymis; small testis
ENSMUSG00000000782	Tcf7	Others	abnormal eye morphology; abnormal forelimb morphology; abnormal lens morphology; abnormal response to tactile stimuli; cataract; decreased CD4-positive alpha beta T cell number; decreased IgG1 level; decreased IgG2b level; decreased T cell number; increased B cell number; increased circulating HDL cholesterol level; syndactyly; abnormal T cell differentiation; abnormal memory T cell physiology; d…
ENSMUSG00000055799	Tcf7l1	Others	abnormal blood vessel morphology; abnormal brain development; abnormal eyelid development; abnormal foregut morphology; abnormal limb bud morphology; abnormal limb development; abnormal neural fold formation; abnormal notochord morphology; abnormal primitive streak formation; abnormal rostral-caudal axis patterning; absent heart; absent somites; corneal opacity; decreased embryo size; decreased f…
ENSMUSG00000024985	Tcf7l2	Others	decreased circulating alkaline phosphatase level; decreased total body fat amount; increased bone mineral content; increased bone mineral density; increased lean body mass; preweaning lethality complete penetrance; abnormal Mullerian duct morphology; abnormal Wolffian duct morphology; abnormal adipose tissue amount; abnormal basilar artery morphology; abnormal bone mineralization; abnormal cecum …
ENSMUSG00000026104	Stat1	Others	abnormal freezing behavior; abnormal gait; abnormal retinal inner nuclear layer morphology; decreased bone mineral density; decreased lymphocyte cell number; decreased mean corpuscular volume; enlarged lymph nodes; impaired righting response; increased basophil cell number; increased lymphocyte cell number; increased neutrophil cell number; abnormal CD4-positive T cell differentiation; abnormal C…
ENSMUSG00000062327	T	Others	abnormal allantois morphology; abnormal axial mesoderm morphology; abnormal bone ossification; abnormal cervical atlas morphology; abnormal cervical vertebrae morphology; abnormal dorsal aorta morphology; abnormal embryo development; abnormal epidermal layer morphology; abnormal forelimb bud morphology; abnormal head shape; abnormal heart looping; abnormal heart tube morphology; abnormal limb bud…
ENSMUSG00000035033	Tbr1	Others	decreased blood urea nitrogen level; decreased circulating calcium level; decreased circulating glucose level; decreased circulating serum albumin level; decreased circulating total protein level; increased erythrocyte cell number; increased prepulse inhibition; preweaning lethality incomplete penetrance; abnormal amygdala morphology; abnormal anterior commissure morphology; abnormal brain intern…
ENSMUSG00000009097	Tbx1	Others	aberrant origin of the right subclavian artery; abnormal accessory nerve morphology; abnormal aortic arch morphology; abnormal arcus anterior morphology; abnormal artery development; abnormal auditory brainstem response; abnormal blood vessel morphology; abnormal cardiac outflow tract development; abnormal cardiovascular development; abnormal cardiovascular system morphology; abnormal cervical at…
ENSMUSG00000031965	Tbx20	Others	abnormal blood vessel morphology; abnormal forebrain development; abnormal heart looping; abnormal heart morphology; abnormal hindbrain development; abnormal neural tube closure; abnormal neural tube morphology; abnormal pharyngeal arch morphology; abnormal visceral yolk sac morphology; abnormal vitelline vasculature morphology; decreased mean platelet volume; preweaning lethality complete penetr…
ENSMUSG00000000094	Tbx4	Others	abnormal embryo size; abnormal forebrain development; abnormal hindbrain development; abnormal midbrain development; abnormal neural tube closure; embryonic lethality prior to tooth bud stage; increased respiratory quotient; preweaning lethality complete penetrance; abnormal allantois morphology; abnormal fibula morphology; abnormal limb development; abnormal patella morphology; abnormal pelvic g…
ENSMUSG00000014767	Tbp	Others	abnormal blood coagulation; ataxia; embryonic growth arrest; embryonic lethality at implantation complete penetrance; embryonic lethality during organogenesis incomplete penetrance; fetal growth retardation; hemophagocytosis; limb grasping; placenta hemorrhage; postnatal lethality incomplete penetrance; short stride length
ENSMUSG00000055320	Tead1	Others	abnormal auditory brainstem response; abnormal embryo size; abnormal embryo turning; abnormal eye anterior chamber depth; abnormal eye morphology; abnormal retina morphology; abnormal tooth morphology; decreased cornea thickness; embryonic lethality prior to tooth bud stage; increased bone mineral density; increased total body fat amount; preweaning lethality complete penetrance; abnormal adipose…
ENSMUSG00000030796	Tead2	Others	exencephaly; no abnormal phenotype detected; prenatal lethality incomplete penetrance
ENSMUSG00000024140	Epas1	Others	abnormal heart morphology; decreased hemoglobin content; decreased lean body mass; decreased leukocyte cell number; increased circulating HDL cholesterol level; increased circulating cholesterol level; increased circulating potassium level; increased total body fat amount; preweaning lethality complete penetrance; abnormal alveolar lamellar body morphology; abnormal angiogenesis; abnormal cardiov…
ENSMUSG00000046957	Spz1	Others	abnormal freezing behavior; cataract; impaired contextual conditioning behavior; increased red blood cell distribution width; abnormal retina morphology; increased heart weight
ENSMUSG00000042596	Tfap2d	Others	absent inferior colliculus; increased apoptosis
ENSMUSG00000036816	Atoh7	bHLH	abnormal Muller cell morphology; abnormal amacrine cell morphology; abnormal blood vessel morphology; abnormal cell cycle; abnormal circardian behavior entrainment; abnormal eye development; abnormal eye electrophysiology; abnormal optic nerve morphology; abnormal optic vesicle formation; abnormal retina morphology; abnormal retinal bipolar cell morphology; abnormal retinal cone bipolar cell morp…
ENSMUSG00000045493	Bhlhe23	bHLH	abnormal eye electrophysiology; abnormal retinal rod bipolar cell morphology; increased retinal apoptosis
ENSMUSG00000046518	Ferd3l	bHLH	abnormal floor plate morphology; abnormal neuron differentiation; abnormal neuronal precursor proliferation; decreased dopaminergic neuron number
ENSMUSG00000038193	Hand2	bHLH	abnormal Meckel's cartilage morphology; abnormal apical ectodermal ridge morphology; abnormal atrioventricular cushion morphology; abnormal cardiac outflow tract development; abnormal craniofacial bone morphology; abnormal facial morphology; abnormal first pharyngeal arch artery morphology; abnormal first pharyngeal arch morphology; abnormal forelimb bud morphology; abnormal forelimb morphology; …
ENSMUSG00000032744	Heyl	bHLH	abnormal sleep behavior; increased circulating HDL cholesterol level; decreased sensory neuron number; no abnormal phenotype detected
ENSMUSG00000030544	Mesp1	bHLH	abnormal blood vessel morphology; abnormal cardiogenic mesoderm morphology; abnormal ectoderm development; abnormal endoderm development; abnormal gastrulation; abnormal heart development; abnormal heart looping; abnormal heart tube morphology; abnormal mesoderm development; abnormal neural fold formation; abnormal neural tube morphology; abnormal paraxial mesoderm morphology; abnormal primitive …
ENSMUSG00000030543	Mesp2	bHLH	abnormal axial skeleton morphology; abnormal axon extension; abnormal blood vessel morphology; abnormal cervical vertebrae morphology; abnormal dermomyotome development; abnormal ectoderm development; abnormal endoderm development; abnormal gastrulation; abnormal mesoderm development; abnormal paraxial mesoderm morphology; abnormal primitive streak formation; abnormal rib morphology; abnormal ros…
ENSMUSG00000048015	Neurod4	bHLH	abnormal cerebellar lobule formation; abnormal cerebellum external granule cell layer morphology; abnormal drinking behavior; absent cerebellar lobules; ataxia; decreased body weight; impaired balance; postnatal growth retardation; postnatal lethality incomplete penetrance; premature death; small cerebellum; thin cerebellar granule layer; thin cerebellar molecular layer
ENSMUSG00000046160	Olig1	bHLH	decreased circulating phosphate level; decreased circulating triglyceride level; abnormal brain interneuron morphology; abnormal cerebellum morphology; abnormal cerebral cortex pyramidal cell morphology; abnormal circulating phosphate level; abnormal olfactory bulb interneuron morphology; abnormal oligodendrocyte morphology; decreased oligodendrocyte number
ENSMUSG00000028417	Tal2	bHLH	abnormal inferior colliculus morphology; abnormal superior colliculus morphology; abnormal tectum morphology; abnormal thalamus morphology; convulsive seizures; decreased superior colliculus size; dilated lateral ventricles; hypoactivity; lethality at weaning complete penetrance; obstructive hydrocephaly; postnatal growth retardation
ENSMUSG00000038539	Atf5	bZIP	abnormal olfactory epithelium morphology; abnormal olfactory sensory neuron morphology; absent gastric milk in neonates; decreased body weight; decreased survivor rate; neonatal lethality incomplete penetrance; postnatal lethality incomplete penetrance
ENSMUSG00000048251	Bcl11b	ZF	abnormal bone structure; abnormal craniofacial morphology; abnormal embryo size; abnormal facial morphology; abnormal forebrain morphology; abnormal head shape; abnormal head size; abnormal outer ear morphology; decreased total body fat amount; increased bone mineral content; increased fasting circulating glucose level; increased lean body mass; increased vertical activity; preweaning lethality c…
ENSMUSG00000028487	Bnc2	ZF	decreased exploration in new environment; increased cornea thickness; increased prepulse inhibition; abnormal cornea thickness; abnormal maxillary shelf morphology; abnormal palate development; abnormal prepulse inhibition; abnormal pterygoid process morphology; absent palatine bone; cleft secondary palate; decreased birth body size; decreased tongue size; frontal bone hypoplasia; large posterior…
ENSMUSG00000029697	Fezf1	ZF	abnormal axon extension; abnormal embryonic/fetal subventricular zone morphology; abnormal neuronal migration; abnormal olfactory bulb development; abnormal olfactory sensory neuron morphology; abnormal reflex; abnormal rostral migratory stream morphology; distended abdomen; neonatal lethality incomplete penetrance; no abnormal phenotype detected; perinatal lethality complete penetrance; small ol…
ENSMUSG00000021743	Fezf2	ZF	abnormal axon guidance; abnormal axon morphology; abnormal cerebral cortex morphology; abnormal food preference; abnormal stationary movement; abnormal telencephalon development; abnormal thalamus morphology; abnormal vomeronasal organ morphology; abnormal vomeronasal sensory neuron morphology; absent corpus callosum; hyperactivity; increased anterior commissure size; postnatal growth retardation…
ENSMUSG00000015501	Hivep2	ZF	CNS inflammation; abnormal T-helper 2 cell morphology; abnormal astrocyte physiology; abnormal brain wave pattern; abnormal cerebellar granule cell morphology; abnormal cerebral cortex morphology; abnormal dendritic spine morphology; abnormal dentate gyrus morphology; abnormal dentate gyrus neuron dendrite morphology; abnormal hippocampus granule cell morphology; abnormal immune system cell morph…
ENSMUSG00000055148	Klf2	ZF	abnormal aorta tunica media morphology; abnormal blood vessel morphology; abnormal embryonic tissue morphology; abnormal lung morphology; abnormal mandible morphology; abnormal vascular endothelial cell morphology; abnormal vascular smooth muscle morphology; anemia; aneurysm; decreased embryo size; embryo tissue necrosis; embryonic growth retardation; embryonic lethality during organogenesis comp…
ENSMUSG00000020453	Patz1	ZF	preweaning lethality complete penetrance; Leydig cell hyperplasia; abnormal T cell subpopulation ratio; abnormal brain morphology; abnormal cardiac outflow tract development; abnormal cell cycle; abnormal choroid plexus morphology; abnormal descending aorta morphology; abnormal diencephalon morphology; abnormal embryonic neuroepithelium morphology; abnormal embryonic/fetal subventricular zone mor…
ENSMUSG00000079466	Prdm12	ZF	abnormal embryo size; hypoactivity; increased anxiety-related response; increased circulating cholesterol level; pallor; preweaning lethality complete penetrance; abnormal superior glossopharyngeal ganglion morphology; decreased neuron number; decreased sensory neuron number; increased neuron apoptosis; neonatal lethality complete penetrance; small dorsal root ganglion; small trigeminal ganglion
ENSMUSG00000014039	Prdm15	ZF	abnormal anterior head development; abnormal brain morphology; abnormal embryonic neuroepithelium morphology; abnormal eye morphology; abnormal forebrain development; abnormal lateral ganglionic eminence morphology; abnormal medial ganglionic eminence morphology; abnormal rostral-caudal axis patterning; abnormal visceral yolk sac endoderm morphology; decreased embryo size; embryonic growth retard…
ENSMUSG00000035529	Prdm4	ZF	abnormal bone structure; abnormal cornea morphology; abnormal gait; abnormal heart left ventricle morphology; abnormal iris morphology; abnormal sinus arrhythmia; absent spleen; decreased total body fat amount; enlarged urinary bladder; hyperactivity; increased cardiac muscle contractility; increased lean body mass; microphthalmia; abnormal cardiac muscle contractility; no abnormal phenotype dete…
ENSMUSG00000048562	Sp8	ZF	abnormal anal canal morphology; abnormal apical ectodermal ridge morphology; abnormal caudal vertebrae morphology; abnormal craniofacial morphology; abnormal femur morphology; abnormal forelimb bud morphology; abnormal forelimb morphology; abnormal genital tubercle morphology; abnormal hindlimb morphology; abnormal humerus morphology; abnormal limb development; abnormal lumbar vertebrae morpholog…
ENSMUSG00000068859	Sp9	ZF	abnormal medium spiny neuron morphology; abnormal striatum morphology; decreased brain weight; decreased neuronal precursor proliferation; decreased striatum size; increased neuron apoptosis; postnatal lethality complete penetrance; weakness
ENSMUSG00000091736	Yy2	ZF	abnormal eye morphology; abnormal lymph node morphology; anophthalmia; enlarged lymph nodes; increased neutrophil cell number
ENSMUSG00000063659	Zbtb18	ZF	abnormal axon extension; abnormal axon morphology; abnormal cerebellar foliation; abnormal cortical ventricular zone morphology; abnormal hippocampus granule cell layer; abnormal hippocampus morphology; abnormal hippocampus pyramidal cell layer; abnormal neocortex morphology; abnormal neuron differentiation; abnormal neuron physiology; abnormal neuronal migration; abnormal neuronal precursor prol…
ENSMUSG00000022708	Zbtb20	ZF	abnormal Ammon gyrus morphology; abnormal blood homeostasis; abnormal cerebral cortex pyramidal cell morphology; abnormal dentate gyrus morphology; abnormal glycogen homeostasis; abnormal hippocampus CA1 region morphology; abnormal hippocampus development; abnormal long term object recognition memory; abnormal neurite morphology; abnormal neuron differentiation; abnormal neuron morphology; abnorm…
ENSMUSG00000006310	Zbtb32	ZF	abnormal behavior; decreased thigmotaxis; abnormal cell physiology; abnormal cytokine secretion; abnormal definitive hematopoiesis; increased T cell proliferation; no abnormal phenotype detected
ENSMUSG00000026788	Zbtb43	ZF	abnormal behavior; decreased startle reflex; decreased thigmotaxis; hyperactivity; impaired pupillary reflex; abnormal anxiety-related response; abnormal locomotor activation
ENSMUSG00000028952	Zbtb48	ZF	abnormal eye morphology; abnormal heart morphology; abnormal skin morphology; abnormal spleen morphology; decreased neutrophil cell number; enlarged heart; enlarged spleen; impaired glucose tolerance; increased bone mineral content; prolonged QRS complex duration; scaly skin; abnormal bone mineralization; abnormal bone structure; decreased circulating triglyceride level
ENSMUSG00000058638	Zfp110	ZF	decreased embryo size; decreased retinal apoptosis; decreased testis weight; embryonic lethality during organogenesis complete penetrance; no abnormal phenotype detected; perinatal lethality incomplete penetrance
ENSMUSG00000062012	Zfp13	ZF	abnormal tail movements; decreased circulating creatinine level; decreased hemoglobin content; decreased prepulse inhibition; increased circulating sodium level
ENSMUSG00000022811	Zfp148	ZF	abnormal embryo size; abnormal kidney morphology; abnormal skin coloration; decreased spleen weight; increased bone mineral content; increased bone mineral density; increased total body fat amount; preweaning lethality complete penetrance; short tibia; abnormal bone mineral density; abnormal bone mineralization; abnormal lung development; abnormal lung saccule morphology; abnormal male germ cell …
ENSMUSG00000006720	Zfp184	ZF	abnormal behavior
ENSMUSG00000051469	Zfp24	ZF	abnormal extraembryonic tissue physiology; abnormal myelin sheath morphology; abnormal myelination; abnormal spinal cord white matter morphology; absent inner cell mass proliferation; decreased brain size; decreased myelin sheath thickness; decreased oligodendrocyte number; decreased spinal cord size; embryonic lethality between implantation and somite formation complete penetrance; increased or …
ENSMUSG00000059878	Zfp422	ZF	abnormal coat/ hair morphology; abnormal retina morphology; abnormal startle reflex; absent vibrissae; improved glucose tolerance; increased grip strength
ENSMUSG00000045333	Zfp423	ZF	abnormal embryo turning; abnormal pericardium morphology; preweaning lethality complete penetrance; abnormal Purkinje cell dendrite morphology; abnormal cerebellar cortex morphology; abnormal cerebellar granule cell precursor proliferation; abnormal cerebellar plate morphology; abnormal cerebellum development; abnormal cerebellum lateral hemisphere morphology; abnormal cerebellum morphology; abno…
ENSMUSG00000024420	Zfp521	ZF	abnormal cerebellum morphology; abnormal clavicle morphology; abnormal dentate gyrus morphology; abnormal hippocampus development; abnormal hippocampus granule cell morphology; abnormal hippocampus morphology; abnormal hippocampus neuron morphology; abnormal impulsive behavior control; abnormal learning/memory/conditioning; abnormal neuronal stem cell physiology; abnormal resting posture; abnorma…
ENSMUSG00000055633	Zfp580	ZF	abnormal retinal inner nuclear layer morphology; decreased total retina thickness
ENSMUSG00000046792	Zfp787	ZF	decreased prepulse inhibition; decreased total body fat amount; impaired glucose tolerance; increased body length; increased fasting circulating glucose level; increased heart weight; increased lean body mass; abnormal prepulse inhibition
ENSMUSG00000036972	Zic4	ZF	abnormal cerebellar foliation; abnormal cerebellum vermis morphology; ataxia; cerebellum hypoplasia; cerebellum vermis hypoplasia; decreased body weight; impaired righting response; postnatal lethality incomplete penetrance
ENSMUSG00000026872	Zeb2	HD	abnormal cranial neural crest cell migration; abnormal embryo development; abnormal neural crest cell delamination; abnormal neural plate morphology; abnormal somite development; abnormal somite shape; absent first pharyngeal arch; absent vagal neural crest cells; decreased somite size; embryonic growth arrest; embryonic lethality during organogenesis complete penetrance; incomplete embryo turnin…
ENSMUSG00000038872	Zfhx3	HD	abnormal circadian behavior; abnormal circadian behavior phase; abnormal circardian behavior entrainment; abnormal eating behavior; abnormal fertility/fecundity; advanced circadian behavior phase; arrhythmic circadian behavior persistence; decreased body size; decreased body weight; decreased growth hormone level; decreased thyroid-stimulating hormone level; hypoactivity; no abnormal phenotype de…
ENSMUSG00000063804	Lin28b	Others	abnormal sleep behavior; hypoactivity; increased heart rate; shortened RR interval; shortened ST segment; decreased body size; no abnormal phenotype detected
ENSMUSG00000028639	Ybx1	Others	abnormal brain development; abnormal cell morphology; abnormal craniofacial morphology; abnormal definitive hematopoiesis; abnormal mandible morphology; abnormal maxilla morphology; abnormal neural tube closure; abnormal redox activity; cyanosis; decreased embryo size; decreased fetal size; decreased fibroblast proliferation; early cellular replicative senescence; edema; embryonic growth retardat…
ENSMUSG00000023927	Satb1	HD	abnormal auditory brainstem response; abnormal bone structure; abnormal vitreous body morphology; decreased CD4-negative NK T cell number; decreased NK T cell number; decreased startle reflex; decreased total body fat amount; hyperactivity; increased bone mineral content; increased bone mineral density; increased exploration in new environment; increased lean body mass; preweaning lethality compl…
ENSMUSG00000038331	Satb2	HD	abnormal craniofacial morphology; abnormal uterus morphology; decreased circulating bilirubin level; enlarged lymph nodes; increased circulating alkaline phosphatase level; increased exploration in new environment; increased mean corpuscular volume; preweaning lethality complete penetrance; abnormal bone mineralization; abnormal bone ossification; abnormal bone structure; abnormal circulating alk…
ENSMUSG00000004099	Dnmt1	Others	abnormal DNA methylation; abnormal embryonic tissue morphology; abnormal imprinting; abnormal neural tube morphology; absent somites; decreased cell proliferation; embryonic growth arrest; embryonic lethality complete penetrance; failure of initiation of embryo turning; failure of somite differentiation; female infertility; impaired somite development; increased embryonic tissue cell apoptosis; i…
ENSMUSG00000054611	Kdm2a	Others	abnormal embryonic neuroepithelium morphology; abnormal heart looping; abnormal neuron proliferation; decreased embryo size; delayed neural tube closure; embryonic growth retardation; embryonic lethality during organogenesis complete penetrance; impaired neuron differentiation; incomplete embryo turning; increased neural crest cell apoptosis; increased neuron apoptosis; small heart
ENSMUSG00000029475	Kdm2b	Others	decreased circulating phosphate level; decreased circulating serum albumin level; decreased heart left ventricle size; decreased hemoglobin content; hypoactivity; abnormal heart morphology; abnormal neuronal precursor proliferation; abnormal optic fissure closure; abnormal retina morphology; abnormal somite development; absent cerebral aqueduct; absent fourth ventricle; curly tail; decreased body…
ENSMUSG00000002028	Kmt2a	Others	abnormal retina morphology; decreased bone mineral density; decreased total body fat amount; increased lean body mass; preweaning lethality complete penetrance; abnormal arcus anterior morphology; abnormal behavior; abnormal blood cell morphology/development; abnormal cervical atlas morphology; abnormal cervical axis morphology; abnormal cervical vertebrae morphology; abnormal common myeloid prog…
ENSMUSG00000047146	Tet1	Others	abnormal double-strand DNA break repair; abnormal embryo development; abnormal female meiosis; abnormal female reproductive system physiology; abnormal forebrain development; abnormal head fold morphology; abnormal interfrontal bone morphology; abnormal lamina terminalis morphology; abnormal lateral ventricle morphology; abnormal neural tube closure; abnormal paraventricular hypothalamic nucleus …
ENSMUSG00000042372	Dmrt3	Others	abnormal central pattern generator function; abnormal gait; abnormal neocortex morphology; abnormal reproductive system development; abnormal spinal cord interneuron morphology; impaired limb coordination; impaired swimming; jerky movement; long stride length; malocclusion; premature death
ENSMUSG00000047143	Dmrta2	Others	abnormal brain commissure morphology; abnormal cerebral cortex morphology; abnormal cerebral hemisphere morphology; abnormal cortical ventricular zone morphology; abnormal hippocampus morphology; abnormal neocortex morphology; abnormal nervous system tract morphology; abnormal neuronal precursor proliferation; abnormal subplate morphology; abnormal telencephalon morphology; absent choroid plexus;…
ENSMUSG00000010476	Ebf3	Others	abnormal sensory neuron innervation pattern; neonatal lethality complete penetrance; small olfactory bulb
ENSMUSG00000040857	Erf	Others	abnormal embryo size; abnormal forebrain development; abnormal heart morphology; abnormal hindbrain development; abnormal limb bud morphology; abnormal midbrain development; abnormal neural tube closure; abnormal snout morphology; decreased circulating insulin level; decreased circulating triglyceride level; embryonic lethality prior to tooth bud stage; enlarged heart; hydrometra; improved glucos…
ENSMUSG00000044518	Foxe3	Others	abnormal brain morphology; abnormal eye morphology; abnormal skin morphology; abnormal testis morphology; corneal opacity; hydrocephaly; impaired contextual conditioning behavior; microphthalmia; small testis; abnormal anterior eye segment morphology; abnormal aorta morphology; abnormal aortic arch morphology; abnormal ascending aorta morphology; abnormal canal of Schlemm morphology; abnormal cil…
ENSMUSG00000038402	Foxf2	Others	abnormal anterior eye segment morphology; abnormal canal of Schlemm morphology; abnormal ciliary muscle morphology; abnormal ciliary process morphology; abnormal eye development; abnormal eye morphology; abnormal iridocorneal angle; abnormal iris stroma morphology; abnormal maxillary shelf morphology; abnormal optic canal morphology; abnormal palatine bone horizontal plate morphology; abnormal pr…
ENSMUSG00000033837	Foxh1	Others	abdominal situs ambiguus; abnormal anterior head development; abnormal anterior primitive streak morphology; abnormal aortic arch morphology; abnormal cardiac outflow tract development; abnormal cranium morphology; abnormal heart development; abnormal heart left ventricle morphology; abnormal heart looping; abnormal heart ventricle morphology; abnormal inferior vena cava morphology; abnormal inte…
ENSMUSG00000055874	Foxi3	Others	abnormal Meckel's cartilage morphology; abnormal facial morphology; abnormal geniculate ganglion morphology; abnormal mandible morphology; abnormal maxilla morphology; abnormal middle ear morphology; abnormal nervous system development; abnormal otic placode morphology; abnormal palatine bone morphology; abnormal pharyngeal pouch morphology; abnormal temporal bone squamous part morphology; abnorm…
ENSMUSG00000033713	Foxn3	Others	decreased cornea thickness; preweaning lethality complete penetrance; abnormal basioccipital bone morphology; abnormal basisphenoid bone morphology; abnormal brain morphology; abnormal craniofacial bone morphology; abnormal frontal bone morphology; abnormal neurocranium morphology; abnormal occipital bone morphology; abnormal palatal shelf fusion at midline; abnormal palate bone morphology; abnor…
ENSMUSG00000023991	Foxp4	Others	abnormal cardiovascular system physiology; abnormal digestive system development; abnormal floor plate morphology; abnormal heart morphology; abnormal heart position or orientation; abnormal neural tube morphology; abnormal notochord morphology; cardia bifida; embryonic lethality during organogenesis incomplete penetrance; exencephaly; holoprosencephaly; spina bifida; tracheoesophageal fistula
ENSMUSG00000074676	Foxs1	Others	abnormal blood vessel endothelium morphology; decreased susceptibility to diet-induced obesity; enhanced coordination
ENSMUSG00000021362	Gcm2	Others	abnormal DNA methylation; abnormal bone ossification; abnormal neuron differentiation; abnormal parathyroid gland development; abnormal third pharyngeal arch morphology; abnormal trabecular bone morphology; absent parathyroid glands; decreased activity of parathyroid; decreased brain size; decreased circulating calcium level; decreased circulating parathyroid hormone level; decreased circulating …
ENSMUSG00000060261	Gtf2i	Others	abnormal behavior; abnormal brain development; abnormal craniofacial morphology; abnormal embryo development; absent embryonic epiblast; broad nasal bridge; decreased body size; decreased embryo size; decreased embryonic epiblast cell proliferation; decreased exploration in new environment; decreased vertical activity; dilated allantois; distended pericardium; embryonic growth retardation; embryo…
ENSMUSG00000023079	Gtf2ird1	Others	abnormal behavior; abnormal brain development; abnormal circadian behavior; abnormal craniofacial morphology; abnormal cued conditioning behavior; abnormal eating behavior; abnormal facial morphology; abnormal fear/anxiety-related behavior; abnormal frontonasal suture morphology; abnormal gait; abnormal hepatocyte morphology; abnormal jaw morphology; abnormal laryngeal muscle morphology; abnormal…
ENSMUSG00000029754	Dlx6	HD	abnormal alisphenoid bone morphology; abnormal basicranium morphology; abnormal basisphenoid bone morphology; abnormal brain development; abnormal craniofacial bone morphology; abnormal craniofacial development; abnormal digit morphology; abnormal first pharyngeal arch morphology; abnormal frontal bone morphology; abnormal gonial bone morphology; abnormal hindlimb morphology; abnormal hyoid bone …
ENSMUSG00000033726	Emx1	HD	abnormal bone structure; abnormal heart morphology; decreased brain weight; decreased exploration in new environment; decreased grip strength; decreased total body fat amount; enlarged heart; female infertility; increased bone mineral content; increased lean body mass; abnormal adipose tissue amount; abnormal bone mineralization; abnormal corpus callosum morphology; abnormal exploration in a new …
ENSMUSG00000053129	Gsx1	HD	abnormal gland morphology; abnormal gland physiology; abnormal hypothalamus secretion; abnormal long bone epiphyseal ossification zone morphology; abnormal ovarian secretion; abnormal pituitary secretion; abnormal testes secretion; abnormal thermosensation; decreased body size; decreased body weight; decreased lactotroph cell number; decreased leukocyte cell number; decreased lymphocyte cell numb…
ENSMUSG00000040726	Hesx1	HD	abnormal forebrain development; abnormal neural tube morphology; preweaning lethality complete penetrance; abnormal Rathke's pouch development; abnormal adenohypophysis morphology; abnormal anterior commissure morphology; abnormal anterior eye segment morphology; abnormal corpus callosum morphology; abnormal craniofacial morphology; abnormal dorsal telencephalic commissure morphology; abnormal ey…
ENSMUSG00000024986	Hhex	HD	abnormal anterior definitive endoderm morphology; abnormal anterior visceral endoderm morphology; abnormal atrioventricular cushion morphology; abnormal atrioventricular valve morphology; abnormal blood vessel morphology; abnormal cardiac epithelial to mesenchymal transition; abnormal conotruncal ridge morphology; abnormal egg cylinder morphology; abnormal embryo development; abnormal first phary…
ENSMUSG00000040148	Hmx3	HD	abnormal behavior; abnormal defecation; abnormal gait; abnormal locomotor activation; decreased body weight; decreased circulating free fatty acid level; decreased circulating triglyceride level; decreased grip strength; hyperactivity; increased thermal nociceptive threshold; abnormal crista ampullaris morphology; abnormal decidualization; abnormal endolymphatic duct morphology; abnormal hypothal…
ENSMUSG00000018973	Hoxb1	HD	abnormal axon guidance; abnormal buccinator muscle morphology; abnormal cochlear VIII nucleus morphology; abnormal craniofacial morphology; abnormal depressor anguli oris muscle morphology; abnormal digastric posterior belly morphology; abnormal facial motor nucleus morphology; abnormal facial nerve morphology; abnormal lower lip morphology; abnormal masseter muscle morphology; abnormal nervous s…
ENSMUSG00000075588	Hoxb2	HD	abnormal arcus anterior morphology; abnormal body wall morphology; abnormal brain development; abnormal brainstem morphology; abnormal cochlear VIII nucleus morphology; abnormal cochlear outer hair cell morphology; abnormal eye physiology; abnormal facial nerve morphology; abnormal lower lip morphology; abnormal maternal nurturing; abnormal organ of Corti morphology; abnormal pons morphology; abn…
ENSMUSG00000060969	Irx1	HD	abnormal abdominal wall morphology; abnormal behavior; abnormal craniofacial morphology; abnormal cranium morphology; abnormal embryo size; abnormal forebrain morphology; abnormal heart morphology; abnormal hindbrain morphology; abnormal midbrain morphology; abnormal neural tube closure; decreased grip strength; decreased total body fat amount; hypoactivity; increased thigmotaxis; preweaning leth…
ENSMUSG00000025216	Lbx1	HD	abnormal GABAergic neuron morphology; abnormal coronary vessel morphology; abnormal dorsal spinal root morphology; abnormal forelimb morphology; abnormal glutaminergic neuron morphology; abnormal heart development; abnormal heart looping; abnormal hindlimb morphology; abnormal hypaxial muscle morphology; abnormal muscle precursor cell migration; abnormal myogenesis; abnormal neural tube morpholog…
ENSMUSG00000041309	Nkx6-2	HD	abnormal myelination; abnormal nerve conduction; abnormal optic nerve morphology; axon degeneration; impaired coordination; no abnormal phenotype detected
ENSMUSG00000041730	Prrxl1	HD	abnormal craniofacial morphology; abnormal embryo turning; abnormal forebrain development; abnormal head shape; abnormal heart morphology; abnormal hindbrain development; abnormal midbrain development; abnormal neural tube closure; improved glucose tolerance; preweaning lethality incomplete penetrance; abnormal embryonic tissue morphology; abnormal sensory neuron innervation pattern; abnormal sen…
ENSMUSG00000040610	Tlx3	HD	abnormal breathing pattern; abnormal glutaminergic neuron morphology; abnormal nervous system physiology; abnormal spinal cord interneuron morphology; absent gastric milk in neonates; apnea; cyanosis; neonatal lethality complete penetrance; respiratory distress; respiratory failure; tachypnea
ENSMUSG00000004872	Pax3	HD	abnormal bony labyrinth; abnormal brain ventricle morphology; abnormal cardiac outflow tract development; abnormal coat/hair pigmentation; abnormal common carotid artery morphology; abnormal dermomyotome development; abnormal diaphragm development; abnormal dorsal root ganglion morphology; abnormal embryo morphology; abnormal endolymphatic duct morphology; abnormal hind foot hair pigmentation; ab…
ENSMUSG00000048349	Pou4f1	HD	abnormal cranial ganglia morphology; abnormal dorsal root ganglion morphology; abnormal epithalamus morphology; abnormal hindbrain morphology; abnormal inferior olivary complex morphology; abnormal medulla oblongata morphology; abnormal red nucleus morphology; abnormal stationary movement; abnormal trigeminal ganglion morphology; abnormal trigeminal nerve morphology; abnormal vestibular ganglion …
ENSMUSG00000031688	Pou4f2	HD	abnormal circardian behavior entrainment; abnormal eye electrophysiology; abnormal neuron physiology; abnormal optic nerve innervation; abnormal optic nerve morphology; abnormal retina morphology; abnormal retinal ganglion cell morphology; abnormal retinal nerve fiber layer morphology; abnormal sensory neuron innervation pattern; abnormal superior colliculus morphology; abnormal visual pursuit; d…
ENSMUSG00000033249	Hsf4	Others	cardiovascular system phenotype; decreased heart rate variability; increased circulating serum albumin level; abnormal lens capsule morphology; abnormal lens epithelium morphology; abnormal lens fiber morphology; abnormal lens morphology; cataract; ectopia lentis; hydropic eye lens fibers; microphthalmia; ruptured lens capsule; small lens
ENSMUSG00000028341	Nr4a3	NHR	abnormal axon extension; abnormal axon guidance; abnormal embryonic tissue morphology; abnormal endolymphatic duct morphology; abnormal gastrulation; abnormal gastrulation movements; abnormal hippocampus development; abnormal hippocampus pyramidal cell layer; abnormal semicircular canal morphology; abnormal sulcus ampullaris morphology; abnormal vestibular system physiology; bidirectional circlin…
ENSMUSG00000063972	Nr6a1	NHR	abnormal allantois morphology; abnormal chorioallantoic fusion; abnormal embryo size; abnormal embryo turning; abnormal forebrain development; abnormal heart looping; abnormal heart morphology; abnormal hindbrain development; abnormal midbrain development; abnormal neural tube closure; abnormal neural tube morphology; abnormal optic vesicle formation; abnormal otic vesicle morphology; abnormal pe…
ENSMUSG00000002250	Ppard	NHR	abnormal adipose tissue morphology; abnormal bone ossification; abnormal brain morphology; abnormal circulating protein level; abnormal compact bone morphology; abnormal compact bone volume; abnormal energy expenditure; abnormal epidermis stratum corneum morphology; abnormal extraembryonic tissue morphology; abnormal fat cell morphology; abnormal gonadal fat pad morphology; abnormal hair follicle…
ENSMUSG00000021779	Thrb	NHR	decreased circulating free fatty acid level; decreased circulating glycerol level; decreased hemoglobin content; tremors; abnormal Purkinje cell morphology; abnormal bone mineralization; abnormal bone structure; abnormal cerebellar Purkinje cell layer; abnormal chondrocyte physiology; abnormal circulating hormone level; abnormal cochlea morphology; abnormal cochlear inner hair cell physiology; ab…
ENSMUSG00000026976	Pax8	Others	abnormal Mullerian duct morphology; abnormal action potential; abnormal adenohypophysis morphology; abnormal auditory bulla morphology; abnormal bone remodeling; abnormal bone trabecula morphology; abnormal caput epididymis morphology; abnormal cochlear IHC efferent innervation pattern; abnormal cochlear hair cell morphology; abnormal cochlear hair cell stereociliary bundle morphology; abnormal c…
ENSMUSG00000010175	Prox1	Others	abnormal endocrine pancreas morphology; abnormal eye development; abnormal intestine morphology; abnormal lens development; abnormal lens morphology; abnormal liver development; abnormal lymph circulation; abnormal lymph organ development; abnormal lymphatic vessel morphology; abnormal retina morphology; abnormal suckling behavior; absent horizontal cells; chylothorax; cyanosis; decreased hepatoc…
ENSMUSG00000042320	Prox2	Others	enlarged cecum; abnormal anxiety-related response; no abnormal phenotype detected
ENSMUSG00000058886	Deaf1	Others	abnormal neural tube morphology; abnormal sternocostal joint morphology; cervical vertebral fusion; exencephaly; neonatal lethality incomplete penetrance; open neural tube; rib bifurcation; rib fusion
ENSMUSG00000001911	Nfix	Others	abnormal retina morphology; decreased circulating amylase level; decreased heart rate; decreased neutrophil cell number; hyperactivity; increased circulating alkaline phosphatase level; increased mean platelet volume; abnormal bone mineralization; abnormal brain morphology; abnormal cerebral cortex morphology; abnormal corpus callosum morphology; abnormal cranial suture morphology; abnormal crani…
ENSMUSG00000031681	Smad1	Others	abnormal allantois morphology; abnormal cell morphology; abnormal chorioallantoic fusion; abnormal chorion morphology; abnormal cranial nerve morphology; abnormal embryo development; abnormal embryo turning; abnormal embryonic epiblast morphology; abnormal extraembryonic ectoderm morphology; abnormal extraembryonic tissue morphology; abnormal gastric chief cell morphology; abnormal gastric pariet…
ENSMUSG00000032329	Hmg20a	Others	abnormal embryo size; abnormal facial morphology; abnormal neural tube closure; hyperactivity; preweaning lethality complete penetrance; abnormal locomotor activation
ENSMUSG00000037477	Tbx10	Others	decreased circulating aspartate transaminase level; abnormal bony labyrinth; abnormal crista ampullaris morphology; abnormal ear development; abnormal gait; abnormal inner ear vestibule morphology; abnormal lateral semicircular canal morphology; abnormal postural reflex; abnormal semicircular canal ampulla morphology; abnormal semicircular canal morphology; abnormal superior semicircular canal mo…
ENSMUSG00000027868	Tbx15	Others	abnormal acromion morphology; abnormal basioccipital bone morphology; abnormal cervical atlas morphology; abnormal cervical axis morphology; abnormal cervical vertebrae morphology; abnormal coat/hair pigmentation; abnormal craniofacial morphology; abnormal deltoid tuberosity morphology; abnormal ear position; abnormal foramen magnum morphology; abnormal humerus morphology; abnormal limb bone morp…
ENSMUSG00000032419	Tbx18	Others	abnormal axial skeleton morphology; abnormal cardiovascular development; abnormal chest morphology; abnormal common cardinal vein morphology; abnormal coronary vessel morphology; abnormal dorsal-ventral polarity of the somites; abnormal epicardium morphology; abnormal heart morphology; abnormal kidney morphology; abnormal lumbar vertebrae morphology; abnormal myocardium compact layer morphology; …
ENSMUSG00000030699	Tbx6	Others	abnormal cervical atlas morphology; abnormal cervical vertebrae morphology; abnormal digestive system development; abnormal direction of embryo turning; abnormal direction of heart looping; abnormal intersomitic artery morphology; abnormal intervertebral disk development; abnormal lumbar vertebrae morphology; abnormal mesoderm development; abnormal motile primary cilium morphology; abnormal neura…
ENSMUSG00000037214	Thap1	Others	abnormal chorioallantoic fusion; abnormal cornea morphology; abnormal embryo size; abnormal retinal blood vessel morphology; embryonic lethality prior to tooth bud stage; increased grip strength; preweaning lethality complete penetrance; abnormal axon extension; abnormal cerebellum dentate nucleus morphology; abnormal gait; abnormal grip strength; absent liver; anophthalmia; decreased brain size;…
ENSMUSG00000034333	Zbed4	ZF	abnormal heart morphology; abnormal kidney morphology; abnormal spleen morphology; decreased exploration in new environment; enlarged heart; enlarged kidney; enlarged spleen; preweaning lethality incomplete penetrance
ENSMUSG00000062761	Zfp512	ZF	abnormal behavior; decreased thigmotaxis; hyperactivity; abnormal locomotor activation; abnormal startle reflex
ENSMUSG00000021575	Ahrr	bHLH	abnormal motor learning; abnormal retina morphology; abnormal rod electrophysiology; abnormal sleep behavior; decreased circulating HDL cholesterol level; abnormal bone mineral density; abnormal circulating HDL cholesterol level; decreased incidence of tumors by chemical induction
ENSMUSG00000044243	Bhlha9	bHLH	abnormal brain morphology; hydrocephaly; abnormal interdigital cell death; interdigital webbing; syndactyly
ENSMUSG00000047171	Helt	bHLH	abnormal glutaminergic neuron morphology; abnormal suckling behavior; decreased body weight; limb grasping; loss of GABAergic neurons; postnatal growth retardation; postnatal lethality incomplete penetrance; premature death; seizures; tonic-clonic seizures
ENSMUSG00000020647	Ncoa1	bHLH	abnormal brain morphology; decreased circulating cholesterol level; decreased circulating glucose level; decreased fasting circulating glucose level; decreased total body fat amount; hydrocephaly; hyperactivity; increased bone mineral content; increased lean body mass; abnormal Purkinje cell morphology; abnormal bone mineralization; abnormal bone remodeling; abnormal cerebellar Purkinje cell laye…
ENSMUSG00000005886	Ncoa2	bHLH	increased exploration in new environment; preweaning lethality incomplete penetrance; prolonged ST segment; abnormal Sertoli cell morphology; abnormal epididymis morphology; abnormal reproductive system morphology; abnormal reproductive system physiology; abnormal rete testis morphology; abnormal seminiferous tubule morphology; abnormal spermatid morphology; abnormal testis morphology; decreased …
ENSMUSG00000021010	Npas3	bHLH	increased startle reflex; preweaning lethality complete penetrance; abnormal behavioral response to xenobiotic; abnormal cerebellar foliation; abnormal cerebral aqueduct morphology; abnormal cingulate gyrus morphology; abnormal corpus callosum morphology; abnormal gait; abnormal hippocampus morphology; abnormal lung vasculature morphology; abnormal maternal nurturing; abnormal nest building behav…
ENSMUSG00000045903	Npas4	bHLH	abnormal thymus morphology; abnormal behavior; abnormal neuron morphology; gliosis; hyperactivity; increased anxiety-related response; increased sensitivity to xenobiotic induced morbidity/mortality; increased susceptibility to neuronal excitotoxicity; myoclonus; neuron degeneration; premature death; seizures
ENSMUSG00000019913	Sim1	bHLH	abnormal brown adipose tissue morphology; abnormal diencephalon morphology; abnormal energy homeostasis; abnormal glucose homeostasis; abnormal hypothalamus morphology; abnormal nervous system tract morphology; abnormal neuronal migration; abnormal paraventricular hypothalamic nucleus morphology; abnormal pituicyte morphology; abnormal supraoptic nucleus morphology; abnormal white adipose tissue …
ENSMUSG00000006642	Tcf23	bHLH	decreased total retina thickness
ENSMUSG00000033282	Rpgrip1l	bZIP	hyperplasia; preweaning lethality complete penetrance; abdominal situs ambiguus; abnormal Mullerian duct topology; abnormal accessory nerve morphology; abnormal atrioventricular cushion morphology; abnormal azygos vein topology; abnormal basilar artery morphology; abnormal basioccipital bone morphology; abnormal basisphenoid bone morphology; abnormal bile duct development; abnormal brain vasculat…
ENSMUSG00000071669	Snx29	bZIP	abnormal auditory brainstem response
ENSMUSG00000024532	1700034E13Rik	ZF	abnormal eye morphology; abnormal kidney morphology; abnormal liver morphology; abnormal lymph node morphology; abnormal ovary morphology; abnormal skin morphology; abnormal spleen morphology; abnormal stomach morphology; anophthalmia; enlarged liver; enlarged lymph nodes; enlarged seminal vesicle; enlarged spleen; abnormal circulating alkaline phosphatase level; abnormal circulating aspartate tr…
ENSMUSG00000060301	2610008E11Rik	ZF	decreased freezing behavior
ENSMUSG00000042156	Dzip1	ZF	abnormal cell morphology; abnormal neural tube morphology; abnormal somite development; decreased embryo size; embryonic lethality during organogenesis incomplete penetrance
ENSMUSG00000047013	Fbxo41	ZF	abnormal auditory brainstem response; decreased grip strength; hyperactivity; increased kidney weight; abnormal cerebellar molecular layer; abnormal cerebellum external granule cell layer morphology; abnormal gait; abnormal neuronal migration; ataxia; decreased body weight; decreased brain weight; impaired balance; impaired coordination; limb grasping; postnatal growth retardation; postnatal leth…
ENSMUSG00000072915	Gm12258	ZF	abnormal auditory brainstem response; decreased respiratory quotient; abnormal respiratory quotient
ENSMUSG00000040478	Prdm13	ZF	abnormal spleen morphology; abnormal optokinetic reflex; abnormal retinal inner plexiform layer morphology; abnormal visual contrast sensitivity; decreased amacrine cell number; thin retinal inner nuclear layer; thin retinal inner plexiform layer
ENSMUSG00000035456	Prdm8	ZF	abnormal inspiratory capacity; abnormal uterus morphology; corneal opacity; decreased body weight; decreased caudal vertebrae number; enlarged uterus; increased airway resistance; increased lung tissue damping; abnormal axon guidance; abnormal motor coordination/ balance; absent corpus callosum; absent hippocampal commissure; excessive scratching; skin lesions
ENSMUSG00000049532	Sall2	ZF	exencephaly; no abnormal phenotype detected; open neural tube; perinatal lethality incomplete penetrance
ENSMUSG00000024565	Sall3	ZF	abnormal cranial nerve morphology; abnormal epiglottis morphology; abnormal hypoglossal nerve morphology; abnormal soft palate morphology; abnormal somatic sensory system morphology; abnormal suckling behavior; abnormal tongue morphology; dehydration; impaired righting response; neonatal lethality complete penetrance; weakness
ENSMUSG00000046982	Tshz1	ZF	abnormal arcus anterior morphology; abnormal axial skeleton morphology; abnormal craniofacial bone morphology; abnormal epiglottis morphology; abnormal external auditory canal morphology; abnormal malleus morphology; abnormal middle ear morphology; abnormal olfactory bulb granule cell layer morphology; abnormal palatal shelf fusion at midline; abnormal palate morphology; abnormal sternocostal joi…
ENSMUSG00000021217	Tshz3	ZF	abnormal kidney pelvis morphology; abnormal ureter development; abnormal ureter morphology; abnormal ureter smooth muscle morphology; atelectasis; dilated ureter; hydronephrosis; hydroureter; hyporesponsive to tactile stimuli; impaired ureteric peristalsis; neonatal lethality complete penetrance; no spontaneous movement; respiratory distress
ENSMUSG00000018750	Zbtb4	ZF	abnormal lens morphology; abnormal sleep behavior; decreased body length; fused cornea and lens; persistence of hyaloid vascular system; abnormal body length
ENSMUSG00000037638	Zbtb42	ZF	decreased prepulse inhibition; enlarged lymph nodes
ENSMUSG00000049657	Zbtb5	ZF	abnormal optic disk morphology; abnormal retinal inner nuclear layer morphology; abnormal retinal outer nuclear layer morphology; anophthalmia; decreased total retina thickness; increased startle reflex; narrow eye opening
ENSMUSG00000057894	Zfp329	ZF	abnormal optic disk morphology; abnormal retina morphology; abnormal sinus arrhythmia; decreased grip strength; abnormal grip strength
ENSMUSG00000017667	Zfp334	ZF	decreased exploration in new environment; increased vertical activity; abnormal locomotor activation
ENSMUSG00000070902	Zfp352	ZF	abnormal retinal outer nuclear layer morphology
ENSMUSG00000050919	Zfp366	ZF	hydronephrosis; micrognathia; microphthalmia; overriding aortic valve; short snout; syndactyly; thymus hypoplasia; ventricular septal defect
ENSMUSG00000047036	Zfp445	ZF	abnormal brain morphology; decreased circulating insulin level; decreased grip strength; hypoactivity; preweaning lethality incomplete penetrance
ENSMUSG00000043456	Zfp536	ZF	abnormal embryo size; decreased blood urea nitrogen level; decreased vertical activity; increased circulating chloride level; increased hemoglobin content; increased mean corpuscular hemoglobin concentration; increased prepulse inhibition; preweaning lethality complete penetrance; respiratory system phenotype; abnormal locomotor activation; abnormal mean corpuscular hemoglobin concentration
ENSMUSG00000074221	Zfp568	ZF	abnormal anterior definitive endoderm morphology; abnormal chorion morphology; abnormal digestive system development; abnormal embryo development; abnormal extraembryonic endoderm formation; abnormal extraembryonic mesoderm development; abnormal extraembryonic tissue morphology; abnormal extraembryonic tissue physiology; abnormal germ layer development; abnormal lateral plate mesoderm morphology;…
ENSMUSG00000039789	Zfp597	ZF	iris synechia; abnormal auditory brainstem response; abnormal cingulate cortex morphology; abnormal dorsal striatum morphology; abnormal oligodendrocyte morphology; ataxia; brain vacuoles; embryonic growth arrest; embryonic lethality complete penetrance; neurodegeneration; seizures; spongiform encephalopathy
ENSMUSG00000045639	Zfp629	ZF	decreased freezing behavior; decreased lean body mass; hyperactivity; impaired cued conditioning behavior; increased exploration in new environment; increased prepulse inhibition; increased total body fat amount; increased vertical activity; abnormal cued conditioning behavior; abnormal freezing behavior; abnormal locomotor activation; increased startle reflex
ENSMUSG00000048921	Zfp689	ZF	abnormal sleep behavior; impaired righting response; preweaning lethality incomplete penetrance
ENSMUSG00000012640	Zfp715	ZF	abnormal coping response; decreased circulating cholesterol level; increased circulating cholesterol level
ENSMUSG00000030469	Zfp719	ZF	abnormal auditory brainstem response; absent pinna reflex; increased erythrocyte cell number
ENSMUSG00000024298	Zfp871	ZF	abnormal embryo size; abnormal placenta morphology; abnormal placenta size; abnormal retinal inner nuclear layer morphology; decreased total retina thickness; increased exploration in new environment; preweaning lethality complete penetrance
ENSMUSG00000059897	Zfp930	ZF	abnormal optic disk morphology; decreased startle reflex; persistence of hyaloid vascular system
ENSMUSG00000032425	Zfp949	ZF	abnormal embryo development; abnormal neural plate morphology; decreased cell proliferation; decreased embryo size; embryonic growth retardation; embryonic lethality between somite formation and embryo turning incomplete penetrance; embryonic lethality during organogenesis complete penetrance; embryonic lethality incomplete penetrance; failure of initiation of embryo turning; increased embryonic …
ENSMUSG00000063488	Zkscan7	ZF	abnormal eye morphology; abnormal lymph node morphology; abnormal spleen morphology; anophthalmia; enlarged lymph nodes; enlarged spleen; decreased circulating cholesterol level; decreased circulating insulin level
ENSMUSG00000037017	Zscan21	ZF	abnormal auditory brainstem response; abnormal retinal inner nuclear layer morphology; abnormal skin coloration; decreased total body fat amount; decreased total retina thickness; female infertility; increased lean body mass; male infertility; preweaning lethality incomplete penetrance; no abnormal phenotype detected
ENSMUSG00000058028	Zscan5b	ZF	abnormal gait; decreased anxiety-related response; increased chromosomal stability
ENSMUSG00000039089	L3mbtl3	ZF	abnormal behavior; abnormal craniofacial morphology; abnormal embryo size; abnormal head shape; abnormal heart morphology; abnormal limb morphology; abnormal skin coloration; abnormal skin morphology; hyperactivity; increased thigmotaxis; pallor; preweaning lethality complete penetrance; abnormal definitive hematopoiesis; anemia; perinatal lethality complete penetrance
ENSMUSG00000014592	Camta1	Others	abnormal posture; ataxia; decreased body size; postnatal lethality complete penetrance
ENSMUSG00000006307	Kmt2b	Others	abnormal coat/hair pigmentation; decreased erythrocyte cell number; increased circulating alkaline phosphatase level; increased mean corpuscular hemoglobin; abnormal DNA methylation; abnormal embryo development; abnormal embryo turning; abnormal head morphology; abnormal heart looping; abnormal hepatocyte morphology; abnormal somite development; decreased epididymal fat pad weight; decreased insu…
ENSMUSG00000024561	Mbd1	Others	decreased bone mineral content; decreased bone mineral density; female infertility; increased circulating HDL cholesterol level; increased circulating LDL cholesterol level; increased circulating cholesterol level; increased mean corpuscular hemoglobin; lordosis; vertebral transformation; abnormal bone mineral density; abnormal bone mineralization; abnormal circulating HDL cholesterol level; abno…
ENSMUSG00000036180	Gatad2a	Others	abnormal embryo turning; abnormal neural fold morphology; abnormal vitelline vasculature morphology; decreased embryo size; embryonic growth arrest; embryonic lethality during organogenesis complete penetrance; incomplete rostral neuropore closure
ENSMUSG00000037188	Grhl3	Others	abnormal eye morphology; abnormal locomotor activation; abnormal retina morphology; decreased IgE level; decreased blood urea nitrogen level; decreased circulating alkaline phosphatase level; decreased circulating triglyceride level; increased circulating amylase level; increased circulating calcium level; increased circulating glucose level; abnormal brain development; abnormal corneocyte envelo…
ENSMUSG00000051149	Adnp	HD	abnormal embryonic tissue morphology; embryonic lethality between somite formation and embryo turning complete penetrance; incomplete rostral neuropore closure
ENSMUSG00000053950	Adnp2	HD	abnormal bone structure; abnormal liver morphology; abnormal lung morphology; abnormal uterus morphology; decreased body length; decreased bone mineral content; decreased bone mineral density; decreased circulating serum albumin level; decreased circulating total protein level; decreased exploration in new environment; decreased prepulse inhibition; hypoplasia; improved glucose tolerance; increas…
ENSMUSG00000035877	Zhx3	HD	abnormal behavior; decreased thigmotaxis; decreased total body fat amount; eye hemorrhage; hyperactivity; improved glucose tolerance; increased body length; increased bone mineral density; increased lean body mass; long tibia; preweaning lethality incomplete penetrance; abnormal body length; abnormal bone mineral density; abnormal tibia morphology
ENSMUSG00000068036	Afdn	Others	abnormal embryo turning; abnormal heart morphology; abnormal hindbrain development; abnormal limb bud morphology; abnormal neural tube closure; abnormal neural tube morphology; abnormal optic vesicle formation; abnormal spleen morphology; abnormal uterus morphology; decreased prepulse inhibition; preweaning lethality complete penetrance; small spleen; abnormal amniotic cavity morphology; abnormal…
ENSMUSG00000030322	Mbd4	Others	abnormal DNA methylation; abnormal abdominal wall morphology; abnormal cell cycle checkpoint function; abnormal cell morphology; abnormal cell physiology; abnormal direction of heart looping; abnormal eye development; abnormal head morphology; abnormal left-right axis patterning; abnormal limb development; abnormal neural tube morphology; abnormal pharyngeal arch development; abnormal spinal cord…
ENSMUSG00000049038	Mterf2	Others	abnormal cellular respiration; abnormal mitochondrial ATP synthesis coupled electron transport; abnormal spatial reference memory; abnormal tricarboxylic acid cycle; decreased body weight; impaired exercise endurance; increased mitochondria number; increased mitochondria size; increased mitochondrial DNA content; muscle weakness
ENSMUSG00000042508	Dmtf1	Others	abnormal T cell physiology; abnormal male reproductive system morphology; abnormal renal/urinary system morphology; absent gastric milk in neonates; decreased birth body size; decreased thymocyte number; dilated seminal vesicles; distended urinary bladder; increased incidence of induced tumors; increased tumor incidence; limb grasping; postnatal growth retardation; postnatal lethality incomplete …
ENSMUSG00000062627	Mysm1	Others	abnormal behavior; abnormal coat/ hair morphology; abnormal coat/hair pigmentation; abnormal cranium morphology; abnormal femur morphology; abnormal gait; abnormal pelvic girdle bone morphology; abnormal response to new environment; abnormal rib morphology; abnormal startle reflex; abnormal tail morphology; abnormal vertebrae morphology; abnormal vertebral arch morphology; abnormal vocalization; …
