# Supplementary material for: Joint actions of diverse transcription factor families establish neuron-type identities and promote enhancer selectivity
Source: HighWire-hosted journal article supplement (doi:10.1101/gr.275623.121), 2022-01-24
Supplement: Supplemental_Table_S7.xlsx [file Supplemental_Table_S7.xlsx]

## Sheet: DA
WormBase_ID	gene_name
WBGene00000035	ace-1
WBGene00044330	alr-1
WBGene00022815	asic-1
WBGene00020368	ast-1
WBGene00021059	atat-2
WBGene00000239	bas-1
WBGene00007374	C06C3.3
WBGene00015619	C08G9.1
WBGene00000295	cat-1
WBGene00000296	cat-2
WBGene00000298	cat-4
WBGene00000367	cca-1
WBGene00000463	ceh-43
WBGene00000934	dat-1
WBGene00018681	denn-4
WBGene00008438	DH11.5
WBGene00000995	die-1
WBGene00001053	dop-2
WBGene00013028	efhc-1
WBGene00001184	egl-15
WBGene00017297	F09E10.7
WBGene00008760	F13E9.11
WBGene00009500	F36H2.3
WBGene00018514	F46G11.1
WBGene00009949	F53A2.1
WBGene00019067	F58H7.1
WBGene00010335	F59F3.6
WBGene00001455	flp-12
WBGene00011586	flp-33
WBGene00001490	frm-3
WBGene00021238	gap-3
WBGene00001519	gar-3
WBGene00001587	ggr-2
WBGene00001630	gly-5
WBGene00019180	H10D18.5
WBGene00001898	his-24
WBGene00001987	hot-2
WBGene00021353	iglr-3
WBGene00002123	inx-1
WBGene00019618	K10C2.2
WBGene00003002	lin-13
WBGene00003024	lin-39
WBGene00003072	lrp-2
WBGene00003112	mab-21
WBGene00019347	mbl-1
WBGene00019875	mca-2
WBGene00003175	mec-12
WBGene00003232	mgl-1
WBGene00003243	mig-10
WBGene00003404	mpz-1
WBGene00013882	msa-1
WBGene00003657	nhr-67
WBGene00003748	nlp-10
WBGene00003754	nlp-16
WBGene00003907	paf-2
WBGene00011398	qdpr-1
WBGene00019902	R05G6.10
WBGene00011217	R10E11.5
WBGene00045336	R11D1.12
WBGene00020010	R11G1.1
WBGene00004369	rig-1
WBGene00008819	shw-1
WBGene00004892	sms-1
WBGene00004894	sms-3
WBGene00020209	T04C9.1
WBGene00011755	T13H5.1
WBGene00020561	T19C3.3
WBGene00006528	tba-1
WBGene00006535	tba-9
WBGene00006537	tbb-2
WBGene00006616	trp-4
WBGene00006436	ttn-1
WBGene00006668	twk-13
WBGene00006657	twk-2
WBGene00006658	twk-3
WBGene00006830	unc-103
WBGene00006777	unc-41
WBGene00006809	unc-77
WBGene00006812	unc-80
WBGene00012289	W05H12.1
WBGene00022392	Y97E10AL.1
WBGene00022633	ZC581.3
WBGene00022786	ZK652.8
WBGene00206488	ZK757.10
WBGene00014074	ZK757.2
WBGene00006999	zyx-1

## Sheet: ASE
WormBase_ID	gene_name
WBGene00000102	akt-1
WBGene00016415	ampd-1
WBGene00000149	apl-1
WBGene00015117	B0294.1
WBGene00018755	bcmo-2
WBGene00009512	bigr-1
WBGene00195081	C04F6.7
WBGene00007487	C09G1.5
WBGene00016097	C25E10.8
WBGene00007816	C30F2.2
WBGene00020251	camt-1
WBGene00000403	casy-1
WBGene00018037	chtl-1
WBGene00000793	crh-1
WBGene00013709	csnk-1
WBGene00000912	daf-16
WBGene00000898	daf-2
WBGene00000953	del-2
WBGene00010262	droe-4
WBGene00008454	E02A10.4
WBGene00017236	F08B4.4
WBGene00008622	F09C8.2
WBGene00017675	F21F3.6
WBGene00017858	F27C1.11
WBGene00009375	F34D10.6
WBGene00010200	F57C7.4
WBGene00010236	F58B4.3
WBGene00001449	flp-6
WBGene00001528	gcy-1
WBGene00001540	gcy-14
WBGene00001542	gcy-17
WBGene00001544	gcy-19
WBGene00001545	gcy-20
WBGene00001547	gcy-22
WBGene00001530	gcy-3
WBGene00001531	gcy-4
WBGene00001532	gcy-5
WBGene00001533	gcy-6
WBGene00001534	gcy-7
WBGene00001841	hen-1
WBGene00002105	ins-22
WBGene00002109	ins-26
WBGene00002163	ist-1
WBGene00002173	itr-1
WBGene00017571	jmjd-3.1
WBGene00019592	K09F6.9
WBGene00002988	lim-6
WBGene00018369	mig-39
WBGene00003413	mrp-7
WBGene00003695	nhr-105
WBGene00003620	nhr-21
WBGene00018117	nlp-47
WBGene00010627	nol-56
WBGene00021304	nphp-2
WBGene00013187	npr-34
WBGene00007799	nrx-1
WBGene00015735	pdfr-1
WBGene00003969	pef-1
WBGene00017766	peli-1
WBGene00004036	plc-1
WBGene00019831	R02F2.1
WBGene00011060	R06C1.6
WBGene00011223	R10H10.4
WBGene00018869	rfip-1
WBGene00023417	swm-1
WBGene00011393	T03D8.6
WBGene00004053	tank-1
WBGene00019466	tos-1
WBGene00008341	ttr-44
WBGene00017157	tyra-2
WBGene00011453	ugt-56
WBGene00021005	ule-1
WBGene00022313	Y77E11A.12
WBGene00022382	Y94H6A.10
WBGene00022664	ZK121.2

## Sheet: GABAergic
WormBase_ID	gene_name
WBGene00000004	aat-3
WBGene00021927	abhd-14
WBGene00018880	acc-3
WBGene00000053	acr-14
WBGene00000048	acr-9
WBGene00000065	act-3
WBGene00000070	acy-3
WBGene00000071	acy-4
WBGene00000086	aex-3
WBGene00018877	aman-1
WBGene00000162	apd-3
WBGene00019748	atg-2
WBGene00000224	atgp-1
WBGene00044615	B0252.8
WBGene00000238	bar-1
WBGene00009945	bath-38
WBGene00007299	C04F12.5
WBGene00007305	C04G2.2
WBGene00015539	C06E7.2
WBGene00007486	C09G1.4
WBGene00015729	C13A10.2
WBGene00007583	C14B4.2
WBGene00195143	C16D2.2
WBGene00015980	C18G1.1
WBGene00016135	C26B9.6
WBGene00016311	C32D5.3
WBGene00007898	C33D9.3
WBGene00007921	C34C12.2
WBGene00044299	C42D8.9
WBGene00008110	C46C2.2
WBGene00000280	cah-2
WBGene00000396	cdh-4
WBGene00000437	ceh-13
WBGene00000476	cfi-1
WBGene00018468	cla-1
WBGene00000527	cle-1
WBGene00010796	clip-1
WBGene00016879	cnnm-1
WBGene00012073	cpd-2
WBGene00019357	cpg-8
WBGene00022271	cpx-1
WBGene00044300	D1022.9
WBGene00017040	D1079.1
WBGene00000950	deg-1
WBGene00019521	dmd-7
WBGene00001082	dpy-23
WBGene00022861	dve-1
WBGene00001130	dyn-1
WBGene00017129	E04F6.10
WBGene00001337	ears-1
WBGene00001147	eat-18
WBGene00001224	ehs-1
WBGene00008513	F02A9.1
WBGene00008555	F07C6.4
WBGene00017447	F14B8.5
WBGene00017477	F15A8.4
WBGene00017698	F22B7.9
WBGene00009177	F26H9.5
WBGene00017900	F28E10.1
WBGene00009531	F38B2.4
WBGene00009722	F45D3.2
WBGene00009803	F47B8.2
WBGene00018569	F47F2.1
WBGene00009930	F52D10.2
WBGene00018716	F52H2.4
WBGene00018734	F53A10.2
WBGene00010061	F54E12.2
WBGene00010109	F55C10.5
WBGene00019055	F58F9.1
WBGene00001385	far-1
WBGene00001458	flp-15
WBGene00010453	fozi-1
WBGene00001488	frm-1
WBGene00001495	frm-9
WBGene00018191	frpr-7
WBGene00016215	glb-10
WBGene00009271	glna-3
WBGene00001631	gly-6
WBGene00001650	gon-1
WBGene00001651	gon-2
WBGene00014101	gopc-1
WBGene00019200	H14E04.3
WBGene00001980	hmr-1
WBGene00016704	hosl-1
WBGene00001986	hot-1
WBGene00044484	hot-9
WBGene00002010	hsp-6
WBGene00016958	ilys-4
WBGene00002179	jph-1
WBGene00010449	K01A11.1
WBGene00010553	K04C1.3
WBGene00019525	K08D9.4
WBGene00020952	kel-8
WBGene00002217	klp-4
WBGene00002239	ksr-1
WBGene00002974	lev-1
WBGene00002977	lev-10
WBGene00022500	lfi-1
WBGene00020605	lgc-50
WBGene00015412	lgc-9
WBGene00003007	lin-18
WBGene00002991	lin-2
WBGene00003056	lon-2
WBGene00009700	lurp-1
WBGene00009958	madd-4
WBGene00003143	max-1
WBGene00008806	mboa-7
WBGene00010834	mct-3
WBGene00015676	mct-6
WBGene00020051	mfsd-6
WBGene00003238	mig-1
WBGene00003386	mod-1
WBGene00017299	molo-1
WBGene00003397	mom-5
WBGene00003516	nab-1
WBGene00003519	nac-3
WBGene00003569	ncx-4
WBGene00003578	ndx-1
WBGene00003625	nhr-31
WBGene00003772	nlr-1
WBGene00003778	nnt-1
WBGene00011647	noca-1
WBGene00003818	nsf-1
WBGene00003859	oig-1
WBGene00003916	par-1
WBGene00004087	ppk-1
WBGene00004202	pry-1
WBGene00004213	ptp-1
WBGene00011221	R10E12.2
WBGene00004267	rab-3
WBGene00004310	ras-1
WBGene00004347	rgs-4
WBGene00007860	rilp-1
WBGene00004507	rpy-1
WBGene00020572	rund-1
WBGene00015437	scrm-3
WBGene00007664	seb-3
WBGene00004774	sem-5
WBGene00010421	slc-36.4
WBGene00004897	snb-1
WBGene00004912	sng-1
WBGene00004913	snn-1
WBGene00004921	snt-1
WBGene00006368	sym-3
WBGene00011507	T05H10.1
WBGene00020294	T06F4.1
WBGene00044566	T06F4.3
WBGene00011681	T10B10.4
WBGene00020581	T19D12.6
WBGene00011990	T24D5.2
WBGene00020861	T27E4.1
WBGene00012125	T28D6.5
WBGene00006604	tra-1
WBGene00010873	trpa-2
WBGene00006633	tsp-7
WBGene00007304	ttr-39
WBGene00006676	twk-23
WBGene00006693	twk-43
WBGene00006696	twk-46
WBGene00006662	twk-7
WBGene00006727	ubq-1
WBGene00006757	unc-18
WBGene00006762	unc-25
WBGene00006765	unc-29
WBGene00006766	unc-30
WBGene00006782	unc-46
WBGene00006783	unc-47
WBGene00006745	unc-5
WBGene00006790	unc-55
WBGene00006791	unc-57
WBGene00006796	unc-62
WBGene00006798	unc-64
WBGene00006803	unc-70
WBGene00006808	unc-76
WBGene00006874	vab-8
WBGene00006921	vha-12
WBGene00021952	vha-19
WBGene00006917	vha-8
WBGene00012326	W07E11.1
WBGene00006942	wrk-1
WBGene00012471	Y17G7B.20
WBGene00021316	Y32H12A.8
WBGene00021388	Y37F4.7
WBGene00012598	Y38E10A.20
WBGene00012669	Y39B6A.7
WBGene00021497	Y40C5A.4
WBGene00012853	Y44A6D.2
WBGene00013171	Y53F4B.25
WBGene00013195	Y54E2A.10
WBGene00013416	Y64G10A.7
WBGene00235279	Y67D8C.22
WBGene00022073	Y67D8C.9
WBGene00013666	yrs-2
WBGene00022519	ZC123.4
WBGene00014210	ZK1067.4
WBGene00014233	ZK1128.7

## Sheet: RIA
WormBase_ID	gene_name
WBGene00010138	anoh-1
WBGene00000233	avr-15
WBGene00235325	C08D8.7
WBGene00016801	C50C3.5
WBGene00016809	C50D2.6
WBGene00016988	CD4.1
WBGene00016384	cdgs-1
WBGene00019994	cdh-1
WBGene00000453	ceh-32
WBGene00000433	ceh-8
WBGene00008432	D2085.7
WBGene00000958	dgk-1
WBGene00001116	dyc-1
WBGene00001194	egl-27
WBGene00001202	egl-36
WBGene00001177	egl-8
WBGene00011884	enol-1
WBGene00008876	F16A11.1
WBGene00017657	F21C10.7
WBGene00009315	F32B4.5
WBGene00017983	F32D1.3
WBGene00009623	F41E7.7
WBGene00018879	F55D10.4
WBGene00001396	fat-4
WBGene00021972	glb-31
WBGene00001613	glr-2
WBGene00001614	glr-3
WBGene00001617	glr-6
WBGene00020146	got-1.2
WBGene00001759	gst-11
WBGene00022418	igcm-4
WBGene00012148	inos-1
WBGene00002175	jac-1
WBGene00019352	K03A1.4
WBGene00019381	K04C2.3
WBGene00002989	lim-7
WBGene00003030	lin-45
WBGene00021152	mgl-3
WBGene00003237	mif-4
WBGene00003407	mrp-1
WBGene00003423	msi-1
WBGene00009730	myo-6
WBGene00020136	nlp-45
WBGene00007635	npr-4
WBGene00021043	pck-1
WBGene00003978	pes-4
WBGene00010813	pitp-1
WBGene00011231	R11A5.3
WBGene00004350	rgs-7
WBGene00004776	ser-1
WBGene00010868	somi-1
WBGene00006363	syd-1
WBGene00006364	syd-2
WBGene00020389	T10B5.3
WBGene00018639	tbc-16
WBGene00006584	tni-1
WBGene00006508	tns-1
WBGene00008366	tpra-1
WBGene00006750	unc-10
WBGene00006772	unc-36
WBGene00006784	unc-49
WBGene00006815	unc-83
WBGene00014848	VM106R.1
WBGene00021272	Y23H5B.1
WBGene00012798	Y43F4A.3
WBGene00012989	Y48C3A.5
WBGene00021984	Y59C2A.1
WBGene00022014	Y61A9LA.1
WBGene00022391	Y95B8A.12
WBGene00045248	ZK180.7
WBGene00022718	ZK370.4

## Sheet: SDQ.ALN.PLN
WormBase_ID	gene_name
WBGene00000096	ahr-1
WBGene00000170	aqp-2
WBGene00000175	aqp-7
WBGene00012763	atln-2
WBGene00015263	B0563.6
WBGene00000237	bam-2
WBGene00007607	C15C8.5
WBGene00007944	C34F6.10
WBGene00007976	C36B1.9
WBGene00016845	C50F7.5
WBGene00000286	cal-2
WBGene00010351	cbd-1
WBGene00000421	ced-7
WBGene00001190	egl-23
WBGene00009304	eva-1
WBGene00009389	F35B12.10
WBGene00009558	F39B2.8
WBGene00009779	F46C5.2
WBGene00010073	F54F12.2
WBGene00019975	flp-34
WBGene00001484	fox-1
WBGene00020586	frpr-18
WBGene00001555	gcy-35
WBGene00001560	gei-3
WBGene00010356	H03A11.1
WBGene00019150	H04J21.1
WBGene00019199	H14E04.2
WBGene00009738	hecw-1
WBGene00011904	hlb-1
WBGene00020130	igcm-2
WBGene00002100	ins-17
WBGene00019593	K09F6.10
WBGene00002243	lad-2
WBGene00002881	let-756
WBGene00006407	lim-9
WBGene00003086	lst-4
WBGene00003229	mex-3
WBGene00009439	mlcd-1
WBGene00020447	mob-3
WBGene00006437	mrck-1
WBGene00008999	myrf-2
WBGene00003558	nca-2
WBGene00018472	nep-16
WBGene00003758	nlp-20
WBGene00003878	pept-3
WBGene00004047	plx-1
WBGene00004060	pmp-3
WBGene00004256	pxn-1
WBGene00019935	R07E4.1
WBGene00020125	R173.3
WBGene00006468	rhgf-1
WBGene00019698	riok-1
WBGene00004732	sax-7
WBGene00008927	snx-17
WBGene00004951	spc-1
WBGene00006064	sto-2
WBGene00006306	sue-1
WBGene00012759	sup-1
WBGene00020234	T05A12.3
WBGene00020530	T15B12.1
WBGene00020554	T19A5.3
WBGene00015704	tiam-1
WBGene00010784	twk-48
WBGene00019904	twk-49
WBGene00006705	ubc-8
WBGene00006831	unc-104
WBGene00006769	unc-33
WBGene00006811	unc-79
WBGene00006814	unc-82
WBGene00077669	Y38H6A.5
WBGene00012796	Y43F4A.1
WBGene00006970	zag-1
WBGene00013898	ZC443.3
WBGene00022635	ZC581.9
WBGene00006975	zfp-1
WBGene00013959	ZK265.7

## Sheet: Touch receptor
WormBase_ID	gene_name
WBGene00000020	abt-2
WBGene00010275	acc-1
WBGene00008802	acp-2
WBGene00000062	acr-23
WBGene00019726	bris-1
WBGene00007268	C03A3.3
WBGene00015671	C10B5.3
WBGene00016431	C35A11.4
WBGene00016663	C45E1.4
WBGene00016738	C47D2.1
WBGene00016751	C48E7.6
WBGene00016817	C50E3.6
WBGene00009532	ccch-1
WBGene00000377	cct-1
WBGene00000378	cct-2
WBGene00018782	cct-3
WBGene00000379	cct-4
WBGene00000380	cct-5
WBGene00000381	cct-6
WBGene00021934	cct-8
WBGene00000441	ceh-18
WBGene00011923	chhy-1
WBGene00013847	cls-3
WBGene00012354	cox-4
WBGene00019074	cpd-1
WBGene00006441	cpna-4
WBGene00016162	crh-2
WBGene00000802	crt-1
WBGene00021237	crtc-1
WBGene00000832	ctn-1
WBGene00007653	cysl-1
WBGene00000900	daf-4
WBGene00019428	dgk-5
WBGene00000998	dig-1
WBGene00001089	dre-1
WBGene00008450	E01G6.2
WBGene00008453	E02A10.3
WBGene00001135	eat-4
WBGene00001137	eat-6
WBGene00001179	egl-10
WBGene00021281	ell-1
WBGene00001248	elp-1
WBGene00008498	F01D5.8
WBGene00017194	F07C3.3
WBGene00017433	F13H6.5
WBGene00008800	F14E5.2
WBGene00017597	F19C7.8
WBGene00017637	F20D6.8
WBGene00017653	F21C10.3
WBGene00017663	F21D12.3
WBGene00009426	F35E12.2
WBGene00009482	F36G3.1
WBGene00018338	F42A9.9
WBGene00009729	F45E10.2
WBGene00009969	F53B7.7
WBGene00009975	F53C11.5
WBGene00018837	F54G2.1
WBGene00010290	F58H1.7
WBGene00019128	F59G1.4
WBGene00001463	flp-20
WBGene00001451	flp-8
WBGene00019445	frpr-12
WBGene00001512	gab-1
WBGene00001551	gcy-31
WBGene00012178	glb-27
WBGene00007389	glb-3
WBGene00001637	gly-12
WBGene00010350	H01G02.3
WBGene00001853	hil-2
WBGene00002016	hsp-16.2
WBGene00002018	hsp-16.41
WBGene00002007	hsp-3
WBGene00002008	hsp-4
WBGene00002036	hum-2
WBGene00019435	K06A9.1
WBGene00019511	K08A2.1
WBGene00002219	klp-7
WBGene00002263	lea-1
WBGene00017314	lgc-39
WBGene00009727	lips-1
WBGene00003048	lit-1
WBGene00001803	lite-1
WBGene00045419	lsy-12
WBGene00003089	ltd-1
WBGene00077521	maf-1
WBGene00003165	mec-1
WBGene00003174	mec-10
WBGene00003176	mec-14
WBGene00003178	mec-17
WBGene00003179	mec-18
WBGene00008216	mec-19
WBGene00003166	mec-2
WBGene00003167	mec-3
WBGene00003168	mec-4
WBGene00003171	mec-7
WBGene00003172	mec-8
WBGene00003173	mec-9
WBGene00011259	miz-1
WBGene00013869	mlck-1
WBGene00003471	mtd-1
WBGene00010700	nipi-3
WBGene00010117	nkb-3
WBGene00018298	nlp-50
WBGene00003745	nlp-7
WBGene00020727	npr-21
WBGene00021983	npr-5
WBGene00007260	olrn-1
WBGene00008936	papl-1
WBGene00011146	pde-2
WBGene00020112	pfd-5
WBGene00010775	poml-1
WBGene00004131	pqn-44
WBGene00004212	ptl-1
WBGene00004220	ptr-5
WBGene00010971	R01E6.7
WBGene00019882	R05D3.9
WBGene00004276	rab-14
WBGene00021811	ral-1
WBGene00015303	rga-6
WBGene00004364	ric-4
WBGene00011352	rskn-1
WBGene00022240	shl-1
WBGene00004922	snt-2
WBGene00004926	snt-6
WBGene00011745	sre-4
WBGene00005641	sro-1
WBGene00006342	sup-37
WBGene00006462	svh-5
WBGene00020229	T05A8.3
WBGene00020301	T07D1.2
WBGene00020302	T07D1.3
WBGene00045340	T10G3.8
WBGene00020426	T10H10.2
WBGene00011854	T20B3.14
WBGene00011864	T20F10.2
WBGene00020726	T23C6.4
WBGene00020735	T23F2.2
WBGene00012070	T26H5.8
WBGene00012117	T28B11.1
WBGene00044077	tag-232
WBGene00009987	tbcb-1
WBGene00006771	tln-1
WBGene00006594	tom-1
WBGene00006665	twk-10
WBGene00006702	ubc-3
WBGene00010697	uda-1
WBGene00011238	ugt-59
WBGene00006752	unc-13
WBGene00006761	unc-24
WBGene00006780	unc-44
WBGene00006801	unc-68
WBGene00006747	unc-7
WBGene00006882	vab-19
WBGene00006923	vhp-1
WBGene00012197	W02B8.1
WBGene00022454	Y110A7A.2
WBGene00013819	Y116F11A.6
WBGene00022472	Y119C1B.6
WBGene00021309	Y32G9B.1
WBGene00021362	Y37E11AL.f
WBGene00013098	Y51H4A.1
WBGene00021800	Y53G8AL.2
WBGene00013212	Y54G11A.1
WBGene00235256	Y54G11A.19
WBGene00022538	ZC190.4
WBGene00013859	ZC247.1
WBGene00021305	zig-11
WBGene00044677	ZK353.10

## Sheet: Pancilia
WormBase_ID	gene_name
WBGene00000036	ace-2
WBGene00010138	anoh-1
WBGene00013272	aqp-12
WBGene00021349	arl-13
WBGene00000188	arl-3
WBGene00000193	arl-6
WBGene00020205	arrd-1
WBGene00014159	arrd-4
WBGene00009579	arrd-6
WBGene00015027	B0207.2
WBGene00015053	B0222.1
WBGene00000241	bbs-1
WBGene00000242	bbs-2
WBGene00043992	bbs-4
WBGene00010974	bbs-5
WBGene00000244	bbs-8
WBGene00016744	bbs-9
WBGene00000262	bra-1
WBGene00015309	C01G5.7
WBGene00007253	C01H6.3
WBGene00015328	C02B10.3
WBGene00007269	C03C10.2
WBGene00007271	C03C10.5
WBGene00007286	C04A11.2
WBGene00007349	C05G5.3
WBGene00015511	C06A6.7
WBGene00015527	C06E2.1
WBGene00015750	C14A11.5
WBGene00007595	C15A7.2
WBGene00007629	C16C10.9
WBGene00015883	C17B7.9
WBGene00007641	C17E4.1
WBGene00219310	C17E4.19
WBGene00007642	C17E4.2
WBGene00015922	C17H11.2
WBGene00044232	C18D11.7
WBGene00016016	C23G10.10
WBGene00007751	C26G2.2
WBGene00044387	C27A2.8
WBGene00044238	C30H6.12
WBGene00016293	C31H2.3
WBGene00007862	C32C4.1
WBGene00007883	C33A12.4
WBGene00007939	C34F6.5
WBGene00016448	C35D10.12
WBGene00016454	C35E7.2
WBGene00016532	C39D10.5
WBGene00008070	C43D7.8
WBGene00016619	C43H6.6
WBGene00016633	C44B11.1
WBGene00008168	C48B4.3
WBGene00016931	C54G6.2
WBGene00016972	C56E6.4
WBGene00008348	C56G7.3
WBGene00021643	ccep-290
WBGene00012779	cdkl-1
WBGene00021913	cec-8
WBGene00000457	ceh-36
WBGene00007416	ceh-57
WBGene00011069	ceh-62
WBGene00010995	ceh-90
WBGene00022435	cfap-36
WBGene00018051	che-10
WBGene00000490	che-11
WBGene00000491	che-12
WBGene00000492	che-13
WBGene00000484	che-2
WBGene00000485	che-3
WBGene00000488	che-7
WBGene00000510	cka-2
WBGene00015580	cls-1
WBGene00000553	cmk-1
WBGene00022295	cng-2
WBGene00016879	cnnm-1
WBGene00000584	cog-1
WBGene00021950	cutl-26
WBGene00000906	daf-10
WBGene00000907	daf-11
WBGene00000914	daf-19
WBGene00000950	deg-1
WBGene00000953	del-2
WBGene00009144	del-3
WBGene00000958	dgk-1
WBGene00000960	dgk-3
WBGene00019428	dgk-5
WBGene00020694	dhhc-11
WBGene00017326	dmd-5
WBGene00022060	dmd-9
WBGene00001117	dyf-1
WBGene00001127	dyf-11
WBGene00001129	dyf-13
WBGene00012673	dyf-17
WBGene00010349	dyf-18
WBGene00012826	dyf-19
WBGene00001118	dyf-2
WBGene00001119	dyf-3
WBGene00001121	dyf-5
WBGene00001122	dyf-6
WBGene00001123	dyf-7
WBGene00017014	dylt-2
WBGene00008463	E02H4.5
WBGene00001171	egl-2
WBGene00001207	egl-43
WBGene00010730	ensa-1
WBGene00016561	eri-6
WBGene00219372	F01E11.17
WBGene00017156	F01E11.3
WBGene00195073	F02E11.7
WBGene00017243	F08C6.5
WBGene00017290	F09E5.12
WBGene00044296	F10C1.9
WBGene00017353	F10E9.1
WBGene00008713	F11E6.10
WBGene00008746	F13E6.2
WBGene00008932	F18A11.5
WBGene00017568	F18E9.1
WBGene00194713	F19B10.13
WBGene00008989	F20G2.6
WBGene00017730	F22H10.6
WBGene00017792	F25E5.16
WBGene00017858	F27C1.11
WBGene00017908	F28H1.1
WBGene00195244	F30A10.15
WBGene00009326	F32D8.1
WBGene00009375	F34D10.6
WBGene00077536	F38B7.10
WBGene00009543	F38E11.6
WBGene00018213	F39H12.2
WBGene00018214	F39H12.3
WBGene00009625	F41E7.9
WBGene00018314	F41H10.1
WBGene00249817	F42G8.19
WBGene00009716	F44G4.7
WBGene00009774	F46B6.9
WBGene00018521	F46H5.5
WBGene00009826	F47G4.5
WBGene00018582	F48A9.2
WBGene00018608	F48E3.9
WBGene00044410	F48E8.8
WBGene00009867	F49C5.4
WBGene00009869	F49C5.7
WBGene00009901	F49E12.8
WBGene00018654	F49H12.3
WBGene00018772	F53G12.4
WBGene00018855	F55A4.3
WBGene00018879	F55D10.4
WBGene00010236	F58B4.3
WBGene00010239	F58B4.6
WBGene00010318	F59B10.2
WBGene00010329	F59D12.1
WBGene00019128	F59G1.4
WBGene00012626	famh-161
WBGene00011983	fbxa-81
WBGene00013403	fbxb-100
WBGene00017911	fbxb-106
WBGene00017912	fbxb-107
WBGene00017249	fbxb-108
WBGene00016254	fbxb-114
WBGene00019039	fbxb-18
WBGene00019040	fbxb-19
WBGene00019035	fbxb-26
WBGene00009862	fbxb-67
WBGene00008613	fbxb-69
WBGene00014149	fbxb-70
WBGene00009861	fbxb-8
WBGene00016297	fbxc-15
WBGene00018352	fbxc-20
WBGene00019591	fbxc-25
WBGene00016711	fbxc-53
WBGene00001440	fkh-8
WBGene00016114	flp-27
WBGene00008144	gasr-8
WBGene00008214	gem-1
WBGene00008256	glb-12
WBGene00020279	glb-25
WBGene00020997	gpa-18
WBGene00001681	gpc-1
WBGene00001763	gst-15
WBGene00010357	H03A11.2
WBGene00019169	H06I04.5
WBGene00019177	H10D18.1
WBGene00019185	H10E21.5
WBGene00001954	hlh-10
WBGene00001958	hlh-14
WBGene00001950	hlh-3
WBGene00001989	hot-4
WBGene00022696	ift-139
WBGene00022465	ift-20
WBGene00016121	ift-43
WBGene00016005	ift-74
WBGene00017973	ift-81
WBGene00016935	ifta-1
WBGene00012132	ifta-2
WBGene00013415	ilcr-1
WBGene00012016	inpp-1
WBGene00002118	ins-35
WBGene00002141	inx-19
WBGene00018727	jbts-14
WBGene00010495	K02B12.2
WBGene00019395	K04F10.2
WBGene00019403	K05B2.2
WBGene00010592	K06A4.2
WBGene00019482	K07C11.10
WBGene00010647	K08C7.4
WBGene00010683	K08F8.7
WBGene00019554	K09C4.10
WBGene00019643	K11C4.2
WBGene00019663	K11H12.7
WBGene00008570	kcnl-2
WBGene00015387	kcnl-3
WBGene00002224	klp-13
WBGene00018523	lact-1
WBGene00007191	lgc-20
WBGene00269373	M01D1.12
WBGene00044144	M153.4
WBGene00016397	maph-9
WBGene00015478	mapk-15
WBGene00019699	math-34
WBGene00008439	mfb-1
WBGene00020100	mks-1
WBGene00194710	mks-2
WBGene00018042	mks-3
WBGene00007490	mks-5
WBGene00019364	mksr-1
WBGene00021416	mksr-2
WBGene00003563	ncs-1
WBGene00021461	nekl-1
WBGene00003591	nex-4
WBGene00003714	nhr-124
WBGene00003614	nhr-15
WBGene00015901	nhr-158
WBGene00010602	nhr-197
WBGene00010603	nhr-198
WBGene00011520	nhr-213
WBGene00016126	nhr-258
WBGene00010186	nhr-283
WBGene00017198	nhr-36
WBGene00003641	nhr-51
WBGene00003642	nhr-52
WBGene00003653	nhr-63
WBGene00003752	nlp-14
WBGene00003741	nlp-3
WBGene00003745	nlp-7
WBGene00021304	nphp-2
WBGene00011261	nphp-4
WBGene00020319	npr-31
WBGene00013187	npr-34
WBGene00003829	nud-1
WBGene00003848	odr-1
WBGene00003850	odr-3
WBGene00003883	osm-1
WBGene00003892	osm-12
WBGene00003884	osm-3
WBGene00003885	osm-5
WBGene00003886	osm-6
WBGene00015287	osta-1
WBGene00011433	pde-1
WBGene00016328	pde-5
WBGene00021395	pnc-1
WBGene00004207	ptb-1
WBGene00010971	R01E6.7
WBGene00045190	R01H2.8
WBGene00011028	R05D7.3
WBGene00011060	R06C1.6
WBGene00011121	R07E5.17
WBGene00011137	R08A2.7
WBGene00011289	R102.2
WBGene00011223	R10H10.4
WBGene00045336	R11D1.12
WBGene00004281	rab-28
WBGene00004316	rbf-1
WBGene00016703	rdl-1
WBGene00004346	rgs-3
WBGene00012332	rpi-1
WBGene00019536	rpi-2
WBGene00007710	rsa-1
WBGene00020572	rund-1
WBGene00004740	scd-2
WBGene00015716	sox-4
WBGene00005165	srg-7
WBGene00005559	sri-47
WBGene00005560	sri-48
WBGene00006055	ssr-2
WBGene00006161	str-109
WBGene00016945	sulp-1
WBGene00006462	svh-5
WBGene00006368	sym-3
WBGene00011366	T02C1.2
WBGene00020163	T02G5.3
WBGene00020196	T03G11.3
WBGene00050889	T04C12.9
WBGene00020231	T05A8.5
WBGene00011471	T05C12.8
WBGene00011545	T06G6.3
WBGene00020349	T08B2.11
WBGene00020444	T12B3.1
WBGene00020482	T13C2.7
WBGene00020581	T19D12.6
WBGene00044767	T23B7.3
WBGene00020726	T23C6.4
WBGene00020736	T23F2.3
WBGene00020759	T24C4.3
WBGene00020826	T26A8.3
WBGene00020844	T27A10.2
WBGene00006388	taf-7.1
WBGene00006525	tax-2
WBGene00006526	tax-4
WBGene00006531	tba-5
WBGene00006538	tbb-4
WBGene00043308	tmem-107
WBGene00008643	tmem-138
WBGene00022733	tmem-17
WBGene00044771	tmem-218
WBGene00020825	tmem-231
WBGene00006603	tps-2
WBGene00006655	tub-1
WBGene00006669	twk-14
WBGene00006843	unc-119
WBGene00006779	unc-43
WBGene00012238	W04A8.3
WBGene00012372	W09H1.1
WBGene00219300	W10G6.6
WBGene00016165	wdr-60
WBGene00006949	wrt-3
WBGene00006960	xbx-1
WBGene00010864	xbx-3
WBGene00016025	xbx-4
WBGene00022419	Y102A11A.9
WBGene00013723	Y106G6H.13
WBGene00013751	Y113G7A.14
WBGene00194982	Y17D7B.10
WBGene00021254	Y22D7AL.16
WBGene00012548	Y37D8A.6
WBGene00021383	Y37F4.2
WBGene00194689	Y38H6C.24
WBGene00012760	Y41C4A.17
WBGene00012833	Y43F8C.11
WBGene00044437	Y47G6A.32
WBGene00012989	Y48C3A.5
WBGene00021734	Y50C1A.2
WBGene00021799	Y53G8AL.1
WBGene00021804	Y53G8AM.4
WBGene00021915	Y55D5A.1
WBGene00013322	Y57G11C.32
WBGene00219421	Y66D12A.30
WBGene00022503	ZC13.2
WBGene00269432	ZC132.11
WBGene00022522	ZC132.3
WBGene00014233	ZK1128.7
WBGene00045248	ZK180.7
WBGene00022790	ZK682.7
WBGene00022824	ZK813.5
WBGene00044020	ZK856.14
WBGene00022842	ZK994.6

## Sheet: Panneuronal
WormBase_ID	gene_name
WBGene00009920	abts-1
WBGene00012099	acc-4
WBGene00008167	acox-1.5
WBGene00000051	acr-12
WBGene00000068	acy-1
WBGene00000086	aex-3
WBGene00000089	aex-6
WBGene00044701	AH9.6
WBGene00013326	anoh-2
WBGene00000160	apb-1
WBGene00000157	aps-2
WBGene00000166	apt-9
WBGene00000195	arr-1
WBGene00021059	atat-2
WBGene00206505	B0250.18
WBGene00007193	B0491.6
WBGene00000248	ben-1
WBGene00235291	C01G5.25
WBGene00015494	C05E11.3
WBGene00015619	C08G9.1
WBGene00015649	C09F5.3
WBGene00015748	C14A11.2
WBGene00015751	C14A11.6
WBGene00015866	C16E9.2
WBGene00015935	C17H12.10
WBGene00016033	C24A3.2
WBGene00016044	C24B5.1
WBGene00044297	C25B8.8
WBGene00007746	C26D10.6
WBGene00016237	C29H12.6
WBGene00007882	C33A12.3
WBGene00007959	C35C5.10
WBGene00016456	C35E7.4
WBGene00206380	C42D4.18
WBGene00016635	C44B11.6
WBGene00008226	C50B8.4
WBGene00008255	C51E3.10
WBGene00000277	cab-1
WBGene00000284	cah-6
WBGene00000288	cal-4
WBGene00007119	calf-1
WBGene00017240	calu-2
WBGene00000403	casy-1
WBGene00013042	cccp-1
WBGene00009258	ccdc-149
WBGene00016384	cdgs-1
WBGene00011955	cdka-1
WBGene00015934	ceh-48
WBGene00000481	cha-1
WBGene00018468	cla-1
WBGene00010796	clip-1
WBGene00000552	cmd-1
WBGene00000554	cnb-1
WBGene00000534	cpi-2
WBGene00022271	cpx-1
WBGene00006424	ctbp-1
WBGene00007653	cysl-1
WBGene00008438	DH11.5
WBGene00012019	dkf-2
WBGene00011345	dma-1
WBGene00007058	dmd-6
WBGene00001034	dnj-16
WBGene00008453	E02A10.3
WBGene00001145	eat-16
WBGene00001137	eat-6
WBGene00001189	egl-21
WBGene00001172	egl-3
WBGene00001177	egl-8
WBGene00001224	ehs-1
WBGene00009304	eva-1
WBGene00001374	exp-2
WBGene00017193	F07C3.2
WBGene00017309	F09F9.4
WBGene00017350	F10E7.9
WBGene00008865	F15G9.1
WBGene00017653	F21C10.3
WBGene00017900	F28E10.1
WBGene00017906	F28F9.2
WBGene00017914	F29A7.4
WBGene00009274	F30F8.5
WBGene00009315	F32B4.5
WBGene00017983	F32D1.3
WBGene00009325	F32D8.15
WBGene00001335	F35A5.8
WBGene00009403	F35C11.4
WBGene00018078	F35H12.6
WBGene00009496	F36H1.11
WBGene00018115	F36H9.7
WBGene00009531	F38B2.4
WBGene00018175	F38B6.6
WBGene00009558	F39B2.8
WBGene00009676	F44A6.4
WBGene00018462	F45E1.1
WBGene00018517	F46G11.4
WBGene00010045	F54C9.11
WBGene00010059	F54E4.3
WBGene00018985	F56F10.2
WBGene00010192	F57B7.2
WBGene00001452	flp-9
WBGene00001475	fmi-1
WBGene00001494	frm-8
WBGene00001502	ftt-2
WBGene00009917	glb-18
WBGene00021980	glb-32
WBGene00001637	gly-12
WBGene00001648	goa-1
WBGene00001669	gpa-7
WBGene00001679	gpb-1
WBGene00001680	gpb-2
WBGene00001682	gpc-2
WBGene00001787	gst-39
WBGene00019188	H11E01.3
WBGene00019270	H41C03.3
WBGene00007953	hda-11
WBGene00015767	hex-2
WBGene00001858	hil-7
WBGene00001911	his-37
WBGene00001915	his-41
WBGene00001957	hlh-13
WBGene00002048	ida-1
WBGene00021353	iglr-3
WBGene00002176	jip-1
WBGene00002177	jkk-1
WBGene00002178	jnk-1
WBGene00019284	K01A2.10
WBGene00019324	K02F2.5
WBGene00010674	K08E7.6
WBGene00235164	K09F6.13
WBGene00010737	K10C8.4
WBGene00019623	K10C9.1
WBGene00019641	K10G6.4
WBGene00010756	K10G9.2
WBGene00019205	kcc-2
WBGene00002216	klp-3
WBGene00002219	klp-7
WBGene00002344	let-70
WBGene00022500	lfi-1
WBGene00009799	lgc-47
WBGene00002980	lgg-1
WBGene00018804	lido-15
WBGene00003000	lin-11
WBGene00002991	lin-2
WBGene00007261	lron-3
WBGene00010827	M02B1.2
WBGene00010838	M03C11.1
WBGene00019781	M60.6
WBGene00009958	madd-4
WBGene00016841	magu-3
WBGene00009306	maph-1.1
WBGene00016903	marc-4
WBGene00013273	marc-5
WBGene00003143	max-1
WBGene00003175	mec-12
WBGene00020051	mfsd-6
WBGene00003368	mkk-4
WBGene00020447	mob-3
WBGene00003404	mpz-1
WBGene00018393	msra-1
WBGene00003564	ncs-2
WBGene00003695	nhr-105
WBGene00003706	nhr-116
WBGene00019116	nhr-143
WBGene00018265	nhr-182
WBGene00003635	nhr-45
WBGene00003640	nhr-50
WBGene00003674	nhr-84
WBGene00003733	nhx-5
WBGene00018854	nlf-1
WBGene00003753	nlp-15
WBGene00008820	nlp-55
WBGene00019434	nmtn-1
WBGene00007799	nrx-1
WBGene00015038	nstp-6
WBGene00003849	odr-2
WBGene00045483	oxy-5
WBGene00020397	pcbd-1
WBGene00003961	pct-1
WBGene00003966	pdl-1
WBGene00017671	pgal-1
WBGene00022144	pghm-1
WBGene00003996	pgp-2
WBGene00010813	pitp-1
WBGene00004088	ppk-2
WBGene00016580	ppm-1.H
WBGene00004131	pqn-44
WBGene00004208	ptc-1
WBGene00004215	ptp-3
WBGene00010558	ptp-4
WBGene00004220	ptr-5
WBGene00019870	R04E5.7
WBGene00011073	R07A4.2
WBGene00011090	R07B7.6
WBGene00019988	R09F10.5
WBGene00044411	R12B2.8
WBGene00004267	rab-3
WBGene00018869	rfip-1
WBGene00004344	rgs-1
WBGene00004349	rgs-6
WBGene00004368	ric-19
WBGene00004363	ric-3
WBGene00004364	ric-4
WBGene00004372	rig-5
WBGene00006513	rimb-1
WBGene00004401	rom-2
WBGene00004457	rpm-1
WBGene00011531	rsbp-1
WBGene00004719	sad-1
WBGene00004732	sax-7
WBGene00011392	sbt-1
WBGene00012100	sipa-1
WBGene00004807	skr-1
WBGene00022647	slc-17.1
WBGene00012130	slc-17.4
WBGene00004830	slo-1
WBGene00004897	snb-1
WBGene00004912	sng-1
WBGene00004913	snn-1
WBGene00004921	snt-1
WBGene00004923	snt-3
WBGene00004924	snt-4
WBGene00010587	sol-2
WBGene00005647	srp-6
WBGene00005655	srr-4
WBGene00006066	sto-4
WBGene00014021	svop-1
WBGene00006363	syd-1
WBGene00011326	T01D3.1
WBGene00119203	T04A8.18
WBGene00020390	T10B5.4
WBGene00011763	T14B1.1
WBGene00020502	T14B4.8
WBGene00020510	T14G11.1
WBGene00020854	T27C4.1
WBGene00020894	T28D9.1
WBGene00007041	tag-180
WBGene00006527	tax-6
WBGene00018639	tbc-16
WBGene00018281	tbc-18
WBGene00016292	tbc-7
WBGene00006578	tli-1
WBGene00016321	tppp-1
WBGene00007801	trpa-1
WBGene00006633	tsp-7
WBGene00013197	ttm-5
WBGene00011564	ugt-50
WBGene00006741	unc-1
WBGene00006750	unc-10
WBGene00006831	unc-104
WBGene00006833	unc-108
WBGene00006839	unc-115
WBGene00006753	unc-14
WBGene00006755	unc-16
WBGene00006756	unc-17
WBGene00006757	unc-18
WBGene00006742	unc-2
WBGene00006761	unc-24
WBGene00006743	unc-3
WBGene00006769	unc-33
WBGene00006772	unc-36
WBGene00006774	unc-38
WBGene00006777	unc-41
WBGene00006778	unc-42
WBGene00006788	unc-53
WBGene00006807	unc-75
WBGene00006808	unc-76
WBGene00006811	unc-79
WBGene00006812	unc-80
WBGene00006923	vhp-1
WBGene00012193	vps-25
WBGene00020929	W02C12.2
WBGene00012274	W05B5.1
WBGene00012289	W05H12.1
WBGene00022412	Y102A11A.2
WBGene00013711	Y106G6G.2
WBGene00013713	Y106G6G.4
WBGene00012473	Y17G7B.22
WBGene00021272	Y23H5B.1
WBGene00021333	Y34D9A.8
WBGene00012662	Y39A1C.1
WBGene00012853	Y44A6D.2
WBGene00021556	Y45G5AM.3
WBGene00013098	Y51H4A.1
WBGene00021838	Y54E10BL.3
WBGene00021890	Y54G2A.26
WBGene00013317	Y57G11C.22
WBGene00013307	Y57G11C.9
WBGene00013456	Y67A10A.7
WBGene00022201	Y71H10B.1
WBGene00022175	Y71H2AM.10
WBGene00013518	Y73F8A.5
WBGene00006970	zag-1
WBGene00013897	ZC443.2
WBGene00022623	ZC487.1
WBGene00022518	zfh-2
WBGene00006985	zig-8
WBGene00164985	ZK1010.10
WBGene00013962	ZK287.1
WBGene00022648	ZK54.3
WBGene00014079	ZK792.7

## Sheet: Ubiquitous
WormBase_ID	gene_name
WBGene00007063	2L52.1
WBGene00009583	aagr-3
WBGene00020142	aak-2
WBGene00013732	aakg-1
WBGene00020633	aakg-2
WBGene00000196	aars-1
WBGene00000197	aars-2
WBGene00000003	aat-2
WBGene00000004	aat-3
WBGene00012714	abce-1
WBGene00006512	abcf-1
WBGene00018339	abcf-3
WBGene00011029	abhd-11.2
WBGene00022393	abhd-12
WBGene00016507	abhd-5.2
WBGene00015146	abi-1
WBGene00000018	abl-1
WBGene00022281	abtm-1
WBGene00017125	acdh-12
WBGene00001566	acdh-13
WBGene00020812	acdh-7
WBGene00017874	acdh-9
WBGene00016601	acin-1
WBGene00015295	acl-12
WBGene00019465	acl-14
WBGene00011543	acl-2
WBGene00006491	acl-3
WBGene00018657	acl-4
WBGene00011106	acl-5
WBGene00017261	acl-6
WBGene00000041	aco-2
WBGene00022037	acs-13
WBGene00018152	acs-4
WBGene00000063	act-1
WBGene00000064	act-2
WBGene00000065	act-3
WBGene00000066	act-4
WBGene00017967	ada-2
WBGene00000073	add-2
WBGene00000074	adm-2
WBGene00000079	adr-1
WBGene00011050	agl-1
WBGene00000092	ags-3
WBGene00000094	agt-2
WBGene00011767	agxt-1
WBGene00014999	AH9.3
WBGene00000095	aha-1
WBGene00019322	ahcy-1
WBGene00045192	aho-3
WBGene00007235	ahsa-1
WBGene00015547	ain-1
WBGene00015007	ain-2
WBGene00000097	aip-1
WBGene00000101	aka-1
WBGene00017088	akir-1
WBGene00000102	akt-1
WBGene00000105	alg-1
WBGene00000106	alg-2
WBGene00007043	algn-10
WBGene00015162	algn-11
WBGene00011193	algn-13
WBGene00019276	algn-5
WBGene00007435	algn-6
WBGene00000112	alh-6
WBGene00000114	alh-8
WBGene00011292	allo-1
WBGene00007010	alx-1
WBGene00000120	aly-1
WBGene00000123	ama-1
WBGene00010284	aman-2
WBGene00010272	amph-1
WBGene00000137	amx-1
WBGene00015938	anat-1
WBGene00000140	anc-1
WBGene00006439	ant-1.1
WBGene00000143	apc-2
WBGene00000162	apd-3
WBGene00000146	ape-1
WBGene00000158	apg-1
WBGene00000164	apm-3
WBGene00000156	apr-1
WBGene00000159	aps-1
WBGene00000165	aps-3
WBGene00000178	aqp-10
WBGene00000179	aqp-11
WBGene00000183	arf-3
WBGene00000184	arf-6
WBGene00013538	ari-1.4
WBGene00000192	arl-8
WBGene00015145	arle-14
WBGene00013168	arp-1
WBGene00016793	arp-11
WBGene00007296	arrd-25
WBGene00000200	arx-2
WBGene00000201	arx-3
WBGene00000203	arx-5
WBGene00000204	arx-6
WBGene00000205	arx-7
WBGene00000207	asb-2
WBGene00011279	asd-1
WBGene00006423	asd-2
WBGene00000209	asg-1
WBGene00000210	asg-2
WBGene00012458	ash-2
WBGene00000217	asp-4
WBGene00010015	atad-3
WBGene00000220	atf-2
WBGene00000221	atf-5
WBGene00000222	atf-6
WBGene00013878	atfs-1
WBGene00017178	atg-16.1
WBGene00019427	atg-16.2
WBGene00018294	atg-18
WBGene00019748	atg-2
WBGene00021922	atg-3
WBGene00013595	atg-4.1
WBGene00020706	atg-9
WBGene00015484	atgl-1
WBGene00008081	athp-1
WBGene00000226	atl-1
WBGene00021868	atln-1
WBGene00010419	atp-1
WBGene00000229	atp-2
WBGene00000230	atp-3
WBGene00007385	atp-5
WBGene00010960	atp-6
WBGene00006432	atrn-1
WBGene00017317	attf-2
WBGene00015477	attf-4
WBGene00020214	attf-5
WBGene00012474	attf-6
WBGene00000231	atx-2
WBGene00009212	atz-1
WBGene00007089	B0001.4
WBGene00007094	B0019.2
WBGene00007113	B0035.15
WBGene00007106	B0035.3
WBGene00015009	B0041.5
WBGene00015011	B0041.8
WBGene00015017	B0205.1
WBGene00015023	B0205.9
WBGene00015063	B0228.6
WBGene00015075	B0238.11
WBGene00007122	B0250.5
WBGene00015096	B0261.8
WBGene00007129	B0272.3
WBGene00015104	B0280.9
WBGene00015112	B0281.5
WBGene00007133	B0284.3
WBGene00007136	B0285.3
WBGene00015115	B0286.1
WBGene00015125	B0303.3
WBGene00015126	B0303.4
WBGene00007144	B0334.4
WBGene00015156	B0361.2
WBGene00015157	B0361.3
WBGene00015160	B0361.6
WBGene00007175	B0395.3
WBGene00015181	B0416.5
WBGene00007186	B0464.6
WBGene00007188	B0464.9
WBGene00007189	B0491.1
WBGene00007192	B0491.5
WBGene00015208	B0495.9
WBGene00015219	B0507.2
WBGene00015237	B0511.12
WBGene00015251	B0546.4
WBGene00021726	bath-10
WBGene00009945	bath-38
WBGene00009137	bath-39
WBGene00013689	bath-40
WBGene00018137	bath-41
WBGene00016803	bath-42
WBGene00011815	bath-43
WBGene00015567	bath-44
WBGene00021725	bath-9
WBGene00001470	baz-2
WBGene00012713	bckd-1A
WBGene00016192	bcl-7
WBGene00015266	BE0003N10.1
WBGene00000247	bec-1
WBGene00012674	bed-1
WBGene00022473	bet-1
WBGene00010199	bet-2
WBGene00000249	bir-1
WBGene00014569	bkip-1
WBGene00000253	bli-3
WBGene00010981	blos-8
WBGene00017293	bmy-1
WBGene00000259	bpl-1
WBGene00044063	bpnt-1
WBGene00017757	bra-2
WBGene00020316	brc-2
WBGene00000269	bre-4
WBGene00000270	bre-5
WBGene00019726	bris-1
WBGene00020802	btb-2
WBGene00019142	btb-4
WBGene00018438	btb-6
WBGene00019888	btbd-10
WBGene00007400	bud-31
WBGene00007213	C01A2.1
WBGene00015280	C01B10.6
WBGene00015283	C01B10.9
WBGene00219207	C01F6.14
WBGene00007223	C01F6.9
WBGene00007237	C01G10.10
WBGene00007236	C01G10.9
WBGene00007225	C01G6.3
WBGene00007227	C01G6.5
WBGene00015329	C02B10.4
WBGene00015330	C02B10.5
WBGene00015324	C02B8.6
WBGene00015336	C02D5.2
WBGene00015357	C02F12.8
WBGene00015352	C02F5.12
WBGene00007266	C03A3.1
WBGene00015386	C03B8.3
WBGene00007284	C03H12.1
WBGene00015405	C03H5.3
WBGene00015425	C04E6.11
WBGene00015430	C04E7.3
WBGene00007329	C05C10.2
WBGene00015488	C05D11.13
WBGene00015472	C05D9.3
WBGene00015474	C05D9.7
WBGene00015501	C06A5.3
WBGene00015507	C06A6.2
WBGene00015518	C06E1.1
WBGene00015529	C06E2.5
WBGene00015551	C06G3.5
WBGene00015552	C06G3.6
WBGene00015569	C07D10.5
WBGene00015581	C07H6.4
WBGene00007429	C08B6.8
WBGene00015613	C08F1.10
WBGene00044417	C08F1.11
WBGene00015610	C08F1.6
WBGene00007449	C08F8.9
WBGene00086566	C08H9.16
WBGene00015624	C09B8.5
WBGene00015638	C09E7.4
WBGene00015641	C09E7.7
WBGene00007476	C09E9.1
WBGene00007499	C09H10.5
WBGene00015702	C11D2.4
WBGene00007531	C11H1.7
WBGene00050944	C14A11.9
WBGene00007573	C14B1.2
WBGene00015755	C14B9.10
WBGene00015754	C14B9.8
WBGene00007588	C14C10.5
WBGene00015769	C14C11.7
WBGene00007602	C15C6.3
WBGene00015791	C15C7.5
WBGene00015801	C15H9.5
WBGene00015815	C16A11.2
WBGene00015824	C16B8.4
WBGene00007625	C16C10.4
WBGene00015868	C16H3.3
WBGene00219313	C17E4.20
WBGene00007645	C17E4.6
WBGene00015926	C17H11.6
WBGene00015945	C18A3.9
WBGene00007666	C18B12.4
WBGene00007668	C18B12.6
WBGene00015955	C18B2.4
WBGene00007681	C18D11.3
WBGene00015972	C18E3.3
WBGene00015976	C18E3.9
WBGene00007683	C18E9.2
WBGene00007684	C18E9.4
WBGene00016002	C18H9.3
WBGene00016009	C23F12.4
WBGene00016012	C23G10.5
WBGene00016014	C23G10.7
WBGene00016015	C23G10.8
WBGene00016055	C24D10.4
WBGene00016057	C24D10.6
WBGene00016062	C24G6.8
WBGene00016071	C24H12.1
WBGene00016072	C24H12.2
WBGene00016073	C24H12.4
WBGene00007705	C25A1.1
WBGene00016102	C25F6.1
WBGene00016118	C25H3.9
WBGene00016129	C26B2.7
WBGene00016135	C26B9.6
WBGene00007744	C26D10.3
WBGene00007745	C26D10.4
WBGene00016145	C26E6.12
WBGene00007774	C27C12.4
WBGene00016171	C27F2.10
WBGene00043156	C27F2.9
WBGene00016172	C27H5.2
WBGene00016208	C29E4.11
WBGene00016209	C29E4.12
WBGene00043051	C29E4.13
WBGene00007812	C29F7.3
WBGene00016235	C29H12.2
WBGene00016244	C30B5.2
WBGene00016269	C30G4.4
WBGene00007826	C30H6.9
WBGene00007846	C31E10.5
WBGene00007847	C31E10.6
WBGene00007850	C31G12.1
WBGene00007855	C31H5.4
WBGene00016318	C32D5.11
WBGene00016323	C32E8.5
WBGene00016333	C32F10.8
WBGene00007878	C33A11.2
WBGene00007880	C33A12.1
WBGene00194651	C33D9.13
WBGene00007900	C33D9.6
WBGene00016349	C33E10.8
WBGene00007906	C33G3.6
WBGene00016393	C34B2.8
WBGene00007921	C34C12.2
WBGene00007927	C34C12.8
WBGene00016406	C34D10.1
WBGene00016400	C34D4.4
WBGene00016411	C34E10.10
WBGene00007944	C34F6.10
WBGene00007943	C34F6.9
WBGene00007952	C35A5.8
WBGene00016432	C35B1.2
WBGene00016446	C35D10.10
WBGene00016442	C35D10.5
WBGene00016457	C35E7.5
WBGene00016458	C35E7.6
WBGene00007970	C36A4.10
WBGene00016469	C36B7.6
WBGene00016490	C36E6.2
WBGene00007980	C36E8.1
WBGene00016493	C37A2.7
WBGene00016494	C37A2.8
WBGene00016501	C37C3.9
WBGene00016511	C37H5.13
WBGene00016508	C37H5.5
WBGene00008034	C39E9.11
WBGene00016540	C39F7.5
WBGene00016545	C40A11.2
WBGene00016546	C40A11.3
WBGene00016547	C40A11.4
WBGene00016549	C40A11.6
WBGene00016562	C41D11.3
WBGene00016590	C42C1.12
WBGene00016591	C42C1.13
WBGene00016617	C43H6.4
WBGene00016629	C44B7.7
WBGene00008094	C44H4.4
WBGene00185117	C45B11.9
WBGene00016661	C45B2.6
WBGene00001590	C45G3.3
WBGene00016674	C45G9.2
WBGene00016676	C45G9.5
WBGene00044567	C46C11.4
WBGene00008110	C46C2.2
WBGene00008114	C46C2.6
WBGene00045078	C46C2.7
WBGene00008119	C46F11.4
WBGene00008121	C46F11.6
WBGene00016725	C46H3.2
WBGene00008136	C47D12.2
WBGene00008147	C47E12.2
WBGene00008143	C47E8.4
WBGene00008165	C47G2.4
WBGene00016746	C48B6.10
WBGene00016741	C48B6.3
WBGene00016745	C48B6.9
WBGene00008177	C48D1.1
WBGene00016764	C49A9.10
WBGene00008204	C49C3.15
WBGene00008196	C49C3.6
WBGene00008198	C49C3.8
WBGene00016790	C49H3.3
WBGene00016792	C49H3.6
WBGene00016794	C49H3.9
WBGene00008219	C50B6.3
WBGene00016808	C50D2.5
WBGene00008232	C50F4.4
WBGene00001910	C50F4.6
WBGene00016864	C52A10.3
WBGene00016867	C52B9.4
WBGene00016868	C52B9.8
WBGene00016888	C52E12.1
WBGene00008273	C53B4.3
WBGene00008274	C53B4.4
WBGene00016902	C53D5.1
WBGene00016906	C53D5.5
WBGene00008281	C53D6.4
WBGene00008283	C53D6.6
WBGene00016907	C53H9.2
WBGene00044746	C53H9.3
WBGene00008310	C54E10.6
WBGene00008330	C55A6.1
WBGene00008339	C55A6.10
WBGene00008343	C56A3.4
WBGene00008344	C56A3.5
WBGene00016970	C56E6.2
WBGene00016983	C56G2.15
WBGene00009260	calm-1
WBGene00019760	calu-1
WBGene00000289	cam-1
WBGene00020251	camt-1
WBGene00000292	cap-1
WBGene00000293	cap-2
WBGene00012484	car-1
WBGene00000800	cars-1
WBGene00000294	cas-1
WBGene00010631	cash-1
WBGene00012341	catp-6
WBGene00000301	cav-1
WBGene00000366	cbp-1
WBGene00013866	cbs-1
WBGene00000367	cca-1
WBGene00003085	ccar-1
WBGene00014204	ccdc-47
WBGene00000369	ccf-1
WBGene00009650	ccnk-1
WBGene00000376	ccr-4
WBGene00000377	cct-1
WBGene00000378	cct-2
WBGene00018782	cct-3
WBGene00000379	cct-4
WBGene00000380	cct-5
WBGene00000381	cct-6
WBGene00021934	cct-8
WBGene00010283	ccz-1
WBGene00000383	cdc-14
WBGene00000386	cdc-25.1
WBGene00000387	cdc-25.2
WBGene00021097	cdc-37
WBGene00000390	cdc-42
WBGene00007352	cdc-48.1
WBGene00008053	cdc-48.2
WBGene00000382	cdc-6
WBGene00018064	cdc-73
WBGene00000393	cdf-1
WBGene00000396	cdh-4
WBGene00015203	cdk-11.1
WBGene00013917	cdk-11.2
WBGene00007135	cdk-12
WBGene00000406	cdk-4
WBGene00000407	cdk-5
WBGene00000408	cdk-7
WBGene00000409	cdk-8
WBGene00000410	cdk-9
WBGene00013765	cdkr-3
WBGene00010471	cdr-6
WBGene00016754	cebp-2
WBGene00000414	cec-1
WBGene00022831	cec-10
WBGene00011636	cec-3
WBGene00017990	cec-4
WBGene00017993	cec-5
WBGene00000415	ced-1
WBGene00000425	ced-11
WBGene00000416	ced-2
WBGene00000419	ced-5
WBGene00000421	ced-7
WBGene00000422	ced-8
WBGene00017825	cee-1
WBGene00012584	ceh-100
WBGene00000443	ceh-20
WBGene00000444	ceh-21
WBGene00000455	ceh-34
WBGene00000459	ceh-38
WBGene00007417	ceh-58
WBGene00013876	ceh-74
WBGene00018446	ceh-83
WBGene00018355	ceh-86
WBGene00008195	ceh-88
WBGene00019864	ceh-93
WBGene00044032	ceh-99
WBGene00000466	cel-1
WBGene00000469	ces-2
WBGene00000472	cey-1
WBGene00000475	cey-4
WBGene00009668	cfim-1
WBGene00008362	cfim-2
WBGene00000478	cfz-2
WBGene00006496	cgef-1
WBGene00000479	cgh-1
WBGene00011867	chc-1
WBGene00010942	chch-3
WBGene00010369	chd-1
WBGene00000482	chd-3
WBGene00007053	chd-7
WBGene00015687	chdp-1
WBGene00015267	chin-1
WBGene00000500	chn-1
WBGene00000503	cht-1
WBGene00000506	cic-1
WBGene00015347	cids-1
WBGene00010909	cisd-3.1
WBGene00022053	cisd-3.2
WBGene00000507	cit-1.1
WBGene00000508	cit-1.2
WBGene00000511	ckb-1
WBGene00000514	ckb-4
WBGene00000516	cki-1
WBGene00000532	clh-5
WBGene00020246	clic-1
WBGene00000542	clp-1
WBGene00000543	clp-2
WBGene00000548	clr-1
WBGene00000549	cls-2
WBGene00013847	cls-3
WBGene00009127	clsp-1
WBGene00000550	clu-1
WBGene00018474	cnep-1
WBGene00000565	cnt-1
WBGene00000567	cnx-1
WBGene00018046	coa-3
WBGene00011857	coa-4
WBGene00012483	coa-5
WBGene00000583	cof-2
WBGene00000585	cogc-2
WBGene00019481	cogc-6
WBGene00019820	cogc-8
WBGene00000591	coh-1
WBGene00021560	coh-4
WBGene00022119	copa-1
WBGene00021292	copb-1
WBGene00009542	copb-2
WBGene00015734	copd-1
WBGene00010333	copz-1
WBGene00000763	coq-3
WBGene00000765	coq-5
WBGene00000767	coq-8
WBGene00011875	cox-14
WBGene00012354	cox-4
WBGene00012553	cox-5A
WBGene00000371	cox-5B
WBGene00006519	cox-6A
WBGene00022170	cox-6B
WBGene00017926	cox-6C
WBGene00009161	cox-7C
WBGene00012073	cpd-2
WBGene00000773	cpf-1
WBGene00000774	cpf-2
WBGene00022301	cpsf-1
WBGene00044329	cpsf-4
WBGene00012907	cpt-1
WBGene00011122	cpt-2
WBGene00020068	cra-1
WBGene00016162	crh-2
WBGene00010303	cri-3
WBGene00008624	crld-1
WBGene00010641	crml-1
WBGene00007056	crn-7
WBGene00000802	crt-1
WBGene00000803	csb-1
WBGene00000812	csk-1
WBGene00000813	csn-1
WBGene00000817	csn-5
WBGene00013709	csnk-1
WBGene00017472	cst-1
WBGene00000829	ctb-1
WBGene00010964	ctc-1
WBGene00010965	ctc-2
WBGene00010962	ctc-3
WBGene00007068	cTel55X.1
WBGene00022856	cth-2
WBGene00000832	ctn-1
WBGene00007184	ctr-9
WBGene00000835	cuc-1
WBGene00000836	cul-1
WBGene00000837	cul-2
WBGene00000838	cul-3
WBGene00000839	cul-4
WBGene00000840	cul-5
WBGene00013093	cup-14
WBGene00000843	cup-2
WBGene00000846	cup-5
WBGene00022025	cus-2
WBGene00000854	cux-7
WBGene00011687	cwc-15
WBGene00000858	cwn-2
WBGene00000865	cyb-1
WBGene00000868	cyb-3
WBGene00000874	cyk-3
WBGene00000876	cyl-1
WBGene00000877	cyn-1
WBGene00000886	cyn-10
WBGene00000887	cyn-11
WBGene00000888	cyn-12
WBGene00000891	cyn-15
WBGene00000879	cyn-3
WBGene00000880	cyn-4
WBGene00000883	cyn-7
WBGene00000884	cyn-8
WBGene00022697	cyy-1
WBGene00044134	D1025.10
WBGene00017025	D1037.1
WBGene00008363	D1046.2
WBGene00008370	D1054.1
WBGene00017037	D1069.3
WBGene00008398	D2005.3
WBGene00008410	D2023.6
WBGene00008412	D2030.2
WBGene00008414	D2030.4
WBGene00008422	D2045.2
WBGene00017072	D2096.5
WBGene00000894	dab-1
WBGene00000896	dad-1
WBGene00000897	daf-1
WBGene00000911	daf-15
WBGene00000912	daf-16
WBGene00000899	daf-3
WBGene00000923	daf-31
WBGene00000900	daf-4
WBGene00022599	daf-41
WBGene00018364	dagl-2
WBGene00000931	dao-5
WBGene00001094	dars-1
WBGene00014054	dbt-1
WBGene00014243	dcaf-1
WBGene00021929	dcap-1
WBGene00010428	dcn-1
WBGene00000938	dcp-66
WBGene00000939	dcr-1
WBGene00000940	dcs-1
WBGene00015776	dct-1
WBGene00010890	ddb-1
WBGene00015308	ddi-1
WBGene00000941	ddp-1
WBGene00018967	ddx-15
WBGene00010260	ddx-17
WBGene00000994	dec-1
WBGene00011891	del-6
WBGene00018681	denn-4
WBGene00000961	dgn-1
WBGene00007126	dhcr-7
WBGene00007974	dhfr-1
WBGene00008606	dhhc-1
WBGene00019344	dhhc-10
WBGene00044071	dhhc-14
WBGene00014075	dhhc-4
WBGene00007637	dhhc-7
WBGene00012718	dhhc-8
WBGene00016620	dhhc-9
WBGene00020932	dhod-1
WBGene00000976	dhs-13
WBGene00000982	dhs-19
WBGene00000988	dhs-25
WBGene00017735	did-2
WBGene00000995	die-1
WBGene00008549	din-1
WBGene00017885	dip-2
WBGene00001001	dis-3
WBGene00009082	dlat-1
WBGene00007824	dlat-2
WBGene00001005	dlc-1
WBGene00010794	dld-1
WBGene00001007	dli-1
WBGene00012832	dmd-3
WBGene00001017	dnc-1
WBGene00001018	dnc-2
WBGene00021149	dnc-3
WBGene00016124	dnc-4
WBGene00001019	dnj-1
WBGene00001029	dnj-11
WBGene00001030	dnj-12
WBGene00001031	dnj-13
WBGene00001032	dnj-14
WBGene00001035	dnj-17
WBGene00001037	dnj-19
WBGene00001040	dnj-22
WBGene00001041	dnj-23
WBGene00001047	dnj-29
WBGene00001023	dnj-5
WBGene00001025	dnj-7
WBGene00001027	dnj-9
WBGene00017163	dnpp-1
WBGene00008316	dod-18
WBGene00021474	dot-1.1
WBGene00016200	dpff-1
WBGene00007488	dph-2
WBGene00010484	dph-3
WBGene00001061	dpl-1
WBGene00009219	dpm-3
WBGene00001081	dpy-22
WBGene00001082	dpy-23
WBGene00001086	dpy-27
WBGene00001088	dpy-30
WBGene00016103	dpyd-1
WBGene00009584	drap-1
WBGene00001093	drp-1
WBGene00011730	drr-2
WBGene00001101	dsh-1
WBGene00001104	dsl-2
WBGene00013201	dus-2
WBGene00022554	duxl-1
WBGene00011834	dvc-1
WBGene00013128	dxbp-1
WBGene00001115	dyb-1
WBGene00001130	dyn-1
WBGene00017084	E01A2.1
WBGene00017085	E01A2.2
WBGene00008446	E01G4.3
WBGene00008447	E01G4.5
WBGene00017098	E02D9.1
WBGene00008455	E02H1.1
WBGene00008476	E03H4.8
WBGene00017011	eaf-1
WBGene00001337	ears-1
WBGene00001338	ears-2
WBGene00018270	eas-1
WBGene00001134	eat-3
WBGene00004140	ebax-1
WBGene00012156	ebp-2
WBGene00001151	ech-2
WBGene00001152	ech-3
WBGene00001153	ech-4
WBGene00021551	edc-4
WBGene00011696	eea-1
WBGene00017138	EEED8.10
WBGene00017143	EEED8.15
WBGene00017133	EEED8.2
WBGene00001168	eef-1A.1
WBGene00001169	eef-1A.2
WBGene00018846	eef-1B.1
WBGene00012768	eef-1B.2
WBGene00008920	eef-1G
WBGene00001167	eef-2
WBGene00022069	eel-1
WBGene00013223	efa-6
WBGene00009899	efl-3
WBGene00001165	efn-4
WBGene00016311	efr-3
WBGene00001166	eftu-2
WBGene00015680	egal-1
WBGene00017147	EGAP2.1
WBGene00001193	egl-26
WBGene00001194	egl-27
WBGene00001173	egl-4
WBGene00001208	egl-44
WBGene00001209	egl-45
WBGene00001210	egl-46
WBGene00001215	ego-2
WBGene00009098	ehbp-1
WBGene00020868	eif-1
WBGene00019162	eif-1.A
WBGene00008480	eif-2A
WBGene00014221	eif-2Balpha
WBGene00012950	eif-2Bbeta
WBGene00008670	eif-2Bdelta
WBGene00008428	eif-2Bepsilon
WBGene00010560	eif-2beta
WBGene00004090	eif-2Bgamma
WBGene00016113	eif-2D
WBGene00021466	eif-2gamma
WBGene00001225	eif-3.B
WBGene00001226	eif-3.C
WBGene00001227	eif-3.D
WBGene00001228	eif-3.E
WBGene00001230	eif-3.G
WBGene00001231	eif-3.H
WBGene00001232	eif-3.I
WBGene00012738	eif-3.J
WBGene00015920	eif-3.L
WBGene00001234	eif-6
WBGene00009052	ekl-1
WBGene00013676	ekl-4
WBGene00012512	ekl-5
WBGene00001235	elb-1
WBGene00001236	elc-1
WBGene00018330	elks-1
WBGene00021281	ell-1
WBGene00001239	elo-1
WBGene00001240	elo-2
WBGene00022463	elpc-1
WBGene00013738	elpc-2
WBGene00001281	emb-27
WBGene00001258	emb-4
WBGene00001259	emb-5
WBGene00019209	emc-1
WBGene00017999	emc-6
WBGene00001303	emo-1
WBGene00011884	enol-1
WBGene00011480	enpl-1
WBGene00001320	ent-1
WBGene00010701	ent-2
WBGene00009499	ent-6
WBGene00010362	enu-3.1
WBGene00001325	eor-2
WBGene00007030	epc-1
WBGene00021468	epg-2
WBGene00012641	epg-6
WBGene00020334	epg-7
WBGene00013695	epg-8
WBGene00022078	epg-9
WBGene00019487	ephx-1
WBGene00001328	epi-1
WBGene00001329	epn-1
WBGene00018797	ept-1
WBGene00001331	erd-2.1
WBGene00016195	erd-2.2
WBGene00020269	erfa-1
WBGene00010405	erfa-3
WBGene00019971	ergo-1
WBGene00011892	erh-1
WBGene00007091	eri-12
WBGene00016566	eri-7
WBGene00016143	eri-9
WBGene00010725	erv-46
WBGene00018371	ess-2
WBGene00020443	esyt-2
WBGene00007886	ethe-1
WBGene00017606	ets-6
WBGene00001352	evl-14
WBGene00017644	exc-9
WBGene00016606	exoc-7
WBGene00013687	exoc-8
WBGene00022232	exos-2
WBGene00010325	exos-3
WBGene00001377	eya-1
WBGene00017165	F01F1.11
WBGene00017159	F01F1.2
WBGene00008505	F01G4.6
WBGene00008528	F02E9.1
WBGene00008531	F02E9.7
WBGene00017210	F07E5.5
WBGene00017216	F07F6.2
WBGene00017217	F07F6.4
WBGene00017220	F07F6.8
WBGene00008563	F07H5.13
WBGene00017238	F08B4.7
WBGene00017239	F08B6.1
WBGene00008588	F08G12.5
WBGene00008576	F08G2.4
WBGene00008578	F08G2.7
WBGene00008622	F09C8.2
WBGene00017288	F09E5.10
WBGene00017289	F09E5.11
WBGene00017286	F09E5.8
WBGene00017311	F09G2.2
WBGene00017321	F09G8.7
WBGene00045507	F10A3.17
WBGene00008642	F10B5.8
WBGene00008648	F10D11.2
WBGene00017344	F10E7.2
WBGene00017347	F10E7.5
WBGene00017360	F10E9.11
WBGene00017357	F10E9.5
WBGene00017373	F10G7.10
WBGene00017369	F10G7.5
WBGene00017372	F10G7.9
WBGene00008686	F11A10.5
WBGene00008690	F11C1.1
WBGene00045495	F11C1.7
WBGene00017397	F12A10.8
WBGene00008729	F13B12.1
WBGene00017419	F13B9.1
WBGene00017423	F13C5.2
WBGene00017428	F13D11.3
WBGene00008745	F13E6.1
WBGene00008760	F13E9.11
WBGene00008768	F13G3.10
WBGene00008766	F13G3.6
WBGene00044784	F13H10.8
WBGene00017435	F13H8.2
WBGene00008838	F15A4.2
WBGene00017481	F15B10.3
WBGene00045418	F15B9.10
WBGene00008876	F16A11.1
WBGene00008880	F16B12.4
WBGene00008882	F16B12.6
WBGene00017534	F17A9.2
WBGene00008915	F17C11.4
WBGene00008924	F17E5.2
WBGene00008925	F17H10.1
WBGene00017548	F18A1.7
WBGene00017563	F18C5.10
WBGene00008939	F18H3.1
WBGene00008940	F18H3.4
WBGene00008948	F19B6.1
WBGene00008951	F19C6.2
WBGene00017593	F19C7.3
WBGene00017607	F19F10.11
WBGene00017608	F19F10.12
WBGene00017605	F19F10.9
WBGene00008973	F20D1.1
WBGene00008975	F20D1.3
WBGene00017642	F20D12.2
WBGene00017659	F21C10.10
WBGene00009006	F21D5.1
WBGene00009009	F21D5.4
WBGene00009012	F21D5.7
WBGene00017675	F21F3.6
WBGene00009027	F21G4.6
WBGene00009049	F22B8.7
WBGene00009050	F22D6.2
WBGene00017706	F22E5.7
WBGene00009065	F22G12.5
WBGene00017732	F23C8.3
WBGene00017746	F23F1.5
WBGene00017758	F23H11.2
WBGene00000263	F23H11.5
WBGene00017775	F25B5.3
WBGene00017777	F25B5.6
WBGene00017782	F25E5.1
WBGene00017800	F25G6.9
WBGene00009118	F25H2.4
WBGene00009120	F25H2.6
WBGene00009131	F25H8.1
WBGene00009132	F25H8.2
WBGene00009135	F25H9.2
WBGene00009138	F25H9.6
WBGene00009139	F25H9.7
WBGene00017801	F26A1.1
WBGene00017818	F26D11.1
WBGene00009159	F26E4.4
WBGene00017834	F26F12.3
WBGene00009172	F26F2.7
WBGene00017829	F26F4.9
WBGene00017837	F26G1.1
WBGene00009174	F26H9.2
WBGene00017852	F27C1.2
WBGene00017854	F27C1.4
WBGene00009189	F27D4.4
WBGene00009190	F27D4.6
WBGene00009191	F27D4.7
WBGene00017886	F28B3.5
WBGene00009200	F28C1.1
WBGene00009201	F28C1.3
WBGene00017898	F28C10.3
WBGene00044188	F28F8.9
WBGene00009233	F28H6.4
WBGene00017916	F29A7.6
WBGene00017925	F29B9.11
WBGene00017923	F29B9.8
WBGene00009266	F30A10.9
WBGene00017939	F31A3.5
WBGene00009290	F31D4.2
WBGene00009294	F31D4.9
WBGene00017950	F31E3.2
WBGene00017952	F31E3.6
WBGene00017954	F31E8.4
WBGene00009307	F32A11.1
WBGene00009305	F32A7.4
WBGene00009314	F32B4.4
WBGene00009320	F32B6.3
WBGene00017984	F32D1.5
WBGene00009336	F32D8.14
WBGene00009330	F32D8.5
WBGene00009361	F33E2.5
WBGene00018018	F33G12.6
WBGene00009364	F33H1.3
WBGene00009366	F33H2.2
WBGene00009367	F33H2.3
WBGene00009373	F34D10.3
WBGene00009443	F35G12.7
WBGene00009454	F36A2.7
WBGene00009456	F36A2.9
WBGene00018090	F36D4.5
WBGene00018103	F36H5.4
WBGene00018132	F37A4.2
WBGene00018140	F37B4.10
WBGene00018159	F37F2.2
WBGene00009514	F37H8.5
WBGene00009521	F38A1.8
WBGene00018161	F38A5.2
WBGene00009534	F38B7.3
WBGene00009544	F38E11.9
WBGene00009554	F39B2.3
WBGene00018193	F39C12.1
WBGene00018207	F39G3.2
WBGene00018208	F39G3.3
WBGene00009565	F39H11.1
WBGene00018212	F39H12.1
WBGene00009563	F39H2.3
WBGene00018226	F40B5.2
WBGene00009574	F40E10.6
WBGene00009588	F40F11.3
WBGene00018238	F40F4.7
WBGene00044916	F40F8.11
WBGene00077531	F40G9.15
WBGene00018241	F40G9.5
WBGene00018242	F40G9.6
WBGene00018252	F40H3.6
WBGene00023284	F41B5.1
WBGene00018316	F41H10.3
WBGene00018317	F41H10.4
WBGene00018341	F42A10.5
WBGene00018361	F42G8.10
WBGene00018366	F42H10.2
WBGene00018370	F42H10.6
WBGene00018386	F43C11.9
WBGene00009672	F43G9.12
WBGene00018422	F44E2.9
WBGene00206377	F44E5.15
WBGene00009690	F44E5.3
WBGene00009691	F44E5.4
WBGene00009692	F44E5.5
WBGene00018431	F44E7.9
WBGene00009696	F44F1.4
WBGene00009698	F44F1.6
WBGene00009713	F44G4.3
WBGene00009740	F45H10.3
WBGene00009784	F46C5.9
WBGene00018485	F46C8.3
WBGene00018508	F46F11.1
WBGene00018511	F46F11.8
WBGene00018518	F46H5.2
WBGene00018533	F47B7.2
WBGene00009804	F47B8.3
WBGene00018564	F47D12.9
WBGene00009829	F47G9.1
WBGene00018593	F48B9.8
WBGene00018599	F48C1.6
WBGene00018606	F48E3.6
WBGene00009881	F49C12.12
WBGene00009878	F49C12.9
WBGene00018634	F49E7.2
WBGene00018638	F49E8.7
WBGene00009915	F52A8.1
WBGene00044304	F52B10.3
WBGene00009923	F52B5.7
WBGene00018689	F52D2.7
WBGene00018710	F52G3.1
WBGene00018714	F52H2.1
WBGene00018717	F52H2.5
WBGene00018735	F53B1.2
WBGene00009973	F53C11.3
WBGene00009974	F53C11.4
WBGene00009975	F53C11.5
WBGene00018749	F53C3.5
WBGene00018750	F53C3.6
WBGene00018762	F53E10.6
WBGene00009978	F53E4.1
WBGene00018764	F53F10.2
WBGene00009992	F53F4.10
WBGene00009994	F53F4.12
WBGene00010002	F53F8.5
WBGene00018766	F53G2.1
WBGene00018776	F53H1.1
WBGene00018777	F53H1.3
WBGene00018778	F53H1.4
WBGene00010006	F53H2.3
WBGene00010009	F53H4.4
WBGene00018785	F54A3.6
WBGene00010028	F54B11.5
WBGene00018795	F54C4.4
WBGene00010037	F54C8.4
WBGene00175035	F54C9.14
WBGene00018813	F54D11.3
WBGene00195146	F54D5.17
WBGene00010051	F54D5.5
WBGene00018802	F54D8.6
WBGene00010075	F55A11.1
WBGene00018864	F55A12.5
WBGene00206500	F55C9.15
WBGene00018898	F55F10.1
WBGene00018904	F55G1.9
WBGene00010139	F56A8.3
WBGene00018934	F56B3.11
WBGene00018953	F56C9.10
WBGene00018975	F56E10.1
WBGene00010159	F56G4.4
WBGene00010161	F56G4.6
WBGene00010163	F56H6.2
WBGene00010174	F56H9.2
WBGene00010177	F57A8.1
WBGene00010197	F57C2.5
WBGene00010221	F57G12.1
WBGene00010229	F58A4.6
WBGene00010232	F58B3.6
WBGene00010244	F58D5.5
WBGene00019061	F58F12.1
WBGene00010305	F59A2.5
WBGene00019075	F59A3.2
WBGene00010310	F59B2.8
WBGene00010311	F59B2.9
WBGene00019102	F59C12.3
WBGene00045272	F59C12.4
WBGene00010332	F59D12.5
WBGene00235269	F59E12.15
WBGene00010338	F59F4.3
WBGene00013232	faah-4
WBGene00017349	farl-11
WBGene00001497	fars-1
WBGene00001393	fat-1
WBGene00001395	fat-3
WBGene00001396	fat-4
WBGene00001404	fbp-1
WBGene00020450	fbxa-10
WBGene00021264	fbxa-13
WBGene00020853	fbxa-137
WBGene00007162	fbxa-153
WBGene00007837	fbxa-167
WBGene00020363	fbxa-3
WBGene00020883	fbxa-64
WBGene00015885	fbxa-65
WBGene00020457	fbxa-67
WBGene00017962	fbxa-72
WBGene00013453	fbxa-83
WBGene00008847	fbxb-102
WBGene00017208	fbxb-35
WBGene00020537	fbxb-37
WBGene00021773	fbxb-42
WBGene00021774	fbxb-43
WBGene00019416	fbxb-44
WBGene00019705	fbxb-45
WBGene00018444	fbxb-48
WBGene00018104	fbxb-53
WBGene00012492	fbxb-7
WBGene00021204	fbxb-77
WBGene00017116	fbxb-78
WBGene00011267	fbxb-85
WBGene00016359	fbxb-88
WBGene00020361	fbxc-19
WBGene00019927	fbxc-24
WBGene00019926	fbxc-27
WBGene00019922	fbxc-28
WBGene00019921	fbxc-34
WBGene00019918	fbxc-36
WBGene00018456	fbxc-39
WBGene00016295	fbxc-40
WBGene00021576	fbxc-51
WBGene00016710	fbxc-52
WBGene00017744	fbxc-54
WBGene00001406	fce-2
WBGene00018974	fcho-1
WBGene00001411	fem-1
WBGene00019207	fgt-1
WBGene00001423	fib-1
WBGene00014004	fic-1
WBGene00017988	fipp-1
WBGene00001425	fis-2
WBGene00044094	fitm-2
WBGene00001426	fkb-1
WBGene00001427	fkb-2
WBGene00001431	fkb-6
WBGene00001434	fkh-2
WBGene00018998	flap-1
WBGene00017699	flcn-1
WBGene00012435	flh-1
WBGene00016138	flh-2
WBGene00012436	flh-3
WBGene00001443	fli-1
WBGene00019823	fnta-1
WBGene00006465	fntb-1
WBGene00001484	fox-1
WBGene00014177	frg-1
WBGene00021698	frl-1
WBGene00001496	frm-10
WBGene00001489	frm-2
WBGene00001491	frm-4
WBGene00007534	fubl-1
WBGene00022738	fubl-2
WBGene00016489	fubl-3
WBGene00016173	fust-1
WBGene00001508	fut-8
WBGene00001509	fzo-1
WBGene00001510	fzr-1
WBGene00001513	gad-1
WBGene00009823	gadr-6
WBGene00018516	gakh-1
WBGene00008132	gale-1
WBGene00011095	gana-1
WBGene00021238	gap-3
WBGene00001520	gas-1
WBGene00007703	gbf-1
WBGene00001522	gbh-1
WBGene00011503	gcc-2
WBGene00022603	gck-2
WBGene00013382	gcl-1
WBGene00021697	gcn-1
WBGene00013591	gcn-2
WBGene00009918	gcsh-2
WBGene00001561	gei-4
WBGene00001563	gei-6
WBGene00001565	gei-8
WBGene00020442	gen-1
WBGene00019813	ger-1
WBGene00001579	gex-2
WBGene00001580	gex-3
WBGene00001585	gfl-1
WBGene00009246	gfm-1
WBGene00015099	ggtb-1
WBGene00008805	git-1
WBGene00011237	gkow-1
WBGene00001596	gld-2
WBGene00018878	glit-1
WBGene00001604	gln-3
WBGene00006936	glp-4
WBGene00001638	gly-13
WBGene00001645	gly-20
WBGene00001632	gly-7
WBGene00015285	gmeb-1
WBGene00001646	gna-1
WBGene00001649	gob-1
WBGene00002148	gon-14
WBGene00001651	gon-2
WBGene00001660	gop-1
WBGene00020146	got-1.2
WBGene00011511	gpcp-2
WBGene00009165	gpx-1
WBGene00013082	grdn-1
WBGene00001708	grk-1
WBGene00017929	grld-1
WBGene00001743	grp-1
WBGene00001745	gsa-1
WBGene00001746	gsk-3
WBGene00001747	gsp-1
WBGene00001748	gsp-2
WBGene00008117	gsr-1
WBGene00010941	gss-1
WBGene00001764	gst-16
WBGene00001791	gst-43
WBGene00017054	gstk-2
WBGene00010677	gtbp-1
WBGene00014230	gth-2H3
WBGene00001808	gut-2
WBGene00019157	H05C05.1
WBGene00019158	H05C05.2
WBGene00019196	H14A12.3
WBGene00019221	H20J04.6
WBGene00019250	H28G03.2
WBGene00019259	H34C03.2
WBGene00019264	H35B03.2
WBGene00044200	H37A05.4
WBGene00010433	H40L08.1
WBGene00017301	hach-1
WBGene00001812	haf-2
WBGene00001813	haf-3
WBGene00001816	haf-6
WBGene00001817	haf-7
WBGene00044072	ham-3
WBGene00007630	har-1
WBGene00002001	hars-1
WBGene00001824	hbl-1
WBGene00001827	hcf-1
WBGene00001834	hda-1
WBGene00001837	hda-4
WBGene00018319	hda-6
WBGene00016405	hecd-1
WBGene00001840	hel-1
WBGene00021209	hgap-1
WBGene00004101	hgrs-1
WBGene00001844	hid-1
WBGene00001851	hif-1
WBGene00001853	hil-2
WBGene00001854	hil-3
WBGene00001874	him-17
WBGene00011735	hip-1
WBGene00019627	hira-1
WBGene00001898	his-24
WBGene00001946	his-72
WBGene00001949	hlh-2
WBGene00001971	hmg-1.1
WBGene00001972	hmg-1.2
WBGene00001976	hmg-11
WBGene00001974	hmg-4
WBGene00017268	hmgr-1
WBGene00017769	hmgs-1
WBGene00001978	hmp-1
WBGene00001980	hmr-1
WBGene00001815	hmt-1
WBGene00022277	homt-1
WBGene00016704	hosl-1
WBGene00001994	hpk-1
WBGene00001995	hpl-1
WBGene00017982	hpo-18
WBGene00016418	hpo-27
WBGene00021754	hpo-29
WBGene00009744	hpo-35
WBGene00020517	hpo-8
WBGene00015463	hpo-9
WBGene00020403	hrde-4
WBGene00001999	hrp-1
WBGene00002000	hrp-2
WBGene00020936	hrpf-1
WBGene00022253	hrpf-2
WBGene00017816	hrpk-1
WBGene00016624	hrpl-1
WBGene00022134	hrpu-2
WBGene00002002	hsb-1
WBGene00002004	hsf-1
WBGene00002005	hsp-1
WBGene00016250	hsp-110
WBGene00002016	hsp-16.2
WBGene00002018	hsp-16.41
WBGene00002019	hsp-16.48
WBGene00002007	hsp-3
WBGene00002008	hsp-4
WBGene00002010	hsp-6
WBGene00002025	hsp-60
WBGene00002026	hsp-70
WBGene00000915	hsp-90
WBGene00002027	hsr-9
WBGene00002028	hst-1
WBGene00002029	hst-2
WBGene00002031	hst-6
WBGene00019947	htz-1
WBGene00002035	hum-1
WBGene00013740	hut-1
WBGene00010416	hxk-2
WBGene00022306	hxk-3
WBGene00002044	hyl-2
WBGene00015466	hyls-1
WBGene00002152	iars-1
WBGene00012889	icap-1
WBGene00002045	icd-1
WBGene00022042	icd-2
WBGene00007942	idh-2
WBGene00009664	idha-1
WBGene00007993	idhb-1
WBGene00009440	idhg-1
WBGene00002060	ife-2
WBGene00002061	ife-3
WBGene00002062	ife-4
WBGene00004132	ifet-1
WBGene00002064	iff-1
WBGene00002065	iff-2
WBGene00021857	iffb-1
WBGene00002066	ifg-1
WBGene00020130	igcm-2
WBGene00020160	igcm-3
WBGene00022418	igcm-4
WBGene00002070	ile-1
WBGene00002071	ile-2
WBGene00009354	ilkp-1
WBGene00002072	ima-1
WBGene00002074	ima-3
WBGene00002075	imb-1
WBGene00002076	imb-2
WBGene00002077	imb-3
WBGene00007021	immp-1
WBGene00020511	immt-1
WBGene00007979	imp-1
WBGene00011481	imp-2
WBGene00010908	imph-1
WBGene00013122	impt-1
WBGene00002081	ina-1
WBGene00002083	inf-1
WBGene00002120	ins-37
WBGene00016871	inso-1
WBGene00002132	inx-10
WBGene00002124	inx-2
WBGene00002125	inx-3
WBGene00009801	ipla-2
WBGene00022233	ipla-6
WBGene00002147	ire-1
WBGene00007984	irx-1
WBGene00018356	islo-1
WBGene00002162	isp-1
WBGene00010736	istr-1
WBGene00002169	isw-1
WBGene00009966	isy-1
WBGene00006405	itsn-1
WBGene00015326	ivd-1
WBGene00020821	jhdm-1
WBGene00020902	jmjc-1
WBGene00017920	jmjd-1.2
WBGene00012982	jmjd-2
WBGene00017571	jmjd-3.1
WBGene00019279	K01A2.4
WBGene00010481	K01G5.10
WBGene00010478	K01G5.5
WBGene00019294	K02A6.3
WBGene00010502	K02C4.3
WBGene00010504	K02D3.1
WBGene00019317	K02E10.1
WBGene00185118	K02E2.11
WBGene00010507	K02E2.6
WBGene00044903	K03H1.13
WBGene00010550	K04B12.2
WBGene00010552	K04C1.2
WBGene00010553	K04C1.3
WBGene00019380	K04C2.2
WBGene00019381	K04C2.3
WBGene00019394	K04F10.1
WBGene00019396	K04F10.3
WBGene00019399	K04F10.7
WBGene00019400	K04G7.1
WBGene00010579	K05C4.2
WBGene00010580	K05C4.3
WBGene00010583	K05C4.7
WBGene00010585	K05C4.9
WBGene00019408	K05F1.6
WBGene00019429	K06A5.1
WBGene00019456	K06H7.2
WBGene00019458	K06H7.7
WBGene00010619	K07A1.15
WBGene00010610	K07A1.3
WBGene00019467	K07B1.7
WBGene00010625	K07C5.2
WBGene00010629	K07C5.6
WBGene00019490	K07E3.1
WBGene00019491	K07E3.2
WBGene00019498	K07E8.7
WBGene00019510	K07H8.10
WBGene00019522	K08B12.3
WBGene00019537	K08D12.3
WBGene00010670	K08E4.6
WBGene00010687	K08F9.4
WBGene00010691	K08H2.4
WBGene00010704	K09A11.1
WBGene00010711	K09B11.4
WBGene00044698	K09F5.6
WBGene00019611	K10B3.5
WBGene00010731	K10C3.4
WBGene00019631	K10D2.5
WBGene00019633	K10D2.7
WBGene00010744	K10D6.4
WBGene00019657	K11G12.6
WBGene00019664	K11H12.8
WBGene00019680	K12H4.5
WBGene00019686	K12H6.6
WBGene00002181	kal-1
WBGene00002182	kap-1
WBGene00002238	kars-1
WBGene00002183	kat-1
WBGene00009919	kbrl-1
WBGene00006490	kdin-1
WBGene00002184	kel-1
WBGene00002201	kin-18
WBGene00002202	kin-19
WBGene00002190	kin-2
WBGene00002191	kin-3
WBGene00002192	kin-4
WBGene00002215	klc-2
WBGene00002222	klp-11
WBGene00002230	klp-20
WBGene00002233	kqt-1
WBGene00015461	krr-1
WBGene00015742	kxd-1
WBGene00002244	laf-1
WBGene00002247	lam-1
WBGene00016913	lam-2
WBGene00002250	lap-2
WBGene00020097	larp-1
WBGene00003073	lars-1
WBGene00002251	lat-1
WBGene00002253	lbp-1
WBGene00002256	lbp-4
WBGene00021486	lbp-9
WBGene00007137	lcmt-1
WBGene00002261	ldb-1
WBGene00002262	ldh-1
WBGene00017719	ldp-1
WBGene00002278	lep-2
WBGene00002295	let-19
WBGene00002497	let-268
WBGene00006492	let-391
WBGene00002637	let-418
WBGene00002324	let-49
WBGene00002696	let-504
WBGene00002335	let-60
WBGene00002804	let-630
WBGene00002845	let-711
WBGene00002850	let-716
WBGene00002957	let-858
WBGene00002363	let-92
WBGene00010279	letm-1
WBGene00008682	lex-1
WBGene00002981	lgg-2
WBGene00002982	lgg-3
WBGene00018987	lgl-1
WBGene00007711	lid-1
WBGene00015200	lido-13
WBGene00019513	lido-7
WBGene00019511	lido-8
WBGene00002999	lin-10
WBGene00003002	lin-13
WBGene00023497	lin-15B
WBGene00003009	lin-23
WBGene00003011	lin-25
WBGene00003014	lin-28
WBGene00003021	lin-36
WBGene00018572	lin-42
WBGene00003030	lin-45
WBGene00003034	lin-49
WBGene00002994	lin-5
WBGene00003036	lin-53
WBGene00003040	lin-59
WBGene00003041	lin-61
WBGene00001562	lin-66
WBGene00002997	lin-8
WBGene00003043	lip-1
WBGene00008510	lipl-7
WBGene00003045	lir-2
WBGene00003046	lir-3
WBGene00003047	lis-1
WBGene00003048	lit-1
WBGene00015008	lmd-2
WBGene00018700	lmd-3
WBGene00003052	lmn-1
WBGene00003053	lmp-1
WBGene00007390	lmtr-3
WBGene00015492	lnp-1
WBGene00003060	lpd-3
WBGene00003061	lpd-5
WBGene00003062	lpd-6
WBGene00003063	lpd-7
WBGene00003065	lpd-9
WBGene00015779	lrch-1
WBGene00003068	lrk-1
WBGene00020693	lron-8
WBGene00003072	lrp-2
WBGene00003076	lsm-1
WBGene00003078	lsm-4
WBGene00003079	lsm-5
WBGene00003080	lsm-6
WBGene00003081	lsm-7
WBGene00003083	lst-1
WBGene00016889	lst-6
WBGene00045419	lsy-12
WBGene00020287	lsy-13
WBGene00003087	lsy-2
WBGene00009188	lsy-22
WBGene00009834	lsy-27
WBGene00010803	M01B2.10
WBGene00019711	M01E11.2
WBGene00010807	M01E5.4
WBGene00010810	M01F1.4
WBGene00010828	M02B1.3
WBGene00019724	M02B7.2
WBGene00019729	M02D8.3
WBGene00010840	M03C11.3
WBGene00010845	M03C11.8
WBGene00019751	M03D4.4
WBGene00019762	M03F8.3
WBGene00019771	M04F3.5
WBGene00195142	M110.10
WBGene00010913	M110.3
WBGene00010922	M142.5
WBGene00010935	M163.1
WBGene00010943	M176.4
WBGene00010891	M18.6
WBGene00010951	M199.2
WBGene00010896	M28.5
WBGene00019766	M4.1
WBGene00003111	mab-20
WBGene00003100	mab-3
WBGene00017066	maco-1
WBGene00016539	madd-2
WBGene00006517	madd-3
WBGene00013717	madf-10
WBGene00015468	madf-11
WBGene00009461	madf-2
WBGene00016622	mafr-1
WBGene00018230	mage-1
WBGene00010444	magi-1
WBGene00003124	mai-1
WBGene00015248	mai-2
WBGene00007007	mak-2
WBGene00017702	malt-1
WBGene00021888	manf-1
WBGene00008411	mans-1
WBGene00020197	mans-3
WBGene00003415	mars-1
WBGene00011240	mask-1
WBGene00003132	mat-1
WBGene00010406	math-33
WBGene00015609	math-4
WBGene00003144	max-2
WBGene00023409	mbd-2
WBGene00003148	mbf-1
WBGene00003149	mbk-1
WBGene00003150	mbk-2
WBGene00020115	mboa-6
WBGene00008806	mboa-7
WBGene00003153	mca-3
WBGene00009319	mccc-1
WBGene00013096	mcd-1
WBGene00008415	mce-1
WBGene00010420	mcrs-1
WBGene00015676	mct-6
WBGene00007011	mdt-1.2
WBGene00007016	mdt-15
WBGene00007018	mdt-18
WBGene00007019	mdt-19
WBGene00007022	mdt-22
WBGene00016115	mdt-26
WBGene00003170	mec-6
WBGene00012375	mecr-1
WBGene00001569	meg-3
WBGene00003183	mei-1
WBGene00003186	mek-2
WBGene00003209	mel-26
WBGene00003214	mel-32
WBGene00020284	mel-46
WBGene00007128	memb-1
WBGene00019757	memb-2
WBGene00012983	men-1
WBGene00003218	mep-1
WBGene00003221	mes-3
WBGene00016603	met-1
WBGene00014228	mett-10
WBGene00003225	mev-1
WBGene00009671	mfap-1
WBGene00012933	mib-1
WBGene00013462	micu-1
WBGene00003234	mif-1
WBGene00003243	mig-10
WBGene00003245	mig-13
WBGene00003247	mig-15
WBGene00003239	mig-2
WBGene00003253	mig-22
WBGene00009587	mig-38
WBGene00003241	mig-5
WBGene00003242	mig-6
WBGene00019544	miro-1
WBGene00015186	misc-1
WBGene00003367	mix-1
WBGene00011259	miz-1
WBGene00018769	mnat-1
WBGene00011304	mnk-1
WBGene00007139	mnp-1
WBGene00015205	moa-2
WBGene00008601	mob-2
WBGene00016238	mob-4
WBGene00018357	moc-3
WBGene00003389	mog-1
WBGene00003391	mog-3
WBGene00003392	mog-4
WBGene00003393	mog-5
WBGene00008775	mogs-1
WBGene00003396	mom-4
WBGene00003397	mom-5
WBGene00018181	mpdu-1
WBGene00003401	mpk-1
WBGene00022159	mppa-1
WBGene00013880	mppb-1
WBGene00019282	mps-2
WBGene00008409	mpst-1
WBGene00010383	mpst-3
WBGene00006437	mrck-1
WBGene00003406	mrg-1
WBGene00003407	mrp-1
WBGene00003411	mrp-5
WBGene00015133	mrpl-11
WBGene00012361	mrpl-12
WBGene00018475	mrpl-14
WBGene00022373	mrpl-15
WBGene00011412	mrpl-16
WBGene00021829	mrpl-17
WBGene00017044	mrpl-18
WBGene00018932	mrpl-2
WBGene00012992	mrpl-20
WBGene00020796	mrpl-28
WBGene00007712	mrpl-34
WBGene00010812	mrpl-35
WBGene00010783	mrpl-36
WBGene00013004	mrpl-37
WBGene00021327	mrpl-38
WBGene00044344	mrpl-39
WBGene00018793	mrpl-40
WBGene00008514	mrpl-44
WBGene00015092	mrpl-47
WBGene00011247	mrpl-49
WBGene00011740	mrpl-51
WBGene00022045	mrpl-55
WBGene00015025	mrpl-9
WBGene00012556	mrps-10
WBGene00010624	mrps-15
WBGene00018961	mrps-16
WBGene00015487	mrps-17
WBGene00022583	mrps-18A
WBGene00011759	mrps-18B
WBGene00014224	mrps-23
WBGene00023487	mrps-24
WBGene00021920	mrps-25
WBGene00012830	mrps-28
WBGene00010905	mrps-34
WBGene00012697	mrps-35
WBGene00020037	mrps-6
WBGene00013324	mrps-7
WBGene00017319	mrps-9
WBGene00020625	mrrf-1
WBGene00018395	mtch-1
WBGene00003476	mtm-3
WBGene00003477	mtm-5
WBGene00003479	mtm-9
WBGene00012342	mtr-4
WBGene00019800	mtss-1
WBGene00009559	mtx-1
WBGene00011323	mut-15
WBGene00003508	mut-16
WBGene00015508	mvb-12
WBGene00021534	mvk-1
WBGene00003510	mxl-2
WBGene00004134	myrf-1
WBGene00008999	myrf-2
WBGene00007029	mys-1
WBGene00007914	mys-4
WBGene00044431	mzt-1
WBGene00017075	nap-1
WBGene00021370	nape-2
WBGene00003815	nars-1
WBGene00007500	nasp-1
WBGene00008218	nasp-2
WBGene00022394	natb-1
WBGene00020719	natc-1
WBGene00018866	nath-10
WBGene00043064	nbet-1
WBGene00022453	ncap-1
WBGene00018156	ncbp-1
WBGene00006410	nck-1
WBGene00003559	ncl-1
WBGene00010958	ndfl-4
WBGene00009119	ndk-1
WBGene00009051	nduf-6
WBGene00012376	nduf-7
WBGene00010959	nduo-1
WBGene00010961	nduo-2
WBGene00010966	nduo-3
WBGene00010963	nduo-4
WBGene00010967	nduo-5
WBGene00010957	nduo-6
WBGene00003583	ndx-6
WBGene00003587	ned-8
WBGene00003592	nfi-1
WBGene00003593	nfm-1
WBGene00007048	nfx-1
WBGene00011614	nfya-1
WBGene00017742	nfyc-1
WBGene00003596	ngp-1
WBGene00003599	nhl-3
WBGene00003600	nhr-1
WBGene00003609	nhr-10
WBGene00003616	nhr-17
WBGene00018622	nhr-190
WBGene00003619	nhr-20
WBGene00020852	nhr-228
WBGene00022805	nhr-256
WBGene00021522	nhr-274
WBGene00003625	nhr-31
WBGene00003603	nhr-4
WBGene00003630	nhr-40
WBGene00003632	nhr-42
WBGene00003637	nhr-47
WBGene00003654	nhr-64
WBGene00003659	nhr-69
WBGene00003660	nhr-70
WBGene00003668	nhr-78
WBGene00003678	nhr-88
WBGene00003685	nhr-95
WBGene00003732	nhx-4
WBGene00003738	nid-1
WBGene00011408	nifk-1
WBGene00021820	nipa-1
WBGene00010700	nipi-3
WBGene00010984	nkat-3
WBGene00012543	nkcc-1
WBGene00003742	nlp-4
WBGene00003772	nlr-1
WBGene00017304	nmad-1
WBGene00020549	nmt-1
WBGene00003777	nmy-2
WBGene00011647	noca-1
WBGene00020297	nog-1
WBGene00017989	nol-10
WBGene00021660	nol-14
WBGene00013958	nol-16
WBGene00021073	nol-2
WBGene00010627	nol-56
WBGene00020915	nol-58
WBGene00021789	nol-6
WBGene00010709	nol-9
WBGene00017778	nono-1
WBGene00003785	nos-3
WBGene00013347	nova-1
WBGene00007496	npax-4
WBGene00019120	npl-4.1
WBGene00019121	npl-4.2
WBGene00003787	npp-1
WBGene00003796	npp-10
WBGene00003797	npp-11
WBGene00003798	npp-12
WBGene00003799	npp-13
WBGene00003800	npp-14
WBGene00003801	npp-15
WBGene00003802	npp-16
WBGene00003804	npp-18
WBGene00003805	npp-19
WBGene00003788	npp-2
WBGene00003806	npp-20
WBGene00019940	npp-21
WBGene00007493	npp-23
WBGene00003789	npp-3
WBGene00003791	npp-5
WBGene00003792	npp-6
WBGene00003793	npp-7
WBGene00003794	npp-8
WBGene00003795	npp-9
WBGene00018635	nprl-2
WBGene00011488	nra-2
WBGene00007651	nra-3
WBGene00015344	nra-4
WBGene00017004	nrd-1
WBGene00011333	nrde-2
WBGene00019862	nrde-3
WBGene00001584	nrde-4
WBGene00003818	nsf-1
WBGene00003821	nst-1
WBGene00008237	nstp-10
WBGene00013151	nsun-5
WBGene00003822	nsy-1
WBGene00013530	ntl-11
WBGene00003825	ntl-2
WBGene00003826	ntl-3
WBGene00003827	ntl-4
WBGene00008225	nuaf-1
WBGene00009674	nucb-1
WBGene00011230	nud-2
WBGene00003830	num-1
WBGene00003831	nuo-1
WBGene00020417	nuo-2
WBGene00013308	nuo-3
WBGene00012166	nuo-6
WBGene00009180	nurf-1
WBGene00022748	oaz-1
WBGene00014215	obr-3
WBGene00016331	obr-4
WBGene00007620	ocrl-1
WBGene00003851	odr-4
WBGene00020596	oga-1
WBGene00003858	ogt-1
WBGene00007260	olrn-1
WBGene00003868	ooc-3
WBGene00003870	ooc-5
WBGene00011638	ostb-1
WBGene00019693	ostd-1
WBGene00021733	otub-2
WBGene00003901	paa-1
WBGene00003902	pab-1
WBGene00003903	pab-2
WBGene00003904	pabp-2
WBGene00003905	pad-1
WBGene00008338	pafo-1
WBGene00003911	pak-1
WBGene00006443	pak-2
WBGene00003915	pan-1
WBGene00017951	panl-2
WBGene00014015	panl-3
WBGene00016610	paqr-1
WBGene00021313	paqr-2
WBGene00003916	par-1
WBGene00003920	par-5
WBGene00003924	pas-3
WBGene00003925	pas-4
WBGene00003926	pas-5
WBGene00003927	pas-6
WBGene00011908	pash-1
WBGene00003930	pat-3
WBGene00003931	pat-4
WBGene00003932	pat-6
WBGene00009661	patr-1
WBGene00007042	pbrm-1
WBGene00003947	pbs-1
WBGene00003948	pbs-2
WBGene00003950	pbs-4
WBGene00003952	pbs-6
WBGene00003953	pbs-7
WBGene00021636	pcaf-1
WBGene00017864	pcca-1
WBGene00018701	pccb-1
WBGene00020092	pcf-11
WBGene00003954	pcm-1
WBGene00003960	pcs-1
WBGene00017241	pcyt-1
WBGene00011268	pde-12
WBGene00011146	pde-2
WBGene00015413	pdhb-1
WBGene00003962	pdi-1
WBGene00003963	pdi-2
WBGene00003964	pdi-3
WBGene00015168	pdi-6
WBGene00003965	pdk-1
WBGene00022832	pdp-1
WBGene00003967	pdr-1
WBGene00003970	pek-1
WBGene00017766	peli-1
WBGene00011280	pelo-1
WBGene00003975	pen-2
WBGene00022776	perm-3
WBGene00007505	pezo-1
WBGene00007443	pfd-1
WBGene00006889	pfd-3
WBGene00020112	pfd-5
WBGene00009004	pfd-6
WBGene00019295	pfkb-1.2
WBGene00011051	pfs-2
WBGene00019941	pgam-5
WBGene00011239	pges-2
WBGene00020185	pgk-1
WBGene00004014	phb-1
WBGene00004015	phb-2
WBGene00013339	phf-14
WBGene00021810	phf-15
WBGene00009025	phf-34
WBGene00009455	phip-1
WBGene00008431	piga-1
WBGene00021840	pign-1
WBGene00009552	piki-1
WBGene00011967	pir-1
WBGene00012897	pisy-1
WBGene00010776	pix-1
WBGene00009793	pkn-1
WBGene00004039	plc-4
WBGene00004040	pld-1
WBGene00004046	plp-1
WBGene00008976	plp-2
WBGene00006481	plrg-1
WBGene00004047	plx-1
WBGene00004060	pmp-3
WBGene00011308	pnn-1
WBGene00004075	pod-1
WBGene00004077	pop-1
WBGene00017064	ppfr-2
WBGene00021425	ppgn-1
WBGene00004085	pph-4.1
WBGene00012665	pph-5
WBGene00004087	ppk-1
WBGene00006460	ppm-1.A
WBGene00018362	ppm-1.G
WBGene00011953	ppm-2
WBGene00012348	pptr-1
WBGene00007554	pptr-2
WBGene00020647	pqbp-1.1
WBGene00004110	pqn-20
WBGene00004111	pqn-21
WBGene00004116	pqn-27
WBGene00004128	pqn-41
WBGene00004138	pqn-53
WBGene00004143	pqn-59
WBGene00004148	pqn-65
WBGene00004151	pqn-68
WBGene00004152	pqn-70
WBGene00004166	pqn-85
WBGene00004167	pqn-87
WBGene00017070	praf-3
WBGene00004178	prg-1
WBGene00013766	prmt-1
WBGene00011939	prmt-9
WBGene00018625	prp-17
WBGene00020423	prp-19
WBGene00004188	prp-21
WBGene00022458	prp-31
WBGene00007972	prp-4
WBGene00013343	prp-6
WBGene00004187	prp-8
WBGene00004186	prpf-4
WBGene00004201	prx-19
WBGene00004214	ptp-2
WBGene00004235	ptr-21
WBGene00004121	ptrn-1
WBGene00014165	puf-12
WBGene00004245	puf-9
WBGene00019628	pup-2
WBGene00004248	pus-1
WBGene00007982	pxd-1
WBGene00004254	pxf-1
WBGene00004257	pxn-2
WBGene00020696	pygl-1
WBGene00008149	pyp-1
WBGene00001336	qars-1
WBGene00019808	R01B10.6
WBGene00010975	R01H10.7
WBGene00019812	R01H2.4
WBGene00019824	R02D3.7
WBGene00010976	R02D5.1
WBGene00019841	R02F11.3
WBGene00019831	R02F2.1
WBGene00019836	R02F2.7
WBGene00019838	R02F2.9
WBGene00019843	R03E9.2
WBGene00019847	R03G5.6
WBGene00044281	R04A9.7
WBGene00019871	R04E5.8
WBGene00019872	R04E5.9
WBGene00011015	R04F11.2
WBGene00011017	R04F11.5
WBGene00019884	R05D3.12
WBGene00019877	R05D3.2
WBGene00019881	R05D3.8
WBGene00019898	R05G6.4
WBGene00011040	R05H5.5
WBGene00011059	R06C1.4
WBGene00023418	R06F6.12
WBGene00011071	R06F6.8
WBGene00011092	R07B7.8
WBGene00019937	R07E4.3
WBGene00019938	R07E4.5
WBGene00011115	R07E5.7
WBGene00019943	R07G3.7
WBGene00011128	R07H5.8
WBGene00011139	R08B4.3
WBGene00011142	R08D7.1
WBGene00011144	R08D7.4
WBGene00019959	R08E3.3
WBGene00011300	R107.5
WBGene00011194	R10D12.13
[truncated: 1,149 more rows]

## Sheet: ETS+HD+PBX signature
Dopaminergic signature ETS+HD+PBX
700 bp maximu size of window
% DA genes with signature	100
mean % of 10.000 random sets	99992
300 bp maximu size of window
% DA genes with signature	100
mean % of 10.000 random sets	99989
150 bp maximu size of window
% DA genes with signature	100
mean % of 10.000 random sets	99974
