# Supplementary material for: Joint actions of diverse transcription factor families establish neuron-type identities and promote enhancer selectivity
Source: HighWire-hosted journal article supplement (doi:10.1101/gr.275623.121), 2022-01-24
Supplement: Supplemental_Table_S8.xlsx [file Supplemental_Table_S8.xlsx]

## Sheet: Figures
Figure 2C
Strain	Genotype	% CEPV ON	% CEPV FAINT	p-val	% CEPD ON	% CEPD FAINT	p-val	% ADE ON	% ADE FAINT	p-val	% PDE ON	% PDE FAINT	p-val	N (neurons)	Age	Tª
PHX4741	dat-1(syb4741) III	100	0	-	100	0	-	100	0	-	100	0	-	100	L4/YA	25ºC
NFB2526	dat-1(syb4741) III; unc-62(e917) V	100	0	-	100	0	-	31	39	<0.0001	67	0	<0.0001	100	L4/YA	25ºC
		% CEPs ON			% CEPs EXTRA		p-val
NFB2527	dat-1(syb4741) III; vab-3(ot346) X	30			44		<0.0001	94	0	-	100	0	-	100	L4/YA	25ºC
Figure 2E
Strain	Genotype	% CEPV ON	% CEPV FAINT	p-val	% CEPD ON	% CEPD FAINT	p-val	% ADE ON	% ADE FAINT	p-val	% PDE ON	% PDE FAINT	p-val	N (neurons)	Age	Tª
PHX4698	cat-2(syb4698) II	100	0	-	100	0	-	100	0	-	100	0	-	100	L4/YA	25ºC
NFB2524	cat-2(syb4698) II; unc-62(e917) V	96	2	-	100	0	-	57	28	<0.0001	60	2	<0.0001	100	L4/YA	25ºC
		% CEPs ON			% CEPs EXTRA		p-val
NFB2500	cat-2(syb4698) II; vab-3(ot346) X	38			32		<0.0001	90	0	0.0015	99	0	-	100	L4/YA	25ºC
Figure 2G
Strain	Genotype	% CEPV ON	% CEPV FAINT	p-val	% CEPD ON	% CEPD FAINT	p-val	% ADE ON	% ADE FAINT	p-val	% PDE ON	% PDE FAINT	p-val	N (neurons)	Age	Tª
OH15039	pha-1(e2123) III; him-5(e1490) V; otIs625 [cat-1(fosmid)::SL2::mCherry::H2B + pha-1(+)]	100	0	-	100	0	-	100	0	-	95	0	-	100	L4/YA	25ºC
NFB2498	pha-1(e2123) III; him-5(e1490) V; unc-62(e917) V; otIs625 [cat-1(fosmid)::SL2::mCherry::H2B + pha-1(+)]	65	0	<0.0001	66	0	<0.0001	68	0	<0.0001	54	0	<0.0001	100	L4/YA	25ºC
NFB2521	pha-1(e2123) III; him-5(e1490) V; vab-3(ot346) X; otIs625 [cat-1(fosmid)::SL2::mCherry::H2B + pha-1(+)]	-					-	68	0	<0.0001	75	0	<0.0001	100	L4/YA	25ºC
Figure 2F
Strain	Genotype	% CEPV ON	% CEPV FAINT	p-val	% CEPD ON	% CEPD FAINT	p-val	% ADE ON	% ADE FAINT	p-val	% PDE ON	% PDE FAINT	p-val	N (neurons)	Age	Tª
OH8250	otIs225(cat-4::gfp) II	97	0	-	96	0	-	98	0	-	95	0	-	100	L4/YA	25ºC
NFB1200	otIs225[cat-4::gfp] II; unc-62(e917) V	94	0	-	98	0	-	83	0	<0.0001	64	0	<0.0001	100	L4/YA	25ºC
NFB872	otIs225[cat-4::gfp] II; vab-3(ot346) X	-					-	68	0	<0.0001	100	0	-	100	L4/YA	25ºC
Figure 3A
Strain	Genotype	% CEPV ON	% CEPV FAINT	p-val	% CEPD ON	% CEPD FAINT	p-val	% ADE ON	% ADE FAINT	p-val	% PDE ON	% PDE FAINT	p-val	N (neurons)	Age	Tª
PHX4741	dat-1(syb4741) III	100	0	-	100	0	-	100	0	-	100	0	-	100	L4/YA	25ºC
NFB2556	vlcEx1325(dat-1::unc-62[sense]; dat-1::unc-62[antisense]; ttx-3::mCherry; rol-6(su1006)); dat-1(syb4741) III	13	72	<0.0001	13	75	0.0003	73	18	0.0032	60	28	0.0003	100	L4/YA	25ºC
NFB2554	vlcEx1323(dat-1::vab-3[sense]; dat-1::vab-3[antisense]; ttx-3::mCherry; rol-6(su1006)); dat-1(syb4741) III	16	51	<0.0001	17	50	<0.0001	72	15	0.0007	86	11	-	100	L4/YA	25ºC
Figure 3B
Strain	Genotype	% CEPV ON	% CEPV FAINT	p-val	% CEPD ON	% CEPD FAINT	p-val	% ADE ON	% ADE FAINT	p-val	% PDE ON	% PDE FAINT	p-val	N (neurons)	Age	Tª
PHX4698	cat-2(syb4698) II	100	0	-	100	0	-	100	0	-	100	0	-	100	L4/YA	25ºC
NFB2555	vlcEx1325(dat-1::unc-62[sense]; dat-1::unc-62[antisense]; ttx-3::mCherry; rol-6(su1006)); cat-2(syb4698) II	0	1	<0.0001	0	1	<0.0001	7	6	<0.0001	16	16	<0.0001	100	L4/YA	25ºC
NFB2553	vlcEx1325(dat-1::unc-62[sense]; dat-1::unc-62[antisense]; ttx-3::mCherry; rol-6(su1006)); cat-2(syb4698) II	7	5	<0.0001	12	5	<0.0001	19	40	<0.0001	39	18	<0.0001	100	L4/YA	25ºC
Figure 4B
Strain	Genotype	% CEPV ON	Value	% CEPD ON	Value	% ADE ON	Value	% PDE ON	Value	N (neurons)	Age	Tª
NFB2186	vlcEx1166[cat-2prom21::gfp, rol-6]	100	-	98	-	88	-	50	-	60	L4/YA	25ºC
NFB2187	vlcEx1167[cat-2prom21::gfp, rol-6]	93	-	92	-	87	-	28	-	60	L4/YA	25ºC
Line 3	[cat-2prom21::gfp, rol-6]	97	-	85	-	73	-	45	-	60	L4/YA	25ºC
NFB833	vlcEx461[Mcat-2prom2::gfp, rol-6]	72	+	3	—	0	—	0	—	60	L4/YA	25ºC
NFB1093	vlcEx602[Mcat-2prom2::gfp, rol-6]	85	+	0	—	0	—	0	—	60	L4/YA	25ºC
Line 3	[Mcat-2prom2::gfp, rol-6]	83	+	8	—	13	—	8	—	60	L4/YA	25ºC
NFB905	vlcEx492[Mcat-2prom-3::gfp, rol-6]	80	+	0	—	0	—	0	—	60	L4/YA	25ºC
NFB906	vlcEx493[Mcat-2prom-3::gfp, rol-6]	73	+	0	—	0	—	0	—	60	L4/YA	25ºC
Line 3	[Mcat-2prom-3::gfp, rol-6]	70	+	0	—	0	—	0	—	60	L4/YA	25ºC
Figure 4B
Strain	Genotype	% CEPV ON	% CEPV FAINT	p-val	% CEPD ON	% CEPD FAINT	p-val	% ADE ON	% ADE FAINT	p-val	% PDE ON	% PDE FAINT	p-val	N (neurons)	Age	Tª
PHX4698	cat-2(syb4698) II	100	0	-	100	0	-	100	0	-	100	0	-	100	L4/YA	25ºC
NFB2565	cat-2(syb4698 syb5072) II	0	0	<0.0001	0	0	<0.0001	0	0	<0.0001	99	0	-	100	L4/YA	25ºC
NFB2566	cat-2(syb4698 syb5026) II	0	0	<0.0001	0	0	<0.0001	0	0	<0.0001	100	0	-	100	L4/YA	25ºC

## Sheet: SupFigures
Supplementary Figure 1
Strain	Genotype	Treatment	% CEPV ON	% CEPD ON	% ADE ON	% PDE ON	% NSM ON	% ADF ON	% RIC ON	% RIM ON	% HSN ON	% VC4 ON	% VC5 ON	N (neurons)
NFB753	rrf-3(pk1426) II; otIs181[dat-1::mCherry + ttx-3::mCherry] III; lin-15B(n765) X; vsIs97[tph-1p::DsRed2 + lin-15(+)] X; otIs224[cat-1::gfp]	L4440	100	100	100	97	100	99	100	97	98	100	100	60
NFB753	rrf-3(pk1426) II; otIs181[dat-1::mCherry + ttx-3::mCherry] III; lin-15B(n765) X; vsIs97[tph-1p::DsRed2 + lin-15(+)] X; otIs224[cat-1::gfp]	gfp RNAi	64	70	40	15	70	15	25	8	14	10	8	60
Supplementary Figure 2
Strain	Genotype	% PDER = 1	% PDER > 1	N (neurons)	Age	Tª
OH8246	otIs221(cat-1::gfp) III	100	0	100	L4/YA	20ºC
NFB2340	otIs221(cat-1::gfp) III; hbl-1(mg285) X	91	5	100	L4/YA	20ºC
NFB2080	otIs221(cat-1::gfp) III; lin-14(n179) X	47	0	100	L4/YA	20ºC
NFB2385	otIs221[cat-1::gfp] III; vab-15(u781) X	17	0	100	L4/YA	20ºC
NFB882	otIs221[cat-1::gfp] III; unc-62(e917) V	66	0	100	L4/YA	20ºC
Strain	Genotype	% PVDR = 1	% PVDR > 1	N (neurons)	Age	Tª
NFB2479	otIs287[rab-3(prom1)::2xNLS::YFP+rol-6(su1006)] IV; vsIs33(dop-3::RFP) V	100	0	100	L4/YA	20ºC
OH10425	otIs337[unc-86fos::NLS::YFP::H2B; ttx-3::mCherry]	92	0	100	L4/YA	25ºC
NFB2491	otIs287[rab-3(prom1)::2xNLS::YFP+rol-6(su1006)] IV; vsIs33(dop-3::RFP) V; hbl-1(mg285) X	44	0	100	L4/YA	20ºC
NFB2495	otIs287[rab-3(prom1)::2xNLS::YFP+rol-6(su1006)] IV; vsIs33(dop-3::RFP) V; lin-14(n179) X	64	5	100	L4/YA	20ºC
NFB2497	otIs287[rab-3(prom1)::2xNLS::YFP+rol-6(su1006)] IV; vsIs33(dop-3::RFP) V; vab-15(u781) X	61	8	100	L4/YA	20ºC
NFB2490	otIs337[unc-86fos::NLS::YFP::H2B; ttx-3::mCherry]; unc-62(e917) V	52	0	100	L4/YA	25ºC
Strain	Genotype	% PDER/PVDR = 2	% PDER/PVDR > 2	N (neurons)	Age	Tª
NFB2479	otIs287[rab-3(prom1)::2xNLS::YFP+rol-6(su1006)] IV; vsIs33(dop-3::RFP) V	100	0	100	L4/YA	20ºC
OH10689	otIs355 [rab-3p(prom1)::2xNLS::TagRFP] IV	100	0	100	L4/YA	25ºC
NFB2491	otIs287[rab-3(prom1)::2xNLS::YFP+rol-6(su1006)] IV; vsIs33(dop-3::RFP) V; hbl-1(mg285) X	52	8	100	L4/YA	20ºC
NFB2495	otIs287[rab-3(prom1)::2xNLS::YFP+rol-6(su1006)] IV; vsIs33(dop-3::RFP) V; lin-14(n179) X	90	8	100	L4/YA	20ºC
NFB2497	otIs287[rab-3(prom1)::2xNLS::YFP+rol-6(su1006)] IV; vsIs33(dop-3::RFP) V; vab-15(u781) X	47	12	100	L4/YA	20ºC
NFB2489	otIs355 [rab-3p(prom1)::2xNLS::TagRFP] IV; unc-62(e917) V	71	0	100	L4/YA	25ºC
Supplementary Figure 4
Strain	Genotype	Treatment	% CEPV ON	% CEPD ON	% ADE ON	% PDE ON	N (neurons)
NFB753	rrf-3(pk1426) II; otIs181[dat-1::mCherry + ttx-3::mCherry] III; lin-15B(n765) X; vsIs97[tph-1p::DsRed2 + lin-15(+)] X; otIs224[cat-1::gfp]	L4440	100	100	100	98	60
NFB753	rrf-3(pk1426) II; otIs181[dat-1::mCherry + ttx-3::mCherry] III; lin-15B(n765) X; vsIs97[tph-1p::DsRed2 + lin-15(+)] X; otIs224[cat-1::gfp]	ast-1/ETS RNAi	91	92	67	65	60
NFB753	rrf-3(pk1426) II; otIs181[dat-1::mCherry + ttx-3::mCherry] III; lin-15B(n765) X; vsIs97[tph-1p::DsRed2 + lin-15(+)] X; otIs224[cat-1::gfp]	ceh-43/HD RNAi	75	73	70	78	60
NFB753	rrf-3(pk1426) II; otIs181[dat-1::mCherry + ttx-3::mCherry] III; lin-15B(n765) X; vsIs97[tph-1p::DsRed2 + lin-15(+)] X; otIs224[cat-1::gfp]	ceh-20/HD RNAi	98	100	79	75	60
Supplementary Figure 5
Strain	Genotype	% CEPV ON	% CEPD ON	% ADE ON	% PDE ON	N (neurons)
OH7547	otIs199(cat-2::gfp, rgef-1(F25B3.3)::dsred, rol-6) I	97	100	98	98	100
NFB881	otIs199[cat-2p::gfp, rgef-1(F25B3.3)p::dsred, rol-6(su1006)] I; unc-62(mu232) muIs35[mec-7p::gfp + lin-15(+)] V	92	90	83	97	100
-	nIs118(cat-2::gfp)	100	96	98	98	100
NFB883	unc-62(e917) V; nIs118(cat-2p::gfp)	88	90	70	70	100
		% CEPs ON	% CEPs EXTRA
NFB885	unc-62(e644) dpy-11(e224) V; nIs118(cat-2p::gfp)	35	5	78	90	100
NFB826	otIs199[cat-2p::gfp, rgef-1(F25B3.3)p::dsred, rol-6(su1006)] I; vab-3(ot346) X	20	45	85	85	100
OH8246	otIs221(cat-1::gfp) III	100	100	98	98	100
NFB882	otIs221(cat-1::gfp) III; unc-62(e917) V	87	90	88	66	100
NFB874	otIs221(cat-1::gfp) III; vab-3(ot346) X	-		93	98	100
OH8251	otIs226(bas-1::gfp) IV	98	98	97	97	100
NFB1199	otIs226(bas-1::gfp) IV; unc-62(e917) V	100	100	85	72	100
NFB873	otIs226(bas-1::gfp) IV; vab-3(ot346) X	-		88	100	100
OH8510	otIs236(asic-1prom1::gfp)	98	100	98	97	100
NFB1210	unc-62(e917) V; otIs236 (asic-1prom::gfp)	94	94	72	75	100
		% CEPs ON	% CEPs EXTRA
NFB2028	vab-3(ot346) X; otIs236(asic-1prom1::gfp)	15	75	100	100	100
BY200	vtIs1[dat-1p::gfp, rol-6(su1006)] V	100	100	100	100	100
NFB2299	vtIs1[dat-1p::gfp, rol-6(su1006)], unc-62(e917) V	100	100	97	63	100
		% CEPs ON	% CEPs EXTRA
NFB875	vtIs1[dat-1p::gfp, rol-6(su1006)] V; vab-3(ot346) X	30	45	100	100	100
Supplementary Figure 6
Strain	Genotype	2 rab-3(+) cell	1 rab-3(+) cell	N (neurons)
NFB2297	otIs355[rab-3p(prom1)::2xNLS::tagRFP] IV; nIs118[cat-2p::gfp]	28	2	30
NFB2298	otIs355[rab-3p(prom1)::2xNLS::tagRFP] IV; unc-62(e917) V; nIs118[cat-2p::gfp]	22	3	30
Strain	Genotype	PDE ift-20(+)	PDE ift-20(-)	N (neurons)
NFB26	otIs395(ift-20p::tagRFP) III; vtIs1[dat-1p::gfp, rol-6(su1006)] V	96	4	100
NFB2033	otIs395(ift-20p::tagRFP) III; vtIs1[dat-1p::gfp, rol-6(su1006)], unc-62(e917) V	63	37	100
Strain	Genotype	% URX ON	% URX EXTRA	N (neurons)
ZG629	iaIs22[gcy-36p::gfp + unc-119(+)]	97	0	100
NFB2257	vab-3(ot346) X; iaIs22[gcy-36p::gfp + unc-119(+)]	0	100	100
Strain	Genotype	% AIM ON	% AIM EXTRA	N (neurons)
NFB1719	vlcIs7(mod-5p::T2A::mneongreen) I	95	0	100
NFB2296	vlcIs7(mod-5p::T2A::mneongreen) I; vab-3(ot346) X	10	59	100
Supplementary Figure 7
Strain	Genotype	% ADE ON	N (neurons)
NFB2296	vlcIs7(mod-5p::T2A::mNeonGreen) I; vab-3(ot346) X	65	100
NFB2243	vlcEx1200[dat-1p(prom1)::vab-3 cDNA, unc-122p::gfp, gDNA]; otIs199[cat-2p::gfp, rgef-1(F25B3.3)p::dsred, rol-6(su1006)] I; vab-3(ot346) X	90	100
NFB2244	vlcEx1201[dat-1p(prom1)::vab-3 cDNA, unc-122p::gfp, gDNA]; otIs199[cat-2p::gfp, rgef-1(F25B3.3)p::dsred, rol-6(su1006)] I; vab-3(ot346) X	83	100
NFB2251	vlcEx1208[dat-1p(prom1)::Pax6 cDNA, unc-122p::gfp, gDNA]; otIs199[cat-2p::gfp, rgef-1(F25B3.3)p::dsred, rol-6(su1006)] I; vab-3(ot346) X	96	100
NFB2252	vlcEx1209[dat-1p(prom1)::Pax6 cDNA, unc-122p::gfp, gDNA]; otIs199[cat-2p::gfp, rgef-1(F25B3.3)p::dsred, rol-6(su1006)] I; vab-3(ot346) X	100	100

## Sheet: Signature
Strain	Genotype	CEPV R	CEPV RG	CEPD R	CEPD RG	ADE R	ADE RG	PDE R	PDE RG	N (worms)	Lenght (bp)	Distance from ATG	CGs (%)	DA expression	Expression pattern
NFB2532	vlcEx1311(ace-1::NLS::eGFP; rol-6(su1006)); otIs181(dat-1::mCherry, ttx-3::mCherry) III	1	0.5	0.9667	0.4	1	0.1	1	0.6833	30	978	-490	35	YES	It seems to be eminently muscular (pharynx, intestine). In the pharynx, polygonal nuclei can be seen at the beginning of each bulb, probably embedded.
NFB2533	vlcEx1312(ace-1::NLS::eGFP; rol-6(su1006)); otIs181(dat-1::mCherry, ttx-3::mCherry) III	0.9833	0.4167	0.9333	0.45	0.9833	0.0667	0.9833	0.7667	30
NFB2511	vlcEx1303(asic-1::NLS::eGFP; rol-6(su1006)); otIs181(dat-1::mCherry, ttx-3::mCherry) III	1	0	0.98	0	1	0	1	0	30	740	-2651	34	NO	No ttx-3 or DA colocalization. Consistent expression in a pair of cells located between ventral and dorsal CEPs
NFB2534	vlcEx1313(asic-1::NLS::eGFP; rol-6(su1006)); otIs181(dat-1::mCherry, ttx-3::mCherry) III	1	0	1	0	1	0	1	0	30
NFB2510	vlcEx1302(ceh-43::NLS::eGFP; rol-6(su1006)); otIs181(dat-1::mCherry, ttx-3::mCherry) III	0.97	0	1	0	1	0	0.98	0	30	758	-9054	35	NO	No ttx-3 or DA colocalization. Not all the worms express GFP. When they do, it appears brilliant in a pair of cells located between ventral and dorsal CEPs
NFB2531	vlcEx1310(ceh-43::NLS::eGFP; rol-6(su1006)); otIs181(dat-1::mCherry, ttx-3::mCherry) III	1	0	1	0	1	0	1	0	30
NFB2513	vlcEx1305(dop-2::NLS::eGFP; rol-6(su1006)); otIs181(dat-1::mCherry, ttx-3::mCherry) III	1	0	0.95	0	0.98	0	0.98	0	30	760	1131	43	NO	It's expressed within the neurons in the ventral nerve cord. Also in a pair located between ventral and dorsal CEPs and another pair located near ttx-3(+) neurons. Another pair in the tail and about four cells around the ventral ganglion can also be seen.
NFB2537	vlcEx1316(dop-2::NLS::eGFP; rol-6(su1006)); otIs181(dat-1::mCherry, ttx-3::mCherry) III	0.98	0	0.88	0	1	0	1	0	30
NFB2512	vlcEx1304(dop-2::NLS::eGFP; rol-6(su1006)); otIs181(dat-1::mCherry, ttx-3::mCherry) III	1	0	0.98	0	1	0	1	0	30	824	-588	21	NO	Normally, two pairs of cells are observed: one very close to the ventral CEPs and another one literally next to the dorsal CEPs. Another pair can be seen in the Amphids' region, close and anterior to the ttx-3(+).
NFB2536	vlcEx1315(dop-2::NLS::eGFP; rol-6(su1006)); otIs181(dat-1::mCherry, ttx-3::mCherry) III	1	0	0.97	0	0.98	0	1	0	30
NFB2517	vlcEx1309(F59F3.6::NLS::eGFP; rol-6(su1006)); otIs181(dat-1::mCherry, ttx-3::mCherry) III	0.95	0.8	0.9	0.67	0.72	0.6	0.97	0.75	30	1061	1082.5	31	YES	No ttx-3 colocalization. Around 12 nuclei can be observed surrounding the labial neurons' region.
NFB2538	vlcEx1317(F59F3.6::NLS::eGFP; rol-6(su1006)); otIs181(dat-1::mCherry, ttx-3::mCherry) III	0.97	0.92	0.95	0.77	0.92	0.82	1	0.43	30
NFB2535	vlcEx1314(K10C2.2-1::NLS::eGFP; rol-6(su1006)); otIs181(dat-1::mCherry, ttx-3::mCherry) III	1	0	1	0	1	0	1	0	30	902	-1369	36	NO	No ttx-3 or DA colocalization. Very few worms express GFP. When they do, a faint pair close to the CEPs can be seen.
NFB2509	vlcEx1301(K10C2.2::NLS::eGFP; rol-6(su1006)); otIs181(dat-1::mCherry, ttx-3::mCherry) III	1	0	0.98	0	1	0	1	0	30
NFB2514	vlcEx1306(mca-2::NLS::eGFP; rol-6(su1006)); otIs181(dat-1::mCherry, ttx-3::mCherry) III	1	0	1	0	1	0	0.98	0	30	1055	-3160.5	33	NO	No ttx-3 or DA colocalization. It is common to see 2 green cells above the second bulb and the nerves connecting them.
NFB2539	vlcEx1318(mca-2::NLS::eGFP; rol-6(su1006)); otIs181(dat-1::mCherry, ttx-3::mCherry) III	1	0	0.98	0	1	0	0.97	0	30
NFB2515	vlcEx1307(nlp-16::NLS::eGFP; rol-6(su1006)); otIs181(dat-1::mCherry, ttx-3::mCherry) III	1	0	0.98	0	1	0	0.98	0	30	802	-786	27	NO	No ttx-3 or DA colocalization. Usually, around 4 o 6 cells can be seen located between ventral and dorsal CEPs
NFB2540	vlcEx1319(nlp-16::NLS::eGFP; rol-6(su1006)); otIs181(dat-1::mCherry, ttx-3::mCherry) III	1	0	0.93	0	0.98	0	0.98	0	30
NFB2507	vlcEx1299(R11G1.1::NLS::eGFP; rol-6(su1006)); otIs181(dat-1::mCherry, ttx-3::mCherry) III	0.97	0.85	0.9	0.82	0.88	0.78	0.98	0.88	30	748	-375	34	YES	Intense DA but no ttx-3 colocalization. Two pairs appears located behind the secong bulb and a few more cells more posteriorlly, but antior to the ADEs.
NFB2508	vlcEx1300(R11G1.1::NLS::eGFP; rol-6(su1006)); otIs181(dat-1::mCherry, ttx-3::mCherry) III	0.93	0.8	0.72	0.57	0.8	0.68	0.97	0.85	30
NFB2502	vlcEx1294(tba-9::NLS::eGFP; rol-6(su1006)); otIs181(dat-1::mCherry, ttx-3::mCherry) III	1	0.87	1	0.92	1	0.87	1	0.92	30	1100	-551	33	YES	Intense GFP expression including 10 to 12 pairs within the Amphid region, around 12 cells within the labials' region, ttx-3(+), AQR(+), around 6 cells within the ventral ganglion, PDE(+) and putative phasmid neurons.
NFB2501	vlcEx1293(tba-9::NLS::eGFP; rol-6(su1006)); otIs181(dat-1::mCherry, ttx-3::mCherry) III	1	0.97	0.97	0.95	0.97	0.97	1	0.98	30
NFB2516	vlcEx1308(trp-4::NLS::eGFP; rol-6(su1006)); otIs181(dat-1::mCherry, ttx-3::mCherry) III	1	0	1	0	0.97	0	1	0	30	1124	-3719	33	NO	No ttx-3 or DA colocalization. GFP expression is seen in a pair located around the dorsal CEPs
NFB2541	vlcEx1320(trp-4::NLS::eGFP; rol-6(su1006)); otIs181(dat-1::mCherry, ttx-3::mCherry) III	1	0	0.98	0	1	0	1	0	30
NFB2503	vlcEx1295(twk-3::NLS::eGFP; rol-6(su1006)); otIs181(dat-1::mCherry, ttx-3::mCherry) III	0.98	0.97	0.75	0.67	0.7	0.55	0.98	0.48	30	758	-380	33	YES	DA but no ttx-3 colocalization. Odd pattern, with a pair of giant cells located at the beginning of the pharynx, just before the first bulb flares. They seem to have cilia, could they be BAG? GFP also appear in cells in the tail and neighbouring PDE. Maybe in AQR. It also seems to be expressed at the end of the instestine.
NFB2504	vlcEx1296(twk-3::NLS::eGFP; rol-6(su1006)); otIs181(dat-1::mCherry, ttx-3::mCherry) III	1	0.97	0.6	0.58	0.72	0.38	1	0.28	30
NFB2542	vlcEx1321(ZK757.10::NLS::eGFP; rol-6(su1006)); otIs181(dat-1::mCherry, ttx-3::mCherry) III	1	0.95	1	0.88	1	0.87	0.93	0.7	30	712	-696	31	YES	The usual pattern includes around 6 cells within the labial area, ADE, PDE and 4 to 6 cells in the tail.
NFB2543	vlcEx1322(ZK757.10::NLS::eGFP; rol-6(su1006)); otIs181(dat-1::mCherry, ttx-3::mCherry) III	1	0.9167	1	0.9333	1	0.9667	1	0.9167	30
R: RED (mCherry positive neurons)
RG: RED + GREEN (mCherry and eGFP positive neurons)
