# Supplementary material for: Joint actions of diverse transcription factor families establish neuron-type identities and promote enhancer selectivity
Source: HighWire-hosted journal article supplement (doi:10.1101/gr.275623.121), 2022-01-24
Supplement: Supplemental_Table_S10.xlsx [file Supplemental_Table_S10.xlsx]

## Sheet: Strains
Strain	Genotype	Source
N2	wild type	CGC
NFB753	rrf-3(pk1426) II; otIs181[dat-1::mCherry + ttx-3::mCherry] III; lin-15B(n765) X; vsIs97[tph-1p::DsRed2 + lin-15(+)] X; ; otIs224[cat-1::gfp]	This work
PHX4741	dat-1(syb4741) III	This work (Suny Biotech)
NFB2518	dat-1(syb4741) III; him-8(e1489) IV	This work
CZ1072	unc-62(e917) V	CGC
NFB2526	dat-1(syb4741) III; unc-62(e917) V	This work
NFB838	vab-3(ot346) X	This work
NFB2527	dat-1(syb4741) III; vab-3(ot346) X	This work
PHX4698	cat-2(syb4698) II	This work (Suny Biotech)
NFB2525	cat-2(syb4698) II; otIs181(dat-1::mCherry, ttx-3::mCherry) III	This work
NFB2524	cat-2(syb4698) II; unc-62(e917) V	This work
NFB2500	cat-2(syb4698) II; vab-3(ot346) X	This work
OH15039	pha-1(e2123) III; him-5(e1490) V; otIs625 [cat-1(fosmid)::SL2::mCherry::H2B + pha-1(+)]	Dr. Hobert's Lab
NFB2498	pha-1(e2123) III; him-5(e1490) V; unc-62(e917) V; otIs625 [cat-1(fosmid)::SL2::mCherry::H2B + pha-1(+)]	This work
NFB2521	pha-1(e2123) III; him-5(e1490) V; vab-3(ot346) X; otIs625 [cat-1(fosmid)::SL2::mCherry::H2B + pha-1(+)]	This work
OH8250	otIs225(cat-4::gfp) II	Dr. Hobert's Lab
NFB1200	otIs225[cat-4::gfp] II; unc-62(e917) V	This work
NFB872	otIs225[cat-4::gfp] II; vab-3(ot346) X	This work
NFB2556	vlcEx1325(dat-1::unc-62[sense]; dat-1::unc-62[antisense]; ttx-3::mCherry; rol-6(su1006)); dat-1(syb4741) III	This work
NFB2554	vlcEx1323(dat-1::vab-3[sense]; dat-1::vab-3[antisense]; ttx-3::mCherry; rol-6(su1006)); dat-1(syb4741) III	This work
NFB2555	vlcEx1325(dat-1::unc-62[sense]; dat-1::unc-62[antisense]; ttx-3::mCherry; rol-6(su1006)); cat-2(syb4698) II	This work
NFB2553	vlcEx1323(dat-1::vab-3[sense]; dat-1::vab-3[antisense]; ttx-3::mCherry; rol-6(su1006)); cat-2(syb4698) II	This work
NFB2186	vlcEx1166[cat-2prom21::gfp, rol-6]	This work
NFB2187	vlcEx1167[cat-2prom21::gfp, rol-6]	This work
NFB833	vlcEx461[Mcat-2prom2::gfp, rol-6]	This work
NFB1093	vlcEx602[Mcat-2prom2::gfp, rol-6]	This work
NFB905	vlcEx492[Mcat-2prom-3::gfp, rol-6]	This work
NFB906	vlcEx493[Mcat-2prom-3::gfp, rol-6]	This work
PHX5072	cat-2(syb4698 syb5072) II	This work (SunyBiotech)
PHX5026	cat-2(syb4698 syb5026) II	This work (SunyBiotech)
NFB2565	cat-2(syb4698 syb5072) II	This work
NFB2566	cat-2(syb4698 syb5026) II	This work
NFB2510	vlcEx1302(ceh-43::NLS::eGFP; rol-6(su1006)); otIs181(dat-1::mCherry, ttx-3::mCherry) III	This work
NFB2531	vlcEx1310(ceh-43::NLS::eGFP; rol-6(su1006)); otIs181(dat-1::mCherry, ttx-3::mCherry) III	This work
NFB2532	vlcEx1311(ace-1::NLS::eGFP; rol-6(su1006)); otIs181(dat-1::mCherry, ttx-3::mCherry) III	This work
NFB2533	vlcEx1312(ace-1::NLS::eGFP; rol-6(su1006)); otIs181(dat-1::mCherry, ttx-3::mCherry) III	This work
NFB2511	vlcEx1303(asic-1::NLS::eGFP; rol-6(su1006)); otIs181(dat-1::mCherry, ttx-3::mCherry) III	This work
NFB2534	vlcEx1313(asic-1::NLS::eGFP; rol-6(su1006)); otIs181(dat-1::mCherry, ttx-3::mCherry) III	This work
NFB2535	vlcEx1314(K10C2.2-1::NLS::eGFP; rol-6(su1006)); otIs181(dat-1::mCherry, ttx-3::mCherry) III	This work
NFB2509	vlcEx1301(K10C2.2::NLS::eGFP; rol-6(su1006)); otIs181(dat-1::mCherry, ttx-3::mCherry) III	This work
NFB2512	vlcEx1304(dop-2::NLS::eGFP; rol-6(su1006)); otIs181(dat-1::mCherry, ttx-3::mCherry) III	This work
NFB2536	vlcEx1315(dop-2::NLS::eGFP; rol-6(su1006)); otIs181(dat-1::mCherry, ttx-3::mCherry) III	This work
NFB2513	vlcEx1305(dop-2::NLS::eGFP; rol-6(su1006)); otIs181(dat-1::mCherry, ttx-3::mCherry) III	This work
NFB2537	vlcEx1316(dop-2::NLS::eGFP; rol-6(su1006)); otIs181(dat-1::mCherry, ttx-3::mCherry) III	This work
NFB2517	vlcEx1309(F59F3.6::NLS::eGFP; rol-6(su1006)); otIs181(dat-1::mCherry, ttx-3::mCherry) III	This work
NFB2538	vlcEx1317(F59F3.6::NLS::eGFP; rol-6(su1006)); otIs181(dat-1::mCherry, ttx-3::mCherry)	This work
NFB2514	vlcEx1306(mca-2::NLS::eGFP; rol-6(su1006)); otIs181(dat-1::mCherry, ttx-3::mCherry) III	This work
NFB2539	vlcEx1318(mca-2::NLS::eGFP; rol-6(su1006)); otIs181(dat-1::mCherry, ttx-3::mCherry) III	This work
NFB2515	vlcEx1307(nlp-16::NLS::eGFP; rol-6(su1006)); otIs181(dat-1::mCherry, ttx-3::mCherry) III	This work
NFB2540	vlcEx1319(nlp-16::NLS::eGFP; rol-6(su1006)); otIs181(dat-1::mCherry, ttx-3::mCherry) III	This work
NFB2507	vlcEx1299(R11G1.1::NLS::eGFP; rol-6(su1006)); otIs181(dat-1::mCherry, ttx-3::mCherry) III	This work
NFB2508	vlcEx1300(R11G1.1::NLS::eGFP; rol-6(su1006)); otIs181(dat-1::mCherry, ttx-3::mCherry) III	This work
NFB2502	vlcEx1294(tba-9::NLS::eGFP; rol-6(su1006)); otIs181(dat-1::mCherry, ttx-3::mCherry) III	This work
NFB2501	vlcEx1293(tba-9::NLS::eGFP; rol-6(su1006)); otIs181(dat-1::mCherry, ttx-3::mCherry) III	This work
NFB2516	vlcEx1308(trp-4::NLS::eGFP; rol-6(su1006)); otIs181(dat-1::mCherry, ttx-3::mCherry) III	This work
NFB2541	vlcEx1320(trp-4::NLS::eGFP; rol-6(su1006)); otIs181(dat-1::mCherry, ttx-3::mCherry) III	This work
NFB2503	vlcEx1295(twk-3::NLS::eGFP; rol-6(su1006)); otIs181(dat-1::mCherry, ttx-3::mCherry) III	This work
NFB2504	vlcEx1296(twk-3::NLS::eGFP; rol-6(su1006)); otIs181(dat-1::mCherry, ttx-3::mCherry) III	This work
NFB2542	vlcEx1321(ZK757.10::NLS::eGFP; rol-6(su1006)); otIs181(dat-1::mCherry, ttx-3::mCherry) III	This work
NFB2543	vlcEx1322(ZK757.10::NLS::eGFP; rol-6(su1006)); otIs181(dat-1::mCherry, ttx-3::mCherry) III	This work
OH8249	otIs224(cat-1::gfp) V	Dr. Hobert's Lab
OH8246	otIs221(cat-1::gfp) III	Dr. Hobert's Lab
OH8480	otIs221(cat-1::gfp) III; him-8(e1489) IV	Dr. Hobert's Lab
CT11	hbl-1(mg285) X	CGC
NFB2340	otIs221(cat-1::gfp) III; hbl-1(mg285) X	This work
MT529	him-5(e1467) V; lin-14(n179) X	CGC
NFB2080	otIs221(cat-1::gfp) III; lin-14(n179) X	This work
TU2362	vab-15(u781) X	CGC
NFB2385	otIs221[cat-1::gfp] III; vab-15(u781) X	This work
NFB882	otIs221[cat-1::gfp] III; unc-62(e917) V	This work
NFB2479	otIs287[rab-3(prom1)::2xNLS::YFP+rol-6(su1006)] IV; vsIs33(dop-3::RFP) V	This work
OH10425	otIs337[unc-86fos::NLS::YFP::H2B; ttx-3::mCherry]	Dr. Hobert's Lab
NFB2491	otIs287[rab-3(prom1)::2xNLS::YFP+rol-6(su1006)] IV; vsIs33(dop-3::RFP) V; hbl-1(mg285) X	This work
NFB2495	otIs287[rab-3(prom1)::2xNLS::YFP+rol-6(su1006)] IV; vsIs33(dop-3::RFP) V; lin-14(n179) X	This work
NFB2497	otIs287[rab-3(prom1)::2xNLS::YFP+rol-6(su1006)] IV; vsIs33(dop-3::RFP) V; vab-15(u781) X	This work
NFB2490	otIs337[unc-86fos::NLS::YFP::H2B; ttx-3::mCherry]; unc-62(e917) V	This work
OH10689	otIs355 [rab-3p(prom1)::2xNLS::TagRFP] IV	Dr. Hobert's Lab
NFB2489	otIs355 [rab-3p(prom1)::2xNLS::TagRFP] IV; unc-62(e917) V	This work
OH7547	otIs199(cat-2::gfp, rgef-1(F25B3.3)::dsred, rol-6) I	Dr. Hobert's Lab
CF1632	unc-62(mu232), muIs35 [mec-7::GFP + lin-15(+)] V	CGC
NFB881	otIs199[cat-2p::gfp, rgef-1(F25B3.3)p::dsred, rol-6(su1006)] I; unc-62(mu232) muIs35[mec-7p::gfp + lin-15(+)] V	This work
NFB826	otIs199[cat-2p::gfp, rgef-1(F25B3.3)p::dsred, rol-6(su1006)] I; vab-3(ot346) X	This work
-	nIs118 (cat-2::gfp)	Dr. Hobert's Lab
NFB2561	unc-62(e917) V; nIs118 (cat-2::gfp)	This work
CB2030	unc-62(e644) dpy-11(e224) V	CGC
NFB885	unc-62(e644) dpy-11(e224) V; nIs118[cat-2p::gfp]	This work
BY200	vtIs1[dat-1p::GFP, rol-6(su1006)] V	CGC
NFB2299	vtIs1[dat-1p::gfp, rol-6(su1006)], unc-62(e917) V	This work
NFB177	otIs259[dat-1::gfp, rol-6(su1006)]	This work
NFB1201	unc-62(e917) V; otIs259[dat-1p::gfp, rol-6 (su1006)]	This work
NFB875	vtIs1[dat-1p::gfp, rol-6(su1006)] V; vab-3(ot346) X	This work
NFB874	otIs221(cat-1::gfp) III; vab-3(ot346) X	This work
OH8251	otIs226(bas-1::gfp) IV	Dr. Hobert's Lab
NFB1199	otIs226(bas-1::gfp) IV; unc-62 (e917) V	This work
NFB873	otIs226(bas-1::gfp) IV; vab-3(ot346) X	This work
OH8510	otIs236(asic-1prom1::gfp)	Dr. Hobert's Lab
NFB1210	unc-62(e917) V; otIs236 (asic-1prom::gfp)	This work
NFB2028	vab-3(ot346) X; otIs236(asic-1prom1::gfp)	This work
NFB2297	otIs355[rab-3p(prom1)::2xNLS::tagRFP] IV; nIs118[cat-2p::gfp]	This work
NFB2298	otIs355[rab-3p(prom1)::2xNLS::tagRFP] IV; unc-62(e917) V; nIs118[cat-2p::gfp]	This work
-	otIs395(ift-20::tagRFP) III; him-5(e1490) V	Dr. Hobert's Lab
NFB26	otIs395(ift-20p::tagRFP) III; vtIs1[dat-1p::gfp, rol-6(su1006)] V	This work
NFB2033	otIs395(ift-20p::tagRFP) III; vtIs1[dat-1p::gfp, rol-6(su1006)], unc-62(e917) V	This work
ZG629	iaIs22[gcy-36p::gfp + unc-119(+)]	CGC
NFB2257	vab-3(ot346) X; iaIs22[gcy-36p::gfp + unc-119(+)]	This work
NFB1719	vlcIs7(mod-5p::T2A::mneongreen) I	This work
NFB2296	vlcIs7(mod-5p::T2A::mneongreen) I; vab-3(ot346) X	This work
NFB2243	vlcEx1200[dat-1p(prom1)::vab-3 cDNA, unc-122p::gfp, gDNA]; otIs199[cat-2p::gfp, rgef-1(F25B3.3)p::dsred, rol-6(su1006)] I; vab-3(ot346) X	This work
NFB2244	vlcEx1201[dat-1p(prom1)::vab-3 cDNA, unc-122p::gfp, gDNA]; otIs199[cat-2p::gfp, rgef-1(F25B3.3)p::dsred, rol-6(su1006)] I; vab-3(ot346) X	This work
NFB2251	vlcEx1208[dat-1p(prom1)::Pax6 cDNA, unc-122p::gfp, gDNA]; otIs199[cat-2p::gfp, rgef-1(F25B3.3)p::dsred, rol-6(su1006)] I; vab-3(ot346) X	This work
NFB2252	vlcEx1209[dat-1p(prom1)::Pax6 cDNA, unc-122p::gfp, gDNA]; otIs199[cat-2p::gfp, rgef-1(F25B3.3)p::dsred, rol-6(su1006)] I; vab-3(ot346) X	This work
NFB14	zfIs10(tdc-1p::mCherry) IV	This work
VC1392	zip-5(gk646) V	CGC
NFB1849	zfIs10(tdc-1p::mCherry) IV; zip-5(gk646) V	This work
VC2215	bed-3(gk996) IV	CGC
NFB2388	otIs221(cat-1p::gfp) III; bed-3(gk996) IV	This work
OH9279	otIs266(cat-1prom1::mCherry) I	Dr. Hobert's Lab
FX00919	ceh-44(tm919) III	NBRP
NFB2389	otIs266(cat-1prom1::mCherry) I; ceh-44(tm919) III	This work
MT4156	lin-26(n156)/mnC1 [dpy-10(e128) unc-52(e444)] II; him-5(e1490) V	CGC
NFB2390	lin-26(n156)/mnC1 [dpy-10(e128) unc-52(e444)] II; otIs221(cat-1p::gfp) III	This work
FX00860	nhr-2(tm860) I	NBRP
NFB2391	nhr-2(tm860) I; otIs221(cat-1p::gfp) III	This work
FX01619	ceh-12(tm1619) I	NBRP
NFB2392	ceh-12(tm1619) I; otIs221[cat-1p::gfp] III	This work
SK4013	zdIs13(tph-1p::gfp) IV	CGC
RB2499	zip-10(ok3462) V	CGC
NFB1784	zdIs13[tph-1p::gfp] IV; zip-10(ok3462) V	This work
OH8481	otIs226(bas-1::gfp) IV; him-5(e1490) V	Dr. Hobert's Lab
FX14560	dro-1(tm4702) III; eTv1 (III/V)	NBRP
NFB1993	dro-1(tm4702) III; eTv1 (III/V); otIs226(bas-1::gfp) IV	This work
