# Supplementary material for: Joint actions of diverse transcription factor families establish neuron-type identities and promote enhancer selectivity
Source: HighWire-hosted journal article supplement (doi:10.1101/gr.275623.121), 2022-01-24
Supplement: Supplemental_Table_S11.xlsx [file Supplemental_Table_S11.xlsx]

## Sheet: Primers
Mutants' Genotyping Primers
Gene	Allele	Type of Mutation	Forward primer	Reverse primer (WT)	Reverse primer (Mutant)
rrf-3	pk1426	Deletion	tccgagttcgcatcaagtttcac	agacgaaatccggcatgatcc	cactcccgcgtgtttcaaattcttc
eri-1	mg366	23 nt insertion	tccaacaaacgacagatccag	ttgcccaagaaacagtcgatg	cgaatttcgataaagtgcctg
lin-15b	n744	Point mutation	tcaggaccatcacaggatc	atgacatccaccgatgctc	-
unc-62	e917	Deletion	gtaattcgccgtttagcatagctg	tgacaagcgacaacggattc	tcaattttgagccaactacacagc
mef-2	gv1	Deletion	aagagagccagagagcacatag	tgagttgaagacgatgagtgc	aattgctgtggtctccactc
mef-2	gk633	Deletion	gctcgtgtaattcgtaccttcg	gggctttagggaagaagagag	caagattggtgagagaaatgaacg
lag-1	om13	Point mutation	tctctcaacttcacaaatgtgc	gaacaatgaagactctcttcacttc	-
zip-5	gk646	Deletion	gagacctatgtcattcgagaacc	aaagggacttcacatatccacg	tccacttgatgtgtgtacgtgtc
lag-1	q385	Point mutation	tgaaagtttggtttggagcaacc	tctcattctggagcgaatcc	-
lin-28	n719	Point mutation	cgctagtgccgatttacgatctc	cacctcgatactttggctcatg	-
lin-40	ku285	Point mutation	accgacgctccatatcagatc	cgggcttcttcttatccacttc	-
hlh-14	gm34	Point mutation	Genotyped visially by phenotype
hlh-14	ok780	Deletion	acttatatccatagagcccaagtcac	atcaggtaagataagtcttcatgtgct	gaagatgaggaaactgatgatgttgg
hbl-1	mg285	Deletion	cactgatagagcacaagttgcac	gcacttctccaatcaccagtag	gtatcggcatttgtggcatctg
vab-15	u781	Point mutation	tgccaatagtaagctccgacag	tgaatcttggcgtcatcgctag	-
sex-1	y263	Point mutation	cagcttcatatacggcgtcaac	tgtgagatcaaacgcgagag	-
nob-1	os6	Point mutation	acctgctctcagtctgtgtcatc	acacaaccctgtgcaaacgag	-
lin-14	n179	Point mutation	tggaacaacaaacggaactgc	ttgtgacatgagacgtggtcc	-
bed-3	gk996	Deletion	ctattgaacaagctgccgagtg	tcatcgcgcaatcgtctac	tggataaggaaaggtgttcgag
ceh-44	tm919	Deletion + 2 nt insertion	aaaggtgcagaagcctggaag	tccgcttaaagtcagccacag	tttccagttgggagacacgttc
lin-26	n156	Point mutation	acaagcgacgatcaagtacgtg	ctacaaactgcacgcatcacac	-
nhr-2	tm860	Deletion	tcccttgcatccttcacaactc	ttcagcgcaaccactccaaac	acacaatctctccaccactcac
ceh-12	tm1619	Deletion	catgcttctcctcacacatcag	aatgcggttcgtggtcttc	tttccaatcagccgacagc
zip-10	ok3462	Deletion	ccgtggagaatcaaagaggtc	ctgcttctttgggaacatctacc	tccactcaacccatcaattctg
Rescue Cloning Primers
Construct name	Sequence	Fragment lenght (bp)	Forward primer	Reverse primer
vlcEx1200/1	vab-3 cDNA	1392	gagagaGGTACCATGTCAGATGCTGGACACAC	gagagaGATATCCTACTGAGGTCTCCAATAATGTTC
vlcEx1208/9	Pax6 cDNA	1335	gagagaGGTACCatgcagaacagtcacagc	gagagaGATATCttactgtaatcgaggccagtac
Windows Cloning Primers
Construct name	Sequence	Window lenght (bp)	Forward primer	Reverse NLS::GFP Fusion primer
vlcEx1311 & vlcEx1312	ace-1	978	ttttattttgaacaatttgcaaaccg	GTTTCTTCTTTGGAGCGGTCATgcttcttcaacaaatcataatcg
vlcEx1303 & vlcEx1313	asic-1	740	tctttataggtccgcgttcatg	GTTTCTTCTTTGGAGCGGTCATgttttctatatcagggatagacGGC
vlcEx1302 & vlcEx1310	ceh-43	758	ggtggattacggtagaatagagtg	GTTTCTTCTTTGGAGCGGTCATgctcacacctgcatcgtttc
vlcEx1305 & vlcEx1316	dop-2_IN	760	gccatacgcggtttatgtatatg	GTTTCTTCTTTGGAGCGGTCATcctgacgctttctctaatctacc
vlcEx1304 & vlcEx1315	dop-2_UP	824	gacagaagaaaaacattcaatgacc	GTTTCTTCTTTGGAGCGGTCATacgtaatagattttagtttctcagaatg
vlcEx1309 & vlcEx1317	F59F3.6	1061	cacaacatcaaaatttgtattcaTTG	GTTTCTTCTTTGGAGCGGTCATactgcgattgaagctatagag
vlcEx1298 & vlcEx1297	flp-33	345	atacttgcttccacccgaaa	GTTTCTTCTTTGGAGCGGTCATggtagggggaccctggaa
vlcEx1314 & vlcEx1301	K10C2.2	902	cctgagcattcaaaacacaag	GTTTCTTCTTTGGAGCGGTCATttacggtttaccaaatgccg
vlcEx1306 & vlcEx1318	mca-2	1055	cttctcaacttactcttgactctTG	GTTTCTTCTTTGGAGCGGTCATggcaatttgccggaaaaacg
vlcEx1307 & vlcEx1319	nlp-16	802	tgtttcagaacctttttaatatgctc	GTTTCTTCTTTGGAGCGGTCATtggagagaagatttgatttgtgg
vlcEx1299 & vlcEx1300	R11G1.1	748	atgtttgaatccctacaattcttg	GTTTCTTCTTTGGAGCGGTCATggaaagactggaactggttac
vlcEx1294 & vlcEx1293	tba-9	1100	caagcaagagtatagaccatattg	GTTTCTTCTTTGGAGCGGTCATtctgaagaattcgaagaagtaatag
vlcEx1308 & vlcEx1320	trp-4	1124	caagcgtttaccgactgaac	GTTTCTTCTTTGGAGCGGTCATgaaataatcaaaattgagaaaaaacgac
vlcEx1295 & vlcEx1296	twk-3	758	gcactattccgaataataaaatacc	GTTTCTTCTTTGGAGCGGTCATttttaagaagaacaaggaaaaagttg
vlcEx1321 & vlcEx1322	ZK757.10	712	gaatcagatttatgcacacacag	GTTTCTTCTTTGGAGCGGTCATcatcagaagtttgcgaaacaaC
CRISPRs' Genotyping Primers
Gene	Allele	Amplicon (bp)	Forward Primer	Reverse Primer
cat-2	syb4698	494	gagggcagaggaagtctgc	gttagtaccgaactgtttaaacttac
dat-1	syb4741
unc-62	syb4748
cat-2	syb5072	515	actatgtgaagtcacacctgtc	acaaagaacattgttttcgaggtc
cat-2	syb5026
RNAi Cloning Primers
Target	Nature	Source	Primer Type	Primer Sequence
dat-1	promoter	pNF707	FW	TGCAGgcctattccagtatg
			FW*	gcctattccagtatgacccctttg
			RV Fus unc-62 SENSE	gagcccacacttttgagtcgccgctctgaaaacacatgaatctagtatag
			RV Fus unc-62 ANTI	GGTTGATCTCTCAGCACCACACGAActgaaaacacatgaatctagtatag
			RV Fus vab-3 SENSE	TCACACCAGTGTGTCCAGCATCTGActgaaaacacatgaatctagtatag
			RV Fus vab-3 ANTI	ACAAGAACATTATTGGAGACCTCAGctgaaaacacatgaatctagtatag
vab-3	cDNA	pNF705	FW	agcggcgactcaaaagtg
			RV	ttcgtgtggtgctgagag
			RV* SENSE	ggtgctgagagatcaacccattg
			RV* ANTI	actcaaaagtgtgggctcacg
unc-62	cDNA	pNF697	FW	TCAGATGCTGGACACACTG
			RV	CTGAGGTCTCCAATAATGTTCTTG
			RV* SENSE	TCCAATAATGTTCTTGTGTGAGGTCG
			RV* ANTI	TGGACACACTGGTGTGAATCAAC
*: nested primer
Additional Primers
Target	Nature	Source	Primer Type	Primer Sequence
NLS	cDNA	pNF400	FW	ATGACCGCTCCAAAGAAGAAAC
GFP	cDNA	pNF400	RV	ggaaacagttatgtttggtata
unc-62	cDNA	unc-62 cDNA	FW	gagagaACCGGTatgtttcgaatgatactaacataacatag
			RV	gagagaTGGCCATTATTCGTGTGGTGCTGAG

## Sheet: Plasmids
Name	Construct	Source
pPD95.75	gfp	Addgene
pRF4	rol-6(su1006)	Hobert Lab gift
pNF101	ttx-3::mCherry	Hobert Lab gift
pNF400	NLS::GFP	Flames Lab
pNF417	unc-122::rfp	Hobert Lab gift
pNF697	dat-1p::unc-62	This work
pNF699	dat-1p::Pax6	This work
pNF705	dat-1p::vab-3	This work
pNF707	dat-1p	Flames Lab
